# Supplementary material for: Lipid homeostasis is essential for a maximal ER stress response
Source: eLife. 2023 Jul 25;12:e83884. doi: 10.7554/eLife.83884 (PMC10368420; doi:10.7554/eLife.83884)
Supplement: Source data 1. — Unprocessed lipidomic analysis data from animals grown on Empty Vector control or let-767 RNAi and collected at day 1 of adulthood. [file elife-83884-data1.xlsx]

## Sheet: Sheet1
						Label	#1	#2	#3	#4	#5	#6	#7	#8	#9	#10	#11	#12	Biorec001	Biorec002	Biorec003	Biorec004	Biorec005	Biorec006	MtdBlank001	MtdBlank002	MtdBlank003	MtdBlank004	MtdBlank005	MtdBlank006	PoolQC001	PoolQC002	PoolQC003	PoolQC004	PoolQC005	PoolQC006
						Sample #	1	2	3	4	5	6	7	8	9	10	11	12	QC	QC	QC	QC	QC	QC	Blank	Blank	Blank	Blank	Blank	Blank	Pool	Pool	Pool	Pool	Pool	Pool
						Species	Caenorhabditis elegans	Caenorhabditis elegans	Caenorhabditis elegans	Caenorhabditis elegans	Caenorhabditis elegans	Caenorhabditis elegans	Caenorhabditis elegans	Caenorhabditis elegans	Caenorhabditis elegans	Caenorhabditis elegans	Caenorhabditis elegans	Caenorhabditis elegans	Human	Human	Human	Human	Human	Human							Caenorhabditis elegans	Caenorhabditis elegans	Caenorhabditis elegans	Caenorhabditis elegans	Caenorhabditis elegans	Caenorhabditis elegans
						Organ	Whole worms in M9 buffer	Whole worms in M9 buffer	Whole worms in M9 buffer	Whole worms in M9 buffer	Whole worms in M9 buffer	Whole worms in M9 buffer	Whole worms in M9 buffer	Whole worms in M9 buffer	Whole worms in M9 buffer	Whole worms in M9 buffer	Whole worms in M9 buffer	Whole worms in M9 buffer	Plasma	Plasma	Plasma	Plasma	Plasma	Plasma							Whole worms in M9 buffer	Whole worms in M9 buffer	Whole worms in M9 buffer	Whole worms in M9 buffer	Whole worms in M9 buffer	Whole worms in M9 buffer
						Treatment	let-767-2xC	let-767-2xC	let-767-2xC	let-767-2xC	let-767-2xC	let-767-2xC	N2-2xC control	N2-2xC control	N2-2xC control	N2-2xC control	N2-2xC control	N2-2xC control
						File ID	Garcia047_MX460660_posCSH_-1-001.d	Garcia002_MX460660_posCSH_-2-002.d	Garcia007_MX460660_posCSH_-3-003.d	Garcia017_MX460660_posCSH_-4-004.d	Garcia040_MX460660_posCSH_-5-005.d	Garcia039_MX460660_posCSH_-6-006.d	Garcia005_MX460660_posCSH_-7-007.d	Garcia038_MX460660_posCSH_-8-008.d	Garcia016_MX460660_posCSH_-9-009.d	Garcia004_MX460660_posCSH_-10-010.d	Garcia020_MX460660_posCSH_-11-011.d	Garcia014_MX460660_posCSH_-12-012.d	Biorec001_MX460660_posCSH_preGarcia001.d	Biorec002_MX460660_posCSH_postGarcia010.d	Biorec003_MX460660_posCSH_postGarcia020.d	Biorec004_MX460660_posCSH_postGarcia030.d	Biorec005_MX460660_posCSH_postGarcia040.d	Biorec006_MX460660_posCSH_postGarcia049.d	MtdBlank001_MX460660_posCSH_preGarcia001.d	MtdBlank002_MX460660_posCSH_postGarcia010.d	MtdBlank003_MX460660_posCSH_postGarcia020.d	MtdBlank004_MX460660_posCSH_postGarcia030.d	MtdBlank005_MX460660_posCSH_postGarcia040.d	MtdBlank006_MX460660_posCSH_postGarcia049.d	PoolQC001_MX460660_posCSH_preGarcia001.d	PoolQC002_MX460660_posCSH_postGarcia010.d	PoolQC003_MX460660_posCSH_postGarcia020.d	PoolQC004_MX460660_posCSH_postGarcia030.d	PoolQC005_MX460660_posCSH_postGarcia040.d	PoolQC006_MX460660_posCSH_postGarcia049.d
Identifier	Annotation	Species	InChI Key	m/z		RT	Peak Height	Peak Height	Peak Height	Peak Height	Peak Height	Peak Height	Peak Height	Peak Height	Peak Height	Peak Height	Peak Height	Peak Height	Peak Height	Peak Height	Peak Height	Peak Height	Peak Height	Peak Height	Peak Height	Peak Height	Peak Height	Peak Height	Peak Height	Peak Height	Peak Height	Peak Height	Peak Height	Peak Height	Peak Height	Peak Height
11.82_1076.02_11.82_729.65_11.82_724.70	1_CE 22:1; iSTD	[M+Chol-head-H2O+H]+_[M+Na]+_[M+NH4]+	SQHUGNAFKZZXOT-JWTURFAQSA-N	1076.017_729.6535_724.6989	ESI (+)	11.8217	668022	832260	776517	809452	755674	737517	677588	732380	795482	737788	707796	756604	560630	545583	550615	547770	518913	423631	809816	856013	827762	822987	773913	667922	778588	794457	765970	751295	743708	628093
6.16_552.54_6.16_534.52_6.17_574.52	1_Cer d18:1/17:0; iSTD	[M+H]+_[M+H-H2O]+_[M+Na]+	ICWGMOFDULMCFL-QKSCFGQVSA-N	552.5356_534.525_574.5188	ESI (+)	6.16133	411178	449757	377401	331562	396664	425366	306335	350253	367679	368921	373629	369410	194669	204661	221083	216381	202126	217979	268076	274970	282530	294912	289835	308631	365251	355061	362301	372002	383824	411854
4.97_376.40	1_Cholesterol d7 iSTD	[M+H-H2O]+	HVYWMOMLDIMFJA-IFAPJKRJSA-N	376.396	ESI (+)	4.968	43859	46139	40227	41622	42339	38775	34557	41755	40601	36904	37011	40672	14529	15018	13798	14522	13999	14304	40376	40236	41629	42432	44792	45303	40076	38173	40075	39747	41467	43845
0.78_341.28	1_CUDA iSTD	[M+H]+	HPTJABJPZMULFH-UHFFFAOYSA-N	341.28	ESI (+)	0.781	226657	203782	210044	205560	217685	216233	203946	220239	210067	200247	214580	212366	108377	113722	116572	121726	116929	122270	190563	204718	206237	215952	213553	220511	196129	206540	216632	216143	214875	229954
4.39_495.35_4.39_479.37_4.39_474.42	1_DG 12:0/12:0/0:0; iSTD	[M+K]+_[M+Na]+_[M+NH4]+	OQQOAWVKVDAJOI-VWLOTQADSA-N	495.3451_479.3742_474.416	ESI (+)	4.38933	129670	158831	140195	138511	139804	124939	122978	130667	139168	133171	126495	138098	70553	77917	79020	78285	73949	73221	126399	135660	134565	142561	134641	136501	144041	136551	131397	130770	123434	121855
3.23_437.27_3.23_421.29_3.23_416.34	1_DG 18:1/2:0/0:0; iSTD	[M+K]+_[M+Na]+_[M+NH4]+	PWTCCMJTPHCGMS-YRBAHSOBSA-N	437.2664_421.2933_416.3383	ESI (+)	3.23367	612758	832547	759308	753778	711624	681380	745988	724076	786709	731756	700271	721989	414719	408625	394242	395714	384542	328976	768189	701778	732873	708622	662771	628686	740668	763776	743502	711137	714629	589129
1.85_510.36	1_LPC 17:0; iSTD	[M+H]+	SRRQPVVYXBTRQK-XMMPIXPASA-N	510.356	ESI (+)	1.851	13009	12850	11324	12055	12515	11921	9609	12488	12217	10973	11020	12380	6715	7139	8321	8704	8272	9003	8789	10552	10354	11299	11591	11903	11586	11211	11941	12513	12684	13809
1.45_466.29	1_LPE 17:1; iSTD	[M+H]+	LNJNONCNASQZOB-HEDKFQSOSA-N	466.293	ESI (+)	1.454	43894	41862	38802	36898	40499	41287	31532	40033	37558	35298	35276	37821	16077	17504	18997	18762	19148	19167	29480	31468	31382	34823	34715	35980	34354	36139	37016	38483	40868	43234
3.11_362.33_3.11_345.30_3.11_367.28	1_MG 17:0/0:0/0:0; iSTD	[M+NH4]+_[M+H]+_[M+Na]+	SVUQHVRAGMNPLW-UHFFFAOYSA-N	362.3269_345.3004_367.2828	ESI (+)	3.11367	242287	298427	283492	269602	268206	261664	237615	271615	270187	266548	248931	287602	143528	151242	162855	169214	144338	145911	251463	266038	264482	282293	275390	254873	272049	271620	258910	272145	270041	261907
3.66_636.46	1_PC 12:0/13:0; iSTD	[M+H]+	FCTBVSCBBWKZML-WJOKGBTCSA-N	636.461	ESI (+)	3.656	13850	12972	11635	11679	12758	12695	9777	12338	12074	11134	10883	11804	5669	6520	7573	6774	6916	6883	10252	11166	11329	11804	12311	11808	10754	11783	12315	12159	12329	12703
6.54_720.56	1_PE 17:0/17:0; iSTD	[M+H]+	YSFFAUPDXKTJMR-DIPNUNPCSA-N	720.556	ESI (+)	6.535	177705	197024	167171	158227	170168	177144	137069	166049	169166	161843	159565	170211	65007	80225	77784	85977	72925	74503	126725	126694	139103	139887	135101	140362	172154	176312	177138	180894	186819	194873
5.28_717.59	1_SM d18:1/17:0; iSTD	[M+H]+	YMQZQHIESOAPQH-JXGHDCMNSA-N	717.592	ESI (+)	5.283	1621083	1731572	1479521	1383411	1530626	1523198	1222221	1520919	1540148	1443455	1402901	1513682	742820	815178	868993	855030	827550	862286	1010947	1107597	1197967	1274510	1255483	1315285	1410358	1455077	1503538	1528475	1564686	1644471
1.14_286.27	1_Sphingosine d17:1; iSTD	[M+H]+	RBEJCQPPFCKTRZ-LHMZYYNSSA-N	286.275	ESI (+)	1.135	121940	129439	105550	100764	112518	105444	93561	117169	113454	104096	99653	105889	60235	63069	64151	66091	61351	65622	106434	96331	98893	114381	107884	114624	105118	101546	105293	110360	113062	122562
9.68_792.65_9.68_776.68_9.68_771.72	1_TG (14:0/16:1/14:0)-d5 iSTD	[M+K]+_[M+Na]+_[M+NH4]+		792.6508_776.6788_771.7243	ESI (+)	9.67867	41485.8	49352.8	41607.8	40969	40935	38916.8	39563.8	42364.8	44675.8	42786.8	41026.8	44786.8	21185	22354	23813	22730	22412	21773	39349	39823	40261	40281	39052	38400	42615.8	42156.8	41972.8	42301.8	42001.8	41349.8
11.21_890.76_11.21_874.79_11.21_869.84	1_TG d5 17:0/17:1/17:0; iSTD	[M+K]+_[M+Na]+_[M+NH4]+	OWYYELCHNALRQZ-ADIIQMQPSA-N	890.7645_874.7888_869.8363	ESI (+)	11.2143	558174	643033	563332	554828	548357	557816	732206	801032	839100	817482	756404	824096	210275	232503	211676	229576	209269	211163	365828	396284	408307	410539	385034	395762	719330	714350	714608	719632	735263	760224
6.39_546.55	1_5-PAHSA-d9; iSTD		[M-H]-	546.545	ESI (-)	6.395	106116	118208	90314	85987	98008	94797	78718	112525	98875	95677	93436	103460	71590	80397	83153	85261	86203	95162	64589	64984	65102	68951	74582	76143	97403	95125	100719	102873	105064	108774
6.09_586.50_6.09_610.54	1_Ceramide d18:1/17:0; iSTD	ICWGMOFDULMCFL-QKSCFGQVSA-N	[M+Cl]- _[M+HAc-H]-	586.4973_610.5419	ESI (-)	6.0905	2007283	2094954	1840426	1742165	1930893	1951766	1542614	1911727	1813766	1804019	1765783	1837857	1517342	1613984	1646285	1623457	1683496	1777112	1192049	1182805	1191573	1242215	1252599	1332901	1787369	1791424	1836955	1848876	1876966	1939938
0.58_339.27	1_CUDA iSTD	HPTJABJPZMULFH-UHFFFAOYSA-N	[M-H]-	339.266	ESI (-)	0.585	440939	461351	402325	399586	449258	432167	423034	496949	424469	440845	428279	438959	409300	380761	419088	421355	440545	419071	383560	371192	357327	403261	419870	408682	418157	405788	430879	429168	441704	431919
2.38_258.25	1_FA 16:0-d3; iSTD	IPCSVZSSVZVIGE-FIBGUPNXSA-N	[M-H]-	258.252	ESI (-)	2.377	866000	891566	743485	794332	813122	777442	685908	935624	771049	743107	700318	772282	640796	681792	739522	759480	810981	800016	656485	597004	635615	746740	749227	717003	724934	730410	788518	798223	810457	759977
1.88_568.36	1_LPC 17:0; iSTD	SRRQPVVYXBTRQK-XMMPIXPASA-N	[M+HAc-H]-	568.362	ESI (-)	1.877	143270	153003	126943	133674	138829	128543	113338	155491	131906	133229	119225	135904	128332	134122	145546	143872	146737	149719	120539	119552	119844	129169	135208	139398	133003	127433	135379	137416	139291	139053
1.35_464.28	1_LPE 17:1; iSTD	LNJNONCNASQZOB-HEDKFQSOSA-N	[M-H]-	464.278	ESI (-)	1.351	171925	166619	144257	149563	161528	152374	118292	162897	146319	137266	140876	158133	94916	105480	112410	117479	128013	131308	109002	116287	113094	129040	137349	139966	132079	138926	145270	150686	150016	156689
3.08_403.31	1_MAG 17:0/0:0/0:0; iSTD	SVUQHVRAGMNPLW-UHFFFAOYSA-N	[M+HAc-H]-	403.307	ESI (-)	3.078	1514111	1531015	1358340	1384946	1421001	1383231	1194973	1558677	1388613	1319208	1297454	1401154	1278401	1359324	1427850	1416683	1462287	1522399	1354951	1369935	1404018	1457706	1474346	1532878	1347371	1358311	1422714	1398647	1414522	1502897
3.57_694.47	1_PC 12:0/13:0; iSTD	FCTBVSCBBWKZML-WJOKGBTCSA-N	[M+HAc-H]-	694.466	ESI (-)	3.568	7245	8477	6872	6918	7065	6362	6292	7642	6701	6921	6685	6702	6922	7157	7065	7058	7260	7674	6604	6704	7327	7200	7277	7525	7145	6992	7107	6985	6968	7660
6.41_718.54	1_PE 17:0/17:0; iSTD	YSFFAUPDXKTJMR-DIPNUNPCSA-N	[M-H]-	718.54	ESI (-)	6.407	218661	235339	201921	227159	226872	209714	195731	246966	220766	216078	212067	234177	200283	227321	225094	254955	226791	229537	237439	223256	250141	247026	257736	247272	241418	232581	242440	248014	251737	247796
5.21_749.53	1_PG 17:0/17:0; iSTD	ZBVHXVKEMAIWQQ-QPPIDDCLSA-N	[M-H]-	749.534	ESI (-)	5.214	2964775	3154122	2685688	2764146	2937570	2868084	2299958	3054665	2684766	2668996	2576951	2805862	3327603	3415452	3699484	3780229	3823716	3825841	2060536	2029918	2180968	2276269	2299000	2370458	2730392	2763484	2839592	2888922	2893773	2942583
4.30_828.56	1_PI (15:0-18:1)-d7; iSTD?		[M-H]-	828.56	ESI (-)	4.296	7638	7478	6630	7159	7291	6310	5647	7735	6813	6859	6627	7070	8732	9230	9979	9841	9710	10137	3994	3634	4031	4175	4089	4437	6348	6800	6851	7129	7069	7121
5.21_775.60	1_SM d18:1/17:0; iSTD	YMQZQHIESOAPQH-JXGHDCMNSA-N	[M+HAc-H]-	775.597	ESI (-)	5.207	177561	192574	175726	187147	183490	173254	164307	191892	179397	180432	176040	185233	131823	138667	140096	142477	145155	138740	207891	213139	215230	215125	220331	214289	179815	181091	182580	186207	183188	180094
5.05_544.45	Ceramide d32:1;	ZKRPGPZHULJLKJ-JHRQRACZSA-N	[M+Cl]-	544.45	ESI (-)	5.055	339	422	198	230	1040	327	163	107	109	214	61	193	1134	1079	1209	1168	1006	1366	40	4	4	4	41	4	256	270	299	245	284	264
5.74_572.48_5.76_596.53	Ceramide d34:1;	YDNKGFDKKRUKPY-TURZORIXSA-N	[M+Cl]- _[M+HAc-H]-	572.4806_596.5253	ESI (-)	5.75	1778	1901	1410	1421	10438	1612	1832	1388	1397	2094	1086	1425	32706	32957	35801	35335	34677	37025	478	528	574	602	544	625	1618	1659	1697	1628	1826	1863
6.44_600.51_6.43_624.56	Ceramide d36:1;	MJQIARGPQMNBGT-WWUCIAQXSA-N	[M+Cl]-_[M+HAc-H]-	600.5118_624.5558	ESI (-)	6.4385	2031	2214	1786	1868	11532	1744	1956	1983	1795	2317	1615	1971	9912	9879	10929	10737	10189	11435	1284	1283	1248	1223	1298	1331	1779	1882	1843	2034	2038	2269
7.15_628.54_7.15_652.59	Ceramide d38:1;	XWBWIAOWSABHFI-NUKVNZTCSA-N	[M+Cl]-_[M+HAc-H]-	628.5431_652.5877	ESI (-)	7.1505	6159	7430	6416	3796	7923	9958	1395	1455	1527	2109	1576	1537	8793	8682	9590	9203	9531	10016	44.93	42.93	7.8	42.87	7.8	45.93	4501	4323	4170	4237	4506	4441
7.49_642.56_7.49_666.60	Ceramide d39:1;	WYSRACVJQVNCRW-PQPBPFPMSA-N	[M+Cl]-_[M+HAc-H]-	642.5586_666.6009	ESI (-)	7.4905	1315	933	1183	801	1458	1477	1060	1508	2044	1494	1802	1329	4333	4085	4314	4438	4570	4400	85	40.8	44.8	100.8	138	39.8	1374	2236	1923	1874	3735	3770
8.03_658.59	Ceramide d40:0;	SXPRAKSDHOEHIG-ZESVVUHVSA-N	[M+Cl]-	658.591	ESI (-)	8.032	760	637	538	384	1144	825	480	469	339	475	454	478	5114	4980	5470	5321	5277	5348	216	243	208	172	223	256	489	661	614	542	600	667
7.81_656.58_8.13_670.59	Ceramide d40:1;	KEPQASGDXIEOIL-GLQCRSEXSA-N	[M+Cl]-_[M+Cl]-	656.5755_670.5908	ESI (-)	7.9735	914	965	731	626	2302	1107	765	1003	1195	1001	1402	1121	76167	76327	82797	82982	77897	84643	157	119	59.05	102	253	188	921	1044	1104	1086	1799	2340
8.13_694.64	Ceramide d41:1;	NAJHAHQNQCNWOP-PUYNVXOJSA-N	[M+HAc-H]-	694.635	ESI (-)	8.132	164	63	132	130	543	52	283	410	477	353	474	375	17290	19622	21750	22781	22110	22753	3.71	3.71	3.71	37	3.71	90	151	408	286	329	843	755
8.64_686.62_8.64_710.67	Ceramide d42:0;	BPLYVSYSBPLDOA-WVILEFPPSA-N	[M+Cl]-_[M+HAc-H]-	686.6214_710.6653	ESI (-)	8.644	1271	1241	1080	699	2370	1512	907	932	804	637	583	876	9941	10085	10650	10771	10449	11172	404	288	170	368	257	272	1092	1010	901	981	1116	1181
8.44_684.61	Ceramide d42:1;	ZJVVOYPTFQEGPH-AUTSUKAISA-N	[M+Cl]-	684.607	ESI (-)	8.439	437	406	269	197	1451	383	621	408	572	464	459	435	150046	144854	154812	151212	149476	157931	157	152	49	57	189	174	460	383	374	384	510	695
8.65_698.62_8.65_722.67	Ceramide d43:1;	QHPYSHVSWAOLHS-PVNBSDFKSA-N	[M+Cl]-_[M+HAc-H]-	698.6214_722.6652	ESI (-)	8.6515	326	460	359	140.92	610	552	2824	3211	4352	5283	3694	3462	5728	9956	10834	10415	10350	11286	19.42	19.42	19.42	19.42	19.42	19.42	1959	1775	1932	2004	2017	2222
7.42_728.64	Cer-AP t41:0+O; Cer-AP t17:0/24:0+O;	WPOLKPIVJDIQMS-UHFFFAOYNA-N	[M+CH3COO]-	728.64	ESI (-)	7.418	580	740	452	307	623	595	2163	2622	3061	3674	2648	2313	67	4.47	4.47	89	4.47	4.47	4.47	4.47	4.47	4.47	4.47	45	6800	6708	7266	7766	7774	7275
7.73_710.63	Cer-AS d41:1+O; Cer-AS d17:1/24:0+O;	XEYLICVPLXNTEB-LAPDZXRHNA-N	[M+CH3COO]-	710.631	ESI (-)	7.734	2465	2622	1762	997	1691	2283	21504	25753	39531	43044	30799	26792	3.43	3.43	48	3.43	34	70	3.43	39	3.43	3.43	3.43	3.43	35257	37988	40449	41131	41160	41982
0.99_199.17	FA 12:0; (lauric acid)	POULHZVOKOAJMA-UHFFFAOYSA-N	[M-H]-	199.171	ESI (-)	0.994	51445	21126	21441	21645	26805	27510	38692	38425	86277	25360	19420	42734	14461	19573	17052	18731	19863	22376	17390	10032	5912	9257	10397	10716	27927	30535	34708	35657	34971	37455
1.22_213.19	FA 13:0; (tridecylic acid)	SZHOJFHSIKHZHA-UHFFFAOYSA-N	[M-H]-	213.186	ESI (-)	1.221	4922	5590	5869	4290	7152	27276	6241	10538	6262	3836	9753	7546	2159	1764	1537	1807	1863	2260	1429	1065	1343	1420	1088	1323	2551	2808	2495	2739	2945	2901
1.54_227.20	FA 14:0; (myristic acid)	TUNFSRHWOTWDNC-UHFFFAOYSA-N	[M-H]-	227.202	ESI (-)	1.544	92394	75752	113497	64310	77346	203226	79104	105966	98940	60163	140408	97544	99313	100543	99029	102183	104224	116224	24820	20862	17166	21394	19713	20565	50096	54293	53393	55367	65668	70039
1.13_225.19	FA 14:1; (physeteric acid)	AFGUVBVUFZMJMX-KTKRTIGZSA-N	[M-H]-	225.186	ESI (-)	1.134	2366	2608	1723	1450	2177	2672	2255	2101	2659	2844	2938	3384	4864	4989	5778	5834	5937	5324	256	269	273	274	233	237	4604	4357	4519	4911	5006	5064
1.93_241.22	FA 15:0; (pentadecylic acid)	WQEPLUUGTLDZJY-UHFFFAOYSA-N	[M-H]-	241.218	ESI (-)	1.93	45265	44028	74019	40804	41682	126315	34395	58530	33802	23289	88096	49327	26348	28445	24398	31044	30567	31340	11925	10281	9651	11508	11606	11152	18632	19090	19348	19181	23478	22485
1.46_239.20	FA 15:1;	DJCQJZKZUCHHAL-VOTSOKGWSA-N	[M-H]-	239.202	ESI (-)	1.46	19786	19856	8169	7325	9417	15001	9175	8207	9666	12343	11584	13460	1027	992	1074	989	1075	1237	413	465	516	400	376	365	18687	18946	19321	19836	19280	20996
1.72_253.22	FA 16:1; (palmitoleic acid)	SECPZKHBENQXJG-FPLPWBNLSA-N	[M-H]-	253.218	ESI (-)	1.723	36231	45369	36599	38071	49595	67687	42151	41043	48533	64766	60820	90177	150358	157407	179446	174998	173868	177140	3357	2704	2546	2674	1861	2088	51813	53191	55944	56607	57279	57629
2.23_267.23	FA 17:1;	QSBYPNXLFMSGKH-HJWRWDBZSA-N	[M-H]-	267.233	ESI (-)	2.231	532625	577843	391352	380097	455644	835272	306043	326106	379155	434709	438949	489378	2812	2979	3301	3423	4062	3884	1345	1879	1663	1555	1630	1587	416887	425914	457191	457760	453306	454349
2.60_281.25	FA 18:1; (oleic acid)	ZQPPMHVWECSIRJ-KTKRTIGZSA-N	[M-H]-	281.249	ESI (-)	2.595	377902	514998	307392	289309	520585	483695	426416	373840	347960	687053	428270	557652	3985718	3802292	4276220	4288900	4342764	4430368	120605	89703	80087	97776	70588	69380	454411	395689	425136	436702	447081	442758
1.96_279.23	FA 18:2; (linoleic acid)	JBYXPOFIGCOSSB-XBLVEGMJSA-N	[M-H]-	279.233	ESI (-)	1.962	133555	154866	72429	66685	200903	145595	186604	138873	160979	221227	214032	290951	3655083	3791520	4111681	4211793	4102623	4357212	7964	8426	6032	7113	5159	5825	236690	246492	252969	258428	257303	275969
1.53_277.22	FA 18:3; (linolenic acid)	DTOSIQBPPRVQHS-PDBXOOCHSA-N	[M-H]-	277.217	ESI (-)	1.529	131158	137842	78933	76334	110191	177230	43530	36040	42371	51068	61608	73408	157234	168195	190347	189558	183963	193813	262	390	195	272	279	249	61010	66985	68320	67645	70076	69949
1.19_275.20	FA 18:4;	JIWBIWFOSCKQMA-LTKCOYKYSA-N	[M-H]-	275.202	ESI (-)	1.194	121414	119173	82487	76302	109996	175806	14687	11847	14539	17915	21603	24732	3801	3652	3894	4268	3880	4067	76	125	80	212	122	66	39451	41021	42902	44507	45099	46413
3.09_295.26	FA 19:1;	YOKHLRHWEXTWJR-KHPPLWFESA-N	[M-H]-	295.265	ESI (-)	3.086	746800	802644	364696	328365	377054	731516	339734	312968	362892	467955	452920	540414	4747	4209	4539	4657	4765	5280	898	930	756	870	765	1165	360392	360550	359586	370087	363808	395828
3.27_309.28	FA 20:1; (eicosenoic acid)	BITHHVVYSMSWAG-KTKRTIGZSA-N	[M-H]-	309.28	ESI (-)	3.273	27744	35383	15583	14039	33951	24837	12961	12222	11328	23676	13878	17853	45489	46135	50721	49142	52653	50887	4491	2536	2193	2351	2283	2068	16983	15562	16535	16504	16960	16124
2.82_307.26	FA 20:2; (eicosadienoic acid)	XSXIVVZCUAHUJO-HZJYTTRNSA-N	[M-H]-	307.264	ESI (-)	2.822	13787	15777	5555	5265	7814	11454	7125	5664	6640	8367	10232	12154	27799	28869	29225	29819	29508	31783	397	308	205	153	201	186	12536	12703	12768	12564	13199	13844
2.40_305.25	FA 20:3; (eicosatrienoic acid)	AHANXAKGNAKFSK-PDBXOOCHSA-N	[M-H]-	305.248	ESI (-)	2.4	1860	2401	1128	1053	2557	2104	1783	1097	1132	1881	1326	1527	13368	13493	14975	14854	15227	16269	292	340	178	335	230	257	1684	1377	1579	1448	1536	1657
2.25_305.25	FA 20:3; (homo-gamma-linolenic acid)	HOBAELRKJCKHQD-QNEBEIHSSA-N	[M-H]-	305.249	ESI (-)	2.253	134038	154122	60713	69181	95477	176758	104316	81459	105297	131677	140713	172525	87123	89433	99298	100870	97468	96475	270	336	203	202	310	257	82583	84986	89645	90659	91542	86284
1.83_303.23	FA 20:4; (arachidonic acid)	YZXBAPSDXZZRGB-DOFZRALJSA-N	[M-H]-	303.233	ESI (-)	1.832	90002	103190	44660	39098	63054	100138	57714	39107	49441	71956	70488	79769	795001	783899	816340	833313	810564	883290	594	367	412	433	337	502	69361	65548	66326	66155	67971	74047
1.41_301.22	FA 20:5; (eicosapentaenoic acid)	JAZBEHYOTPTENJ-JLNKQSITSA-N	[M-H]-	301.218	ESI (-)	1.412	1511414	1491592	850067	734210	1181945	1955609	941246	602413	750454	900949	1382366	1395841	43879	46524	49866	50246	49240	52027	273	498	529	617	616	811	934431	953079	996002	1017660	1012986	1065861
3.40_335.30	FA 22:2; (docosadienoic acid)	HVGRZDASOHMCSK-AVQMFFATSA-N	[M-H]-	335.295	ESI (-)	3.404	430	460	272	188	1738	322	482	282	480	465	653	279	1596	1531	1710	1730	1706	1611	326	189	241	115	372	188	697	584	672	607	533	620
1.62_327.23	FA 22:6; (docosahexaenoic acid)	MBMBGCFOFBJSGT-KUBAVDMBSA-N	[M-H]-	327.233	ESI (-)	1.625	296	650	200	386	1989	266	492	256	393	2606	703	308	126720	134792	150925	154418	150779	154210	108	140	79	122	151	30	1828	1766	2070	1962	1991	1953
0.56_143.11	FA 8:0; (caprylic acid)	WWZKQHOCKIZLMA-UHFFFAOYSA-N	[M-H]-	143.107	ESI (-)	0.563	1459	1302	1282	1266	1525	1721	1122	1455	1579	1399	1407	1880	2053	2404	2295	1998	1691	1842	1183	1098	1277	1230	1197	1554	1647	1931	1687	1734	1777	2019
1.51_554.35	LPC 16:0;	ASWBNKHCZGQVJV-HSZRJFAPSA-N	[M+HAc-H]-	554.346	ESI (-)	1.509	2228	3072	2446	1871	2638	2496	4298	3332	4173	6136	5625	5850	782453	802292	852860	845531	832595	889219	194	198	126	78	45	169	5290	4846	5354	5374	5261	5743
1.09_552.33	LPC 16:1;	LFUDDCMNKWEORN-ZXEGGCGDSA-N	[M+HAc-H]-	552.33	ESI (-)	1.092	591	639	763	647	1088	1066	1184	1060	1190	1461	1330	1575	6285	6658	7174	7584	7363	7669	7.05	7.05	7.05	7.05	7.05	70	810	805	865	927	971	923
2.12_582.38	LPC 18:0; A	IHNKQIMGVNPMTC-RUZDIDTESA-N	[M+HAc-H]-	582.376	ESI (-)	2.12	1366	1884	1093	1007	802	1417	348	229	351	494	359	485	20300	19259	23198	22398	23974	22480	3.35	3.35	34	36	3.35	3.35	441	384	456	533	477	542
2.31_582.38	LPC 18:0; B	IHNKQIMGVNPMTC-RUZDIDTESA-N	[M+HAc-H]-	582.378	ESI (-)	2.311	3471	4617	3094	2283	2863	3598	3477	2508	3542	4306	5000	4757	361167	350978	399856	406282	397226	379710	139	155	159	72	100	107	3700	3367	3540	3849	3557	3516
1.65_580.36	LPC 18:1;	YAMUFBLWGFFICM-PTGWMXDISA-N	[M+HAc-H]-	580.362	ESI (-)	1.649	4507	5349	3881	3080	3928	4977	9254	6867	9545	11494	11462	12503	106776	106578	113908	113150	109121	118691	3.09	3.09	3.09	31	32	3.09	7136	6802	6854	6896	6599	7251
1.24_578.35	LPC 18:2;	SPJFYYJXNPEZDW-FTJOPAKQSA-N	[M+HAc-H]-	578.347	ESI (-)	1.241	1809	2019	1186	1020	1235	1655	4457	3532	4816	5611	5264	5766	133464	139016	152946	155675	150743	162280	34	3.37	52	3.37	3.37	43	4833	4766	5018	5260	5320	5641
1.44_604.36	LPC 20:3;	BBNHCUBQEQJHIG-FZZJNMCHSA-N	[M+HAc-H]-	604.361	ESI (-)	1.44	1558	1750	1025	896	1048	1463	2583	2123	3021	3391	3137	3192	7643	8552	9073	9033	8411	9513	3.45	35	64	3.45	3.45	40	1636	1616	1670	1613	1583	1663
1.53_452.28	LPE 16:0;	CKPBBEOJHAPPBT-HXUWFJFHSA-N	[M-H]-	452.278	ESI (-)	1.533	9595	9685	13491	8658	9819	13613	31287	24287	26597	35770	38414	31347	18794	19448	21163	23124	22793	24241	64	108	126	181	144	167	24723	23600	24233	24340	25698	27875
1.26_476.28	LPE 18:2;	DBHKHNGBVGWQJE-USWSLJGRSA-N	[M-H]-	476.278	ESI (-)	1.259	1580	1653	1276	959	1077	1522	3642	3415	3409	4435	4394	5612	12223	12344	13468	13341	14305	15024	3.15	3.15	33	3.15	82	32	3227	3242	3158	3661	3689	3897
1.23_500.28	LPE 20:4;	JPNPIRVRGLGTRE-YSKCIPFOSA-N	[M-H]-	500.278	ESI (-)	1.229	304	311	127	208	280	347	599	401	526	863	611	856	8388	8365	10280	10450	10600	10597	2.49	40	2.49	2.49	2.49	2.49	518	471	395	586	582	496
5.60_792.58	PC 32:0;	KILNVBDSWZSGLL-KXQOOQHDSA-N	[M+HAc-H]-	792.575	ESI (-)	5.601	2175	2121	2676	2054	2354	2480	1471	1699	1694	2084	1778	1799	37818	35649	37825	38035	37518	38515	3.58	36	101	60	3.58	3.58	6051	5503	5662	5418	5643	5474
5.03_790.56	PC 32:1;	QIBZFHLFHCIUOT-NPBIGWJUSA-N	[M+HAc-H]-	790.56	ESI (-)	5.032	4817	5723	8189	5995	5793	7166	17732	19449	22465	24398	22662	22752	17115	15213	16878	16743	15657	16425	36	37	39	3.65	3.65	48	21417	19923	20070	20169	20145	20240
4.55_788.54	PC 32:2;	GPWHCUUIQMGELX-VHQDNGOZSA-N	[M+HAc-H]-	788.543	ESI (-)	4.554	2261	2747	3045	2180	2395	2772	3155	3360	3382	3802	3259	3215	9052	9067	9449	9584	9331	9775	51	3.99	40	3.99	42	3.99	3912	4015	3597	3608	3773	4145
5.35_804.57	PC 33:1;	GXTATYLPYLLNLV-MGIDVFSBSA-N	[M+HAc-H]-	804.574	ESI (-)	5.351	1945	1480	3077	2264	2393	2761	965	1139	1313	1254	1454	1357	3431	3096	3452	3548	3492	3479	4.02	40	40	4.02	4.02	4.02	1563	1614	1757	1367	1739	1959
4.88_802.56	PC 33:2;	SBNDHGBVMZMSNL-UESLNCBNSA-N	[M+HAc-H]-	802.56	ESI (-)	4.88	12622	15437	23836	15123	20815	26440	9324	10181	11521	13601	12325	10993	5596	5432	5672	5429	5892	5706	3.59	3.59	36	3.59	3.59	3.59	15061	15056	15898	16214	14985	14682
6.27_820.61	PC 34:0;	PZNPLUBHRSSFHT-RRHRGVEJSA-N	[M+HAc-H]-	820.608	ESI (-)	6.274	6.37	795	1093	506	1131	6.37	1153	2443	743	6.37	584	514	9462	9015	9300	9472	9433	9189	6.37	113	6.37	105	64	164	3210	3640	4339	4172	3947	4676
5.67_818.59	PC 34:1;	WTJKGGKOPKCXLL-VYOBOKEXSA-N	[M+HAc-H]-	818.592	ESI (-)	5.672	6973	8672	13337	9937	10185	10934	14936	16204	18986	19812	19671	19758	296477	297847	305065	311520	304998	307862	93	48	45	117	72	44	18202	17839	18076	18533	17722	18422
5.16_816.58	PC 34:2;	JLPULHDHAOZNQI-ZTIMHPMXSA-N	[M+HAc-H]-	816.577	ESI (-)	5.159	4318	5156	6469	4260	4792	5752	10577	10990	12911	13427	12927	12855	594182	604054	627297	632712	618800	621014	387	182	209	207	253	185	12053	11762	11701	11283	11948	11800
4.73_814.56	PC 34:3;	CNNSEHUKQJCGTE-UPPWDXJYSA-N	[M+HAc-H]-	814.559	ESI (-)	4.734	5915	7313	8714	5537	6330	7625	3664	3872	3994	4419	4478	3979	14607	14361	15005	15314	14578	14994	5.49	5.49	5.49	5.49	55	5.49	5642	5344	5725	5533	5224	5471
4.45_812.54	PC 34:4;	YWDDIWXKFJEMKF-JTZVLWBESA-N	[M+HAc-H]-	812.543	ESI (-)	4.447	3236	4097	5554	3623	4151	4886	2807	2787	2808	3703	3209	2935	3423	3465	3513	3597	3346	3546	50	4.06	41	4.06	4.06	54	6139	5878	6070	6445	6187	6537
6.01_832.61	PC 35:1;	MFHIZGSSDZJFKD-IYEJTHTFSA-N	[M+HAc-H]-	832.606	ESI (-)	6.008	3505	2279	5065	3575	4394	4807	1416	1757	1589	1669	1824	1620	4757	4663	4678	4758	4451	4721	39	33	3.35	3.35	3.35	3.35	1665	1813	1667	1886	2009	2276
5.50_830.59	PC 35:2;	ZSKWZJYUVZYDQU-WESJWMGVSA-N	[M+HAc-H]-	830.592	ESI (-)	5.495	65457	74798	95048	66078	83658	99299	65691	73178	82352	90136	84163	78246	15641	14918	15554	15293	14801	15460	3.98	41	3.98	40	91	105	73805	72535	72822	74308	71262	75420
4.76_826.56	PC 35:4;	LYNZMLHNPYEREG-ZHMZGHMTSA-N	[M+HAc-H]-	826.56	ESI (-)	4.756	3496	3154	5735	4268	4579	5119	2227	3227	3343	3243	3414	2776	8498	8215	8434	8269	7929	8346	38	3.43	42	3.43	3.43	34	4124	4847	4556	4417	6676	5669
6.32_846.62	PC 36:1;	ATHVAWFAEPLPPQ-VRDBWYNSSA-N	[M+HAc-H]-	846.624	ESI (-)	6.315	12174	14610	15272	10567	13646	16673	10438	11552	13301	14715	14683	14609	81816	79770	86875	85898	84823	84223	3.9	3.9	39	3.9	3.9	3.9	10929	10455	10851	11456	10828	11012
5.82_844.61	PC 36:2;	SNKAWJBJQDLSFF-NVKMUCNASA-N	[M+HAc-H]-	844.608	ESI (-)	5.821	11117	12295	11599	8198	10539	12956	8551	9149	9925	11383	9520	9246	424018	417827	432550	429360	426501	434389	37	40	102	51	40	53	10926	10100	10459	10233	10254	11052
5.22_842.59	PC 36:3; A	YPAZQMWFRMHBBM-CLKMJQEKSA-N	[M+HAc-H]-	842.591	ESI (-)	5.216	5009	6637	5193	2995	4535	5896	10371	10666	12956	15310	13690	12784	65269	62463	64963	67636	66442	66901	2.96	2.96	49	30	30	41	16032	15640	15988	15283	15500	15877
5.34_842.59	PC 36:3; B	YPAZQMWFRMHBBM-CLKMJQEKSA-N	[M+HAc-H]-	842.592	ESI (-)	5.34	6348	7274	6968	4689	5904	7072	7320	7235	8452	8753	8454	9082	151866	152670	160875	158988	152371	158285	250.27	250.27	250.27	250.27	250.27	250.27	6539	6646	6837	6520	6981	6607
4.79_840.57	PC 36:4; A	IIZPXYDJLKNOIY-JXPKJXOSSA-N	[M+HAc-H]-	840.575	ESI (-)	4.791	13062	16303	14157	9178	12240	14499	10025	10466	11618	13094	11847	11455	82343	83376	89278	88738	85409	88094	38	3.48	3.48	39	56	35	20948	21381	21212	20870	20589	21081
5.06_840.58	PC 36:4; B	IIZPXYDJLKNOIY-JXPKJXOSSA-N	[M+HAc-H]-	840.577	ESI (-)	5.062	4199	4843	5185	3563	4222	5052	4016	3920	5011	5523	4697	4892	353825	352556	364959	371966	357745	366523	64	41	4.05	42	42	42	5528	5198	5356	5337	5590	5580
4.43_838.56	PC 36:5; A	DYDDZDMJSQYFGN-OIVUZXIWSA-N	[M+HAc-H]-	838.559	ESI (-)	4.426	9851	11739	13141	8575	11131	11190	7574	7900	8856	10454	9256	8691	794	913	960	868	843	833	3.68	37	3.68	49	3.68	3.68	11803	11108	11464	11595	10933	12064
4.66_838.56	PC 36:5; B	DYDDZDMJSQYFGN-OIVUZXIWSA-N	[M+HAc-H]-	838.561	ESI (-)	4.66	29853	35092	38591	25477	28954	34425	63276	68697	74345	78609	82042	85201	28337	26953	28232	27998	27755	28943	4.1	59	63	96	41	70	74185	73960	74285	74729	74091	78338
6.15_858.62	PC 37:2;	MCZUABDVGPPWPM-HJTCUGKVSA-N	[M+HAc-H]-	858.622	ESI (-)	6.148	26303	30059	30133	20439	29034	33667	21520	24995	28536	32023	31225	28965	2552	2558	2506	2538	2531	2361	3.18	51	32	41	35	66	24738	24589	24782	24326	25121	24604
5.39_854.59	PC 37:4;	QRPUCJXFPYFTMB-FBFLODOBSA-N	[M+HAc-H]-	854.59	ESI (-)	5.391	1917	1908	1549	1591	1871	1830	1470	1714	1846	1828	1964	1856	7685	7474	7399	7362	7640	7745	200	71	209	174	115	111	1363	1525	1403	1627	1880	1890
6.41_872.64	PC 38:2;	KXXLFCAPKGRXBT-FMJYHZMHSA-N	[M+HAc-H]-	872.638	ESI (-)	6.414	1626	3669	2901	1038	2901	3454	1190	564	701	1690	697	632	8681	7642	8577	8335	8252	8200	44	45	25	53	72	82	2076	2154	1216	2047	944	917
5.99_870.62	PC 38:3;	OJHJKEBRZSDTTL-VHWCKNCUSA-N	[M+HAc-H]-	870.622	ESI (-)	5.994	6147	7672	5308	3569	5276	6087	4763	4624	5529	5922	5615	5575	83736	82808	86640	86105	85572	86766	68	61	64	56	50	51	3622	3413	3579	3525	3503	3590
5.71_868.61	PC 38:4; A	PSVRFUPOQYJOOZ-QNPWAGBNSA-N	[M+HAc-H]-	868.608	ESI (-)	5.714	3101	3813	2483	1653	2327	2764	2408	2231	3060	3357	2589	2591	184826	187829	202946	200913	196754	197477	3.85	41	3.85	3.85	39	3.85	2575	2524	2612	2652	2639	2603
5.11_866.59	PC 38:5; A	YLWBKBDNHWQEFU-YJXJLLHLSA-N	[M+HAc-H]-	866.591	ESI (-)	5.108	6024	7525	5870	3842	5565	5968	7105	7220	9021	10251	8460	7926	42676	43191	44017	45175	43881	45059	3.23	3.23	3.23	3.23	32	48	7743	7243	7936	8116	7521	7690
5.28_866.59	PC 38:5; B	YLWBKBDNHWQEFU-YJXJLLHLSA-N	[M+HAc-H]-	866.591	ESI (-)	5.284	37987	43408	28070	18299	26679	32162	29497	33288	34330	35875	39457	39169	17574	17263	17973	18267	18204	17984	76	47	33	39	75	65	25221	25938	25971	26489	26342	26351
5.94_894.62	PC 40:5; B	LJFKFKIYUJNFPZ-ZLFSCUDPSA-N	[M+HAc-H]-	894.623	ESI (-)	5.936	1833	2111	1201	846	1200	1276	1651	1723	1872	2140	2095	1925	6377	6350	6726	6637	6241	6403	3.66	3.66	3.66	3.66	3.66	37	1335	1484	1491	1310	1212	1321
5.30_892.61	PC 40:6; A	FYVNIFOYDIIODX-KNKJIUSSSA-N	[M+HAc-H]-	892.606	ESI (-)	5.302	2396	2711	1424	1074	1742	1788	1377	1343	1351	1640	1587	1567	309	951	869	903	885	931	2.69	2.69	2.69	2.69	39	27	1394	1297	1273	1326	1255	1255
4.53_888.57	PC 40:8;	BFCSBEFTXQRIOJ-IMYLGOOQSA-N	[M+HAc-H]-	888.573	ESI (-)	4.526	1611	1731	1293	908	1110	1573	1693	1724	1916	1987	1584	1826	2461	2412	2487	2727	2634	2479	32.85	32.85	32.85	32.85	32.85	32.85	1868	1800	1756	1698	1874	1825
6.22_830.63	PC p-36:1; or PC o-36:2;	ZOTYCHIFTCFAHC-KOUVQCMKSA-N	[M+HAc-H]-	830.633	ESI (-)	6.221	3691	4352	2508	1761	2828	3295	3263	3278	3664	4146	3882	3582	5404	5306	5709	5731	5365	5855	3.52	3.52	3.52	35	3.52	40	3849	3816	4111	3963	4181	3881
5.99_852.61	PC p-38:4; or PC o-38:5; B	DBQMOXDLWKVKKG-REWQMPQJSA-N	[M+HAc-H]-	852.611	ESI (-)	5.986	578	1056	201	310	365	572	183	159	142	226	119	228	6598	6317	6587	6642	7000	7144	42	3.15	3.15	3.15	56	3.15	222	167	231	100	112	187
5.97_704.52	PE 33:0; PE 15:0-18:0;	OZKFXEPRCADVOK-UHFFFAOYNA-N	[M-H]-	704.523	ESI (-)	5.973	3052	3687	2957	2322	2624	3478	19060	21060	25303	27274	28392	27679	2.51	25	38	2.51	2.51	27	2.51	2.51	78	94	2.51	2.51	13706	13506	14550	14455	14594	14632
5.37_702.51	PE 33:1; PE 15:0-18:1;	ADCNXGARWPJRBV-ZCXUNETKNA-N	[M-H]-	702.507	ESI (-)	5.367	1339	1690	1990	1282	1491	1846	13703	15237	16816	18059	21296	21105	46	27	23	52	21	65	2.09	2.09	40	34	2.09	51	9925	9969	10299	10065	10437	9668
5.58_702.51	PE 33:1; PE 16:0-17:1;	CBDUTJYWWDMHBN-ICFOKQHNNA-N	[M-H]-	702.508	ESI (-)	5.581	130197	154742	214009	145581	196280	250239	132338	154467	156510	169029	180679	169184	29	381	417	954	514	786	39	412	669	971	460	1010	281400	279526	294049	296973	294271	292752
5.01_700.49	PE 33:2; PE 16:1-17:1;	WRAPIMBVEFZRSV-RYOQUFEFNA-N	[M-H]-	700.492	ESI (-)	5.007	8888	10585	15960	11518	15011	18960	19587	24304	23764	27478	28258	25007	41	101	171	185	44	124	92	239	219	127	72	147	18784	18387	19893	19793	19686	19433
5.81_716.52	PE 34:1;	FHQVHHIBKUMWTI-OTMQOFQLSA-N	[M-H]-	716.524	ESI (-)	5.806	96554	109692	142612	91058	114612	146846	141604	154796	176156	188302	205337	198448	7437	8053	8714	8991	8581	9144	20.99	210	366	464	315	514	163324	164805	170165	171726	171503	175912
6.25_702.54	PE 34:1e; PE 18:0e/16:1;	RXOCXJHJEHMYBD-PEZBUJJGNA-N	[M-H]-	702.544	ESI (-)	6.249	7258	8683	7573	5391	7594	9895	15457	17148	18785	20557	22725	22093	1016	1026	969	1148	1124	1060	4.11	4.11	4.11	41	4.11	4.11	14205	13980	14518	15153	14974	14125
5.30_714.51	PE 34:2;	HBZNVZIRJWODIB-NHCUFCNUSA-N	[M-H]-	714.509	ESI (-)	5.296	23735	30506	31381	16334	25814	38614	85502	96902	106309	116875	120464	110123	10649	10021	11527	11463	10939	11238	71	230	249	223	210	291	84188	88597	91633	91768	93975	94020
4.96_712.49	PE 34:3; PE 16:0-18:3;	QONZHKTZKTUIMU-SVNQLWEDNA-N	[M-H]-	712.492	ESI (-)	4.957	5222	6063	11592	7051	8217	11468	15890	16869	17540	21645	20216	18045	119	678	705	887	637	770	6.2	6.2	6.2	62	6.2	103	25282	25348	23810	24826	25904	26526
6.64_732.55	PE 35:0; PE 17:0-18:0;	AJNYYCRNVNEGMQ-UHFFFAOYNA-N	[M-H]-	732.554	ESI (-)	6.643	2969	3494	2030	1368	2045	2440	7184	8169	9176	10367	10270	10233	42	32	98	56	3.16	57	3.16	47	3.16	3.16	3.16	96	5218	5574	5642	5528	5914	5584
6.02_730.54	PE 35:1; PE 17:0-18:1;	UAKUCJGIIYSFFK-ZPHPHTNENA-N	[M-H]-	730.539	ESI (-)	6.02	10880	13033	11271	7599	8893	10922	24890	27214	30875	33574	38429	36179	4.36	68	159	4.36	62	263	4.36	44	96	60	147	129	25871	26613	26754	26886	26798	27712
6.25_730.54	PE 35:1; PE 18:0-17:1;	CSGIGSOZYMYFOM-VLGSPTGONA-N	[M-H]-	730.539	ESI (-)	6.252	352340	416365	398521	249788	382492	498030	252787	292881	289309	329806	319938	299568	185	534	705	991	754	1022	43	469	588	703	623	1052	298653	293760	301682	307874	306616	311396
6.70_716.56	PE 35:1e; PE 18:0e/17:1;	RJBHVWOPVMCDCE-VLGSPTGONA-N	[M-H]-	716.56	ESI (-)	6.698	72694	88676	58461	34834	59758	79967	113888	127023	136644	153962	153261	142398	42	176	164	236	219	268	42	67	162	263	213	367	118359	116723	119609	124300	120424	125519
5.62_728.52	PE 35:2; PE 17:1-18:1;	MLYDZMPNTAJTBN-YGGBKCGDNA-N	[M-H]-	728.524	ESI (-)	5.622	127215	142413	186760	115290	168323	214612	88548	97218	104477	116148	125650	117414	430	570	672	711	690	774	74	290	168	266	254	463	101424	103065	102844	104440	106367	110339
6.59_714.55	PE 35:2e; PE 18:1e/17:1;	JVHDZTSXUITLTB-YGGBKCGDNA-N	[M-H]-	714.545	ESI (-)	6.586	316931	376118	264768	161598	273466	364973	106464	121148	131931	139811	147014	139268	18.77	188	219	414	388	401	18.77	246	266	464	333	397	208347	214318	218562	221964	221252	225371
5.15_726.51	PE 35:3; PE 17:1-18:2;	HAJJFLNUKSWRNU-DAWNVERKNA-N	[M-H]-	726.508	ESI (-)	5.148	14218	17981	16735	9878	14642	20672	31070	35922	36276	43168	38722	35650	86	91	61	129	243	41	36	108	46	80	193	90	36851	36177	37387	36237	37018	39838
4.80_724.49	PE 35:4; PE 17:1-18:3;	INULJJWWIZWSAV-PPEBMUNXNA-N	[M-H]-	724.491	ESI (-)	4.798	4672	5863	7355	5111	6452	8539	11683	13309	14639	17276	13938	12261	370	49	62	367	23	68	2.31	2.31	58	2.31	46	41	10240	9386	10187	10072	10118	9832
4.40_722.48	PE 35:5; PE 15:0-20:5;	RAJRALIPDBBWPS-PARIFVSLNA-N	[M-H]-	722.476	ESI (-)	4.398	4050	4953	5853	3784	4925	6685	11433	12794	14145	17334	14233	13551	86	98	77	126	206	188	3.52	51	35	53	39	66	8955	8538	8418	8522	8475	8878
7.07_746.57	PE 36:0; PE 17:0-19:0;	MHPJAAPARCASFP-UHFFFAOYNA-N	[M-H]-	746.569	ESI (-)	7.071	6755	7912	6059	4558	6430	7669	3883	4374	4261	4840	5122	4798	1571	1726	1634	1861	1681	1891	1649	1747	1888	1769	1691	1793	6021	5123	5318	5471	5312	5634
5.66_744.55	PE 36:1;	JQKOHRZNEOQNJE-ZZEZOPTASA-N	[M-H]-	744.554	ESI (-)	5.664	2725	2433	2733	2296	2654	2901	1286	1372	1457	1655	1563	1579	17185	17576	17712	18032	17808	18060	3.78	3.78	3.78	3.78	3.78	38	1711	1803	1538	1637	1573	1776
6.90_730.58	PE 36:1e; PE 18:0e/18:1;	CEVVUBCHWNKKNN-ZZEZOPTANA-N	[M-H]-	730.576	ESI (-)	6.903	115463	141214	80203	47869	82989	109318	274111	314472	346317	387643	411040	379752	146	632	1051	978	1048	990	14.56	264	382	324	342	529	229467	226641	240210	240910	236502	246226
5.95_742.54	PE 36:2;	MWRBNPKJOOWZPW-CLFAGFIQSA-N	[M-H]-	742.54	ESI (-)	5.953	75054	94402	63595	39841	66640	87749	120638	138256	143599	153768	153242	145135	24476	23102	26230	26874	25230	24873	78	279	220	233	225	302	120507	114751	126272	124773	127174	122526
5.81_742.54	PE 36:2; PE 18:1-18:1;	MWRBNPKJOOWZPW-CLFAGFIQNA-N	[M-H]-	742.539	ESI (-)	5.814	80295	101048	104173	66241	94860	125278	37860	43466	45148	49382	64809	62880	3391	3700	4430	4300	3865	4120	47	171	186	47	194	313	44940	43678	47322	47303	46452	47278
6.39_728.56	PE 36:2e; PE 18:0e/18:2;	WQEICMLVSDZVOZ-MLWYYCKJNA-N	[M-H]-	728.561	ESI (-)	6.387	23153	28463	14928	10202	15824	20044	133858	146251	164328	174737	172924	167213	812	931	986	1127	1084	1195	32	215	170	213	157	270	136244	133974	135278	138556	138395	140107
5.47_740.52	PE 36:3;	DOILLFCKSSPXMF-ZKZIFNJMSA-N	[M-H]-	740.523	ESI (-)	5.47	29882	38944	28425	17468	25735	37167	26028	30030	33017	36964	34764	32544	1249	1725	2017	2183	1915	1948	36	59	43	52	51	153	21031	21413	22856	21661	21985	21550
5.60_740.52	PE 36:3; PE 18:0-18:3;	DCPDPBCUPLKQNQ-HLMRNWPHNA-N	[M-H]-	740.523	ESI (-)	5.602	10522	12867	15034	10167	14132	18519	20517	21743	22333	26122	24563	23090	207	432	395	361	315	513	3.9	3.9	39	3.9	69	94	21819	21255	21654	21646	21944	21973
5.02_738.51	PE 36:4; PE 16:0-20:4;	NQIMLWFRWGTTOZ-JAXHXWBXNA-N	[M-H]-	738.508	ESI (-)	5.018	19903	23085	25393	16436	21215	28632	46944	52487	57109	62817	65345	61999	233	194	276	229	273	284	4.13	44	49	86	41	90	32839	34670	34247	35397	34883	36321
5.90_724.53	PE 36:4e; PE 18:1e/18:3;	MZVVECFOMNGMBI-XEKZTXPJNA-N	[M-H]-	724.527	ESI (-)	5.9	5299	5096	5814	4285	6428	7949	5300	5363	6448	6992	6654	6433	203	349	378	407	435	593	40	4.02	4.02	4.02	4.02	4.02	9318	9536	9554	9884	10125	9448
4.77_736.49	PE 36:5; PE 16:0-20:5;	KHLRCNXJXSYNCK-LPHKCNJWNA-N	[M-H]-	736.492	ESI (-)	4.769	150327	193803	247580	153104	221847	293101	185533	231575	257175	287253	261946	249140	456	736	763	1221	917	973	26.65	267	435	424	410	591	306282	307037	324356	328614	327024	327835
6.91_758.57	PE 37:1; PE 18:0-19:1;	AHZWSXIVPHUMBV-VZCXRCSSNA-N	[M-H]-	758.571	ESI (-)	6.914	83804	102344	76861	43772	72828	101625	50148	55389	63714	73764	69272	61480	62	76	3.78	110	104	123	3.78	67	102	71	38	290	61535	60110	61360	62085	63423	65323
7.36_744.59	PE 37:1e; PE 18:0e/19:1;	RNGJRWGXYOGDBW-VZCXRCSSNA-N	[M-H]-	744.591	ESI (-)	7.355	10607	13305	6772	4211	7806	10151	22898	26988	29906	32503	34179	31320	3.92	55	39	80	40	82	3.92	3.92	3.92	48	3.92	3.92	20360	19749	22078	21133	20743	21253
6.28_756.55	PE 37:2; PE 18:1-19:1;	VYGBMMLRWMCCRC-AUYXYSRINA-N	[M-H]-	756.555	ESI (-)	6.276	98288	111528	96420	58993	91800	120557	37233	42364	43761	51658	57646	52669	1249	1003	1207	1085	1346	1079	249	315	275	366	246	422	47980	47675	48090	48445	49210	50992
7.24_742.58	PE 37:2e; PE 18:1e/19:1;	SGQUEMOCROIZTH-AUYXYSRINA-N	[M-H]-	742.575	ESI (-)	7.237	43520	53920	28361	17038	31326	44238	19404	22558	25483	26837	27917	27006	3.66	3.66	3.66	43	3.66	68	41	37	58	42	39	50	29375	30077	31508	31716	31454	31338
6.71_742.58	PE 37:2e; PE 19:1e/18:1;	JHATWKNIBFNGNV-RBUFKYLENA-N	[M-H]-	742.575	ESI (-)	6.709	25165	30923	16521	9960	16246	21474	17821	20170	22018	23659	27027	25341	4.57	4.57	4.57	70	88	46	4.57	77	4.57	46	49	77	22464	22907	23960	23502	23392	23976
5.79_754.54	PE 37:3; PE 19:1-18:2;	QXCGZZUAHLWWCF-ATEMJZPONA-N	[M-H]-	754.539	ESI (-)	5.786	20366	23410	15409	10040	15042	19376	18633	20520	21276	24211	22156	20844	528	601	468	640	512	669	98	439	395	152	279	380	22871	22231	22083	22560	22420	23567
6.21_740.56	PE 37:3e; PE 19:1e/18:2;	LQPRBMLFURBQLI-BXAGGIISNA-N	[M-H]-	740.559	ESI (-)	6.208	3525	4368	2040	1528	2241	2640	5792	6205	6906	6853	7418	7245	39	37	48	3.22	32	40	3.22	3.22	3.22	3.22	3.22	3.22	7823	8146	8066	8575	8380	8047
5.00_750.51	PE 37:5; PE 17:0-20:5;	YRRQJTQXWQBPQK-VZVMVVDZNA-N	[M-H]-	750.509	ESI (-)	4.996	25769	31485	27147	16618	21505	28272	70541	83259	93445	106917	92353	87388	100	1.57	1.57	23	16	1.57	37	69	168	168	114	270	92050	92357	94470	95865	96685	97858
4.64_748.49	PE 37:6; PE 17:1-20:5;	ZCCDICVUABCLQJ-AJENXLFJNA-N	[M-H]-	748.492	ESI (-)	4.636	46006	54092	62168	37207	56870	76198	22480	26194	28509	33033	29926	28449	36	37	27	104	57	84	39	2.67	49	45	45	46	34443	35505	35456	36692	35670	38506
7.11_772.59	PE 38:1; PE 20:0-18:1;	VDNXNFMAFDYQSI-UZYVYHOENA-N	[M-H]-	772.586	ESI (-)	7.106	30247	38002	27315	15586	25884	35714	8703	8907	10962	12660	12961	12623	44	229	187	231	191	164	4.42	4.42	47	4.42	4.42	54	13522	13150	13450	13712	13211	13778
5.83_770.57	PE 38:2;	CLPMAPXZURYSNH-CNBLIUODSA-N	[M-H]-	770.57	ESI (-)	5.825	1044	1300	978	760	991	976	803	780	885	1031	895	891	22409	21995	22641	21736	22075	22386	10.79	10.79	10.79	10.79	10.79	10.79	870	937	849	922	1005	964
6.58_770.57	PE 38:2; PE 20:0-18:2;		[M-H]-	770.568	ESI (-)	6.579	9722	12098	7208	4529	6998	9097	8292	8539	10326	11385	11141	9491	216	256	270	289	251	293	3.7	72	3.7	3.7	37	38	14015	14298	14346	14644	7266	6235
6.99_756.59	PE 38:2e; PE 18:0e/20:2;	RGGRDRLKCMHWDY-OHNCOSGTNA-N	[M-H]-	756.591	ESI (-)	6.991	3162	4317	1703	1046	1843	2453	8624	8811	9230	10976	12028	10607	40	92	81	87	90	137	4.04	4.04	4.04	4.04	4.04	4.04	14351	14545	14559	13900	15032	15346
7.41_756.59	PE 38:2e; PE 18:1e/20:1;	QEVTZYOGQJVUDJ-CLFAGFIQNA-N	[M-H]-	756.591	ESI (-)	7.413	11131	14932	8661	4882	8430	11298	4199	4395	5007	5491	6469	5955	733	402	667	532	403	477	3.77	3.77	3.77	3.77	38	3.77	7658	7593	7629	7916	7697	7737
6.12_768.55	PE 38:3; PE 18:0-20:3;	MSYFXMJDQLPRGO-JTBMWNAQNA-N	[M-H]-	768.555	ESI (-)	6.125	49631	61020	40824	25714	40626	52374	50565	52873	57632	67430	58102	51791	2340	2137	2359	2221	2042	2457	3.5	105	3.5	35	44	101	31126	30406	30155	30174	30957	31164
6.55_754.58	PE 38:3e; PE 18:0e/20:3;	ISTKKMUAKPNLKS-JTBMWNAQNA-N	[M-H]-	754.575	ESI (-)	6.55	6233	8144	4917	3435	5250	6210	45377	49467	51839	60706	50206	45617	7.81	7.81	7.81	7.81	7.81	7.81	7.81	7.81	7.81	78	7.81	7.81	21049	19822	21076	20400	20806	21637
5.06_766.54	PE 38:4; A	ANRKEHNWXKCXDB-BHFWLYLHSA-N	[M-H]-	766.538	ESI (-)	5.06	3482	4138	3112	2000	3070	3727	1765	1971	2759	2838	2734	2847	20139	20024	20533	19968	20072	19851	53	59	53	4.52	45	60	1801	1367	1935	1407	2157	968
5.84_766.54	PE 38:4; B	ANRKEHNWXKCXDB-BHFWLYLHSA-N	[M-H]-	766.539	ESI (-)	5.842	20670	25370	20059	13421	20758	26109	19863	22098	24750	28510	23413	21702	63191	61259	74164	72584	70068	70244	365	124	44	38	115	50	22251	22229	23735	23491	23923	22939
5.67_766.54	PE 38:4; PE 18:0-20:4;	YEHAZLUVAZKVRO-ZKVKLVECNA-N	[M-H]-	766.539	ESI (-)	5.667	80885	98981	69064	43116	72416	98486	65427	76926	77727	88680	84309	82291	1428	1364	1642	1482	1817	1626	80	65	70	104	157	201	40744	41639	42299	43150	42656	42514
5.40_764.52	PE 38:5; PE 18:0-20:5;	MOJMRZJNAPRFBD-GLWDABGQNA-N	[M-H]-	764.524	ESI (-)	5.401	494539	601146	549636	320876	502996	688645	326892	375061	395625	461046	418977	381575	1932	2261	2302	2655	2401	2643	75	546	788	785	795	1099	425132	419350	413814	419110	426543	441503
5.06_764.52	PE 38:5; PE 18:1-20:4;	ZYMZKMQPPJPQHY-HAGCXRLMNA-N	[M-H]-	764.523	ESI (-)	5.06	18295	22694	16896	10196	16592	22316	17690	19755	20953	24002	25584	24320	1519	1406	1381	1526	1788	1415	4.18	70	42	4.18	102	4.18	12688	12054	12156	12416	12033	12578
5.03_762.51	PE 38:6;	VRBJSZDBPQLNEM-PFTGJCAASA-N	[M-H]-	762.506	ESI (-)	5.026	1265	1351	1195	879	946	1284	421	359	405	398	521	521	11270	10033	10675	10805	10760	11755	268	64	42	39	43	53	611	419	588	599	493	636
4.82_762.51	PE 38:6; PE 18:1-20:5;	AMKOUQLHUASJMB-HHHWHCSPNA-N	[M-H]-	762.509	ESI (-)	4.817	83071	104257	110704	64975	94659	126492	58232	67649	74625	87103	88171	79162	189	362	538	403	498	485	3.68	37	138	146	152	274	86425	82303	83411	85352	85063	92246
5.69_748.53	PE 38:6e; PE 18:1e/20:5;	WHKDVYYCCUAIBY-QSOAFSPRNA-N	[M-H]-	748.529	ESI (-)	5.691	168873	201344	139078	83396	135263	185063	200126	229613	260600	288515	276962	266360	14086	14315	16904	16969	16368	17599	27.13	285	306	301	271	360	209263	210837	216057	218446	218885	225317
4.38_760.49	PE 38:7; PE 18:2-20:5;	AJTJVNKPLZTLHV-WJFLDVDQNA-N	[M-H]-	760.491	ESI (-)	4.385	9885	13104	9408	5351	8771	11425	9625	10821	11806	13034	12397	11956	72	58	107	114	120	77	3.58	41	3.58	3.58	36	36	14687	13849	14798	14349	14696	15219
4.08_758.48	PE 38:8; PE 18:3-20:5;	HFWHJOLEJCSBHZ-VDFSNEKNNA-N	[M-H]-	758.476	ESI (-)	4.082	5179	6541	5379	3033	4511	6055	3255	4070	4769	5710	4727	4587	38	3.84	3.84	43	43	3.84	62	3.84	3.84	96	3.84	3.84	5135	5067	5085	5076	5221	5197
7.58_786.60	PE 39:1; PE 22:0-17:1;	IMHKHEDSQIHRIV-VLGSPTGONA-N	[M-H]-	786.601	ESI (-)	7.582	11000	14583	10464	6001	10510	14618	8339	8465	11667	13990	10441	9881	3.16	3.16	3.16	74	32	39	43	46	36	3.16	3.16	38	16518	15957	17194	16287	16635	17547
7.75_800.62	PE 40:1; PE 22:0-18:1;	FWHVZNCIAUKGET-NKFKGCMQNA-N	[M-H]-	800.616	ESI (-)	7.745	9777	12334	8155	4972	8680	11517	2111	2030	2928	3309	3376	3044	49	3.78	3.78	61	3.78	53	49	38	3.78	56	3.78	98	5305	5187	5085	5186	5043	5261
3.94_782.48	PE 40:10; PE 20:5-20:5;	IHTIZXOEIOXSDI-LPEZNXMBNA-N	[M-H]-	782.476	ESI (-)	3.94	17969	22767	15278	9593	14749	20483	8779	10405	11246	13348	10373	11009	31	2.96	30	40	2.96	87	44	95	57	2.96	53	52	10901	10982	10599	10882	11097	11156
7.28_798.60	PE 40:2; PE 22:0-18:2;	UKSDTIJAYBAFLE-FTXUBOSRNA-N	[M-H]-	798.6	ESI (-)	7.278	3382	4357	2536	1578	2715	3620	2816	2738	3787	4399	3425	3508	1248	1318	1174	1225	1195	1416	655	439	391	439	346	505	7991	7830	7782	8113	7892	7939
6.06_792.55	PE 40:5; PE 20:0-20:5;	MWDRGYRNYDLFKA-VZTVXHQSNA-N	[M-H]-	792.554	ESI (-)	6.057	17426	20666	15560	10827	15297	20092	11944	12972	14681	16950	14409	12561	1030	983	991	920	981	274	3.76	49	38	63	51	77	16826	15997	16861	17189	17046	17751
4.90_790.54	PE 40:6;	FEABWDMFZNBFCT-KUVQHVNNSA-N	[M-H]-	790.538	ESI (-)	4.896	370	534	462	398	395	581	335	307	376	490	398	386	4393	4013	4032	4572	4327	4198	17.65	17.65	17.65	17.65	17.65	17.65	401	590	525	495	559	473
4.16_784.49	PE 40:9; PE 20:4-20:5;	VIPNJNOYNFESAL-WMRBQUBTNA-N	[M-H]-	784.491	ESI (-)	4.163	13084	15428	10473	6925	10441	13981	9759	10798	12361	14541	12773	11665	0.91	31	0.91	52	40	0.91	58	0.91	0.91	35	9	0.91	7885	8100	8586	8448	8242	8284
6.14_700.53	PE p-34:1; or PE o-34:2;	ZOSSFCIAXYNTHL-CSTBBDSDSA-N	[M-H]-	700.528	ESI (-)	6.139	12277	14773	13697	9473	13158	17213	6292	7036	7692	8472	9687	10093	3937	3946	3915	3631	3743	3811	39	3.46	3.46	3.46	3.46	35	12268	12456	12744	12627	12915	12880
5.64_698.51	PE p-34:2; or PE o-34:3;	LALFTIIBOJSVNP-OBEJFMRTSA-N	[M-H]-	698.512	ESI (-)	5.637	3374	4050	3161	1840	2610	3727	727	737	812	887	1027	1079	3899	13196	14003	13727	14258	14733	56	5.58	5.58	5.58	5.58	5.58	1327	1407	1298	1206	1360	1407
6.79_728.56	PE p-36:1; or PE o-36:2;	OBAAWAYLQLYWNN-KHFVPPDWSA-N	[M-H]-	728.56	ESI (-)	6.793	575248	684943	494442	298160	478034	648143	383564	414288	480395	525022	597877	572272	3932	3879	3811	4201	4022	4299	49.44	556	498	494	673	692	500991	506574	515724	519061	515397	542607
6.27_726.54	PE p-36:2; or PE o-36:3;	XVXISDREVDGQPX-PISDLAQISA-N	[M-H]-	726.545	ESI (-)	6.274	67152	82128	46702	27219	47934	64614	108331	121830	137782	146733	150219	148207	22348	21461	23514	23664	22056	23954	38	295	170	255	193	361	184768	185457	190276	189555	192015	200132
5.46_722.51	PE p-36:4; or PE o-36:5;	UUYSKERSKRMYME-MAIXUNBTSA-N	[M-H]-	722.513	ESI (-)	5.456	7293	4426	5632	3464	4973	7296	1051	994	1100	1124	1438	1299	56263	52638	59162	60448	57847	60887	5.03	50	5.03	5.03	5.03	5.03	2506	2763	2576	2546	2668	2605
5.13_720.50	PE p-36:5; or PE o-36:6;	RLLOITCRNQRGJD-DFAKUSJGSA-N	[M-H]-	720.497	ESI (-)	5.13	1711	2165	1294	792	1049	1662	118	119	208	91	244	123	362	303	412	394	394	386	37	49	79	76	49	38	712	707	651	792	701	748
6.88_754.58	PE p-38:2; or PE o-38:3;	LZGIKQZCPKHHMV-NANSGXCVSA-N	[M-H]-	754.575	ESI (-)	6.876	8867	11162	5477	3344	5451	7239	9600	10212	10232	11226	12306	12023	981	1124	45.71	2192	45.71	45.71	45.71	45.71	45.71	45.71	45.71	45.71	21868	21476	22206	21862	22009	23094
6.43_752.56	PE p-38:3; or PE o-38:4;	YHSWSUHZIXJBHZ-OWTAGOBYSA-N	[M-H]-	752.56	ESI (-)	6.435	38326	49980	30523	19664	33821	45774	71721	80389	91624	98839	89870	83557	2633	2535	2666	2681	2406	2644	55	51	79	49	85	73	49606	49821	51883	52807	53387	53359
6.15_750.54	PE p-38:4; or PE o-38:5;	URPXXNCTXCOATD-FXMFQVEGSA-N	[M-H]-	750.544	ESI (-)	6.147	13921	16763	11487	7310	11329	14377	33641	37321	42720	47916	39452	36790	82355	80129	85621	84066	84566	86396	87	88	132	165	79	156	36880	34593	35727	35346	35749	38441
6.81_778.58	PE p-40:4; or PE o-40:5;	OQKUDRFZPJFLJQ-KMUIXOOCSA-N	[M-H]-	778.578	ESI (-)	6.811	14.78	14.78	14.78	14.78	14.78	14.78	14.78	14.78	14.78	14.78	14.78	14.78	3507	3688	3858	3964	3915	4112	14.78	148	14.78	14.78	14.78	163	14.78	14.78	14.78	14.78	14.78	14.78
6.57_729.59	PE-Cer d39:1;	BJMJJAWULCRMQM-NTMALXAHNA-N	[M-H]-	729.591	ESI (-)	6.573	15687	19771	12617	7818	10716	14765	15760	17841	18710	23012	23397	22205	2.89	35	32	33	29	2.89	2.89	2.89	2.89	2.89	2.89	2.89	16636	16526	16994	16897	16722	18215
6.33_745.59	PE-Cer t39:1; PE-Cer t20:0/19:1;	UQGKPUWNXXGVKI-VXPUYCOJNA-N	[M-H]-	745.585	ESI (-)	6.327	11417	13718	10523	6667	9797	12946	9027	9625	11677	12751	13421	12930	0.53	101	5	116	0.53	59	0.53	0.53	0.53	27	0.53	0.53	11388	11433	11958	12428	12162	12493
5.25_775.55	PG 36:1; PG 18:0-18:1;	ZEFGRNLJASLRBZ-ZZEZOPTANA-N	[M-H]-	775.551	ESI (-)	5.253	27652	39530	50705	29038	49628	72681	65743	84808	91885	99839	91200	81317	1830.85	1830.85	1830.85	1830.85	1830.85	1830.85	1830.85	1830.85	1830.85	1830.85	1830.85	1830.85	76035	77858	84385	84385	84812	86084
4.39_821.52	PI 33:1; PI 16:0-17:1;	RAGNFBNEONMEQW-ICFOKQHNNA-N	[M-H]-	821.518	ESI (-)	4.388	3779	4677	9425	6201	7471	10507	1469	1506	1579	1804	1261	1460	4.2	4.2	4.2	4.2	4.2	110	4.2	4.2	4.2	42	43	59	8526	9178	9083	9358	9555	9448
4.43_847.53	PI 35:2; PI 17:1-18:1;	MNJOHIMMKUCWHD-YGGBKCGDNA-N	[M-H]-	847.533	ESI (-)	4.43	12255	15502	19819	12619	17409	24072	2725	2535	3132	3727	3333	2878	1266	1295	1377	1522	1296	1408	41	3.95	49	3.95	40	43	6000	5604	6071	6100	5901	5932
5.14_863.57	PI 36:1; PI 18:0-18:1;	YOBFISPJJWPPTK-ZZEZOPTANA-N	[M-H]-	863.565	ESI (-)	5.139	22444	9865	25585	16272	24953	33092	7124	7850	8954	10602	9031	10608	19476	19666	22171	21878	20786	21518	48	43	37	49	24	80	14701	14873	15899	15203	15164	16373
4.22_859.53	PI 36:3; PI 18:1-18:2;	MXJMOLQIXMJUEL-RQOIEFAZNA-N	[M-H]-	859.533	ESI (-)	4.222	5023	6183	3983	2297	4024	5072	5849	6122	6916	8566	7811	7042	9059	8502	9389	9434	9019	9388	7.81	7.81	78	7.81	7.81	7.81	8122	8386	8291	8237	8423	8508
3.82_855.50	PI 36:5; PI 16:0-20:5;	FQGSWQFJOVVRRB-LPHKCNJWNA-N	[M-H]-	855.503	ESI (-)	3.822	14985	17981	26184	16895	21093	28740	37631	41654	46075	52325	49730	47392	227	201	266	347	168	249	3.88	44	80	45	39	77	59623	59372	63715	64858	61921	65360
4.04_869.52	PI 37:5; PI 17:0-20:5;	DGRNZNZECRXZCS-VZVMVVDZNA-N	[M-H]-	869.518	ESI (-)	4.045	20740	24658	25484	16188	22398	29861	9353	10710	10158	12211	10842	10787	43	72	37	3.66	46	65	3.66	3.66	37	3.66	3.66	44	12217	13713	13797	13705	13607	14464
4.63_885.55	PI 38:4; PI 18:0-20:4;	OJESNYFIPWSOPO-ZKVKLVECNA-N	[M-H]-	885.551	ESI (-)	4.628	19028	23179	15258	9759	14815	20058	11457	11354	13598	15810	14403	13553	218016	221780	234223	235330	225930	239884	476	94	3.63	36	3.63	3.63	18346	18520	18047	18914	17449	19940
4.29_883.53	PI 38:5; PI 18:0-20:5;	SUYDNPBYMBTSMM-GLWDABGQNA-N	[M-H]-	883.534	ESI (-)	4.288	469694	556569	439635	281318	420224	567053	328212	358717	364660	426825	450096	416898	1947	2628	2737	6344	2434	6668	33.13	376	331	472	348	597	405653	424816	431538	440164	426488	451332
3.86_881.52	PI 38:6; PI 18:1-20:5;	ZHEIBMBVWLKKJS-HHHWHCSPNA-N	[M-H]-	881.519	ESI (-)	3.861	36074	44135	43095	26368	36153	50464	67565	79028	88282	100135	108700	95786	154	109	69	112	188	208	4.08	4.08	70	93	41	91	63039	63639	66810	66835	67614	68934
4.17_895.53	PI 39:6; PI 19:1-20:5;	SIOGOZKHLVLGFK-ZLGQNYCKNA-N	[M-H]-	895.534	ESI (-)	4.169	47112	55005	37116	22805	34218	46398	40253	43387	44519	53068	51024	46049	3.05	107	33	31	112	45	42	3.05	37	35	3.05	110	42287	46664	46012	46166	45456	48754
3.90_780.48	PS 36:5; PS 16:0-20:5;	VLPJTQXJVHPDIV-LPHKCNJWNA-N	[M-H]-	780.482	ESI (-)	3.896	9197	11213	11920	7470	9710	12801	7721	8779	9769	10756	11557	11736	3.75	3.75	65	3.75	3.75	45	3.75	37	43	3.75	3.75	3.75	14797	14769	15417	15577	14853	15073
4.59_810.53	PS 38:4; PS 18:0-20:4;	IULWELDCBXQXED-ZKVKLVECNA-N	[M-H]-	810.528	ESI (-)	4.591	13466	16302	12634	7962	13044	16082	9624	10050	10463	12256	13258	12320	44	78	25	69	39	51	2.53	46	39	2.53	37	36	8316	8411	8589	8345	8434	8712
4.36_808.51	PS 38:5; PS 18:0-20:5;	DERBZMCOPJTRSZ-GLWDABGQNA-N	[M-H]-	808.514	ESI (-)	4.361	151832	171123	130203	82292	133848	174723	67570	75436	81296	88827	107849	102168	32	141	12	39	103	176	36	270	259	127	204	362	88146	92789	92180	94254	94212	94616
4.25_733.55	SM d32:1;	KYICBZWZQPCUMO-PSALXKTOSA-N	[M+HAc-H]-	733.55	ESI (-)	4.253	482	710	780	439	781	704	38	2.55	57	90	52	45	37430	38261	40788	40659	38900	39753	2.55	40	2.55	35	2.55	2.55	405	311	303	315	371	321
4.91_761.58	SM d34:1;	RWKUXQNLWDTSLO-GWQJGLRPSA-N	[M+HAc-H]-	761.58	ESI (-)	4.905	531	166	562	400	1878	557	224	146	100	57	60	131	58083	318932	335160	338632	325125	329768	1.44	46	56	70	120	115	250	302	412	488	359	74
5.55_789.61	SM d36:1;	LKQLRGMMMAHREN-YJFXYUILSA-N	[M+HAc-H]-	789.612	ESI (-)	5.551	670	690	449	520	3612	462	292	349	288	372	345	413	60813	58794	62881	64542	61666	59309	430	365	373	395	372	381	389	462	427	403	483	421
6.25_817.64	SM d38:1;	AADLTHQNYQJHQV-SVLGDMRNSA-N	[M+HAc-H]-	817.644	ESI (-)	6.252	7158	8320	7115	5161	7767	8304	906	879	1072	1015	881	1160	54479	50453	54221	54363	53866	55869	35.15	35.15	35.15	35.15	35.15	35.15	3432	3451	3562	3392	3483	3348
6.50_807.62_6.50_831.66	SM d39:1;	YXSZOBWVQJIWNE-LUJNSPTCSA-N	[M+Cl]-_[M+HAc-H]-	807.6155_831.6587	ESI (-)	6.498	17626	21431	15121	10165	14158	17907	31807	32246	36808	40072	43589	45849	1350	984	1112	1028	984	912	149	215	106.55	155.55	96	140	26885	24615	26780	27034	26218	26625
6.84_845.67	SM d40:1;	FJJANLYCZUNFSE-QVMKKYBKSA-N	[M+HAc-H]-	845.67	ESI (-)	6.837	1789	2097	1716	1024	1480	1708	1468	1576	1810	1980	1802	1811	11648	2447	2385	3828	2489	2077	49	3.58	3.58	3.58	36	37	1723	1662	1683	1570	1618	1653
7.18_859.69	SM d41:1;	SXZWBNWTCVLZJN-NMIJJABPSA-N	[M+HAc-H]-	859.689	ESI (-)	7.181	1162	1557	1047	663	949	1320	3998	3989	5064	5882	5227	4877	9481	3398	3593	3618	3585	3483	3.53	49	3.53	40	35	3.53	2821	2512	2844	2789	2857	2957
7.80_887.72	SM d43:1;	LXMARZYBSFYVSY-KUQVZNNZSA-N	[M+HAc-H]-	887.72	ESI (-)	7.798	238	349	290	34	164	274	823	815	1024	1235	880	936	2337	1912	2246	2150	2122	2142	3.43	3.43	36	41	3.43	41	431	448	446	267	226	308
1.15_446.33	ACar 20:5;	[M]+	USUPQTJPNBGUSJ-WMPRHZDHNA-O	446.326	ESI (+)	1.151	5620	5176	3201	1710	2745	5772	3603	5941	6064	5724	7046	4353	49	21	43	41	49	2.06	2.06	40	27	2.06	2.06	31	2983	3369	3487	3585	4162	4443
7.23_594.58_7.23_576.57_7.24_616.56	Cer d38:1;	[M+H]+ _[M+H-H2O]+ _[M+Na]+		594.5828_576.5707_616.5644	ESI (+)	7.23267	2028	2532	2386	1616	2034	3177	404	482	532	772	448	485	1849	1689	1770	1886	1832	1836	37.42	7.7	73.3	127	178	162.28	1696	1661	1490	1457	1643	1827
7.97_648.63	Cer d42:2; B	[M+H]+	VJSBNBBOSZJDKB-KPEYJIHVSA-N	648.629	ESI (+)	7.975	265	76	228	76	208	72	139	116	126	115	92	117	2266	2392	2495	2363	2516	2554	18	1.75	41	73	69	55	91	94	219	172	173	1802
7.47_608.60	Cer-NS d39:1; Cer-NS d17:1/22:0;	[M+H]+	NHEGYDMEFDPAEY-NWBJSICCNA-N	608.598	ESI (+)	7.466	1016	1206	787	469	664	1140	4490	5215	6404	7495	4428	4165	89	47	151	103	34	94	100	101	121	104	85	115	5875	6052	5864	6479	6016	6903
7.14_606.58	Cer-NS d39:2; Cer-NS d17:1/22:1;	[M+H]+	USTGJUYHSWCYMJ-BMAPTVNRNA-N	606.582	ESI (+)	7.139	3578	4879	3045	1647	2542	3565	11713	11922	18165	22490	14714	13734	3.6	63	3.6	76	44	39	83	62	52	100	36	88	29864	28142	27645	28409	28477	31237
7.81_634.61	Cer-NS d41:2; Cer-NS d17:1/24:1;	[M+H]+	IHCUODHUCJDYIO-XDORPINWNA-N	634.615	ESI (+)	7.81	1121	1274	824	430	951	1259	10990	11470	18150	20800	14427	12972	98	3.07	31	39	80	3.07	73	98	49	3.07	54	31	18393	17982	17905	18171	17775	18840
4.99_369.35	Cholesterol	[M+H-H2O]+	HVYWMOMLDIMFJA-DPAQBDIFSA-N	369.352	ESI (+)	4.987	5607	5850	4423	3274	3568	4208	2450	2981	2751	2779	4268	4593	106371	104487	101074	98886	95393	93516	709	1026	876	826	837	918	2705	2526	2936	2678	2738	3074
6.96_624.56	DAG 35:2; DAG 17:1-18:1;	[M+NH4]+	VZRUYZOUKQDWIP-YGGBKCGDNA-N	624.558	ESI (+)	6.957	6034	8902	7702	4384	6799	11181	4435	3491	4288	5337	6205	6165	96	75	38	3.7	3.7	92	3.7	3.7	3.7	3.7	3.7	37	6248	6334	6021	5934	5507	5461
6.44_622.54	DAG 35:3; DAG 17:1-18:2;	[M+NH4]+	DRDDPVBZYGRUBV-DAWNVERKNA-N	622.543	ESI (+)	6.442	4926	7186	4224	2425	3961	7063	5584	4202	5934	6868	6385	6991	2.96	39	44	49	86	49	119	30	45	39	2.96	2.96	11028	10231	9699	10248	9812	10167
5.56_618.51	DAG 35:5; DAG 15:0-20:5;	[M+NH4]+	NTJHKGFUSIEKLS-PARIFVSLNA-N	618.509	ESI (+)	5.564	6016	8278	7403	4349	6443	9696	12455	9999	14419	17081	15156	16604	202	141	192	136	111	228	3.17	73	33	42	32	196	11464	10769	10546	10112	9856	10715
5.99_632.53	DAG 36:5; DAG 16:0-20:5;	[M+NH4]+	WLYFADQAJKNNQG-LPHKCNJWNA-N	632.526	ESI (+)	5.993	12232	17910	14926	8829	13042	20979	13289	10506	14569	16938	19581	20612	115	139	188	158	76	188	40	93	106	49	63	182	25088	24085	23587	23772	23132	23755
5.84_644.53	DAG 37:6; DAG 17:1-20:5;	[M+NH4]+	WERRGPMLQNSZCP-AJENXLFJNA-N	644.526	ESI (+)	5.842	73278	100874	76779	40920	73684	122044	50907	39527	53335	66418	63960	65199	3.7	37	3.7	56	58	3.7	3.7	3.7	50	51	3.7	3.7	65659	66403	63684	61661	61591	63244
6.69_660.56	DAG 38:5; DAG 18:0-20:5;	[M+NH4]+	HPDSQOGOAWTQTB-GLWDABGQNA-N	660.556	ESI (+)	6.686	52360	86328	52771	28469	51642	79123	17888	15440	19025	22456	23505	25799	70	59	130	141	150	155	126	63	83	94	133	38	31908	32712	32324	30505	29990	28523
5.52_656.53	DAG 38:7; DAG 18:2-20:5;	[M+NH4]+	NJMRNAUCBISRLW-WJFLDVDQNA-N	656.526	ESI (+)	5.518	31393	39941	21355	12935	23301	32846	42190	32604	46598	54201	51765	55460	352	132	266	327	253	443	41	86	74	45	87	122	71493	68328	65825	65149	65482	62932
4.93_678.51	DAG 40:10; DAG 20:5-20:5;	[M+NH4]+	JHFHIXGYPUDQSZ-LPEZNXMBNA-N	678.511	ESI (+)	4.931	142781	6222	169103	116940	201481	275985	220	231246	278963	249086	302768	25690	253	148	113	2.95	86	77	31	30	124	132	51	220	3972	199798	231030	249967	224591	122223
5.70_682.54	DAG 40:8; DAG 20:3-20:5;	[M+NH4]+		682.541	ESI (+)	5.702	45360	71246	37655	25154	35519	50740	57517	40944	65631	74650	64646	72949	117	36	88	69	3.6	387	3.6	93	98	51	95	3.6	47737	46950	44340	41362	39475	33988
5.22_680.52	DAG 40:9; DAG 20:4-20:5;	[M+NH4]+	FSGLSWZWGRJDEF-WMRBQUBTNA-N	680.525	ESI (+)	5.225	41455	43138	25009	15596	28623	42884	46188	36180	48176	54359	53837	57759	58	3.46	3.46	61	35	56	3.46	55	46	100	84	3.46	28381	26189	26632	26261	28412	30618
7.12_633.49_7.15_617.51_7.13_612.56	DG 34:1;	[M+K]+_[M+Na]+_[M+NH4]+	YEJYLHKQOBOSCP-OZKTZCCCSA-N	633.4872_617.5103_612.556	ESI (+)	7.13533	1535	2142	2508	1802	2114	2961	1558	1549	1588	1852	3090	5157	9610	10626	11720	10872	9824	9940	100.27	126	156	74.84	179	271	3375	2947	2724	2376	2263	2118
6.60_615.50_6.59_610.54	DG 34:2;	[M+Na]+_[M+NH4]+	SVXWJFFKLMLOHO-YAIZGCQRSA-N	615.4969_610.5401	ESI (+)	6.5965	1781	2473	2291	1187	1842	3074	3871	2793	3130	4030	4474	5322	11188	11765	13165	11874	11030	10379	59.58	127.58	83	123.58	68	145	5500	5203	5037	5080	4528	5082
5.98_613.48_5.98_608.52	DG 34:3;	[M+Na]+_[M+NH4]+	BHGPPCIWDXQOMA-IXDOJJAKSA-N	613.4801_608.5223	ESI (+)	5.9825	1309	1718	1540	1095	1229	2358	1414	882	996	1877	1732	1891	907	800	1189	973	1095	1064	66	39.39	6.23	123	43.39	36.39	2084	2000	2261	2252	1779	1766
7.78_645.54_7.78_640.59	DG 36:1;	[M+Na]+_[M+NH4]+	SAEPUUXWQQNLGN-LVVMQYBKSA-N	645.5378_640.5875	ESI (+)	7.777	3623	5014	3401	2824	3722	6074	1248	1085	835	1515	2479	2257	1122	1183	1571	1176	738	1463	77.82	61.82	185	135	134	192	1950	2209	2366	2154	1852	1277
7.20_643.53_7.15_638.58	DG 36:2;	[M+Na]+_[M+NH4]+	AFSHUZFNMVJNKX-LLWMBOQKSA-N	643.5283_638.5765	ESI (+)	7.1735	2344	3245	3232	2834	2371	3520	3040	2500	3447	4388	5174	5988	5864	4175	6892	6870	5793	5629	502	341	186.09	309	354	354.09	4613	4197	3944	4227	3760	2866
6.64_657.49_6.64_641.51_6.64_636.56	DG 36:3;	[M+K]+_[M+Na]+_[M+NH4]+	BLZVZPYMHLXLHG-JOBMVARSSA-N	657.488_641.5118_636.5566	ESI (+)	6.64367	4186.09	6443.09	4141.09	2626	4178	6380	7977	6940	9331	10792	11428	11994	13162	14093	15837	14474	12651	12873	124	137	91.09	168	134	128.09	14623	14928	14325	14418	13715	13221
6.11_655.47_6.11_639.50_6.13_634.54	DG 36:4; A	[M+K]+_[M+Na]+_[M+NH4]+	MQGBAQLIFKSMEM-ZHARMHCNSA-N	655.4717_639.4961_634.5407	ESI (+)	6.115	4186	5418	4520	3249	3753	6025	3451	2401	4081	4222	5047	4924	5782	6450	6173	6094	5996	6642	203	101.79	43.43	154	170	60.43	10363	9617	9609	9342	9910	9395
6.26_639.50_6.28_634.54	DG 36:4; B	[M+Na]+_[M+NH4]+	MQGBAQLIFKSMEM-ZHARMHCNSA-N	639.496_634.5391	ESI (+)	6.274	4753	6039	5072	3130	4547	7062	6590	5155	7493	7876	9158	10327	769	833	953	783	695	376	85	68	42.54	34.48	28.48	130	7115	7246	7083	6759	6634	6460
5.79_637.48_5.74_632.52	DG 36:5;	[M+Na]+_[M+NH4]+	PGXBELQFNRPKBC-WBVIKXMWSA-N	637.4833_632.524	ESI (+)	5.7675	5158	7224	6946	4895	6117	8297	4329	2972	4571	4635	5421	5751	1118	876	1265	1144	759	1000	240	205	175	202	125	342	6702	6630	5988	6213	6390	6032
5.40_630.51_5.39_651.44_5.40_635.47	DG 36:6;	[M+NH4]+ _[M+K]+ _[M+Na]+		630.5108_651.4397_635.4653	ESI (+)	5.39467	6367	8501.8	9460	7509	7959	10417	10827	7579	9927	11634	11872	12371	167	131.2	70.98	149	8.78	225	50.58	98	76.8	106	67.2	119.2	10143	9667	9054	8847	9572	8323
6.49_665.51_6.50_660.55	DG 38:5;	[M+Na]+_[M+NH4]+	GRGDLDNREYVILP-CNWVQWJYSA-N	665.5126_660.5537	ESI (+)	6.498	4227	6357	4109	2514	2954	4113	4191	3737	5583	5866	5855	5938	3023	3054	3152	3035	2749	2708	62.9	155	198	80	12.9	131	6332	6074	6319	5795	6008	5200
6.04_679.47_6.04_663.50_5.99_658.54	DG 38:6;	[M+K]+_[M+Na]+_[M+NH4]+	YDVDXUYJFQLPEG-CTHJWPIASA-N	679.4691_663.4961_658.5402	ESI (+)	6.02567	68615	50086	36987	41232	62081	93732	38926	54455	45313	47265	53849	60432	2702	1777.33	2128	1933.33	1889.33	1677	42.19	104.33	53.19	34.19	106.33	230	47029	46914	48603	49078	74956	72881
1.38_508.34	LPC 17:1;	[M+H]+	LPMGFNAQZPADDZ-FJIRUFBNSA-N	508.339	ESI (+)	1.378	9812	10739	7343	9929	7336	13631	5250	3995	4992	7249	6444	9744	107	76	36	138	122	103	90	55	55	3.56	47	58	5254	5985	6491	6057	6559	6968
1.98_548.37	LPC 20:2;	[M+H]+	YYQVCMMXPIJVHY-ZOIJLGJPSA-N	548.372	ESI (+)	1.979	395	172	226	73	225	354	75	204	361	312	319	370	2169	1993	2354	2334	2121	2296	1.95	24	29	46	45	36	566	521	366	599	547	342
1.05_468.31	LPC 14:0;	[M+H]+	VXUOFDJKYGDUJI-OAQYLSRUSA-N	468.31	ESI (+)	1.048	704	1038	389	417	569	699	1430	1257	1492	1564	1677	1836	4598	5161	6239	7272	7173	9647	60	92	51	48	29	2.89	909	1154	990	1071	1150	1110
1.25_482.33	LPC 15:0;	[M+H]+	RJZVWDTYEWCUAR-JOCHJYFZSA-N	482.325	ESI (+)	1.247	364	196	273	111	155	187	4922	3318	5408	5953	5717	5961	224	379	527	461	579	915	38	42	47	32	14	15	2386	2966	2935	3118	2923	3344
1.64_496.34	LPC 16:0;	[M+H]+	ASWBNKHCZGQVJV-HSZRJFAPSA-N	496.34	ESI (+)	1.635	3362	4532	4061	2992	4076	4706	5975	4696	6991	8351	8377	9295	670806	814725	994709	1016477	871579	964176	225	82	655	187	109	271	7454	7807	7866	8219	8771	10410
1.17_494.32	LPC 16:1;	[M+H]+	LFUDDCMNKWEORN-ZXEGGCGDSA-N	494.323	ESI (+)	1.172	1304	1448	1924	1662	2014	2413	2573	1858	3025	3091	3344	3527	7352	8106	8826	9102	8472	9442	3.28	48	47	33	77	39	1746	2029	2109	2000	1952	2213
1.52_508.34	LPC 17:1-SN1;	[M+H]+	LPMGFNAQZPADDZ-QXMHVHEDNA-N	508.34	ESI (+)	1.516	17528	18463	17009	14232	18459	26522	21533	17915	25010	27754	27647	29681	769	425	910	569	460	880	60	4.26	69	43	99	94	18067	18601	19241	19966	20869	21343
2.31_524.37	LPC 18:0;	[M+H]+	IHNKQIMGVNPMTC-RUZDIDTESA-N	524.372	ESI (+)	2.314	620	2202	1397	1279	1105	1798	388	408	361	427	413	601	13392	14526	16866	16638	8056	7195	62	38	32	41	27	99	581	621	620	468	339	378
1.79_522.36	LPC 18:1;	[M+H]+	YAMUFBLWGFFICM-PTGWMXDISA-N	522.356	ESI (+)	1.789	7539	7989	6347	5008	6444	8826	13392	10425	15551	16795	18443	20000	81989	89855	100700	99616	91795	96912	39	23	64	32	74	39	10680	10778	11150	11565	11518	12206
1.34_520.34	LPC 18:2;	[M+H]+	SPJFYYJXNPEZDW-FTJOPAKQSA-N	520.341	ESI (+)	1.343	4136	4206	2590	2187	2687	4261	8996	7396	10185	10644	10505	11963	139743	154469	175930	175946	160542	165379	210	146	209	94	74	158	10131	10156	10592	11897	11503	12571
1.07_518.32	LPC 18:3;	[M+H]+	WKQNRCYKYCKESD-YVHLTTHBSA-N	518.325	ESI (+)	1.07	4345	4199	2826	2721	3317	4780	4000	3452	4198	4501	4344	5039	1713	1786	2357	3164	2909	4251	117	51	75	47	98	83	3357	3514	3687	4096	4154	5063
2.27_536.37	LPC 19:1-SN1;	[M+H]+	VRVDEVSSPPTZQJ-YPKPFQOONA-N	536.37	ESI (+)	2.274	7960	1712	889	1830	6247	9098	1155	5881	2884	1850	4406	2482	247	58	290	195	153	215	2.7	27	41	29	52	84	1172	1441	6988	6938	6771	6959
1.56_546.35	LPC 20:3;	[M+H]+	BBNHCUBQEQJHIG-FZZJNMCHSA-N	546.355	ESI (+)	1.563	3933	3874	2191	2022	2399	3821	5264	4076	5936	6849	5960	6945	8759	9784	10585	10214	9502	10204	28	22	2.2	71	53	2.2	3152	3317	3402	3338	3576	3568
1.21_544.34	LPC 20:4;	[M+H]+	GOMVPVRDBLLHQC-VEJNOCSESA-N	544.341	ESI (+)	1.213	8597	8997	4353	4352	5361	8763	10607	8534	12260	13641	13584	15746	3855	4476	5193	5643	5136	5751	281	393	123	84	61	106	6110	6362	6868	7343	7482	7348
1.02_542.32	LPC 20:5;	[M+H]+	PDIGSOAOQOXRDU-WJPZTBRDSA-N	542.324	ESI (+)	1.018	25480	25616	14494	13111	16179	25760	26280	21614	32035	31195	33839	38543	2529	3490	5176	5452	4810	4765	2.7	45	123	27	99	61	17157	18510	20022	21357	22988	25688
1.65_454.29	LPE 16:0;	[M+H]+	YVYMBNSKXOXSKW-UHFFFAOYNA-N	454.293	ESI (+)	1.649	2503	2954	3893	2678	2694	4382	7841	6300	7799	8660	10915	9152	1772	1843	2104	2062	1747	1967	46	88	43	44	4.3	111	6375	6680	6946	7686	7125	7467
2.42_482.32	LPE 18:0;	[M+H]+		482.324	ESI (+)	2.42	7435	222	257	71	152	129	45	216	13	28	124	215	0.58	0.58	0.58	0.58	42	3435	0.58	17	0.58	0.58	0.58	48	100	111	89	126	67	9838
1.65_480.31	LPE 18:1;	[M+H]+	PYVRVRFVLRNJLY-KTKRTIGZNA-N	480.31	ESI (+)	1.654	12010	11469	8447	7572	9208	13473	4333	3827	5080	5585	5415	7399	48	45	70	172	2.25	96	76	2.25	68	2.25	23	78	3746	4440	4800	5054	5213	5902
1.35_478.29	LPE 18:2;	[M+H]+		478.295	ESI (+)	1.351	765	625	497	397	558	668	1353	1405	1779	1509	1899	1945	2103	2684	2884	2952	2833	2886	33	36	20	77	31	122	1252	1324	1439	1529	1949	1874
1.23_502.29	LPE 20:4;	[M+H]+		502.295	ESI (+)	1.226	1400	1268	419	338	867	1043	1714	1716	2141	2175	2241	2845	314	262	657	363	464	843	45	4.45	55	4.45	4.45	4.45	1381	999	1432	1523	1450	1614
4.45_678.51	PC 28:0;	[M+H]+	CITGlcJVPOWHKC-UUWRZZSWSA-N	678.51	ESI (+)	4.449	803	1219	621	153	634	1061	380	344	379	588	616	662	744	673	541	699	552	714	39	56	65	27	1.67	17	706	868	866	726	1087	1254
5.07_706.54	PC 30:0;	[M+H]+	RFVFQQWKPSOBED-PSXMRANNSA-N	706.539	ESI (+)	5.065	3074	3720	3741	2000	2666	4367	2138	2648	4677	4511	4384	4326	10746	13198	16574	17962	15513	27015	3.49	3.49	35	70	51	42	8044	9082	8970	9780	9665	10817
4.54_704.52	PC 30:1;	[M+H]+	PUSMCKGZMONNJO-MSUUIHNZNA-N	704.524	ESI (+)	4.543	4877	5587	5230	2588	4405	6661	3404	4171	5621	5736	5748	5272	2.38	595	565	652	580	742	2.38	59	85	28	41	24	5124	5504	5623	6088	6617	6867
4.91_718.54	PC 31:1 B;	[M+H]+	ISFOPOGKBOMRIJ-VXPUYCOJNA-N	718.539	ESI (+)	4.908	34470	59308	60476	29562	36611	56081	22799	21700	30898	34788	33979	33616	915.26	915.26	915.26	915.26	915.26	915.26	915.26	915.26	915.26	915.26	915.26	915.26	62545	60581	57156	54158	53022	55784
4.76_718.54	PC 31:1 A;	[M+H]+	QFVHCMLUKNHDSH-WTWBAFHPSA-N	718.538	ESI (+)	4.762	131	2924	2032	1347	2159	3151	6951	9673	12742	14188	13298	12354	2.93	40	2.93	61	65	99	29	2.93	2.93	2.93	32	2.93	7203	7187	7395	8410	8480	9478
4.42_716.52	PC 31:2;	[M+H]+	MXCARLJQIQUIGA-GJLVVWLQNA-N	716.524	ESI (+)	4.42	3892	4346	5099	2670	4118	6371	2468	3198	4325	4253	3680	3561	38	115	45	74	88	96	81	160	52	3.1	31	48	4584	4643	5546	5306	5700	6249
5.72_734.57	PC 32:0;	[M+H]+	KILNVBDSWZSGLL-KXQOOQHDSA-N	734.572	ESI (+)	5.725	21328	25201	34288	21614	28981	35720	17918	23132	26049	27513	28154	27924	130483	154445	182838	184946	163740	169572	458	129	477	211	215	322	74646	83926	88509	93683	95413	96907
5.15_732.56	PC 32:1;	[M+H]+	QIBZFHLFHCIUOT-NPBIGWJUSA-N	732.556	ESI (+)	5.152	26110	30384	39265	19115	29379	45845	71209	91530	127708	138692	131850	116107	57897	61518	71201	72650	66363	72760	71	236	227	156	44	160	94446	104183	109134	115256	118840	125977
4.65_730.54	PC 32:2;	[M+H]+	GPWHCUUIQMGELX-VHQDNGOZSA-N	730.539	ESI (+)	4.649	16878	21023	22385	9935	17591	25733	19514	23689	27875	30503	29930	26029	2518	8911	10468	10093	9609	10027	59	96	140	93	56	122	25263	27814	28558	30040	31988	34316
4.79_730.54	PC 32:2; PC 15:1-17:1;	[M+H]+	WSJLOTDHLHZMPA-GRFWKSNNNA-N	730.54	ESI (+)	4.789	39914	50304	46514	20242	40583	64320	9584	12257	15757	16553	16047	14188	3963	3132	3294	2579	2586	2366	83	136	106	75	62	74	34391	36866	39485	41951	43734	45427
5.96_748.58	PC 33:0;	[M+H]+	VQFNJMUDCGKGQK-UHFFFAOYNA-N	748.585	ESI (+)	5.963	5.17	3514	2132	1367	199	565	12047	16054	21880	23277	22795	20162	3159	3471	3704	3712	3572	3304	55	5.17	52	103	107	120	9024	10485	10832	10708	11342	11182
5.47_746.57	PC 33:1;	[M+H]+	OFRWLQSOUIZELQ-VEAYGOGPSA-N	746.569	ESI (+)	5.469	15333	15933	21660	10254	17070	26476	16931	19403	24558	28142	25465	22038	11434	12650	14114	14502	12992	13351	91	85	56	112	44	28	20672	18743	19934	19910	20749	24973
5.56_746.57	PC 33:1; PC 16:0-17:1;	[M+H]+	ASFWPRURQHKRSL-ZZEZOPTANA-N	746.572	ESI (+)	5.563	110855	167414	299040	130868	219894	337986	70381	83614	118385	125619	129864	117495	4232	3494	3962	4261	2121	2769	6.23	62	127	206	101	271	275431	302301	313121	318125	313528	296348
4.89_744.56	PC 33:2;	[M+H]+	SBNDHGBVMZMSNL-UESLNCBNSA-N	744.555	ESI (+)	4.888	5635	4105	4989	2621	4970	8201	46853	61593	84498	91159	68562	59883	236	189	213	481	836	1027	100	142	129	37	49	145	67401	70996	74309	77890	82495	89523
4.22_740.52	PC 33:4;	[M+H]+	XVWYOMARUKXDTE-WTVCTHNANA-N	740.521	ESI (+)	4.22	12687	6924	7170	3876	8746	12480	3977	4669	5880	6935	5358	5257	126	64	62	120	58	65	70	76	91	80	130	86	5142	5487	5619	8416	8821	10298
6.41_762.60	PC 34:0;	[M+H]+	PZNPLUBHRSSFHT-RRHRGVEJSA-N	762.603	ESI (+)	6.411	14844	19412	22217	9280	18363	30614	10231	12984	16645	18082	18747	15992	12992	14126	16448	16555	14918	15276	369	310	294	569	318	289	22385	25065	26982	28684	28950	30457
5.80_760.59	PC 34:1;	[M+H]+	WTJKGGKOPKCXLL-VYOBOKEXSA-N	760.587	ESI (+)	5.803	87794	95169	139340	79778	129420	188867	91619	142389	178131	174160	195575	171506	1376440	1481980	1713511	1712042	1562950	1612733	212	12.53	222	125	170	371	125507	150169	170866	179061	189377	196254
5.29_758.57	PC 34:2;	[M+H]+	JLPULHDHAOZNQI-ZTIMHPMXSA-N	758.572	ESI (+)	5.288	66581	81713	97270	54656	78069	104094	116509	136992	168074	175149	166341	156148	4156606	4266686	4689439	4627626	4348912	4443157	766	407	683	1024	1068	1046	140771	148002	150852	156156	163355	179804
5.42_758.57	PC 34:2; PC 17:1-17:1;	[M+H]+	RXPVDHQFHIMZPN-AUYXYSRINA-N	758.572	ESI (+)	5.42	851105	1062453	1463824	729527	1341179	1895386	306189	397106	510441	530719	517375	473862	642432	597247	579189	560487	490936	570838	144	147	422	285	425	821	689365	735742	763603	784314	804621	848636
5.92_756.56	PC 34:3 D;	[M+H]+	WZKKLDQPKGVESD-MXLPAPOINA-N	756.555	ESI (+)	5.92	22265	26183	17478	9017	16386	24030	17425	20044	22538	24375	23976	21619	2.58	2.58	2.58	2.58	2.58	2.58	37	27	51	26	84	45	22408	23036	23495	24172	24629	26053
4.77_756.56	PC 34:3; A	[M+H]+	VKVSSDKCKXJFIM-AFYHZPHLSA-N	756.556	ESI (+)	4.766	30360	28120	32880	14869	33563	51193	18230	27875	34871	37894	36238	31597	12983	17129	19468	18112	17712	18728	490	252	431	285	624	547	31305	34564	35204	37021	39400	44383
4.86_756.55	PC 34:3; B	[M+H]+	VKVSSDKCKXJFIM-AFYHZPHLSA-N	756.554	ESI (+)	4.856	50794	56973	64874	28529	52420	81114	23643	31074	37434	40450	38976	35002	24876	24744	28728	28493	25848	27776	293	437	449	363	347	244	35663	45091	46719	48349	52379	60741
4.96_756.55	PC 34:3; C	[M+H]+	VKVSSDKCKXJFIM-AFYHZPHLSA-N	756.554	ESI (+)	4.963	27854	56810	67913	33959	43552	57934	35326	41307	54036	57643	51029	48231	112295	106479	109044	94126	76215	61367	440	687	560	315	558	796	69295	72141	72990	71416	67556	62072
4.41_754.54	PC 34:4 A;	[M+H]+	FJCUMLVANOXIFV-QYCRHRGJNA-N	754.54	ESI (+)	4.406	24255	21464	26064	14198	26730	38630	13336	19591	21669	21969	21267	18942	454	618	807	631	753	809	419	497	314	460	142	455	13884	15365	17011	18102	19892	23978
4.54_754.54	PC 34:4 B;	[M+H]+	YWDDIWXKFJEMKF-JTZVLWBESA-N	754.538	ESI (+)	4.541	20324	24117	29114	14025	23029	35170	9219	10827	13621	14821	13476	12800	531	480	4038	4108	3952	4349	44	42	139	39	3.85	55	21249	21854	22996	24020	25090	28124
4.21_752.52	PC 34:5;	[M+H]+	LIHNYZQLMLGPSG-MFPUCXCHNA-N	752.522	ESI (+)	4.209	32220	37273	24554	12707	21029	33062	31987	40774	47909	48872	52829	48083	63	192	205	284	216	132	87	79	77	45	33	103	24605	27711	28467	29438	30620	32625
6.26_774.60	PC 35:1 B;	[M+H]+	JTVSSYNXFQGEMK-VXPUYCOJNA-N	774.603	ESI (+)	6.263	109892	142892	155133	70012	141938	243793	46106	55172	73506	77373	81356	68801	3369	686	2224	688	665	289	6.01	60	137	6.01	74	167	78445	83866	88172	91468	92963	100753
6.08_774.60	PC 35:1 A;	[M+H]+	MFHIZGSSDZJFKD-IYEJTHTFSA-N	774.602	ESI (+)	6.079	18987	23120	24454	12338	20795	34275	14387	17123	24448	25531	24884	22650	10641	11476	12881	12215	11080	11291	241	446	99	363	216	9.94	19001	20164	21304	21769	22303	24616
5.62_794.57_5.63_772.59	PC 35:2;	[M+Na]+_[M+H]+	DOPWEOPNLIWONK-LTXDKZCQNA-N	794.5674_772.5864	ESI (+)	5.6235	476208	580739	715072	332239	609161	958379	297813	388760	530802	562180	552937	470389	39999.6	41975.6	50239.6	49807.6	45244.6	48184.6	126.81	388	268.61	81.81	322	347	410030	463745	483117	491849	511869	546828
5.70_772.59	PC 35:2; PC 17:1-18:1;	[M+H]+	CWDLNVPVXRALIK-WRBBJXAJNA-N	772.587	ESI (+)	5.698	472154	590113	639469	360851	511977	608866	409094	417674	502400	596168	498123	483661	39879	34151	35651	32735	29115	35063	93	349	829	234	575	1156	559285	509413	481291	481618	505337	573033
5.02_770.57	PC 35:3;	[M+H]+	AYXGHIQPMDYMJC-AHMBLZLYSA-N	770.571	ESI (+)	5.023	11917	5800	6750	2849	7264	11821	9449	21778	23281	18205	18567	14030	2374	3858	6314	7887	8995	13953	41	124	74	29	52	160	6941	4837	12503	15839	19739	27283
5.17_770.57	PC 35:3; PC 17:1-18:2;	[M+H]+	CAVQYQUIVKHMQF-JRQMLGJJNA-N	770.57	ESI (+)	5.173	186809	215330	167308	72325	165779	274382	230843	312972	409652	443210	340475	293516	5003	5170	5629	5419	4910	5996	31	224	298	142	218	267	360626	401507	424632	445474	460207	491493
4.81_768.55	PC 35:4;	[M+H]+	OROZWUJCDDCYAU-IPUAOQJZSA-N	768.554	ESI (+)	4.812	99552	238415	225004	89927	156432	227647	79625	106743	132215	143522	126252	111109	184	123	178	243	841	4665	62	69	154	67	66	208	120095	131627	138201	145046	152702	165883
4.41_788.52_4.40_766.54	PC 35:5;	[M+Na]+_[M+H]+	KVMWXYGBIDOSLE-MJJBRJPANA-N	788.5212_766.5407	ESI (+)	4.4025	128675	118156	127817	67728	142911	217278	182051	300618	360889	351980	302496	266143	272.1	606	532	178	330	1580	1615.1	1483.1	1928	1766	1624.1	2015	139117	159309	181386	197790	220722	256038
4.17_764.52	PC 35:6;	[M+H]+	NCXHDFQFNHHMIN-YQIZYYBANA-N	764.525	ESI (+)	4.169	34185	36767	34857	18463	31321	48897	5184	6376	8313	8578	8085	7247	84	3.51	3.51	77	68	85	55	38	35	56	3.51	28	10508	11324	11364	12191	12532	14688
6.47_788.62	PC 36:1;	[M+H]+	ATHVAWFAEPLPPQ-VRDBWYNSSA-N	788.617	ESI (+)	6.468	48605	64491	55801	25995	49785	85025	31782	38120	52909	57084	58756	53933	132490	144132	169487	166934	143928	148281	148	65	259	85	109	88	40800	41555	42073	43146	44656	49626
6.09_808.59	PC 36:2;	[M+Na]+	OQIUJECZRPKREF-GJLVVWLQNA-N	808.585	ESI (+)	6.087	22786	26945	24727	9769	24862	45362	7624	10911	14242	15696	16118	13327	22717	19633	20219	19059	18780	18007	46	176	60	33	45	115	11374	14548	15664	16568	17801	18698
5.94_786.60	PC 36:2;	[M+H]+	SNKAWJBJQDLSFF-NVKMUCNASA-N	786.603	ESI (+)	5.944	88558	107595	99617	40515	86561	148798	64198	85746	113207	124532	128022	109943	2154074	2236805	2518555	2479614	2284526	2359096	112	239	229	169	206	293	84412	89708	95949	100129	107426	118837
5.33_784.59	PC 36:3; A	[M+H]+	BXRLDROZWDUSGM-ZRYFCQOPSA-N	784.587	ESI (+)	5.329	100396	115779	86017	41089	81224	119941	132898	180569	226205	233380	226156	200772	504860	517505	558607	546392	523839	542061	128	205	229	165	168	299	232518	252792	260422	276284	292771	319083
5.46_784.59	PC 36:3; B	[M+H]+	WZCLAXMADUBPSG-RIXBAXMTSA-	784.587	ESI (+)	5.461	113433	80511	73753	33887	67871	103801	60706	72788	99741	109847	102816	96013	550755	583270	680875	669946	609140	668978	102	220	72	35	62	104	99013	88615	88993	95191	89087	106556
4.86_782.57	PC 36:4; A	[M+H]+	NKQPOVROGSWLTO-NVPMBMBWSA-N	782.571	ESI (+)	4.862	107604	61192	64427	27407	106497	169708	57626	84683	114064	104828	115725	101512	86922	103613	129423	127438	114591	122489	91	291	156	258	239	318	133079	185123	193919	199219	207600	234445
5.04_782.57	PC 36:4; B	[M+H]+	IIZPXYDJLKNOIY-JXPKJXOSSA-N	782.569	ESI (+)	5.036	146514	81687	87130	39565	70888	117201	80884	136252	134794	137136	147688	138566	76845	100805	106632	118341	185701	185762	42	192	91	64	53	197	92111	99639	102979	106338	102649	98627
5.16_782.57	PC 36:4; C	[M+H]+	IIZPXYDJLKNOIY-JXPKJXOSSA-N	782.572	ESI (+)	5.161	42698	52223	48544	22231	39046	64388	30659	35396	46710	50708	47643	45200	1600611	1668727	1921171	1892173	1732103	1849778	649	237	411	174	159	255	43769	45987	46568	48295	52794	61390
4.53_780.56	PC 36:5; B	[M+H]+	SUZYROYNFNQALJ-MHEIZRSESA-N	780.556	ESI (+)	4.532	56359	48949	44569	23023	53686	86727	28671	37019	47599	51145	46862	40252	2496	2380	3059	2964	2079	3079	123	11	151	49	138	94	44395	46858	50839	52075	53852	61391
4.65_780.56	PC 36:5; C	[M+H]+	SUZYROYNFNQALJ-MHEIZRSESA-N	780.555	ESI (+)	4.646	78345	82258	83473	36089	74014	113681	29492	39369	48151	51758	50332	44150	3093	5082	5873	6102	5537	6040	180	113	189	65	162	271	53607	50443	51283	55193	59649	74736
4.79_780.55_4.79_802.54	PC 36:5; D	[M+H]+_[M+Na]+	SUZYROYNFNQALJ-MHEIZRSESA-N	780.5547_802.5363	ESI (+)	4.7935	257396	294710	294490	117211	236272	387204	283122	385287	487174	479297	536223	530619	38170	39209	46337	46152	42373	45227	70.83	198	191	276	149	314	384458	426569	454803	480521	508798	541062
4.42_778.54	PC 36:6;	[M+H]+	SPWBDEZMKCRQSX-NGPPOSSDSA-N	778.537	ESI (+)	4.425	11544	24480	24510	11178	15311	23920	10739	8827	14061	18438	12684	12894	900	933	1153	1465	1156	1486	59	36	41	3.56	3.56	87	15006	11833	12781	10501	9898	8712
4.28_778.54	PC 36:6;	[M+H]+	XXKFQTJOJZELMD-RSLAUBRINA-N	778.539	ESI (+)	4.284	64771	71157	92635	46888	84891	131239	56440	72743	88845	92365	87260	77748	85	228	301	317	108	393	3.64	51	105	36	41	151	57129	59822	62367	67167	68871	78938
6.93_802.63	PC 37:1;	[M+H]+	BWAYGZZOIHFRGU-SQFISAMPNA-N	802.632	ESI (+)	6.932	30796	44476	29124	12796	28811	49846	11554	12892	18917	19125	23815	20073	370	136	192	212	399	455	63	64	97	54	44	4.38	16298	17877	19215	19382	20411	19442
6.31_800.62	PC 37:2;	[M+H]+	MCZUABDVGPPWPM-HJTCUGKVSA-N	800.617	ESI (+)	6.309	111431	154850	126550	56618	113383	193001	63828	78200	109168	121489	124095	103437	4195	4263	4801	4804	4225	4490	12.87	134	166	276	189	129	83697	86253	87726	90025	91366	94670
5.77_798.60	PC 37:3;	[M+H]+	BWXVTXRBOSAFHO-UVQSURNNNA-N	798.604	ESI (+)	5.77	142386	139996	88306	47352	116240	175263	70179	128128	146285	133115	147018	121635	7616	7.64	7.64	9679	8668	2253	158	76	7.64	235	354	107	117555	146989	171474	186742	199302	205248
6.25_796.58	PC 37:4 B;	[M+H]+	JOMWRRWZQPAGHE-CJVGVREGNA-N	796.585	ESI (+)	6.253	13594	17003	16360	6908	15301	27576	5682	7206	9289	9855	9910	9125	7.04	7.04	7.04	7.04	7.04	7.04	93	160	150	70	74	87	7803	9040	9742	9951	10351	11165
5.42_796.58	PC 37:4 A;	[M+H]+	QRPUCJXFPYFTMB-FBFLODOBSA-N	796.583	ESI (+)	5.417	102553	189807	150659	72140	113834	150678	63733	68288	93888	113806	96560	84951	8393	8479	10354	10323	9685	10860	152	79	85	82	173	76	86266	83422	84740	86445	83718	87169
4.88_816.55	PC 37:5;	[M+Na]+	JEKFLRMFJBUQEH-MJJBRJPANA-N	816.552	ESI (+)	4.883	25909	28484	27970	10507	31174	45057	14755	22038	26525	28264	27737	23000	3.83	185	147	172	169	124	3.83	3.83	54	38	3.83	56	14110	16678	18238	18809	19012	20400
5.06_794.57	PC 37:5;	[M+H]+		794.571	ESI (+)	5.064	145729	185311	144130	64349	134303	219615	122370	116623	172157	224427	171421	160419	1545	1594	2185	2244	2254	1967	5.47	174	114	55	157	93	126551	137674	120780	120174	110824	114845
4.67_792.55	PC 37:6 A;	[M+H]+	GEINPYKZLFHHIL-GlcXMCQTSA-N	792.555	ESI (+)	4.665	1567513	1627850	1466800	651034	1439365	2092870	878497	1169782	1342762	1486659	1315542	1167000	53	277	155	1389	184	1421	43	341	631	287	320	293	1016567	1047335	1079539	1142384	1234686	1477613
5.14_792.55	PC 37:6 B;	[M+H]+	SUDSYBFAKREWFT-VBKSLSDTNA-N	792.553	ESI (+)	5.145	20638	21947	16592	7438	18748	31983	20601	30212	39347	41569	33999	28796	2.1	2.1	2.1	2.1	2.1	2.1	2.1	38	21	52	58	54	29499	35487	39785	42510	43108	46521
4.82_790.53	PC 37:7; PC 17:2-20:5;	[M+H]+		790.534	ESI (+)	4.819	8407	18293	18268	6674	11346	15663	5674	8451	9565	10320	9508	8477	3.27	114	115	230	147	74	3.27	33	42	69	49	3.27	8443	10357	10951	11131	11719	7441
7.05_776.56	PC 37:7e;	[M+H]+	JNVLVKHBDFWUGW-XXKLZNGKNA-N	776.562	ESI (+)	7.05	4764	3054	3461	2908	3629	4384	8469	9234	9844	9888	10771	10324	5.24	5.24	62	5.24	5.24	5.24	53	64	63	5.24	52	124	6993	7647	7705	7417	7696	7987
3.59_798.51	PC 38:10;	[M+H]+	JZCMIKJPTHWICS-VJUMSUAXNA-N	798.507	ESI (+)	3.591	31767	36913	33595	18103	28229	37986	1064	1368	1814	2356	2123	2028	4.01	4.01	4.01	4.01	4.01	4.01	4.01	4.01	61	4.01	40	4.01	6567	6861	7383	7198	8020	7770
6.44_814.63	PC 38:2;	[M+H]+	KXXLFCAPKGRXBT-FMJYHZMHSA-N	814.633	ESI (+)	6.443	11151	13763	12182	5069	10845	18030	2334	2637	3634	4312	4117	3489	7.08	7.08	7.08	7.08	7.08	7.08	122	71	102	163	97	184	5400	6759	8033	7665	7836	8157
6.14_812.62	PC 38:3;	[M+H]+	KNNHXKQRTYEWCA-HYYWERRFSA-N	812.618	ESI (+)	6.14	31614	34557	22367	12116	24547	41279	14272	16688	21702	22281	23200	20896	140317	149577	175802	171261	153882	160799	119	106	42	72	170	110	13029	13917	14133	15242	15093	16473
5.71_810.60	PC 38:4 B;	[M+H]+	TWXNOZDNXVHOLP-HBZIWDQGNA-N	810.602	ESI (+)	5.708	166384	233195	166663	89383	143575	191393	129076	139499	169901	183794	183451	184821	84275	80584	84536	76622	67151	73348	280	190	479	3888	1693	2813	99576	98827	94665	93223	94000	100067
5.51_810.60	PC 38:4; A	[M+H]+	PSVRFUPOQYJOOZ-QNPWAGBNSA-N	810.601	ESI (+)	5.515	146765	188620	137870	61984	124307	183180	98094	125449	172414	191771	174872	151576	30598	32201	37602	37426	33472	38123	77	190	121	50	41	119	102475	107747	110710	112757	117091	123995
5.83_810.60	PC 38:4; C	[M+H]+	PSVRFUPOQYJOOZ-QNPWAGBNSA-N	810.602	ESI (+)	5.834	37087	47877	30114	12504	27219	44743	22467	28689	37195	40115	40371	35637	961756	993982	1144176	1129860	1040661	1092482	84	47	99	78	39	62	23680	25248	26837	28751	31082	34762
5.10_808.59	PC 38:5;	[M+H]+		808.586	ESI (+)	5.102	82424	149768	106377	45002	109920	182231	120392	154342	204676	218249	216908	191719	34449	29221	31712	26210	18866	18211	55	194	145	38	148	92	98896	107370	110839	117845	119476	132285
5.23_808.59	PC 38:5; A	[M+H]+	SUACBSWYGWBPFC-GPUJSUHJSA-N	808.586	ESI (+)	5.23	77573	100898	69591	34763	60625	90406	75349	81614	113560	125420	106328	98486	290684	292834	327425	319238	291919	302366	34	1.52	1.52	1.52	15	1.52	82499	80096	81889	80627	82197	85409
5.39_808.59	PC 38:5; B	[M+H]+	YLWBKBDNHWQEFU-YJXJLLHLSA-N	808.588	ESI (+)	5.388	471372	532501	379048	177697	353575	512864	245323	317714	381991	388471	442573	405283	89072	88174	103030	122099	113622	126171	117	185	164	159	254	11.71	266886	285295	297416	311956	319596	340244
4.63_806.57	PC 38:6;	[M+H]+	FDZLIRJUPNZIMY-IQAYYXADNA-N	806.571	ESI (+)	4.63	151126	161039	95485	39107	102728	154740	95891	130987	154915	171861	150424	132106	431	364	572	492	616	808	7.77	84	260	94	78	173	107255	108033	112499	119807	128686	156494
4.85_828.55_4.84_806.57	PC 38:6;	[M+Na]+_[M+H]+		828.5508_806.5702	ESI (+)	4.845	689290	784286	592587	261654	574744	874191	626906	848623	1062109	1097296	1147898	1028903	29953	30902	35448	20664	18078	14233	90	392	517	133	408	372	594012	648847	685585	719577	758267	825620
5.02_806.57	PC 38:6; B	[M+H]+	PLZBTDKJYHXIEW-DZUXOTHRSA-N	806.57	ESI (+)	5.017	86354	61872	40321	17584	27139	44303	43362	38403	57074	72480	65279	62457	477240	695172	1122908	1363584	1469143	1682651	48	137	108	76	161	105	50188	44003	40313	40172	36692	40795
5.35_806.57	PC 38:6; C	[M+H]+	PLZBTDKJYHXIEW-DZUXOTHRSA-N	806.568	ESI (+)	5.349	13859	15916	12078	6942	11682	15714	15888	21876	25801	24858	26886	23325	40278	43116	49334	47014	45662	45947	4.15	99	97	683	42	75	22226	25155	26403	28562	29526	31636
5.71_792.59	PC 38:6e;	[M+H]+	LYVCXQZOQYYLAM-YQIZYYBANA-N	792.592	ESI (+)	5.711	57754	75122	48338	28316	44868	60817	11068	12837	16081	16250	19325	19169	12700	13164	14989	14666	12554	13811	8.02	8.02	87	95	126	80	20715	21415	21737	22124	21929	22146
4.40_826.54	PC 38:7;	[M+Na]+	WIAGLFABVRSFHG-MWVIWIHDNA-N	826.538	ESI (+)	4.399	23659	20453	12803	6511	15788	25276	18078	33500	38629	36195	34072	27871	4.12	4.12	4.12	4.12	4.12	4.12	72	41	47	4.12	62	96	21650	28630	33164	36803	41806	46748
4.11_802.54	PC 38:8;	[M+H]+	GQTMDGAVIYVIDL-RVTNGMKENA-N	802.538	ESI (+)	4.11	79015	210633	141421	69085	84568	127551	78276	97076	112282	119805	104807	91101	8.08	8.08	8.08	8.08	8.08	8.08	125	81	191	88	178	130	91748	96637	98000	101075	106534	118683
3.79_800.52	PC 38:9;	[M+H]+	JKQQGFLBFJQGQB-WUIWXDHENA-N	800.524	ESI (+)	3.795	143898	150896	147718	68307	112578	170665	26009	32539	30800	33519	29621	27724	4.44	4.44	4.44	4.44	4.44	4.44	44	165	49	58	122	68	40070	42759	44495	46741	50827	56080
5.96_824.62	PC 39:4;	[M+H]+	LYQSNFRIABTCGD-XURQRYAJNA-N	824.617	ESI (+)	5.961	79878	94842	56325	22862	62700	108718	30989	45444	59419	63226	65138	52555	4.81	4.81	4.81	4.81	4.81	4.81	56	82	4.81	48	79	95	31495	34515	37407	40990	42858	46110
5.53_844.58_5.53_822.60	PC 39:5 A;	[M+Na]+_[M+H]+	LGGLGFSWJITMHS-MJJBRJPANA-N	844.5814_822.6024	ESI (+)	5.528	271929	337051	219241	93995	232975	353225	122099	162697	199153	221597	215004	183346	1067	985	1046.15	685.15	1074.15	917.15	148	118	98.15	87	46.15	22.15	122675	127436	132774	138126	140866	151091
5.71_822.60	PC 39:5 B;	[M+H]+	WTCGUHFZPZSPIQ-QIEOLGCNNA-N	822.602	ESI (+)	5.708	152399	200723	104857	56660	103006	136391	82836	93334	117149	135178	106783	99925	2966	2291	1680	1837	1494	2247	176	185	109	133	104	10.39	104704	102015	98376	97224	96781	101436
5.24_820.59_5.26_842.57	PC 39:6;	[M+H]+_[M+Na]+	QMCWOGICYCFNBF-BWHZRABLSA-N	820.5855_842.5695	ESI (+)	5.2525	986262	1222640	765339	429593	766343	1087027	590568	686970	810648	882368	833129	764127	17.45	17.45	809	407.66	265.79	573.79	119.66	397	659	113.79	492.79	249.79	623791	646178	660762	664425	675785	679749
5.71_806.59	PC 39:6e;	[M+H]+	DXWGFBUOPNZQDM-YQIZYYBANA-N	806.586	ESI (+)	5.71	8019	11709	397	1775	1522	3443	6950	7377	9005	9673	8825	8397	3681	5171	4896	4712	5044	5928	4.11	145	41	147	96	56	8575	7897	7785	7242	5067	8066
5.32_818.57	PC 39:7;	[M+H]+	BUUSHDUVBYKLEA-NDXBRMGJNA-N	818.568	ESI (+)	5.32	24673	25157	21114	11378	23401	31911	10356	13775	16916	16517	16977	15622	9.28	9.28	9.28	9.28	9.28	9.28	9.28	93	9.28	9.28	9.28	9.28	10385	12610	12906	13143	13681	13930
3.97_826.54	PC 40:10; PC 20:5-20:5;	[M+H]+	WAIHGVAZVKEQGR-IYICPNJGNA-N	826.54	ESI (+)	3.972	935391	1068338	603970	275033	639716	1015673	523701	734092	933053	903776	876670	798205	9.06	9.06	9.06	9.06	9.06	9.06	91	167	512	160	403	392	437952	478927	501951	530439	553322	605587
6.36_838.63	PC 40:4;	[M+H]+	FHUAYOMRHXZKHT-JUGJLYODSA-N	838.631	ESI (+)	6.36	4906	6891	3458	778	3781	5665	2668	3058	3559	4694	4792	4007	13942	14864	17341	16027	14875	15336	78	47	39	41	48	45	472	466	906	958	1062	1598
5.71_836.61	PC 40:5;	[M+H]+	JGFAVBBHEMWTRE-KBOMSAHWNA-N	836.613	ESI (+)	5.715	16881	21617	12707	7355	13091	17259	7274	8801	10094	10967	11531	10801	36732	36129	37820	34432	29700	30369	143	98	160	206	311	301	8975	9280	9399	9069	9235	9914
5.87_836.62	PC 40:5; A	[M+H]+	IJTJDJOOHZVSAC-NDRUHXFFSA-N	836.617	ESI (+)	5.869	3415	5116	2955	932	2888	4785	1320	1885	2249	2198	2581	2008	54226	56805	66343	64727	58557	62561	67	55	123	4.59	46	4.59	1284	1795	2186	2486	2062	2410
6.08_836.62	PC 40:5; B	[M+H]+	SFESOYFQZQJCOY-FXYWPAEZSA-N	836.615	ESI (+)	6.08	11128	14415	7544	3173	7691	12183	6826	8447	10838	11501	12708	11278	8613	17002	19811	20150	18030	19111	53	106	36	32	41	43	6376	7045	7276	7498	8337	8410
5.19_834.60	PC 40:6;	[M+H]+	SUSAZHLUBGMSDJ-RSLAUBRINA-N	834.601	ESI (+)	5.186	31010	42372	22864	10335	23092	36439	18457	21158	30461	33748	27437	25500	4388	4236	5126	5532	5644	7764	62	63	47	48	30	38	16972	16795	16842	17039	18023	19197
5.35_834.60	PC 40:6; A	[M+H]+	KZSXWBSDQDXESU-PPEVQBTRSA-N	834.601	ESI (+)	5.349	13165	12588	7258	2858	7657	11102	4067	5177	7036	8452	6874	6353	9460	9730	10952	10558	9900	11001	4.08	62	41	4.08	4.08	4.08	7280	7006	6708	7333	7693	9940
5.70_834.60	PC 40:6; B	[M+H]+	TYRTWVKQVGNGSZ-RGBTVBCDSA-N	834.601	ESI (+)	5.698	4372	6010	3165	2133	3091	4231	2849	2746	3267	3979	2730	3305	197916	191483	199561	173732	143384	146269	120	210	306	66	365	67	3327	3024	2699	2249	3026	3484
5.52_832.58	PC 40:7;	[M+H]+	QBYZNPMMLNWRFB-BOTVMSBBNA-N	832.582	ESI (+)	5.523	12575	14896	10778	6435	10546	14090	10535	13367	17648	17323	17629	15341	2746	2952	3288	3637	3032	3625	81	2.7	27	40	2.7	86	9278	10500	10571	11369	11278	11502
4.78_832.58	PC 40:7;	[M+H]+	QFOVTMHNARYFIU-HYOAFMAGNA-N	832.583	ESI (+)	4.775	84808	95603	54701	22514	65450	106452	52642	71753	94895	99542	89186	80173	37	304	899	887	996	1360	76	37	33	57	37	116	4843	36619	40074	43044	44119	48143
4.90_832.59	PC 40:7; A	[M+H]+	BPUROMFCPFGBOT-ZEGPSQTJSA-N	832.586	ESI (+)	4.896	60737	41665	27160	11943	42947	68177	23023	37331	40010	41015	35674	30825	876	1093	1012	1026	1676	3147	5.25	65	103	53	135	120	21151	24840	29340	36474	60841	69112
5.04_832.58	PC 40:7; B	[M+H]+	BPUROMFCPFGBOT-ZEGPSQTJSA-N	832.584	ESI (+)	5.037	10460	21265	11175	4786	8515	12956	11582	8490	13734	20138	13448	13810	4884	13035	9583	12614	17538	45790	42	52	4.18	58	77	80	14152	12575	11136	12117	9240	9672
4.53_830.57	PC 40:8;	[M+H]+	SIMZOWLEIOYZJX-VRCXRDLJSA-N	830.57	ESI (+)	4.531	244653	285434	154178	66405	169827	282658	167105	222069	300781	323465	252063	223223	163	103	7.22	264	535	284	7.22	91	144	72	85	82	121117	131530	140229	147958	155717	175285
4.18_828.55	PC 40:9;	[M+H]+	GQEIDTJKSFOXAW-KRQMUKPXNA-N	828.555	ESI (+)	4.178	289304	322305	190115	86596	217721	366400	251662	342675	422396	436765	408800	366754	133	4.66	4.66	4.66	4.66	4.66	47	160	226	66	217	198	135123	146478	158899	163710	174103	196904
5.92_848.61	PC 41:6;	[M+H]+	RBYPBORRGVPCBA-VBKSLSDTNA-N	848.615	ESI (+)	5.916	4867	6489	2250	1512	3453	5515	2694	3537	4849	5089	5711	5143	5.22	5.22	5.22	5.22	5.22	5.22	70	5.22	5.22	5.22	5.22	52	3087	3343	3726	3482	3682	3677
6.14_794.61	PC p-38:4/PC o-38:5; B	[M+H]+	DYFGXBAIDOATAE-DSLLYOFSSA-N	794.608	ESI (+)	6.144	5777	6726	4494	2798	3811	1091	2606	3204	2817	4065	1945	3124	13644	14579	17468	16457	15171	16512	830	484	453	578	537	772	3033	3109	2769	2158	3308	249
5.26_790.57	PC p-38:6/PC o-38:7;	[M+H]+		790.573	ESI (+)	5.264	3071	3180	1481	7.33	257	2435	1159	439	701	812	696	243	12956	12788	14110	14401	13252	13768	235	281	73	92	84	263	1785	1108	1756	1490	1335	1740
5.18_664.49	PE 30:0;	[M+H]+	SKVKIGSFTGVBOX-UHFFFAOYNA-N	664.491	ESI (+)	5.183	26611	29346	18358	10685	16134	22821	3682	4166	4600	4819	5838	5687	72	4.29	64	109	48	107	72	43	134	51	69	67	11495	11658	12243	12362	13062	14344
5.42_678.51	PE 31:0;	[M+H]+	GHUNMROMRGQXEW-UHFFFAOYNA-N	678.509	ESI (+)	5.422	1978	2482	2214	1337	1651	2274	13383	14964	18801	19030	22273	20784	61	77	41	103	40	54	31	36	125	44	31	80	11750	11047	12029	12165	12727	12884
5.01_676.49	PE 31:1;	[M+H]+	PANXRHFVSBWSKV-NXVVXOECNA-N	676.491	ESI (+)	5.013	10924	9411	9500	6227	9070	12273	13048	14812	14344	15513	17371	16944	3.45	3.45	3.45	3.45	3.45	3.45	3.45	35	83	111	86	3.45	15934	16289	16427	17041	17912	25228
5.85_692.52	PE 32:0;	[M+H]+	SLKDGVPOSSLUAI-UHFFFAOYNA-N	692.523	ESI (+)	5.85	24985	29134	20914	12920	18907	26842	9592	10441	11916	13267	15963	14409	163	103	208	102	113	80	113	34	245	79	59	128	33195	33615	34747	35330	36141	38694
5.28_712.49	PE 32:1;	[M+Na]+	NCECDDUAGKJXMQ-NXVVXOECNA-N	712.489	ESI (+)	5.275	2148	583	3191	1144	2734	3477	5661	6107	6647	7078	7238	7177	52	124	45	4.32	43	122	58	4.32	93	81	86	89	5601	5832	6191	6214	6218	5919
5.28_690.51	PE 32:1; PE 16:0-16:1;	[M+H]+	CZOSTDZGCCEZTJ-PEZBUJJGNA-N	690.509	ESI (+)	5.275	22700	26039	35469	20142	29764	42282	59341	68573	80547	86975	88553	82755	99	4.92	146	203	188	311	49	70	191	160	74	162	63536	66217	68921	69823	72576	76075
5.50_704.52	PE 33:1;	[M+H]+	HPHKBIBKNIIZJX-PEZBUJJGNA-N	704.523	ESI (+)	5.501	2350	1731	1506	1451	2074	3174	11616	13836	16947	17274	20542	19407	3.75	3.75	3.75	3.75	3.75	3.75	51	75	65	38	53	99	9690	9702	10077	10172	10619	12577
5.69_726.51	PE 33:1;	[M+Na]+	SYBHTSUHRWDZPE-MSUUIHNZNA-N	726.506	ESI (+)	5.691	3186	5.99	13011	9211	11919	15587	8642	9359	9758	9904	11854	10744	5.99	5.99	5.99	5.99	5.99	5.99	5.99	79	109	79	90	60	14378	16144	17218	17657	18133	15936
5.70_704.52	PE 33:1; PE 16:0-17:1;	[M+H]+	CBDUTJYWWDMHBN-ICFOKQHNNA-N	704.524	ESI (+)	5.704	148437	178205	250097	139791	206424	290642	125994	139204	161262	173331	178862	166429	6.1	6.1	6.1	6.1	6.1	6.1	61	140	450	449	258	560	288531	298622	301447	308086	318667	340444
5.00_702.51	PE 33:2;	[M+H]+	IWXDLCLJKFWDAC-BIXSNLIQNA-N	702.508	ESI (+)	4.995	519	6.91	159	389	406	516	7646	15342	11450	11120	11709	10543	6.91	6.91	6.91	6.91	6.91	6.91	6.91	110	117	118	69	117	7430	8239	10105	12243	16177	23687
4.67_700.49	PE 33:3;	[M+H]+	KNHJBRDIAYYLLA-YYPVPKODNA-N	700.491	ESI (+)	4.665	2007	2617	2857	1663	2798	3601	3146	3767	4725	4743	4732	4089	3.03	3.03	60	3.03	3.03	3.03	62	30	63	51	40	72	3268	3752	3313	3412	3665	3947
5.93_718.54	PE 34:1;	[M+H]+	WXLSQXFDJJJVOP-NXVVXOECNA-N	718.539	ESI (+)	5.927	81865	99229	119660	68286	94603	134195	111930	122896	144338	157805	172080	160417	5761.21	5761.21	5761.21	5761.21	5761.21	5761.21	5761.21	5761.21	5761.21	5761.21	5761.21	5761.21	132141	134067	135865	138452	141265	150684
6.90_704.56	PE 34:1e; PE 18:1e/16:0;	[M+H]+	KJDVLWWPMOBWGU-ZCXUNETKNA-N	704.56	ESI (+)	6.897	3435	3909	3685	2062	3246	4551	1724	1752	2429	2188	2957	2933	210	114	489	184	188	224	61	44	28	87	30	69	6419	6325	6349	6824	6447	7127
5.55_738.51	PE 34:2;	[M+Na]+	CDSZJQOSKHJRHE-QGLGPCELNA-N	738.507	ESI (+)	5.553	8254	8450	11255	8318	11412	13084	9121	10772	10911	11731	11864	10041	55	4.48	154	50	45	126	78	94	122	4.48	79	82	11070	12012	12284	12102	13356	13425
5.42_716.52	PE 34:2;	[M+H]+	HBZNVZIRJWODIB-NHCUFCNUSA-N	716.524	ESI (+)	5.422	23487	27782	26773	15504	23136	33002	70968	82711	91823	100730	102307	95070	5247	5772	6472	6236	5461	5934	44	143	184	117	131	118	69011	73578	75195	78306	79212	83876
4.98_714.51	PE 34:3;	[M+H]+	JROJTBFOFYPTCC-QQQLBLNKNA-N	714.507	ESI (+)	4.977	22569	14338	15075	10845	20324	25345	9779	15344	13983	12889	17213	15424	984	138	416	460	810	316	5.15	52	5.15	80	230	5.15	11666	14345	16379	21160	22019	23099
4.63_712.49	PE 34:4;	[M+H]+	YMZSXNDSMIKBOB-DFIVFKFMNA-N	712.49	ESI (+)	4.632	7907	5279	11615	6439	9422	13976	1472	3634	3682	1849	2338	2138	2.98	2.98	45	2.98	2.98	2.98	30	109	30	59	61	55	2976	8989	8848	9642	10027	11279
4.31_710.48	PE 34:5;	[M+H]+	SANFFXURDRRADQ-TYBQXOFFNA-N	710.476	ESI (+)	4.307	2805	3238	2860	1696	2426	3249	3790	4730	5255	5537	5670	5568	1.49	39	26	1.49	1.49	46	59	29	40	1.49	1.49	15	3944	3829	4053	4158	4368	4513
6.78_734.57	PE 35:0;	[M+H]+	BVUGKPHEIXBNKM-UHFFFAOYNA-N	734.57	ESI (+)	6.778	2486	2851	2112	1162	1749	2507	4942	5294	7004	7687	7776	7170	203	147	202	157	118	263	1.23	52	1.23	45	12	62	4035	4441	4040	4573	4733	4806
6.38_732.56	PE 35:1 B;	[M+H]+	CSGIGSOZYMYFOM-VLGSPTGONA-N	732.555	ESI (+)	6.383	283074	345176	327174	178577	299768	440788	183211	196194	224214	244172	250783	223173	10.11	10.11	10.11	10.11	10.11	192	138	101	792	419	401	950	216793	220749	223471	229334	235354	248758
6.15_732.55	PE 35:1 A;	[M+H]+	JKNRVUASURIXEH-HNENSFHCNA-N	732.554	ESI (+)	6.152	12514	15187	12278	7617	9766	12754	22078	23726	29092	31079	35126	34275	238	353	146	307	5.98	127	5.98	136	63	60	110	213	24639	24072	24904	25061	26246	27556
5.75_730.54	PE 35:2;	[M+H]+	UJCJWIHZUHMDIT-OHNCOSGTNA-N	730.539	ESI (+)	5.746	142456	165885	206336	119220	188549	269516	85603	101313	113805	118364	135296	123634	7.95	211	7.95	7.95	7.95	7.95	80	89	403	121	115	339	105901	111786	116474	119250	124597	130191
4.89_726.51	PE 35:4;	[M+H]+	UMUZPMAFBANKAA-WNXRHBFNNA-N	726.508	ESI (+)	4.892	6921	7775	7364	4653	7105	9803	5898	11769	11119	8718	9050	7856	60	38	3.83	3.83	3.83	3.83	3.83	78	136	80	78	68	5541	6256	7111	8140	9206	11558
7.21_748.59	PE 36:0;	[M+H]+	LVNGJLRDBYCPGB-UHFFFAOYNA-N	748.586	ESI (+)	7.21	5457	5747	4891	3408	4667	5942	2941	3141	3136	3426	3940	3863	671	600	597	1040	688	727	1266	1295	1317	1259	1278	1436	3844	4255	3923	4187	3982	4466
6.59_746.57	PE 36:1;	[M+H]+	JQKOHRZNEOQNJE-ZZEZOPTASA-N	746.571	ESI (+)	6.587	248249	313616	270537	146725	248260	355868	82140	86482	106589	113705	135862	128051	4.4	2357	1827	1413	1052	2080	44	300	411	142	92	661	109334	109287	109845	113362	114859	120966
7.04_732.59	PE 36:1e;	[M+H]+	GEUFEEGHURWAPV-ZPHPHTNENA-N	732.591	ESI (+)	7.044	71060	92298	54050	31682	51527	72437	161061	169859	218288	236755	265630	241702	104	225	211	263	114	175	3.92	164	457	39	49	314	134962	138404	140471	142159	140447	144937
6.09_744.56	PE 36:2;	[M+H]+		744.556	ESI (+)	6.089	76951	93264	64073	35478	61335	89354	100051	110127	127715	136794	135221	125934	9.51	9.51	9.51	9.51	9.51	2376	9.51	124	237	95	212	273	104818	105521	106898	109610	111618	120877
5.73_742.54	PE 36:3;	[M+H]+	GBEKFOMBLGMULW-NKTIKPMXNA-N	742.54	ESI (+)	5.729	21198	26309	28627	16680	25178	34161	25744	30554	31937	34381	35285	31978	8.46	8.46	8.46	8.46	8.46	8.46	8.46	85	94	8.46	8.46	8.46	30457	31727	32933	33269	34703	37441
5.46_742.54	PE 36:3;	[M+H]+	GKAFCSRKMWFPSJ-RQOIEFAZNA-N	742.539	ESI (+)	5.465	26174	30940	23606	12584	21599	30816	32637	36015	40734	43505	49468	45779	3088	2938	2943	2960	2890	2836	8.71	87	208	112	8.71	153	38753	40135	40634	42352	43509	46291
5.16_740.52	PE 36:4;	[M+H]+		740.522	ESI (+)	5.158	20178	22486	24574	13604	20208	29634	38361	42801	50239	54650	55368	50869	4.66	4.66	4.66	4.66	4.66	4.66	79	196	49	47	81	92	28144	29902	30283	31773	32311	35566
6.05_726.54	PE 36:4e; PE 18:1e/18:3;	[M+H]+	MZVVECFOMNGMBI-XEKZTXPJNA-N	726.544	ESI (+)	6.052	5249	8420	6784	3523	5611	7745	4245	4704	5718	5719	6257	6155	356	410	458	348	141	133	3.91	87	77	39	3.91	3.91	8154	8254	7974	8022	8429	8885
4.87_760.49_4.88_738.51	PE 36:5;	[M+Na]+_[M+H]+	JCNAQIRJJNTDND-GJCLIZKUNA-N	760.4902_738.5081	ESI (+)	4.873	141041	46057	218159	120121	181120	263351	151981	172462	215514	224624	209846	196048	143.11	143	66.11	311	227.11	264	103	198	274	118.11	206.11	558	49478	258226	263468	269685	279886	308184
7.05_760.59	PE 37:1;	[M+H]+	AHZWSXIVPHUMBV-VZCXRCSSNA-N	760.586	ESI (+)	7.051	58015	73589	54738	30858	51007	71660	38280	38111	46900	52806	50594	44817	1910	1821	1800	1922	1594	1914	169	112	139	170	185	245	43547	43960	42760	44431	44023	46029
6.41_758.57	PE 37:2;	[M+H]+	VYGBMMLRWMCCRC-AUYXYSRINA-N	758.57	ESI (+)	6.411	86497	104850	88225	47179	81596	119690	31633	35249	39202	44698	50973	45726	5005	4448	5218	5639	4584	5734	56	67	102	26	136	238	42382	42538	43701	44400	45418	48372
7.40_744.59	PE 37:2e; PE 18:1e/19:1;	[M+H]+	SGQUEMOCROIZTH-AUYXYSRINA-N	744.589	ESI (+)	7.4	23105	29475	16786	9908	17717	24205	11739	12404	14159	15638	16110	15084	2.76	131	268	156	261	205	98	28	55	43	98	198	16348	17296	17035	16501	17291	17801
5.12_774.51_5.15_752.52	PE 37:5;	[M+Na]+_[M+H]+	BLBRHCZNYLMSHU-TYBQXOFFNA-N	774.5081_752.5236	ESI (+)	5.1355	69441.1	29923.1	25335.1	14144.1	21152.1	29785.1	64657	78270	92039	100216	90190	82917	6.35	54.29	6.35	6.35	6.35	6.35	85	85.06	235	36.06	142	80.06	81249	85002	87763	90319	91479	58207
4.74_750.51	PE 37:6;	[M+H]+	VAZQJASBUKQADX-ZUQDXNQYNA-N	750.508	ESI (+)	4.741	43846	47523	51085	28697	48213	72042	17577	21667	23313	25595	25042	24144	4	4	4	4	4	4	106	46	46	4	40	43	27883	28277	29484	29490	31251	34418
7.25_774.60	PE 38:1;	[M+H]+	VDNXNFMAFDYQSI-UZYVYHOENA-N	774.602	ESI (+)	7.253	20874	25345	20057	11360	18647	25682	6607	6921	9067	9541	10826	9583	3.56	73	161	161	95	80	36	48	165	71	89	68	10364	10054	10398	10260	10140	10719
6.76_772.59	PE 38:2;	[M+H]+	WYDGEVICLIVPEG-OHNCOSGTNA-N	772.588	ESI (+)	6.764	5.37	14269	8964	5008	5.37	5.37	7334	8017	9927	10251	10392	9788	5.37	5.37	5.37	5.37	5.37	5.37	71	116	54	61	105	114	12730	12896	13076	13461	13783	14731
7.56_758.61	PE 38:2e; PE 18:1e/20:1;	[M+H]+	QEVTZYOGQJVUDJ-CLFAGFIQNA-N	758.607	ESI (+)	7.563	6896	8922	5171	2891	5270	7499	2846	3093	3431	3585	3829	3808	1.09	1.09	1.09	1.09	1.09	1.09	54	39	54	11	81	91	4543	4817	4844	4568	5020	5293
6.26_770.57	PE 38:3;	[M+H]+	MSYFXMJDQLPRGO-JTBMWNAQNA-N	770.571	ESI (+)	6.264	54547	67432	45186	25529	43306	63918	45596	49201	58596	61877	57932	51976	6.43	6.43	6.43	6.43	6.43	6.43	6.43	64	91	72	81	180	28716	31125	30702	31711	32054	35203
5.98_768.55	PE 38:4;	[M+H]+	ANRKEHNWXKCXDB-BHFWLYLHSA-N	768.554	ESI (+)	5.977	25637	30126	24161	14133	22920	33399	20224	22741	27741	30353	26803	24021	11009	8574	13798	20711	13948	14382	43	81	60	4.34	141	58	23523	24506	24440	25531	25634	27568
5.52_788.52_5.52_766.54	PE 38:5;	[M+Na]+_[M+H]+	PWHXKCAZXPQXCE-GJCLIZKUNA-N	788.5219_766.5397	ESI (+)	5.519	589597	668508	628997	365411	566809	840379	359414	425454	499278	537098	520976	473732	11.49	11.49	11.49	11.49	11.49	11.49	115	95.6	567.6	124.6	530	369.6	491966	514236	525204	533482	539399	564454
4.92_764.52_4.91_786.52	PE 38:6;	[M+H]+_[M+Na]+	AMKOUQLHUASJMB-HHHWHCSPNA-N	764.5231_786.5225	ESI (+)	4.914	94325	41883	215881	137671	140571	203762	9211	115232	170810	13878	171368	169376	316	14.36	378	175.07	387.07	14.36	73.29	129.07	290	179	144	130.07	9417	15178	32952	40527	143533	98451
5.16_764.53	PE 38:6;	[M+H]+	LFGBKOUQHCWBQI-BZGLIJSBSA-N	764.526	ESI (+)	5.156	1094	2981	3555	1506	2433	2301	1944	2214	2262	2811	2400	2306	6141	6103	6868	6666	6278	6725	5.51	5.51	5.51	5.51	73	55	2459	1575	2299	2044	2091	2226
4.49_762.51	PE 38:7;	[M+H]+	QODZEAYHCXHUBO-IDRUDCOLNA-N	762.508	ESI (+)	4.49	10590	11552	8406	4712	7868	12249	7350	8853	10254	10828	10078	9568	47	87	81	82	69	49	52	3.15	32	3.15	45	3.15	11127	11791	11801	12128	12224	14555
4.18_760.49	PE 38:8;	[M+H]+	MAGRBNJLYFSNAS-NUFLOQEGNA-N	760.49	ESI (+)	4.177	4487	4094	4005	2361	3821	5787	2775	3500	3663	3989	3701	3611	46	52	2.57	2.57	2.57	2.57	28	53	87	26	2.57	36	3654	4241	4237	4200	4530	5004
7.72_788.62	PE 39:1;	[M+H]+	WRZPTRWGOGEXQL-VXPUYCOJNA-N	788.617	ESI (+)	7.717	8269	9963	7968	4680	7881	10656	5647	6105	8829	9645	7640	7109	414	164	160	204	1.7	228	1.7	56	53	54	62	17	10950	11139	11244	11468	10960	12440
5.38_778.54	PE 39:6;	[M+H]+		778.54	ESI (+)	5.385	55640	64263	53884	26858	48376	72924	16489	19066	21403	24077	25293	22701	253	237	4.26	346	4.26	4.26	43	142	98	83	103	49	26831	28098	28910	29897	30263	32658
4.04_784.49	PE 40:10;	[M+H]+	IHTIZXOEIOXSDI-LPEZNXMBNA-N	784.495	ESI (+)	4.035	14495	15371	11111	6622	11357	17130	5403	7218	8308	8440	7823	7785	86	4.81	78	55	4.81	4.81	96	50	76	48	4.81	4.81	7280	7156	7440	7721	8081	8829
7.43_800.62	PE 40:2;	[M+H]+	AVMFGZANRFUACW-QGLGPCELNA-N	800.617	ESI (+)	7.435	2331	2954	1746	1065	1980	2552	1862	1731	2680	3015	2612	2577	4.58	4.58	4.58	4.58	104	4.58	4.58	48	46	4.58	47	61	5114	5398	5300	5345	5637	5953
6.21_794.57	PE 40:5;	[M+H]+	NTHPSQLWGPHVCL-REJVNYKHNA-N	794.571	ESI (+)	6.208	22352	26357	19301	10494	18245	25749	11493	12537	17135	18377	15783	14522	4.48	4.48	4.48	4.48	4.48	4.48	113	145	63	4.48	4.48	45	17783	18149	18259	18500	18447	20305
4.26_786.51	PE 40:9;	[M+H]+	UQSFZGNZGJKJNY-LCRMAATCNA-N	786.506	ESI (+)	4.263	10425	10242	8064	4832	8826	11859	7090	9151	10785	10765	10346	9781	2.8	2.8	2.8	2.8	2.8	2.8	54	32	35	35	2.8	28	1469	6381	6606	6558	6953	7642
6.84_822.61	PE 42:5;	[M+H]+	DHCDADROYBHFQW-YOJOTYGRNA-N	822.61	ESI (+)	6.844	7951	9973	6472	3623	5834	8826	2518	2988	3880	4037	3836	3499	3.55	3.55	3.55	3.55	3.55	3.55	36	69	3.55	67	45	3.55	4775	4988	5115	5240	5209	5206
6.29_702.54	PE p-34:1/PE o-34:2;	[M+H]+	SMPXBIVJXNXOAL-PRWZWGSOSA-N	702.544	ESI (+)	6.285	9769	11604	10777	6351	10115	14566	4775	4967	6091	6034	6892	7160	1522	1397	1568	1221	1238	1526	132	72	94	40	55	55	8699	8467	8751	8885	9108	9629
6.93_730.58	PE p-36:1/PE o-36:2;	[M+H]+		730.577	ESI (+)	6.935	276294	346856	241812	134279	228025	335234	175931	184299	236425	244547	285928	275504	1443	1352	1422	1550	1326	1777	68	290	616	188	349	277	235319	244875	247986	252117	257671	266608
6.43_728.56	PE p-36:2/PE o-36:3;	[M+H]+	CFANDHZPOSNKNO-UDHSZFGOSA-N	728.56	ESI (+)	6.429	44276	53373	32055	18434	32442	48496	61937	65421	82234	83809	87505	85774	6451	6853	7475	7159	6733	7366	60	6.04	83	123	130	131	101857	105528	107750	109620	112453	118894
5.58_724.53	PE p-36:4/PE o-36:5;	[M+H]+	ADWDFBQPQIEGRZ-XBICFDGKSA-N	724.528	ESI (+)	5.575	7839	9943	6724	3342	6060	9392	859	986	1371	737	1403	1777	3188	2270	19988	5672	18717	19711	4.02	61	124	40	52	88	2906	2789	2848	3234	3211	3432
6.30_752.56	PE p-38:4/PE o-38:5;	[M+H]+	ZTZQZGHJLWFLFQ-VZBWJDOASA-N	752.56	ESI (+)	6.3	15552	18363	13251	8600	12588	16312	28125	29422	36178	39567	33172	30852	27951	27578	29878	29553	27643	29481	2126	1672	1845	1685	1862	1695	28329	29430	29158	28827	29908	32741
5.69_750.55	PE p-38:5/PE o-38:6;	[M+H]+	IQSPCSIULMCRPM-ZAJUHDLGSA-N	750.545	ESI (+)	5.69	329	514	507	418	406	504	693	194	548	551	698	465	15607	14958	17000	16351	14528	15709	183	118	89	170	131	105	499	627	942	577	721	299
6.29_778.57	PE p-40:5/PE o-40:6;	[M+H]+	HHQFKPJXVYWLLJ-ABYSKWQHSA-N	778.573	ESI (+)	6.286	6.47	6.47	468	319	6.47	6.47	853	733	673	620	650	661	2191	1523	2846	2908	2376	2663	110	267	140	94	65	228	394	313	256	6.47	6.47	283
4.63_907.53	PI 38:5;	[M+Na]+	FRECHIGMANZWMF-REJVNYKHNA-N	907.532	ESI (+)	4.631	24071	25571	22542	16147	22508	25977	17390	18837	19428	19591	23138	21595	313	260	464	453	511	103	4.63	34	133	46	49	81	20189	23119	22822	23070	23966	24568
4.18_905.51	PI 38:6;	[M+Na]+	FPHAZHKZJQOPBU-LGFBOSHVNA-N	905.513	ESI (+)	4.18	3482	3723	3299	2089	3163	4019	4316	5014	5370	5627	6323	5853	47	86	75	98	98	42	63	30	2.2	27	22	2.2	4127	4258	4355	4801	4751	5506
4.33_675.54	SM d32:1;	[M+H]+	KYICBZWZQPCUMO-PSALXKTOSA-N	675.545	ESI (+)	4.335	1067	1135	1165	791	1205	1520	114	138	111	117	67	122	23791	24953	27366	27151	25202	25767	42	46	2.69	40	37	45	600	401	561	501	411	683
4.64_689.56	SM d33:1;	[M+H]+	LQINJRUGTUOHGS-YPDYIYJKSA-N	689.559	ESI (+)	4.645	3225	2536	1900	1175	1890	2788	2159	2192	2348	2832	2436	2836	15250	15643	17660	17375	16012	16213	112	244	284	156	217	227	2268	2282	2365	2524	2601	2550
4.97_703.58	SM d34:1;	[M+H]+	RWKUXQNLWDTSLO-GWQJGLRPSA-N	703.577	ESI (+)	4.972	4028	6267	4431	3019	4594	5634	902	736	934	1912	6.7	969	3275350	3194966	3217629	2919542	2440930	1899138	329	491	700	533	545	647	3337	3079	2439	2262	2483	3014
5.66_731.61	SM d36:1;	[M+H]+	LKQLRGMMMAHREN-YJFXYUILSA-N	731.605	ESI (+)	5.661	43.69	43.69	746	437	43.69	43.69	43.69	43.69	43.69	43.69	43.69	43.69	88367	94954	109239	110668	98459	105597	888	670	507	492	1214	1210	43.69	43.69	43.69	43.69	43.69	43.69
6.59_761.65	SM d38:0;	[M+H]+	UGRZESKDAPEULH-ACEXITHZSA-N	761.652	ESI (+)	6.587	7124	10241	6908	3207	5912	10818	264	4.77	4.77	353	4.77	500	4.77	4.77	4.77	4.77	4.77	4.77	84	4.77	48	90	58	105	2531	3039	2981	3337	3154	3529
6.26_759.63	SM d38:1;	[M+H]+	AADLTHQNYQJHQV-SVLGDMRNSA-N	759.635	ESI (+)	6.258	3565	2058	591	3.31	540	822	4452	4755	5713	6284	6761	6203	389	3081	3523	3746	2784	3548	69	41	82	33	3.31	114	4988	3421	5360	5608	4561	5656
6.70_773.66	SM d39:1;	[M+H]+	YXSZOBWVQJIWNE-LUJNSPTCSA-N	773.655	ESI (+)	6.704	9668	16357	10740	4713	4117	13249	17622	16338	21307	21779	25467	22782	11986	11978	13213	12759	11874	11855	90	67	63	94	55	65	16464	15146	15246	15083	15982	15479
6.94_787.67	SM d40:1;	[M+H]+	FJJANLYCZUNFSE-QVMKKYBKSA-N	787.666	ESI (+)	6.942	4273	6794	3973	2075	3291	5706	2731	3326	4907	4972	5509	5511	4287	7080	4922	6890	5978	11589	0.77	0.77	8	40	71	69	3941	4118	4214	4518	4190	4169
7.30_801.68	SM d41:1;	[M+H]+	SXZWBNWTCVLZJN-NMIJJABPSA-N	801.684	ESI (+)	7.303	2245	617	589	810	1053	2316	5673	5611	7055	8257	7603	6654	4679	5508	6885	7909	7152	10360	53	36	72	24	2.37	68	4046	4243	3941	4036	4142	4252
7.72_815.70	SM d42:1;	[M+H]+	QEDPUVGSSDPBMD-XTAIVQBESA-N	815.7	ESI (+)	7.721	2.71	404	147	79	2.71	2.71	636	319	336	805	590	474	53333	57934	62627	61182	55571	53971	37	2.71	31	27	2.71	2.71	268	210	431	222	108	383
7.01_813.68	SM d42:2;	[M+H]+	DACOGJMBYLZYDH-GXJPFUDISA-N	813.684	ESI (+)	7.009	94	2.99	140	113	2.99	2.99	89	162	2.99	180	60	66	132674	142468	163477	160635	141685	142339	2.99	36	35	61	105	41	223	133	2.99	73	224	821
7.04_817.68	SM t41:1;	[M+H]+	YIQLCLWNWHHLSC-NHQGMKOONA-N	817.679	ESI (+)	7.043	19854	26620	17317	10512	15794	24922	31466	35730	51313	55353	63704	57269	549	560	610	578	418	707	28	2.48	97	2.48	25	34	27457	29247	30082	30837	31594	32910
9.15_712.64	TAG 40:0;	[M+NH4]+	XTHFMIVZMLNNFC-RRHRGVEJSA-N	712.642	ESI (+)	9.146	845	626	787	580	498	496	554	516	487	447	503	523	1461	1744	1652	1607	1261	1521	306	350	363	349	271	481	530	421	636	522	622	719
9.68_740.68	TAG 42:0;	[M+NH4]+	DUXYWXYOBMKGIN-UHFFFAOYSA-N	740.679	ESI (+)	9.676	1368	1650	1226	843	990	1078	1247	1071	1073	1235	1441	4001	2678	2179	2859	2952	2682	2928	474	525	420	379	420	445	1288	1380	1181	1428	1342	1302
9.21_743.62	TAG 42:1;	[M+Na]+	PMWOTNASJLOLJE-BNQAGZCGSA-N	743.618	ESI (+)	9.206	280	3.97	441	196	364	359	766	756	1078	1053	291	2082	215	350	652	237	3.97	225	59	42	40	106	49	137	539	245	423	368	494	509
8.73_736.65	TAG 42:2;	[M+NH4]+	IDWYMMYRNPSLDA-NNBKTNTFSA-N	736.645	ESI (+)	8.728	397	1068	1168	857	878	1276	2073	2129	2517	2489	3232	3150	1896	2035	2222	2047	1757	845	71	37	3.7	3.7	46	86	1228	1155	1207	1046	1011	1225
10.16_773.66_10.16_768.71	TAG 44:0;	[M+Na]+_[M+NH4]+	UXWDTZNNQVHGSG-UHFFFAOYSA-N	773.6602_768.7071	ESI (+)	10.161	3664	3122	3761	2878	2852	3466	6125	6213	5593	6482	8143	10454	8786	9140	9860	9542	8854	9491	1484	1352	1306	1567	1613	2485	6353	6749	6080	5703	6267	7493
10.01_768.71	TAG 44:0; TAG 14:0-15:0-15:0;	[M+NH4]+	ROBJWPSKKQDYDD-UHFFFAOYNA-N	768.708	ESI (+)	10.01	1080	576	683	529	252	953	9089	8602	11111	12860	12340	10921	262	349	203	939	1039	412	249	210	835	118	906	1125	3336	3603	3568	3352	3292	3682
9.72_766.69	TAG 44:1;	[M+NH4]+	OUKDNADVOQVFAR-NBTXLFQMSA-N	766.693	ESI (+)	9.724	2931	4129	4388	2814	2817	3965	12600	11782	14407	15905	17379	21210	6135	6111	6119	6183	5562	5208	399	237	184	189	244	362	7467	7164	6863	7327	6914	6757
9.27_769.63_9.27_764.68	TAG 44:2;	[M+Na]+_[M+NH4]+	LJXSUVSRRMQRRA-WHTYERKGSA-N	769.6332_764.6759	ESI (+)	9.272	1899	2882	3936	1027	2518	3743	9495	9394	10953	12558	13610	13799	4992	5282	4953	5801	4592	3803	65.45	113.45	76.45	70.45	58.45	80.45	5364	5296	4594	4930	4223	4784
10.32_782.72	TAG 45:0; TAG 14:0-15:0-16:0;	[M+NH4]+	RIBSYLFDZQICKH-UHFFFAOYNA-N	782.724	ESI (+)	10.317	1764	1745	2167	1642	1637	1883	20287	19290	21757	24966	28013	25900	1370	1256	1613	1652	1544	3299	913	783	582	1015	993	1464	9521	9522	8911	9006	9337	10125
10.16_782.72	TAG 45:0; TAG 15:0-15:0-15:0;	[M+NH4]+	CLJLWABDLPQTHL-UHFFFAOYSA-N	782.721	ESI (+)	10.164	228	112	118	302	149	169	8383	8059	12056	13477	10618	10240	144	235	216	124	152	374	95	87	97	122	107	107	3568	3556	3492	3612	3748	3637
9.89_780.71	TAG 45:1; TAG 14:0-15:0-16:1;	[M+NH4]+	WPZBPGLDPHSUSA-QOCHGBHMNA-N	780.71	ESI (+)	9.889	1147	1636	1927	1241	1433	1810	25556	24502	31133	36505	35179	32439	856	267	170	391	336	676	91	254	91	66	121	217	11219	10615	10820	10674	10671	10227
10.05_780.71	TAG 45:1; TAG 14:0-15:1-16:0;	[M+NH4]+	PYLSHQRKFHSBPH-JZJYNLBNNA-N	780.707	ESI (+)	10.047	8386	10909	10467	6287	6854	9841	19793	18011	18629	21910	26362	23549	275	144	265	80	450	314	318	116	146	266	47	471	15206	15595	15308	14501	14916	14872
9.63_778.69	TAG 45:2; TAG 11:0-17:1-17:1;	[M+NH4]+	NNZUIAGHDSOKEW-SXAUZNKPNA-N	778.692	ESI (+)	9.627	6485	9378	11007	6486	7535	10676	17904	17022	21594	24551	23552	21421	288	565	761	987	629	158	91	112	973	348	651	1271	15432	14873	14099	14192	13600	13395
9.38_776.68	TAG 45:3; TAG 13:1-15:1-17:1;	[M+NH4]+	BRNVPQQLMMGVEN-JQKSUERTNA-N	776.676	ESI (+)	9.379	5857	8017	5528	3156	3630	5002	6647	6367	7839	9335	7052	6774	51	37	52	73	55	45	71	45	83	47	45	39	12785	11955	11350	11867	11781	11193
9.14_776.68	TAG 45:3; TAG 14:1-14:1-17:1;	[M+NH4]+	URGABKRGAVBULK-MIOQMKKENA-N	776.68	ESI (+)	9.143	2512	3482	3092	1654	2072	2937	3459	3133	4562	4928	4852	4631	4.79	94	161	76	66	4.79	4.79	48	64	4.79	4.79	60	4824	4589	4558	4465	4116	4659
10.61_817.67_10.61_801.69_10.61_796.74	TAG 46:0;	[M+K]+_[M+Na]+_[M+NH4]+	JWVXCFSNEOMSHH-UHFFFAOYSA-N	817.6687_801.6941_796.7395	ESI (+)	10.6113	6944	5868	7450	5682	6090	7323	22747	22331	22064.5	24957.5	32280.5	31329	67063	67555	71193	72262	65340	73924	2305	2688	2242	2707	3235	4861	23033	22515	22685	22105	22098	25034
10.48_796.74	TAG 46:0; TAG 14:0-15:0-17:0;	[M+NH4]+	DADOWNLSSLNCDI-UHFFFAOYNA-N	796.741	ESI (+)	10.484	9628	2385	3160	4388	8601	8402	31285	35965	42401	44805	47622	42334	1486	3338	5282	7670	8971	11769	1695	3047	4486	6431	7959	9369	12234	13220	15015	16656	18478	21204
10.21_815.65_10.20_799.68_10.20_794.72	TAG 46:1;	[M+K]+_[M+Na]+_[M+NH4]+	RSDIQTNCDWUNDP-VHXPQNKSSA-N	815.654_799.6788_794.7238	ESI (+)	10.2023	8594	11083	14882	9229	9212	12973	135519	127329	149621	167888	180942	172282	37430	37031	41273	40459	36105	38048	903.46	1175	636	464	867.46	1093	63430	60892	59702	59061	59905	59346
9.78_813.64_9.78_797.66_9.78_792.71	TAG 46:2;	[M+K]+_[M+Na]+_[M+NH4]+	XUEMVUXNOCIHLG-MOFPORNTSA-N	813.6393_797.6644_792.7074	ESI (+)	9.77633	4753	6500	7284	5082	5467	7143	35495	33009	42033	45914	50796	48504	19213	18938	20086	20669	18587	18446	202	428	119	354	281	447	19282	19948	19556	18703	18888	18955
9.95_792.71	TAG 46:2; TAG 14:0-15:1-17:1;	[M+NH4]+	SYRAUVIZOOROCY-AIVGNXKDNA-N	792.709	ESI (+)	9.946	25226	35739	23246	14004	16622	22801	23533	22560	25676	30058	28885	26575	816	809	648	712	810	705	162	100	5.25	76	66	52	24763	23161	23343	22955	22331	22811
9.32_790.69	TAG 46:3; A	[M+NH4]+	YCZHBUHPOJGNKX-YLZDBGKXSA-N	790.693	ESI (+)	9.322	1307	1764	1662	695	1333	1832	3065	2920	3771	4140	4668	4283	2677	2495	3103	2727	2477	2654	50	101	40	64	71	94	2393	2573	2216	2273	2375	2243
9.52_811.62_9.52_795.65_9.52_790.69	TAG 46:3; B	[M+K]+_[M+Na]+_[M+NH4]+	YCZHBUHPOJGNKX-YLZDBGKXSA-N	811.6215_795.6482_790.6928	ESI (+)	9.51667	4227	5932	6365	3811	3562	5036	18531	18777	24251	26954	22831	21421	825	680	846	717	453	540	39.8	171	104	130	137.34	158	24847	25058	24656	23870	24212	24807
10.75_810.76	TAG 47:0; TAG 15:0-16:0-16:0;	[M+NH4]+	BLIGKERFCBUUQF-UHFFFAOYNA-N	810.755	ESI (+)	10.748	3526	3197	3224	2335	2747	3827	74259	73276	84664	93093	102320	92869	2626	2454	2935	2934	2964	3731	1070	1114	1010	1241	1306	1966	36539	35489	34239	35513	35201	37073
10.51_808.74	TAG 47:1; TAG 14:0-16:0-17:1;	[M+NH4]+	PGYNJJCWPCAGLG-GYHWCHFENA-N	808.74	ESI (+)	10.508	16384	22323	26628	15421	16236	22133	145558	138776	147435	166678	212461	190126	512	648	731	388	461	737	556	763	344	437	516	572	95767	93372	91873	93254	91589	92595
10.10_806.73	TAG 47:2; TAG 15:0-15:1-17:1;	[M+NH4]+	QMEJKXDMSCPDTM-XUDKJIQSNA-N	806.725	ESI (+)	10.095	17074	25699	26233	15331	15979	22963	127674	121690	147141	171757	173903	155092	571	416	577	477	428	589	191	532	188	205	401	367	75397	72925	71320	71506	71306	69585
9.66_804.71	TAG 47:3; TAG 14:1-16:1-17:1;	[M+NH4]+	GLMSXNJEVBOWFB-QXTAXTIRNA-N	804.709	ESI (+)	9.656	5928	8064	6375	4007	4384	5516	17995	17483	21040	23994	26342	23829	104	220	251	242	264	271	53	4.68	47	128	67	125	13389	13069	13158	13115	12671	13135
9.87_804.71	TAG 47:3; TAG 15:1-15:1-17:1;	[M+NH4]+	ATEPKEIVGFKOTK-SNHMSGLHNA-N	804.71	ESI (+)	9.865	15645	22035	19177	10527	12066	17431	32622	31287	38847	45564	35880	32646	76	94	70	73	5.58	114	5.58	80	93	56	134	5.58	49088	47741	48010	47107	46965	46925
11.03_845.70_11.03_829.73_11.03_824.78	TAG 48:0;	[M+K]+_[M+Na]+_[M+NH4]+	PVNIQBQSYATKKL-UHFFFAOYSA-N	845.7001_829.728_824.777	ESI (+)	11.0263	9271	8077	13217	9690	11009	12455	44016	41874.4	42269.4	47123.4	64242.4	57696	167064	165254	178617	173956	163704	173761	3627	3865	3667	4235	3966	7017	41843	41797	40273.4	40144	41806	43634
10.64_843.68_10.64_827.71_10.64_822.76	TAG 48:1;	[M+K]+_[M+Na]+_[M+NH4]+	FEKLSEFRUGWUOS-DLOIZKPKSA-N	843.6808_827.7107_822.7567	ESI (+)	10.641	14414	19805	29758	18509	17301	24321	535519	525366	595364	656893	722320	661008	387488	387067	414923	407917	371959	369462	1110	1664	1295	1032.33	1361	1789	218259	219015	214404	210490	211934	207204
10.23_841.67_10.23_825.70_10.23_820.74	TAG 48:2;	[M+K]+_[M+Na]+_[M+NH4]+	RUOVJPPUXXFZPC-YZEIBMOJSA-N	841.6684_825.6952_820.7406	ESI (+)	10.2297	9518	12817	17618	10659	10611	15690	261239	248861	296805	326201	377884	360313	117694	114445	126045	120609	106473	101975	392.67	618	381.67	306.01	407.67	597	107899	106208	102449	102635	102144	103724
10.40_825.69_10.40_820.74	TAG 48:2; TAG 14:0-17:1-17:1;	[M+Na]+_[M+NH4]+	OLBOMGUMQWPDGJ-HKOLQMFGNA-N	825.6949_820.7415	ESI (+)	10.401	70663	95453	79488	46446	48437	68244	427704	425173	463937	525393	547384	498897	2863	2703	3370	2866	2450	1959	169	489	499	158	461	498	268404	262919	263267	261081	264842	264344
9.80_839.65_9.83_823.68_9.86_818.72	TAG 48:3;	[M+K]+_[M+Na]+_[M+NH4]+	SKGWNZXOCSYJQL-BUTYCLJRSA-N	839.6534_823.6807_818.7242	ESI (+)	9.83133	3810	4588	5888	3796	3568	5353	26361	24037	31376	34765	38417	38181	19573	20217	19961	19824	16768	15575	152.83	237	111.83	241	335	130.83	15641	15757	15675	14817	15030	14686
9.99_818.73	TAG 48:3; TAG 15:1-16:1-17:1;	[M+NH4]+	ZRMRBWVANDDZBT-GTTYEUAQNA-N	818.726	ESI (+)	9.995	15773	21664	23489	14189	13407	18582	76668	75990	95177	111605	99995	90847	2595	3046	2709	2498	2101	1962	86	82	142	84	78	123	74162	72229	70515	69979	70730	70337
9.38_821.66_9.38_816.71	TAG 48:4; A	[M+Na]+_[M+NH4]+	GRAMQDDTGXQCSO-ZJPFCMILSA-N	821.6623_816.7078	ESI (+)	9.381	1844	1750	1815	718	1056	1270	2258	2308	2912	3265	3778	3513	8170	8340	8961	8550	8233	8235	211.05	51.05	130.05	67.05	304	101.05	1842	1936	2015	1858	2099	2450
9.58_816.71	TAG 48:4; TAG 15:1-17:1-16:2;	[M+NH4]+	JCIUMWOCTBZFNW-CJFSNAPGNA-N	816.707	ESI (+)	9.58	2722	3989	3920	2327	2312	3309	6140	5891	6967	8176	8410	8086	1063	1096	971	854	1189	1096	46	38	48	31	56	41	5457	5519	5375	5311	5254	5258
8.97_814.69	TAG 48:5;	[M+NH4]+		814.691	ESI (+)	8.971	931	131	565	257	709	928	279	475	233	320	551	285	1574	1443	1587	1507	1123	1592	42	3.24	128	53	61	106	345	113	180	203	404	593
11.16_843.74_11.15_838.79	TAG 49:0;	[M+Na]+_[M+NH4]+	TTWJTJMWHOYBPQ-ANFMRNGASA-N	843.7415_838.7886	ESI (+)	11.1565	1907	1899	2806	1570	1704	2310	60790	60190	75983	85042	90753	79412	3102	2724	3467	3340	3200	3362	510	524	771	539	600	1627	25302	24627	24504	23642	23698	24671
10.78_841.73_10.82_836.77	TAG 49:1;	[M+Na]+_[M+NH4]+	VYYGQDOPVVYUKW-UKFBYESTSA-N	841.7284_836.7717	ESI (+)	10.8025	4877	6695	13218	8069	7177	9623	196485	164139	466667	278918	518232	205259	16241	16304	17103	16366	14788	15226	713	562	377.65	567	639	977	91347	99490	83137	98996	81951	81893
10.93_841.73_10.93_836.77	TAG 49:1; TAG 16:0-16:0-17:1;	[M+Na]+_[M+NH4]+	VYYGQDOPVVYUKW-LVWGJNHUNA-N	841.7277_836.7739	ESI (+)	10.928	31377	40914	72270	39670	41180	57793	490363	487011	497164	547924	646452	582969	1395	846	1067	1139	850	432	366	612	695	290	234	731	326389	320320	318700	321800	329227	339108
10.46_839.71_10.40_834.76	TAG 49:2;	[M+Na]+_[M+NH4]+	QZYSUBAQYSVFNX-PSMULLBHSA-N	839.7125_834.7567	ESI (+)	10.429	4548	6586	8580	5026	5069	6735	88915	82525	102644	114180	125732	113919	12936	12134	13212	12336	10844	10780	275	175	431	266	306	375	54083	52027	51874	50098	49785	49307
10.54_839.71_10.54_834.76	TAG 49:2; TAG 15:0-17:1-17:1;	[M+Na]+_[M+NH4]+	GVAHTORNFUNLJZ-ZPCCLUSSNA-N	839.7116_834.7565	ESI (+)	10.539	44421	60414	85116	49546	47079	66588	1656704	1634813	1931489	2164953	2196431	1974699	3309	3984	4385	3760	3210	3024	511	832	1255	457	490	669	756786	743987	733586	730367	745964	749997
9.97_837.70_10.04_832.74	TAG 49:3;	[M+Na]+_[M+NH4]+	DIGMYZZFQSIQBD-PNLKURBTSA-N	837.6964_832.7399	ESI (+)	10.0045	1805	2102	3567	1972	2355	2902	23362	23063	24626	27339	30108	31113	2843	2750	2812	2902	2511	2801	124.98	169	118	97	61	70	14093	13052	12174	14242	11462	12675
10.13_832.74	TAG 49:3; TAG 14:0-17:1-18:2;	[M+NH4]+	DIGMYZZFQSIQBD-PODSLZKANA-N	832.74	ESI (+)	10.127	11816	16192	18386	10918	10168	14521	106232	100946	116279	130602	160628	146683	1422	1473	1295	1247	1212	1094	41	182	157	48	122	314	59676	57712	55779	56872	56475	55750
10.31_832.74	TAG 49:3; TAG 15:1-17:1-17:1;	[M+NH4]+	QBSXXDHMXWOYPF-URQRYOKINA-N	832.742	ESI (+)	10.311	47478	71424	50323	28010	34551	47082	175661	173390	211496	246827	198375	177568	313	360	266	199	235	255	54	103	113	50	45	196	173025	172607	168613	166738	168950	172686
9.76_830.72	TAG 49:4; TAG 14:1-17:1-18:2;	[M+NH4]+	GXNYVJQFNCMDFX-AMMHHEAINA-N	830.723	ESI (+)	9.76	4721	7284	6712	4047	4343	5924	13567	13110	15971	17349	19932	19321	400	237	255	365	263	239	3.15	32	83	42	3.15	3.15	9393	9732	9331	9139	8766	8584
9.45_828.71	TAG 49:5; TAG 14:1-17:1-18:3;	[M+NH4]+	XNYXFTWCFSCMTF-VZSUNPEPNA-N	828.707	ESI (+)	9.447	4267	5825	6368	3552	3697	5175	8103	8083	9716	10479	11698	10637	196	109	73	63	118	65	114	48	83	71	66	123	4951	4601	4875	5068	4533	5086
11.41_852.80	TAG 50:0; TAG 16:0-16:0-18:0;	[M+NH4]+	DQKMNCLZNGAXNX-UHFFFAOYNA-N	852.803	ESI (+)	11.414	5797	6069	9714	6575	7128	9137	24999	23812	24110	28213	36041	32563	49692	49630	52949	53914	49285	51298	1930	2401	2149	2619	2475	3976	15618	15400	15001	15817	14963	17036
11.04_871.72_11.04_855.75_11.05_850.79	TAG 50:1;	[M+K]+_[M+Na]+_[M+NH4]+	YHMDGPZOSGBQRH-YYSBDVFPSA-N	871.7183_855.7495_850.7933	ESI (+)	11.0453	18429	24001	48909	28742	27471	39700	539041	513780	595184	663627	749138	675017	1203737	1183979	1247796	1218976	1140614	1148133	1863	969	771	524	1142	1493	230549	227384	223232	214237	214797	214755
10.66_869.70_10.66_853.73_10.66_848.77	TAG 50:2;	[M+K]+_[M+Na]+_[M+NH4]+	QEZWFCZNHWUARW-XQCAQTCHSA-N	869.7014_853.7282_848.7732	ESI (+)	10.6587	20304	30047	42406	22068	22347	34922	768494	737683	876230	983033	1136478	1054949	1105117	1087391	1142394	1097616	976334	902137	1275.86	1281	1098	929	934.86	1409	336070	335888	328854	325199	322128	322142
10.83_848.77_10.83_853.73	TAG 50:2; TAG 16:0-16:1-18:1;	[M+NH4]+_[M+Na]+	TWJCMQZMAPGUSG-BIDHIOHYNA-N	848.7735_853.727	ESI (+)	10.83	151756	206439	259386	141611	150511	215633	1882155	1858981	1976783	2220550	2279243	2097261	6708	6970	6862	5690	5670	4246	101	371	1446	484	367	659	1128862	1127980	1141209	1151545	1154537	1178411
10.28_867.68_10.29_851.71_10.29_846.75	TAG 50:3; A	[M+K]+_[M+Na]+_[M+NH4]+	UFHNZOACKFBCOM-YXKNDSBASA-N	867.6844_851.71_846.755	ESI (+)	10.2847	6278	8558.48	14105	9094	7096	10543	165528	153659	191925	208489	229831	222167	316737	310222	342763	325605	292561	292246	389.48	325.48	361.48	287	232	177	107945	105642	104464	102786	101627	101435
10.42_867.69_10.42_851.71_10.42_846.76	TAG 50:3; B	[M+K]+_[M+Na]+_[M+NH4]+	UFHNZOACKFBCOM-YXKNDSBASA-N	867.6871_851.7142_846.758	ESI (+)	10.4223	75261	103134	120898	69598	71976	102153	883718	875069	965089	1121202	1220779	1080179	33774	31870	35065	30895	23497	18555	200	265	673	363.9	262.9	502	414354	411937	412127	408131	406795	414154
9.88_865.67_9.88_849.70_9.88_844.74	TAG 50:4;	[M+K]+_[M+Na]+_[M+NH4]+	PVMBAGXWHHZKFP-JMPJWMFJSA-N	865.6746_849.696_844.7391	ESI (+)	9.87733	2630.37	3185.37	3618.37	2029	2812	2995.37	15102	14398	17607	18475	21074	22027	52945	50240	54335	51854	48176	48598	8.2	84.6	146.37	104.23	90.23	173	11308	11490	11573	11285	10633	10753
10.04_844.74	TAG 50:4; TAG 16:1-17:1-17:2;	[M+NH4]+	SDAXQMNRVOOPLP-CAPKRRBYNA-N	844.741	ESI (+)	10.045	20388	28555	24616	14198	15196	22055	60832	57395	70357	82081	84377	77553	4648	4746	4455	4454	3550	3184	35	46	63	84	38	47	32094	30508	30686	30806	29092	29508
9.50_842.72	TAG 50:5;	[M+NH4]+	AFTBPUXZTDLRSP-UDQIKIEDSA-N	842.723	ESI (+)	9.498	1972	1839	1687	584	2120	1133	2531	3216	3421	3345	4091	4117	4321	4012	4301	4041	4201	3735	87	47	67	71	44	51	1980	1997	1971	2206	2399	2652
11.52_866.82	TAG 51:0; TAG 16:0-17:0-18:0;	[M+NH4]+	YVLSJEQNDDKMQI-UHFFFAOYNA-N	866.819	ESI (+)	11.518	1192	423	730	421	1433	2200	22181	17738	24178	31635	27381	26803	788	827	1133	1466	1596	1591	210	199	198	302	248	405	11363	9659	9700	9478	8971	9244
11.13_869.76_11.17_864.80	TAG 51:1;	[M+Na]+_[M+NH4]+	OZAXLAGNPZMZAD-BOEMPQCLSA-N	869.7612_864.804	ESI (+)	11.148	5512	3798	6771	4911	8148	12620	190522	179998	244669	278621	298262	261881	8615	8558	9697	9651	7912	7980	75.35	322	137	146.35	278	411	88163	85275	84949	82729	80730	78365
11.32_864.81	TAG 51:1; TAG 16:0-18:0-17:1;	[M+NH4]+	DVUCRIHOLAYLAS-RWEWTDSWNA-N	864.805	ESI (+)	11.319	24411	32114	59887	31992	35854	52876	337283	338562	364692	414322	501010	447669	2445	1917	1462	921	720	345	101	56	246	170	95	250	129265	124403	125151	125451	128386	132722
10.85_867.74_10.85_862.79	TAG 51:2;	[M+Na]+_[M+NH4]+	NSNSZGBCOIKUBU-SZOKBDNISA-N	867.7439_862.7889	ESI (+)	10.849	7812	13146	16742	8980	8644	11859	150618	136814	171450	184988	194619	184221	43154	42913	47459	44932	40303	38746	203	424.83	318	224.83	262.83	289.83	91769	91811	89311	88258	104370	102854
10.94_862.79_10.95_867.74	TAG 51:2; TAG 17:0-17:1-17:1;	[M+NH4]+_[M+Na]+	NSNSZGBCOIKUBU-FFPSIVTFNA-N	862.7894_867.7433	ESI (+)	10.944	81457	111185	175715	95873	103695	149906	1982731	1935393	2201098	2451581	2666499	2426078	7453	6131	5847	6228	4430	3268	219	237.11	1336	109	302	669	922451	891721	882188	875972	877969	879984
10.49_881.70	TAG 51:3;	[M+K]+	ISSGPXMQOMAFMJ-DMGKHJLRSA-N	881.701	ESI (+)	10.488	3.13	3.13	3.13	3.13	3.13	3.13	1023	6624	2590	1973	8332	2087	1431	1027	1157	1137	1193	1606	32	31	3.13	3.13	3.13	42	206	439	523	692	362	1464
10.40_865.73_10.41_860.77	TAG 51:3;	[M+Na]+_[M+NH4]+	ISSGPXMQOMAFMJ-DMGKHJLRSA-N	865.7255_860.7709	ESI (+)	10.406	1534	1542	2479	1546	1484	1641.23	58225	57178	71792	78338	92039	84190	4410	3995	4945	4971	4076	3921	5.71	117	32.23	28.23	74	67.23	40466	39863	39385	39049	39099	39514
10.57_860.77	TAG 51:3; TAG 16:0-17:1-18:2;	[M+NH4]+	OOBFBGMNWGVDHN-WFOMNTQJNA-N	860.773	ESI (+)	10.574	20807	30438	38338	21082	21403	32162	512616	491641	531758	582209	718045	650347	9560	9690	10405	9467	8278	7033	75	257	425	57	98	178	247248	241927	237451	239712	240081	244789
10.73_865.73_10.73_860.77	TAG 51:3; TAG 17:1-17:1-17:1;	[M+Na]+_[M+NH4]+	ISSGPXMQOMAFMJ-DMGKHJLRSA-N	865.728_860.7748	ESI (+)	10.7305	1346934	1908162	1412681	683470	1016524	1519864	4731132	4744960	5071243	5533626	5158194	4808790	460.02	1866	1401.02	673.02	446.02	1422.02	115.02	779	2596	519	520	1507	3830542	3782385	3791209	3802797	3811741	3887927
10.16_879.69	TAG 51:4;	[M+K]+	IIRQXNVLAXQEKB-KBEZCZBDSA-N	879.685	ESI (+)	10.161	253	3.36	258	3.36	174	168	2461	2970	2814	3361	3943	3931	109	332	589	98	109	171	3.36	34	64	43	3.36	77	1865	2136	1996	1814	1874	2417
10.04_863.71_10.04_858.76	TAG 51:4;	[M+Na]+_[M+NH4]+	IIRQXNVLAXQEKB-KBEZCZBDSA-N	863.7133_858.7579	ESI (+)	10.039	1114.51	1566	1876	1181	1089	1624	14850	13447	16862	19486	19681	18557	1499	1437	1722	1512	2061	2550	5.96	79	61	87	73	147	11198	11584	11564	11012	10926	10990
9.79_861.70_9.79_856.74	TAG 51:5;	[M+Na]+_[M+NH4]+	DYYKLAQWCNBXRJ-UNZGPCCPSA-N	861.698_856.7419	ESI (+)	9.792	5239	5326	6201	3271	4796	6771	16825	16569	19089	20390	23742	23241	1162	975	1254	1126	1027	1026	104	46.77	86	38.77	50.77	117	11047	11057	10441	10331	10816	10953
9.95_856.74	TAG 51:5; TAG 16:0-17:1-18:4;	[M+NH4]+	OQFBQERSBAVWRE-XJSAXZDNNA-N	856.739	ESI (+)	9.948	7393	10274	13473	7261	8003	11108	34196	31800	41694	45488	48341	44663	287	678	218	193	318	366	3.31	37	87	33	3.31	80	18958	18437	17435	18072	17506	17328
9.66_854.72	TAG 51:6; TAG 14:0-17:1-20:5;	[M+NH4]+	KRTLJAJBIFBQTJ-ABTFNVLONA-N	854.722	ESI (+)	9.662	7919	10085	7202	4304	4647	7399	22565	21306	23357	25986	31876	29006	48	2.75	37	112	35	151	37	28	59	33	2.75	91	12080	11801	11268	11098	11447	12175
11.40_899.75_11.40_883.77_11.42_878.82	TAG 52:1;	[M+K]+_[M+Na]+_[M+NH4]+	NPCZZYKITFKRQZ-RFBIWTDZSA-N	899.7477_883.7742_878.8206	ESI (+)	11.4073	17706.6	24245.6	46268	26957	27915	39114	215140	203506	246499	244039	314706	288733	253800	257891	276530	270623	241244	244994	601	481.11	453	445.11	559	811	103176	102264	98894	96027	95302	93647
11.05_897.74_11.06_881.76_11.05_876.81	TAG 52:2;	[M+K]+_[M+Na]+_[M+NH4]+	TXMWKTABZBAJCW-QLHBUVOUSA-N	897.7355_881.7631_876.8101	ESI (+)	11.0573	23335	25930	37068	22765	19352	28706	563204	536555	617312	696183	822818	749909	3009801	2958342	3089606	3027788	2828875	2842484	1374	702.95	1321	577	931	1793	270054	268425	262457	255415	256700	255812
11.23_881.76_11.22_876.80	TAG 52:2; TAG 16:0-17:1-19:1;	[M+Na]+_[M+NH4]+	WTPFKNGWTMLBLG-HTSSXMBANA-N	881.759_876.8036	ESI (+)	11.2265	207368	280764	282887	156626	191619	274566	1499453	1482580	1587150	1780066	1908323	1731370	19555	18620	18599	16772	13723	11445	11509	14384.5	11894	12826.5	11094	10585	640781	637281	635261	635735	647909	672845
10.70_895.72_10.70_879.74_10.71_874.79	TAG 52:3;	[M+K]+_[M+Na]+_[M+NH4]+	DQXQIWIQYYEGLG-MMWLGPPDSA-N	895.7158_879.7428_874.7886	ESI (+)	10.7033	22156.9	32854.9	35208	20511	20465.9	29226.9	345605	327007	385300	409189	456567	436528	3442301	3367864	3577633	3487344	3170025	3208308	761.91	863	837	676	699	953	294934	291205	284709	282354	281051	285183
10.83_879.75_10.83_874.79	TAG 52:3; TAG 16:1-17:1-19:1;	[M+Na]+_[M+NH4]+	HWZQEBYZOPJIMJ-VLCJSRDHNA-N	879.7451_874.7897	ESI (+)	10.8295	233962	316134	300836	159299	185312	271053	2814508	2729011	2893503	3210471	3532407	3254374	46817	47708	46136	37071	37672	24702	145.54	581	1582	205	405	596	1277987	1272658	1275700	1288815	1290096	1330393
10.33_893.70_10.35_877.73_10.28_872.77	TAG 52:4;	[M+K]+_[M+Na]+_[M+NH4]+	WHSWXEYWNPTUPW-HNJDVRDNSA-N	893.699_877.7278_872.7696	ESI (+)	10.321	4563	5367.61	7400.61	4035.61	4215	5853.61	50463	46042.6	56603	62202	72221	67467	362295	373725	470203	399485	456856	1555312	86.42	367.61	217	233	176	292.61	34724	34547	32472	34113	33412	34800
10.48_877.73_10.48_872.77	TAG 52:4; TAG 17:1-17:1-18:2;	[M+Na]+_[M+NH4]+	NUBMNOGNGCQCEX-VBXMPHEMNA-N	877.7261_872.7721	ESI (+)	10.482	57300	80943	61211	34426	38188	57140	463491	437392	499433	547578	606548	583282	45136	41647	39458	34862	29822	18372	122.11	236	392	84	83	252	281840	276055	271114	271038	267864	271637
9.99_891.69_9.98_875.71_9.99_870.76	TAG 52:5;	[M+K]+_[M+Na]+_[M+NH4]+	CQZAAIKPSLHIBC-KDJOUNIJSA-N	891.6856_875.7115_870.7569	ESI (+)	9.98667	3522	4321.73	6269.73	3191.73	3984.73	5121.73	21167	46680	28751	27797	38370	36205.7	89615	86692	93834	89036	80832	81088	178	151	181	166	173.73	93.73	12507	12657	13019	16601	14811	20532
10.22_870.76	TAG 52:5; TAG 17:1-17:1-18:3;	[M+NH4]+	IJHZWDYIOKCZJD-GVRCYUAENA-N	870.757	ESI (+)	10.217	11986	20254	20837	14653	12090	18476	106279	106272	122033	132926	146256	130541	5654	5313	6121	5411	4662	4404	67	46	135	30	2.95	2.95	45009	44549	44977	43874	43334	45248
9.70_873.69_9.71_868.74	TAG 52:6;	[M+Na]+_[M+NH4]+	SSOSFUDNINFYLJ-KIYGNKBKSA-N	873.6937_868.742	ESI (+)	9.7075	2220	2659	3100	2216	2231	3194	7058	7052	8225	8478	9839	9106	10256	9780	10513	10593	9753	9065	109	76	41.37	62	51.83	80.83	4564	4308	4300	4833	4525	4349
11.80_899.81_11.80_894.85	TAG 53:0;	[M+Na]+ _[M+NH4]+		899.8103_894.8528	ESI (+)	11.801	723	4830	6689	4656	3411	4561	20854	16220	24123	26523	26723	25228	3844	4060	3767	3105	2817	1631	1360	1204	1019	982	769	726	14253	12584	12327	12210	10389	7418
11.55_897.79_11.55_892.83	TAG 53:1;	[M+Na]+_[M+NH4]+	WWJIBIGWKGFVAQ-JNSYTQKUSA-N	897.7888_892.8341	ESI (+)	11.551	3459.33	8008	11594	5801	4451.33	7169	47860	39096	54262	67294	61413	59815	3673	3192	3720	4604	3719	3634	161.33	135.33	182.33	97.33	76.33	202.33	33009	29749	26851	25508	26228	19920
11.24_895.77_11.23_890.81	TAG 53:2;	[M+Na]+_[M+NH4]+	RSINITWKVQRWSZ-RFVLVDBCSA-N	895.772_890.8135	ESI (+)	11.236	9364	432.98	1237.98	466.98	8159	10265	80254	86946	88109	100984	105154	95781	28890	29232	31169	31252	27776	27529	76.65	76.65	76.65	76.65	76.65	76.65	56389	55560	53244	50836	55284	55209
11.32_890.82_11.32_895.77	TAG 53:2; TAG 17:0-18:0-18:2;	[M+NH4]+_[M+Na]+	XFBQQSLGCORCGH-LVBVOWIENA-N	890.8198_895.775	ESI (+)	11.3195	100911	134227	172550	90039	113523	162966	937553	932649	1073199	1200065	1446552	1273708	8785	6608	4594	2944	2139	1474.65	58.65	202	439	48.65	90	198.65	395671	390873	385112	383685	384478	383842
10.92_893.76_10.82_888.80	TAG 53:3;	[M+Na]+_[M+NH4]+	ZNQBEJJYVJSZLM-LEDQTTRKSA-N	893.7594_888.8027	ESI (+)	10.8705	13824	17228	19901	11863	12686	17220	110656	105068	116746	123986	150004	140977	16856	16245	19082	16779	15502	17307	43.96	55.96	289	63.96	150	154.96	79074	79395	80228	80242	79059	78130
11.13_893.76_11.13_888.80	TAG 53:3; TAG 17:1-17:1-19:1;	[M+Na]+_[M+NH4]+	RVLAVFJAALZWRR-CSQXMWNLNA-N	893.7601_888.8046	ESI (+)	11.1285	329838	459617	297890	153460	225400	327346	2212704	2266244	2480473	2833278	2760937	2400947	376.96	349.96	783.96	808.96	256.96	361.96	15.79	147.96	845	161.96	158	451	1100095	1090867	1091335	1103896	1106769	1157894
10.58_907.72_10.53_891.74_10.47_886.78	TAG 53:4;	[M+K]+_[M+Na]+_[M+NH4]+	BMSDHYZLQWTKSQ-LSJAAEOESA-N	907.7164_891.7434_886.7849	ESI (+)	10.5293	3655	4811	4298	2598.88	2724.88	3976.88	29037.9	32126	35031.9	35148.9	42463.9	41352.9	12039	11461.7	11318.7	11229.7	11722.7	12509.7	100.73	58.61	76.88	104.73	46.32	114.73	24803	21198	21251	19609.9	56775	58166
10.24_905.70_10.14_889.73_10.14_884.77	TAG 53:5;	[M+K]+_[M+Na]+_[M+NH4]+	QHYAATSKYBYSLG-BXDFBOBBSA-N	905.7009_889.7296_884.7714	ESI (+)	10.1753	5648	6989.16	8521.16	2936	3480	6369.16	46998	47857	56839	60633	70579	65136	5283.16	5285.16	5709.16	5638.16	4997.16	4828.16	163	146	146	148.91	62.16	198	26371	26643	25762	24864	25940	26716
10.13_882.76	TAG 53:6; TAG 16:0-17:1-20:5;	[M+NH4]+	JLRUPKSBDFHDKL-UXXMUASRNA-N	882.758	ESI (+)	10.135	16644	21971	24796	13593	16758	25298	114330	114005	131987	145429	168781	154407	216	165	305	108	153	117	3.22	34	81	63	57	32	59997	60002	58504	57970	58717	60897
9.95_882.76	TAG 53:6; TAG 17:1-18:2-18:3;	[M+NH4]+	CRAKBYXKEQVYKV-OMMQKVGWNA-N	882.756	ESI (+)	9.948	9640	13433	14594	8198	9055	13063	51550	49644	60311	66595	76682	70036	1113	1076	1009	1159	894	702	33	3.28	59	57	78	47	24560	23861	23501	23059	22984	23148
11.88_913.82_11.87_908.86	TAG 54:0;	[M+Na]+_[M+NH4]+	KKBWDSMULWDHME-UHFFFAOYSA-N	913.8199_908.8646	ESI (+)	11.8735	7015	74196	12716	14376	15250	24916	18688	16839	15566	17063	41375	18314	14293	16714	11624	12569	13045	4864	5211	5799	7577	11662	14324	7657	23874	21852	19809	17699	17861	6897
11.74_911.80_11.76_906.85	TAG 54:1;	[M+Na]+_[M+NH4]+	YFFIQXNTTVSKJC-NZEOUKRFSA-N	911.8046_906.849	ESI (+)	11.75	11317	28341	40270	20650	13816	20419	112757	66267	125912	147746	145278	139910	67059	64596	61979	52439	38805	33433	758	907	469	283	181.5	415	65339	60177	53008	43037	34307	21242
8.80_888.71	TAG 54:10; TAG 14:0-20:5-20:5;	[M+NH4]+	KLJOMGXQBVTJME-PPBXLPDVNA-N	888.709	ESI (+)	8.802	2178	1024	1609	118	1478	2273	713	4475	963	978	1319	2334	3.03	3.03	3.03	3.03	3.03	3.03	3.03	3.03	48	30	30	56	512	2645	2707	2774	2893	2881
11.41_925.76_11.41_909.79_11.45_904.83	TAG 54:2;	[M+K]+_[M+Na]+_[M+NH4]+	WUUWGORPQFKFQN-XDVOZUNOSA-N	925.7621_909.7902_904.8326	ESI (+)	11.426	14853	15780	17866.5	11011	12767	19145	116761	79558	131720	146598	180554	162994	212090	216386	233804	228453	202266	89904	255.54	386	214	260.54	235	500	65544	63580	62941	62217	60994	60616
11.56_904.83	TAG 54:2; TAG 18:0-17:1-19:1;	[M+NH4]+	LHHQXWUOVFWSOM-NSGHHYQVNA-N	904.834	ESI (+)	11.559	41622	16708	15869	32062	32666	46459	352799	232025	344708	471970	402074	381929	14654	12365	7658	2936	1417	975	119	103	352	83	48	157	143001	126403	106746	93875	91643	91184
11.81_890.85	TAG 54:2e; TAG 18:0e-18:1-18:1;	[M+NH4]+	KWTSBMYCAXGVHX-UHVUIYCVNA-N	890.854	ESI (+)	11.812	1762	9054	5023	2870	1603	2231	13188	9463	13764	16260	17992	17223	995	1009	947	266	779	289	56	62	105	64	5.64	92	11099	10332	9579	8486	4870	3373
11.09_923.75_11.09_907.78_11.10_902.82	TAG 54:3;	[M+K]+_[M+Na]+_[M+NH4]+	PHYFQTYBJUILEZ-IUPFWZBJSA-N	923.7462_907.7787_902.8211	ESI (+)	11.095	14771	22898	19177	10389.6	10739	16145.6	137745	130640	156713	173805	202039	180407	1044599	1031222	1076416	1042282	953735	925630	960	1112	993	690	1017	1035	95964	93608	93355	90958	93759	90077
11.22_902.82_11.21_907.78	TAG 54:3; TAG 17:1-18:1-19:1;	[M+NH4]+_[M+Na]+	XMKPSJMQOZXTFU-GKAMGFBHNA-N	902.8195_907.7756	ESI (+)	11.216	137691	190247	145715	76884	99426	149192	1432132	1418563	1519399	1709800	1972816	1765582	24418	20568	17656	14962	10679	6935	279	243	1005	121	315	399	585484	579178	581427	580246	586887	603882
10.68_921.73	TAG 54:4;	[M+K]+	BRLGHZXETDWABO-NOFIOOQLSA-N	921.735	ESI (+)	10.676	5.16	5.16	5.16	5.16	5.16	5.16	5.16	646	5.16	525	528	5.16	3408	3057	3864	2720	4089	6016	5.16	52	5.16	5.16	59	61	1113	463	1172	706	989	546
10.75_905.76_10.75_900.80	TAG 54:4;	[M+Na]+_[M+NH4]+	BRLGHZXETDWABO-NOFIOOQLSA-N	905.7596_900.8034	ESI (+)	10.752	7425	10399.1	8916.15	5592	5584.15	8940	75441	96456	94369	85880	164811	118633	1015757	991057	1088841	1051484	950063	448083	484	406.15	436	311	593	483	62738	62562	60188	60685	61565	62135
10.89_900.81	TAG 54:4; TAG 17:1-19:1-18:2;	[M+NH4]+	QJELFDUXRDPSGE-GARNRMCRNA-N	900.805	ESI (+)	10.89	29714	41103	28711	15740	18616	28144	298883	293238	329557	367583	453274	398941	18248	16131	18712	16281	14546	11806	104	52	120	129	121	217	167212	164083	162390	163028	165906	163512
10.35_919.72_10.36_903.74_10.34_898.79	TAG 54:5; A	[M+K]+_[M+Na]+_[M+NH4]+	OEJXMJPFOHYSIU-GRLFFVHSSA-N	919.7154_903.7427_898.7892	ESI (+)	10.3513	4659.91	2509.85	5239.85	3199.85	2959.91	4785.85	31253.9	29819	32466.9	37144.9	44005.9	40560.9	700192	689437	755723	733973	673025	692324	237	324.91	319.91	310.91	313	703	25168.9	24937.9	26108	24084.9	23728.9	24951.9
10.57_919.72_10.57_903.74_10.57_898.79	TAG 54:5; B	[M+K]+_[M+Na]+_[M+NH4]+	OEJXMJPFOHYSIU-GRLFFVHSSA-N	919.7177_903.7424_898.7862	ESI (+)	10.571	32899	43404.2	33086	18451.2	24409	35773	267084	262136	277812	306067	341817	302933	243543	231920	261594	248890	228959	237323	84.15	89.32	134	142	105.32	211	82804	81863	80366.1	81415.1	82332.1	85502.1
9.98_917.70_9.98_901.73_9.98_896.77	TAG 54:6; A	[M+K]+_[M+Na]+_[M+NH4]+	HBOQXIRUPVQLKX-BBWANDEASA-N	917.7039_901.7263_896.7711	ESI (+)	9.982	16340	5628.58	9970	5748	14461.6	23299	21326	58514	26105	26196	83458	40252	112141	107849	118396	112600	101297	103159	141.58	337.58	336.58	227.32	142.32	267	30696	30630	30672	30861	31054	30289
10.21_901.73_10.21_896.77	TAG 54:6; C	[M+Na]+_[M+NH4]+	HBOQXIRUPVQLKX-BBWANDEASA-N	901.7268_896.7703	ESI (+)	10.2075	36110	50311	46254	25431	30136	46152	192653	184760	219727	237409	280991	258361	106139	100149	116578	111438	101712	101930	153	87	173.26	44.26	88	199	75534	75855	73515	72741	71986	71830
9.60_915.68_9.61_899.71_9.61_894.75	TAG 54:7; A	[M+K]+ _[M+Na]+ _[M+NH4]+		915.6829_899.7115_894.7529	ESI (+)	9.60667	991	1800.26	1847.26	915.26	1364	1170.26	3044	3087	3486	3606	3725	4007	18594	18411	19675	18729	17812	17383	214	167	160	31.71	73.26	93.83	3563	3849	3595	4044	3953	3385
9.81_894.75	TAG 54:7; B	[M+NH4]+		894.755	ESI (+)	9.811	3350	3947	5840	3533	3646	4878	17201	18094	20324	21238	26472	25264	5715	5524	6219	5659	8105	8510	4.85	74	116	49	4.85	4.85	7425	7604	8058	8189	14223	14187
9.87_894.75	TAG 54:7; TAG 16:1-18:1-20:5;	[M+NH4]+	ZYPFLBVTLWULRJ-RPZQVDDZNA-N	894.754	ESI (+)	9.865	3807	5479	6197	3533	3646	5114	27191	25397	32622	34889	35014	34015	9564	9281	10222	9253	8105	8510	10.18	102	10.18	10.18	10.18	10.18	14446	14506	13817	14396	14223	14187
10.02_894.76	TAG 54:7; TAG 17:1-17:1-20:5;	[M+NH4]+	QETKLZAZECLMON-HFUDSGFYNA-N	894.755	ESI (+)	10.023	54165	71530	56860	30451	43302	65562	158390	155680	172356	191789	217160	197471	854	876	1135	1038	428	364	44	4.04	55	4.04	40	4.04	74388	71439	71556	70211	70911	74549
11.63_918.85_11.67_923.81	TAG 55:2;	[M+NH4]+ _[M+Na]+		918.8509_923.8064	ESI (+)	11.6525	24902	63767	56266	28359	25368	35754	233644	135635	237850	303373	298398	280436	2044	2281	1694	1385.38	523.38	946.38	110.21	4.59	149	153	64	94.38	108062	99877	86759	69257	62988	51024
11.28_916.84	TAG 55:3;	[M+NH4]+		916.836	ESI (+)	11.281	12666	17156	15295	8221	9799	13907	173445	177139	193881	95323	320299	269607	2583	2249	2506	2321	1101	1971	37	97	77	50	57	57	66041	64853	64187	64992	65316	66985
11.48_921.79_11.48_916.83	TAG 55:3; TAG 17:1-19:1-19:1;	[M+Na]+_[M+NH4]+	YESTXLAUCKSJHL-KSESCRLANA-N	921.7902_916.8349	ESI (+)	11.477	48609	56996	31634	19937	29779	40962	268986	262439	296207	144969	331404	291761	299.09	87.09	133.09	90.09	139.09	85.09	54.31	8.4	154.09	77.09	91	49.09	59761	129047	124302	124880	127748	135624
10.98_914.82	TAG 55:4; TAG 18:1-19:1-18:2;	[M+NH4]+	DKILRNXFVWECGW-JNKAIAEUNA-N	914.819	ESI (+)	10.978	7374	10310	7653	4306	5038	7001	90639	90916	103765	115058	159369	137563	1374	2396	981	1491	2250	1810	3.21	3.21	33	32	66	67	57134	56129	56344	56924	57107	60557
10.67_912.80	TAG 55:5; TAG 17:1-18:1-20:3;	[M+NH4]+	GJXXRANBUZEYEC-UONONGMSNA-N	912.802	ESI (+)	10.666	9118	13490	11767	6314	7389	10641	155801	140830	160056	182939	221142	196124	3289	1494	2686	2792	2492	2002	40	75	44	3.24	32	90	49106	47724	46033	45488	43696	43974
10.58_915.75	TAG 55:6; TAG 18:0-17:1-20:5;	[M+Na]+	ZUJZUGZQXZFHII-OSMIJXIGNA-N	915.746	ESI (+)	10.58	10095	12601	12254	7407	9642	14140	31149	30364	34049	34300	38902	37004	2.57	2.57	2.57	2.57	2.57	2.57	31	104	2.57	35	26	49	17012	17325	16576	17315	17278	17010
10.14_908.77	TAG 55:7; TAG 17:1-18:1-20:5;	[M+NH4]+	FZCWUXLZPBVHLD-RWCIUOHKNA-N	908.773	ESI (+)	10.137	28541	37912	33171	18388	21183	33104	135738	130204	153392	170128	216469	195713	272	364	479	191	520	231	37	54	40	3.47	35	3.47	54081	52981	51874	52490	52769	55271
11.96_936.90	TAG 56:0;	[M+NH4]+		936.897	ESI (+)	11.964	157	2772	2433	2076	1844	135	3042	1235	2985	3459	3299	3511	3262	3078	2957	601	1033	198	959	922	867	100	201	89	2759	2636	2386	2396	1133	377
11.87_955.81_11.92_939.84_11.87_934.88	TAG 56:1;	[M+K]+_[M+Na]+_[M+NH4]+	OCYFAHIHWCVZKS-FHSLLVMSSA-N	955.8092_939.8388_934.8822	ESI (+)	11.8877	5614	24565	24311	12084	8353	16667	43543	36424	49603	60878	52024	55478	15735	15292	14641	11945	10266.3	549	911.3	776.3	635.3	396.3	206.3	343	38025	34652	28603	33307	25332	19772
12.01_934.88	TAG 56:1; TAG 18:0-20:0-18:1;	[M+NH4]+	OCYFAHIHWCVZKS-QVTSOHHYNA-N	934.88	ESI (+)	12.011	4098	93	139	205	108	159	241	196	236	349	279	139	15	184	88	62	245	5629	192	58	146	83	86	330	190	144	101	283	500	9577
9.15_921.69_9.17_916.74	TAG 56:10;	[M+Na]+ _[M+NH4]+		921.6949_916.7402	ESI (+)	9.164	3807	5131	4528	2018	2997	5051	6211	5704	7247	7794	9149	8587	6.81	6.81	6.81	6.81	6.81	6.81	89	93	51.05	93.05	53.05	53.05	3797	4049	3714	3459	3998	2128
9.34_916.74	TAG 56:10; TAG 16:0-20:5-20:5;	[M+NH4]+	QTNYDZPWHCXVJM-HTSKAZOUNA-N	916.74	ESI (+)	9.341	4430	1655	5173	753	3269	5987	16131	15515	19499	3590	24441	23264	3.55	3.55	3.55	3.55	3.55	3.55	50	36	66	61	62	3.55	9453	9621	9330	9128	9436	9956
11.76_937.82_11.75_932.86	TAG 56:2;	[M+Na]+_[M+NH4]+	PDEQUPGHMOMBFC-FYEHETCMSA-N	937.8249_932.8619	ESI (+)	11.753	12553	20371	14895	5406	5009	6978	40532	18777	40306	50546	43627	45828	20385	19787	17635	14968	10670	9028	202	467	183	216	223	144.47	40781	30915	24068	17993	14720	20180
11.87_932.87_11.86_937.82	TAG 56:2; TAG 20:0-17:1-19:1;	[M+NH4]+_[M+Na]+	ICVXCPGCBCIFJM-ZSVZRPGVNA-N	932.8685_937.8245	ESI (+)	11.863	74947	127087	81931	42754	61256	86379	183645	161580	212380	247146	225957	207466	945.63	2048	1765	2452	1857	2234	224	362.63	336	245	205.63	205	146153	142985	136678	133865	131341	107349
11.45_935.81_11.46_930.85	TAG 56:3;	[M+Na]+_[M+NH4]+	QXMHHXQBBKDSSL-BAQZNRHJSA-N	935.8096_930.8485	ESI (+)	11.455	3173	4957	2269	2146	1848	3274	6552.84	11183	9339.84	8088.84	12926.8	11166.8	12798.8	12391	16194	15802	13719	13993	166	32.84	107	125	130	229	8806	8558.84	7951	10881	10657	10227
11.54_930.85	TAG 56:3; TAG 18:1-19:1-19:1;	[M+NH4]+	XVTBGAHSMYDJGY-PGEUSFDPNA-N	930.848	ESI (+)	11.544	16239	33169	20398	9668	10715	15061	37820	119704	170377	45115	218732	201809	5901	5218	3731	1988	876	440	91	101	146	47	69	94	18021	8555	54800	48738	47474	45656
11.05_949.75_11.09_928.83	TAG 56:4;	[M+K]+_[M+NH4]+	YONCDTJKIZDSKQ-IYASBODOSA-N	949.7548_928.8336	ESI (+)	11.07	3178	2183	1732	927	1636	2439	13124	13444	14233	15508	20118	18777	30216	30085	31342	31045.2	26957.2	27974	149	4.05	32.18	56	95	68.18	7692	6716	7415	7074	7266	13050
11.25_928.83	TAG 56:4; TAG 18:0-18:1-20:3;	[M+NH4]+	JRSOEXBBHGXQPU-YMXOETFQNA-N	928.835	ESI (+)	11.253	8706	12082	7812	4226	5413	7889	59190	59993	64589	73139	90987	79763	3220	2833	2494	2086	1935	1324	42	4.15	92	4.15	55	53	30430	30490	29927	30508	31006	31610
10.72_926.81	TAG 56:5; A	[M+NH4]+	UHEJWASONFIROS-YPSHDQQVSA-N	926.814	ESI (+)	10.725	3779	3847	1896	1750	803	1066	27880	27360	29677	41351	42153	36746	14860	14150	15727	15204	13785	13848	86	54	56	54	52	106	16198	16689	15463	15239	14873	14714
10.86_926.82	TAG 56:5; B	[M+NH4]+	UHEJWASONFIROS-YPSHDQQVSA-N	926.82	ESI (+)	10.855	4377	5836	5540	3136	3659	5335	38666	38307	43534	48026	59632	51799	18083	17869	19691	18875	16839	16825	34	29	64	106	74	62	12925	12599	12913	12786	13075	13735
10.96_926.82	TAG 56:5; C	[M+NH4]+	UHEJWASONFIROS-YPSHDQQVSA-N	926.82	ESI (+)	10.964	9673	12987	8291	4676	6461	9889	107216	109886	116585	128547	145979	127123	48189	45392	49889	46324	41550	38402	54	67	99	52	51	61	28462	29226	29175	29881	30338	30859
10.59_924.80	TAG 56:6;	[M+NH4]+	ZTNDRFCABXFVMY-WJTCTALZSA-N	924.801	ESI (+)	10.585	2340	3875	2855	1997	1942	2722	13280	11308	15271	16715	17948	17310	103676	98423	109039	101344	94063	92800	92	0.97	60	0.97	10	111	5462	5575	4417	2165	3781	5011
10.68_924.80	TAG 56:6; TAG 17:1-19:1-20:4;	[M+NH4]+	NVZSFMWAPMOXNL-CKVVDUTENA-N	924.803	ESI (+)	10.684	21475	30858	23288	12057	15223	23171	132586	119457	147240	166290	198432	178993	48057	43976	43654	39171	30970	23490	34	1.58	1.58	16	16	38	47529	46385	43673	42125	39928	36742
10.23_943.71_10.24_927.74_10.24_922.79	TAG 56:7; A	[M+K]+_[M+Na]+_[M+NH4]+	DODZUDCYRVWEOJ-GKZBLMSTSA-N	943.7105_927.7431_922.7875	ESI (+)	10.235	8192.35	9730.35	9952.35	4480.35	5110	7573.35	37136	34964	42689	47642	61240	54033	68078	65408	75142	68863	64279	64766	643	85.89	485	240	387.38	469	14476	15642	13807	13416	14382	14282
10.47_927.75	TAG 56:7; B	[M+Na]+	DODZUDCYRVWEOJ-GKZBLMSTSA-N	927.747	ESI (+)	10.468	9561	11787	7829	4744	7227	10002	19104	19381	20542	22295	26461	24329	3777	2.79	2.79	2.79	2.79	2.79	2.79	2.79	56	28	60	2.79	10454	10906	10811	10673	10733	10647
10.38_922.79	TAG 56:7; B	[M+NH4]+	DODZUDCYRVWEOJ-GKZBLMSTSA-N	922.787	ESI (+)	10.385	2685	8826	6306	3692	1592	3719	14897	9478	33783	38950	17576	14581	30950	28878	34363	31180	28983	27367	348	1.43	61	96	30	14	6848	6756	5706	4533	4203	2334
9.87_941.70_9.87_925.73_9.87_920.77	TAG 56:8; A	[M+K]+_[M+Na]+_[M+NH4]+	UBGUHMDKBGQUND-VPFWBQFRSA-N	941.6987_925.7255_920.7726	ESI (+)	9.869	5539	6127	5945	1151	3093	4708	27895	27235	34703	37123	42129	39221	15599	14950	17191	16024	14649	14868	190	124.93	56.99	139	67.92	65.99	16532	16488	16075	15644	16206	15786
9.98_920.77	TAG 56:8; B	[M+NH4]+	UBGUHMDKBGQUND-VPFWBQFRSA-N	920.772	ESI (+)	9.976	4440	5663	4670	2653	3372	5389	11878	11134	13764	15368	16040	14277	13174	12239	13957	12968	12498	13235	49	33	36	32	39	65	5022	5126	4833	4895	4965	4899
9.49_923.71_9.49_918.75	TAG 56:9;	[M+Na]+_[M+NH4]+	HTODETRMAVZETG-GOCHBVGNSA-N	923.7114_918.7537	ESI (+)	9.492	2062	1251.04	2016	259.04	1767	5988	9267	8010	11204	11683	13120	12740	8.1	601.06	8.1	590.06	897.06	8.1	96	206.04	130	85	105.04	64.06	7001	7401	6750	6832	7306	6839
11.94_953.85_11.94_948.90	TAG 57:1;	[M+Na]+_[M+NH4]+	QLQFCWUGYPUXFE-MKFPQRGTSA-N	953.8495_948.8966	ESI (+)	11.942	2631	15608	12285	6164	1260	1629	16768	3628	18759	21764	21053	20567	1836	1314	1392	1485	442	354	384	594	194	234.73	127	135	15128	13848	13512	11065	3805	4720
12.13_948.90	TAG 57:1; TAG 18:0-22:0-17:1;	[M+NH4]+	GGINZASHAMQHAX-PNHLSOANNA-N	948.897	ESI (+)	12.135	5277	39	50	66	68	128	103	121	93	99	70	105	3.06	51	98	57	3.06	818	40	3.06	44	98	33	74	59	93	92	159	3.06	6797
9.22_933.69_9.26_928.74	TAG 57:11; TAG 17:1-20:5-20:5;	[M+Na]+_[M+NH4]+	BCFLIYMMYUNOMR-JPFARBKLNA-N	933.6944_928.7397	ESI (+)	9.2395	32426	30270	23932	17195	23807	40441	46170	56516	70363	59912	84983	81433	133	65.04	75.04	125.04	65.55	159	68.55	86	226	69	39.04	96.55	28232	35076	34027	35985	35058	16266
11.91_951.84_11.93_946.88	TAG 57:2;	[M+Na]+_[M+NH4]+	OQPANTOJGGHRCB-OEIGHXOUSA-N	951.84_946.8849	ESI (+)	11.9205	13021	1057.35	854	466.35	25581	37433	593.35	14628	1264.35	493	2761	2140	216.35	206.35	167.35	286	215.35	583.35	51.53	156	107.35	151.35	126	178	655	567	3038	7265	47924	17683
11.78_944.87	TAG 57:3; TAG 17:1-19:1-21:1;	[M+NH4]+	RFMCTYVWPSJOOX-PKYCGMJXNA-N	944.867	ESI (+)	11.782	5597	12097	6433	3455	3750	5809	39874	32966	46682	53581	48566	45001	237	337	439	367	286	127	37	56	35	44	3.46	46	23289	22286	20763	19376	15980	14356
11.70_944.87	TAG 57:3; TAG 18:1-19:1-20:1;	[M+NH4]+	RJWKKTHHBJMOIE-AEJKSTJDNA-N	944.865	ESI (+)	11.7	3477	8616	4993	2858	2254	2909	16776	8463	18400	21334	19808	19268	608	461	335	337	83	163	3.48	40	35	37	39	47	15666	14437	12329	9943	8359	7464
11.04_940.84	TAG 57:5; TAG 18:1-19:1-20:3;	[M+NH4]+	LYZLFFRSDZBKLH-KWJJGDFPNA-N	940.839	ESI (+)	11.045	1172	2536	2232	963	1166	2600	31758	30612	30466	39188	49152	42687	2.86	2.86	299	2.86	2.86	2.86	68	53	65	29	2.86	76	9609	9175	9089	8865	9255	8992
10.98_938.82	TAG 57:6; TAG 18:0-19:1-20:5;	[M+NH4]+	QNALPIBUIXHGKY-VCJXWZBCNA-N	938.818	ESI (+)	10.984	9291	12097	8699	5232	6934	10669	44686	47873	53944	59739	74336	64597	213	1.08	179	11	55	1.08	1.08	38	63	27	59	52	17423	17132	17306	17352	17731	19237
10.74_938.82	TAG 57:6; TAG 19:1-18:2-20:3;	[M+NH4]+	CSPFSTLKLRXPOC-BMEIGENBNA-N	938.817	ESI (+)	10.744	6652	8585	5516	2827	3954	6317	36849	35916	39666	42672	52709	49014	307	2.88	666	742	367	369	57	2.88	29	40	43	2.88	13544	13710	13551	14242	14650	14369
10.21_934.79	TAG 57:8; TAG 19:1-18:2-20:5;	[M+NH4]+	LLGWAYGQTVNZHT-ZNYJYMIINA-N	934.789	ESI (+)	10.21	5616	7999	4504	2540	3157	4781	20196	20451	23795	25922	31100	27752	272	160	523	381	135	126	29	35	2.95	37	32	30	11819	11175	11158	10625	11180	11203
9.84_932.77	TAG 57:9; TAG 17:1-20:4-20:4;	[M+NH4]+	WVLRVHBTSRIPJN-YYHSSHPCNA-N	932.771	ESI (+)	9.838	10949	13483	8712	3851	6970	12060	24978	22944	26902	29614	31676	29967	80	85	124	71	165	186	48	84	91	103	70	47	10558	10038	10021	9931	9972	10424
11.97_967.87_12.02_962.91	TAG 58:1;	[M+Na]+_[M+NH4]+	OWZMHFAFGQCCNI-FBXRAONGSA-N	967.8682_962.9114	ESI (+)	11.9925	957	2528	2019	5113	4808	6625	2514	7883	14621	3636	15641	20671	1420	1416	8311	6345	5327	217	442.1	540	306	302.1	242.1	79.1	2035	1965	10271	8889	7298	1230.1
12.17_962.91	TAG 58:1; TAG 18:0-22:0-18:1;	[M+NH4]+	HFCKOGWQFCDRLW-KGGMANCPNA-N	962.911	ESI (+)	12.17	4975	62	78	29	53	79	46	2.83	40	172	34	46	50	37	35	40	124	4380	2.83	41	56	94	34	200	35	40	36	58	84	5195
9.61_949.73	TAG 58:10;	[M+Na]+	GXWBCAVCOMAOHT-VMCJOIRWSA-N	949.727	ESI (+)	9.614	1544	1769	1203	785	851	1514	3405	3247	4090	4075	5042	4439	217	2.96	2.96	103	2.96	2.96	34	2.96	31	38	2.96	30	1461	1497	1064	1524	1499	279
9.71_944.77	TAG 58:10;	[M+NH4]+	GXWBCAVCOMAOHT-VMCJOIRWSA-N	944.772	ESI (+)	9.708	2.97	146	2.97	2.97	210	2.97	2512	2244	2967	3144	3493	3581	3545	3573	3919	2951	3590	3287	30	2.97	2.97	37	31	40	1663	1325	1499	1261	1599	1268
9.87_944.77	TAG 58:10; TAG 18:0-20:5-20:5;	[M+NH4]+	CBEMNRMZPXVRFJ-RQWQCXEENA-N	944.771	ESI (+)	9.869	9731	11723	8319	4391	6666	12199	16747	15739	19663	21150	23549	20960	752	586	854	830	441	856	32	3.16	3.16	47	44	32	7663	7562	7308	7614	7985	8089
11.91_965.85_11.91_960.90	TAG 58:2;	[M+Na]+_[M+NH4]+	NFQQJRGJJVQGAV-MEADVOAOSA-N	965.8541_960.8973	ESI (+)	11.9135	495	29982	15408	8796	3172	5456	25523	8477	30989	37005	31390	31741	16079	15218	14429	13283	9702	10.79	59.18	126.61	56.18	75.61	10.79	116	27709	25644	23982	20794	3057	212.61
11.77_963.84_11.81_958.88	TAG 58:3;	[M+Na]+_[M+NH4]+	RFMSTHTUAZETPD-JJPHLYBUSA-N	963.84_958.8829	ESI (+)	11.7925	3746	9334	6126	3657	3203	5071	20601	14419	22943	25156	25732	24872	12687	12675	11135	10525	7851	5864	197.42	308	45.92	73	107	107.92	18030	16699	13942	12412	10556	6984
10.83_952.83	TAG 58:6;	[M+NH4]+	GSNFRUMSEHHPSY-LCXCSEBNSA-N	952.835	ESI (+)	10.826	1802	1146	1073	377	532	1139	5224	2281	2420	6100	7459	5401	996	1232	1181	1309	950	1503	2.99	2.99	2.99	30	50	2.99	1560	1983	1392	1911	2281	2597
10.87_950.82	TAG 58:7; TAG 19:1-19:1-20:5;	[M+NH4]+	QEXLLRWBIZSCKA-WWUHOIHNNA-N	950.821	ESI (+)	10.873	4863	6161	3738	1071	2798	3733	14710	15724	16804	18761	25199	21704	1254	230	1316	886	128	358	5.83	5.83	89	58	75	5.83	6824	6612	6457	6806	7093	7461
10.41_948.80	TAG 58:8;	[M+NH4]+	KWIGMCRWEINBIR-HUPVKWKYSA-N	948.805	ESI (+)	10.412	773	3246	4.93	4.93	4.93	812	12092	12602	14327	15874	17515	15007	7907	7257	8046	7489	7245	7225	68	4.93	4.93	4.93	49	4.93	3731	4011	3936	3952	3957	3954
10.08_951.75_9.96_946.79	TAG 58:9;	[M+Na]+_[M+NH4]+	RVXFSLZMZOFGEQ-SWIIBWKZSA-N	951.747_946.7855	ESI (+)	10.0225	864.63	1403.63	963.63	139.63	961.63	1642.63	10717	10720	12751	13123	16295	14607	3196	3219	3252	2624	3160	2509	61.88	62.88	82	55	5.51	5.51	3925	3883	3823	3653	3355	4295
9.75_956.77	TAG 59:11; TAG 19:1-20:5-20:5;	[M+NH4]+	IWFFQPPEGOGGSN-OXTMLILMNA-N	956.77	ESI (+)	9.752	9314	11729	6426	3814	5449	9066	12116	11607	14365	15708	18737	17816	84	67	50	2.84	2.84	46	53	2.84	28	40	41	29	6637	6863	6972	6819	6879	7130
11.94_979.87_11.95_974.91	TAG 59:2;	[M+Na]+_[M+NH4]+	ONQVFVNCAXIZPA-OEIGHXOUSA-N	979.8686_974.9114	ESI (+)	11.946	352.53	16032	9644	5016	4961.53	6714	14369	8809.53	16731	19547	18437	18093	1404	1330	1402	1265	1236	230.53	85.53	81.52	129	87.53	49.53	34.53	13357	12526	12131	10961	8189.53	1006
12.13_974.91	TAG 59:2; TAG 22:0-18:1-19:1;	[M+NH4]+	LMYZWHMRWJKCRG-DVOOXPFVNA-N	974.912	ESI (+)	12.134	5756	82	58	34	48	45	71	75	10	135	0.98	86	30	34	95	100	88	622	0.98	30	0.98	38	31	29	68	54	103	133	133	6237
11.85_972.90	TAG 59:3;	[M+NH4]+	GFWCWSZOZVIVJH-ZIURWEIWSA-N	972.903	ESI (+)	11.848	569	9207	4649	2544	1808	2571	9439	5084	11158	13222	12000	12688	2036	1259	1852	1682	1399	538	69	39	28	43	87	36	11556	11038	9871	6757	1321	1216
12.04_995.90_12.08_990.94	TAG 60:1;	[M+Na]+ _[M+NH4]+		995.9014_990.9427	ESI (+)	12.057	252	651	311	1234	687.23	1473	889	3804	6004	1355	6626	10397	625	2803	2724	2224	1131	134	101	136	221	102.23	253.23	49.23	551	3933	3941	3565	2974	253
12.05_993.88_11.99_988.93	TAG 60:2;	[M+Na]+_[M+NH4]+	QPNVLDQSHXVPMG-JMYPUKFOSA-N	993.8835_988.9299	ESI (+)	12.0205	234	7587.06	4088.06	2516	712	1011	9977.06	2389	11130.1	13631	14032	13415	5282.06	4963.06	4986.06	5466	5335	357	172.06	72	102.06	82	44.6	39.06	7808.06	8183	7743	3247	1208	582
12.22_988.92	TAG 60:2; TAG 26:0-17:1-17:1;	[M+NH4]+	IYWDQWUXXDOBTD-QXKKBDLUNA-N	988.923	ESI (+)	12.217	3674	41	34	2.75	43	38	56	36	33	2.75	42	47	67	57	45	41	32	3520	2.75	2.75	2.75	30	2.75	119	49	73	42	28	112	4753
11.91_991.87_11.89_986.91	TAG 60:3;	[M+Na]+_[M+NH4]+	IJOXAPFYWITIHW-KUBXGBLDSA-N	991.8743_986.9111	ESI (+)	11.903	330.61	2236.61	1404.61	639.61	344.61	482	2768.61	1102	3327	3521.61	3960	3450.61	6018	5170	5550	5348	4029	95	118	111.61	57.61	128	97	138	2505.61	2708	2254	2277	220.61	363.61
11.80_984.90	TAG 60:4;	[M+NH4]+	WECVQMVSEHWZQR-ULZSGHTGSA-N	984.895	ESI (+)	11.796	800	3051	2110	1251	700	1081	4402	2447	4855	5475	5482	5328	3352	3231	3095	2905	2130	1868	67	51	82	4.93	49	4.93	3663	3489	3224	2447	2127	1649
12.25_1002.94	TAG 61:2; TAG 27:0-17:1-17:1;	[M+NH4]+	ZSFIWHGFIYVECX-QXKKBDLUNA-N	1002.94	ESI (+)	12.251	2809	80	1.44	1.44	45	31	71	56	64	47	46	28	1.44	50	1.44	38	27	380	1.44	1.44	1.44	42	1.44	45	1.44	77	1.44	67	35	4148
12.16_1018.97	TAG 62:1;	[M+NH4]+		1018.97	ESI (+)	12.161	111	0.7	106	0.7	583	690	44	1708	32	0.7	62	23	71	0.7	57	615	449	119	0.7	36	36	69	145	66	50	92	83	1269	1128	700
12.04_1021.91_12.04_1016.96	TAG 62:2;	[M+Na]+ _[M+NH4]+		1021.913_1016.9583	ESI (+)	12.0435	491.96	2514	1851	352	174.96	259.96	5036	506	5396	6704	6697	7801	1181	1627	1517	1326	150.96	140	78.96	208.96	174	67.96	54.96	88	2832	3067	2801	815	152.96	314
11.98_1014.95	TAG 62:3;	[M+NH4]+	QSEFCNRWIMUGOX-QFXJXGHKSA-N	1014.95	ESI (+)	11.98	41	799	453	280	1.16	17	1481	22	1309	1285	1923	1661	1182	1094	1065	124	238	53	38	46	1.16	87	53	51	1144	766	684	647	1.16	84
11.93_1012.93	TAG 62:4;	[M+NH4]+	AHXIACCOHSVLRP-ULZSGHTGSA-N	1012.93	ESI (+)	11.928	116	874	549	188	112	328	1191	498	903	1143	1440	1159	278	499	330	331	235	40	54	64	3.41	46	52	3.41	496	607	593	460	296	34
12.09_1044.99	TAG 64:2;	[M+NH4]+		1044.99	ESI (+)	12.087	139	771	583	417	107	204	1124	270	1230	1468	1341	1718	310	218	403	78	53	21	160	57	61	28	12	35	745	751	877	25	246	761
4.75_719.57		[M+H]+		719.573	ESI (+)	4.754	1759	3.75	3.75	3.75	3.75	101	3.75	3.75	3.75	3.75	3.75	3.75	1825	2092	2125	2047	1865	2164	38	49	152	44	3.75	237	3.75	3.75	3.75	3.75	3.75	3.75
10.64_549.49		[M+H]+		549.487	ESI (+)	10.642	569	720	868	505	568	735	8526	7545	9408	11164	11654	10897	9728	9075	9441	9429	8117	8879	69	140	74	25	92	118	3553	3629	3261	3307	3331	3316
4.97_858.60		[M+H]+		858.604	ESI (+)	4.97	1552	1651	526	615	1637	2524	4.21	604	927	4.21	4.21	323	4.21	4.21	455	467	494	472	4.21	64	42	43	4.21	4.21	210	422	468	575	908	1115
9.23_738.66		[M+H]+		738.663	ESI (+)	9.228	1227	1585	1670	1188	1263	1665	3095	3048	3306	4026	4064	7126	2660	2410	2566	2377	4.83	220	134	128	66	150	91	48	1727	1557	1669	1482	1472	1487
10.58_951.82		[M+H]+		951.816	ESI (+)	10.577	508	514	795	373	240	842	3674	797	1464	1528	2722	2176	9051	8576	10138	8899	8110	8309	30	2.9	29	2.9	51	2.9	1003	1325	880	385	1236	1429
5.28_1475.15		[M+H]+		1475.15	ESI (+)	5.284	1929	1392	1453	1098	1917	1923	1697	3152	2928	2368	2738	2764	29287	35668	43432	43991	41343	43350	4.94	196	49	187	138	90	2307	2823	2737	3249	3719	4343
5.35_864.52		[M+H]+		864.525	ESI (+)	5.35	783	740	876	725	1107	866	1698	1768	2099	2510	1843	2288	5322	5155	4292	5275	4696	4808	55	106	115	48	89	124	2214	2630	2262	2475	1614	2180
11.03_551.51		[M+H]+		551.508	ESI (+)	11.031	157	194	625	321	370	507	2486	2249	2340	2975	3397	3468	12842	13139	13887	13214	11647	12822	120	67	185	82	194	248	1744	1698	1485	1840	1732	1576
10.70_601.52		[M+H]+		601.52	ESI (+)	10.699	194	150	139	57	112	184	1588	1351	1393	1801	1958	1900	23550	23160	24506	23838	21171	22603	52	3.58	3.58	58	52	62	1005	686	897	1153	1048	1130
10.39_808.74		[M+H]+		808.738	ESI (+)	10.393	2380	3165	5009	3635	2769	3974	186597	180412	243823	274868	263887	235837	5641	5137	6091	5165	4559	3500	575	501	591	486	437	589	75871	74200	71996	71562	70859	69956
5.27_838.51		[M+H]+		838.509	ESI (+)	5.266	4.22	4.22	4.22	4.22	4.22	4.22	352	317	625	4.22	765	4.22	9626	9223	8506	8379	8646	7942	4.22	60	57	137	102	4.22	4.22	4.22	295	4.22	4.22	331
5.05_627.53		[M+H]+		627.535	ESI (+)	5.054	4579	11611	7948	4739	7274	11293	4973	5325	6536	7239	7379	6406	50846	54053	83262	135505	197930	319605	26	25	60	35	2.49	32	7668	8160	8320	8493	8833	3319
5.05_887.57		[M+H]+		887.567	ESI (+)	5.051	1382	2758	1950	1050	1767	2771	1283	1213	1907	2087	1445	1774	12529	13541	20085	32478	46768	73520	30	26	70	35	2.65	69	1310	2179	2195	2031	2279	935
11.05_577.52		[M+H]+		577.524	ESI (+)	11.047	441	767	1173	645	793	1121	7898	6685	8717	9185	11329	9626	47382	46867	47413	46313	42255	44141	3.38	3.38	34	40	122	95	3463	3441	3102	3170	3037	2940
5.04_776.58		[M+H]+		776.578	ESI (+)	5.035	432	303	1105	460	375	481	97	173	212	186	100	1.05	3754	4923	7000	8371	9131	14895	80	1.05	43	10	29	106	122	1.05	192	160	261	530
5.13_603.53		[M+H]+		603.535	ESI (+)	5.133	6727	7666	4780	2956	4970	7461	3555	3718	4650	5218	4959	3783	16340	17337	18481	18980	17091	18224	58	60	15	87	60	142	6962	6895	6736	7260	7683	8054
11.06_603.54		[M+H]+		603.537	ESI (+)	11.056	146	749	533	180	482	236	2427	2134	2596	2784	3587	3283	26284	25717	25810	25645	22979	23238	3.75	38	64	76	45	37	1354	1336	1148	1170	1205	1257
5.35_874.55		[M+H]+		874.546	ESI (+)	5.354	1349	1686	1614	1006	1538	1552	618	646	807	1105	855	945	1591	1454	1903	1425	1460	1196	54	4.05	4.05	100	41	40	1247	1329	1361	1218	1407	1294
5.74_1533.11		[M+H]+		1533.11	ESI (+)	5.743	1356	1435	1286	598	2244	2830	691	1526	1004	1653	1648	2074	1922	3888	6078	6528	5985	4378	5.01	91	50	67	5.01	68	870	1842	2208	1177	2527	2759
11.22_591.54				591.536	ESI (+)	11.225	2115	3184	3070	1408	1994	2835	16401	15880	16807	19855	20747	18832	339	235	444	386	323	291	4.24	55	113	4.24	54	42	6771	6510	6566	6403	6583	6789
11.22_589.52				589.521	ESI (+)	11.22	696	995	926	331	613	925	7606	7203	7996	9261	10735	9374	60	51	38	92	35	57	2.62	39	2.62	27	26	80	3146	3095	3137	2920	3367	3386
5.68_687.50				687.497	ESI (+)	5.68	10807	5995	3975	3770	6763	7856	8322	8794	8644	8117	9690	9678	3.03	73	3.03	64	3.03	30	3.03	90	3.03	106	3.03	30	5311	5522	6240	7342	7841	8104
6.44_691.55				691.545	ESI (+)	6.441	1825	2679	1691	732	1363	1863	2747	2861	4304	4320	4597	4885	110	95	50	48	4.76	72	4.76	83	70	86	75	67	3415	3678	3482	3662	3529	3492
4.96_719.54				719.541	ESI (+)	4.955	15622	28233	27536	16795	19100	25703	15185	14085	17447	18336	18392	19039	5.21	5.21	5.21	333	5.21	155	5.21	5.21	5.21	54	52	68	30693	28936	28370	28241	26429	25440
5.66_730.54				730.537	ESI (+)	5.657	6575	6628	6209	3233	5814	7108	17878	20620	24294	25258	24826	23600	5.13	87	109	5.13	5.13	118	76	63	76	71	51	76	31876	31949	33767	34630	34227	37476
5.70_746.57				746.571	ESI (+)	5.7	154573	205164	209689	108741	155153	221065	30125	31541	36750	43954	37492	38576	659	2098	1507	773	2073	5.82	58	69	156	357	166	321	129100	110856	102458	104229	111648	138650
5.55_754.54				754.54	ESI (+)	5.552	9031	15499	13198	6802	9259	12981	10340	11287	14148	15886	13228	11911	3.28	3.28	3.28	107	84	3.28	33	90	61	60	148	112	14620	14724	14774	15304	15816	17232
5.27_757.55				757.554	ESI (+)	5.266	3120	3321	3007	2728	3003	3611	3322	3803	3281	3385	3544	3429	3456	4064	4086	1984	2179	2425	1052	1157	1512	1535	1589	1771	4202	4118	4125	4361	4524	4646
4.84_758.56				758.561	ESI (+)	4.841	6914	5402	6866	3281	7196	10897	3491	4214	5144	5559	5113	5130	2546	2511	3884	4121	3564	4002	148	67	129	102	92	46	4326	6207	5351	5984	7450	8250
7.04_756.59				756.591	ESI (+)	7.036	5616	3076	2109	2446	3748	4376	9336	9387	11010	11842	13465	12542	201	89	204	113	97	478	4.28	106	69	47	43	73	16415	16451	17049	17360	17202	18057
6.12_760.59				760.585	ESI (+)	6.125	18884	21314	17077	10616	15077	21345	2059	1002	4093	5612	6418	3771	28391	24943	26886	23636	23446	25821	77	7.7	104	7.7	7.7	7.7	8749	6663	7573	5301	7027	6183
5.37_766.54				766.539	ESI (+)	5.369	8108	9486	8892	4539	7767	10725	5006	5912	7368	7883	7329	6746	10.34	10.34	10.34	10.34	10.34	1290	300	165	177	140	103	140	7535	7503	7506	7925	7921	9175
4.39_769.54				769.545	ESI (+)	4.392	3168	3043	3186	1732	3518	4995	4086	6555	7965	7706	6675	6018	51	110	7	149	52	110	84	71	0.74	51	140	113	3357	3400	3908	4750	4993	5853
5.80_768.55				768.555	ESI (+)	5.805	97788	109321	77317	44371	81122	121039	66786	76159	84052	89941	90543	83945	6.04	6.04	6.04	6.04	6.04	6.04	60	125	499	85	112	6.04	43445	45728	46883	49150	51143	56410
4.18_780.55				780.548	ESI (+)	4.18	6843	7509	6867	3528	6135	10337	642	1791	1295	1406	1608	1466	367	750	296	369	159	263	42	91	46	34	43	76	2729	2293	2338	2924	3084	3913
5.62_781.56				781.559	ESI (+)	5.622	8984	9773	8311	4325	8351	12390	4633	6675	6380	7209	7548	6726	2454	1522	2730	2913	1200	615	89	8	0.79	53	0.79	0.79	5309	5323	5792	6195	6434	7741
5.63_780.56				780.556	ESI (+)	5.634	19485	21560	17168	6900	17078	24497	10259	14453	15705	15564	15145	16112	1689	1827	1959	1095	313	1236	37	3.73	3.73	40	3.73	3.73	10157	10790	11253	12751	13134	15203
4.68_782.56				782.558	ESI (+)	4.68	9121	14241	13146	6967	8263	12028	6230	5540	6929	8687	5674	6153	1367	1644	1503	1842	1963	1746	1693	1537	553	738	2000	1788	8727	8649	8017	8560	6761	9065
4.67_781.56				781.557	ESI (+)	4.667	37733	39223	40478	17700	26029	41000	13881	12708	23949	25067	19764	17370	2903	2870	3005	3126	2906	2905	61	58	98	48	54	73	25329	25238	25461	26639	20351	17251
4.89_785.58				785.579	ESI (+)	4.892	3418	2714	2719	1242	3467	5532	2047	2354	3198	2507	2634	2561	2319	3017	3823	3155	3291	3343	59	118	159	54	35	142	4456	4929	5175	5181	5769	5872
5.51_789.53				789.526	ESI (+)	5.509	19820	4.37	4.37	9948	9392	4.37	14472	17868	18910	19531	19376	18377	4.37	4.37	4.37	4.37	4.37	4.37	4.37	44	207	72	66	58	17578	18927	19722	19750	20033	21065
4.66_788.52				788.523	ESI (+)	4.664	11770	11845	7797	4116	7652	11340	6088	7847	8929	9162	8780	7791	4.52	73	4.52	4.52	4.52	4.52	4.52	45	4.52	4.52	4.52	4.52	6819	6850	6641	7261	7344	9095
5.26_792.55				792.555	ESI (+)	5.259	13561	22191	19147	10057	13900	17559	13518	13035	17544	19780	15547	15197	11.11	11.11	11.11	11.11	11.11	11.11	11.11	11.11	11.11	111	11.11	11.11	17689	17430	16340	16332	14402	14834
4.67_795.56				795.56	ESI (+)	4.667	43536	44998	41059	17821	39254	61661	23619	31681	35896	41473	35459	31389	80	82	78	0.9	88	9	31	44	0.9	41	49	88	27508	28355	28870	30814	33087	40066
4.95_794.57				794.571	ESI (+)	4.954	309275	445363	374164	168387	275977	388709	215780	272084	327407	368471	284778	275917	8076	7975	9352	8703	7689	4880	101	193	485	147	179	314	205585	195399	193569	221798	260855	356788
6.08_796.59				796.592	ESI (+)	6.083	4839	5244	4041	1729	4127	7183	2382	3805	4925	5211	5696	5193	5.9	5.9	5.9	5.9	5.9	5.9	143	59	66	5.9	89	118	3164	3125	3654	3677	3940	4675
4.65_804.55				804.553	ESI (+)	4.65	20565	22661	14831	7166	14302	20621	14013	16522	19231	23241	18176	16782	1853	1940	2004	1282	1781	1455	1071	1140	1177	1049	1017	841	19751	18326	18847	18585	20027	25465
4.97_804.55				804.553	ESI (+)	4.971	11794	16729	14756	6794	10846	16255	8810	11453	11620	12394	11548	10542	13936	13381	14407	12865	9868	8304	548	378	350	412	149	487	17950	14413	14371	14663	15191	19275
5.05_805.56				805.558	ESI (+)	5.051	3094	4114	3786	1715	2342	5321	3531	3782	6720	6091	6804	6200	1158	1687	1398	428	224	91	282	240	325	316	199	160	3956	5014	4366	4404	4026	4039
4.64_805.56				805.558	ESI (+)	4.64	10852	11519	7471	3358	7444	10237	7395	8708	9933	12151	10865	8644	770	853	908	879	654	653	340	149	427	317	239	254	10592	9520	9763	9397	10275	13125
10.61_810.76				810.755	ESI (+)	10.609	406	306	474	231	258	181	10682	10596	16009	17791	15374	13780	373	698	651	981	1039	1034	240	264	133	280	189	242	5832	5756	5538	5608	5334	5562
6.93_817.68				817.68	ESI (+)	6.933	18430	26937	15710	7433	14163	22727	12922	14440	21688	22935	23877	22529	133	44	407	97	451	143	4.41	4.41	85	94	4.41	57	14842	15986	15872	16749	16143	16079
10.47_822.76				822.756	ESI (+)	10.471	644	1355	4856	1193	373	188	51709	42359	57565	75585	70224	63255	91	212	319	126	253	246	3.33	97	65	33	111	244	26123	19949	29441	26653	18263	21532
4.30_828.56				828.556	ESI (+)	4.298	148126	163392	90287	42515	95478	152515	97857	125655	159275	169401	131604	120628	52	3.6	3.6	3.6	3.6	3.6	58	202	113	36	115	3.6	94444	95843	99242	104943	111310	127827
4.68_830.57				830.567	ESI (+)	4.677	111613	162831	85510	33825	72763	98220	80515	78053	118389	158355	113205	100713	3578	3657	4076	4112	3912	4423	50	82	101	79	100	151	63305	62640	61385	60902	61970	78025
5.24_830.57				830.568	ESI (+)	5.241	8733	10440	7527	4477	6788	9934	8453	9399	11715	12262	11272	10709	16293	17901	20260	20594	19708	20998	78	72	196	75	51	184	7932	7978	7885	8150	8880	8702
4.41_830.57				830.57	ESI (+)	4.407	46907	39410	24311	12177	36070	55082	35310	58141	63740	62188	60073	51816	229	441	400	420	279	369	4.82	74	107	49	48	84	18231	20213	23225	26451	28533	33726
9.86_830.72				830.723	ESI (+)	9.863	3769	5402	8575	4995	5056	6783	12309	11424	12683	14302	15527	14535	306	260	222	307	307	287	4.4	44	4.4	61	53	4.4	7523	7406	6932	6803	7195	6914
10.92_838.78				838.782	ESI (+)	10.916	5656	6318	10606	5998	7135	9046	81175	82356	83941	96289	118115	104099	287	470	812	974	1141	1685	113	364	400	455	821	1268	52446	50809	51207	52530	53149	55131
10.73_843.75				843.745	ESI (+)	10.735	2355	4042	2889	1357	2018	2794	11736	10855	12539	14704	12822	12030	250	28	88	57	172	231	457	269	300	2.82	471	178	8338	8614	8755	8110	8180	8990
9.95_857.74				857.743	ESI (+)	9.95	4606	6075	7629	4391	4469	6723	21744	19755	25085	27642	30420	26921	397	202	288	107	119	116	50	35	66	33	35	3.3	11612	11051	10863	10736	10798	10503
10.25_858.75				858.755	ESI (+)	10.246	9789	14451	16588	9455	9726	14764	47023	41899	49199	56140	65664	59772	2509	2504	2216	2047	1426	1431	66	42	49	3.13	42	31	27472	27456	26102	26201	25874	25708
10.30_859.76				859.758	ESI (+)	10.304	6395	8947	8682	5130	5228	7091	37984	36059	41406	47359	48877	45755	717	880	1115	1058	982	963	34	3.39	73	61	40	95	19387	17845	18056	17811	17938	17323
10.31_858.76				858.757	ESI (+)	10.313	6208	14451	12383	6262	7048	9892	57457	54693	62188	71197	75840	68765	1817	1526	1962	1659	1662	1906	31	32	48	27	2.74	54	25844	25167	24759	23928	23136	23684
10.40_862.78				862.781	ESI (+)	10.404	1428	1896	2073	1227	1309	1537	15030	14841	18393	19687	21425	21009	856	670	1235	1030	321	1012	44	2.53	2.53	103	25	46	10756	10881	10519	10523	10495	10075
10.56_862.77				862.774	ESI (+)	10.556	4310	6533	8549	5285	4853	7268	111578	108637	125189	135674	168804	152511	2561	1684	2465	2496	2036	1922	5.5	66	55	116	5.5	80	51825	51591	50340	51155	50819	51583
10.54_861.78				861.775	ESI (+)	10.537	12952	16465	24030	13943	13878	20285	334188	318131	364500	401478	500220	449463	17340	17079	17951	17308	15710	16183	125	176	128	156	125	12.47	155639	152259	147878	149441	152465	153748
10.91_866.81				866.807	ESI (+)	10.915	2669	267	1363	1053	2335	2571	8033	13729	12721	13542	19012	8731	477	730	1211	1208	2024	2508	359	537	967	1364	1503	1249	3094	5575	4844	5785	3660	6399
10.92_865.80				865.796	ESI (+)	10.916	3266	4016	5569	3789	3927	5423	80285	79056	91684	103154	114212	100702	1705	930	913	1246	1474	1744	190	462	808	1016	1204	1156	34204	33011	32555	32658	33118	33238
10.42_868.69				868.693	ESI (+)	10.422	1629	1691	2256	1427	1591	2077	8451	8334	8449	9178	9728	9260	223	575	523	616	352	732	3.82	3.82	47	38	76	3.82	5464	5315	5213	5246	4895	6613
9.83_869.74				869.744	ESI (+)	9.832	13186	18845	16840	9388	10695	15631	50734	47914	60826	67705	71195	66077	1327	1098	1405	1137	816	415	72	88	43	41	32	124	24076	23697	23072	22681	22929	21871
9.83_868.74				868.74	ESI (+)	9.831	21142	30128	26862	14849	18044	25580	83009	78451	100053	107214	115014	109599	1909	1707	2055	1451	1290	1096	4.75	52	48	4.75	59	4.75	39751	37813	36986	35639	34466	34204
11.31_870.76				870.763	ESI (+)	11.314	1792	179.18	7615	3652	3424	7270	21298	20104	21148	21462	20242	22127	179.18	179.18	179.18	179.18	179.18	179.18	179.18	179.18	179.18	179.18	179.18	179.18	12963	13109	13245	11595	12036	12317
11.31_869.76				869.76	ESI (+)	11.311	1621	2971	13899	5383	8172	12032	33370	31712	31810	36654	33346	35058	162.11	162.11	162.11	162.11	162.11	162.11	162.11	162.11	162.11	162.11	162.11	162.11	20871	20865	21410	22154	19606	20205
10.14_871.76				871.756	ESI (+)	10.138	15156	21091	16872	8672	11481	17081	33214	32920	36551	39862	46786	41390	13208	12191	13515	12971	11461	11854	4.66	52	4.66	52	47	64	21572	19899	20334	20456	20140	19912
10.14_870.76				870.756	ESI (+)	10.142	24418	33237	25959	14653	18662	26848	49243	51717	61119	64063	76507	70601	20993	19295	21005	18462	16796	18834	54	36	36	3.62	39	58	33081	32323	32379	32534	32786	31423
10.32_874.78				874.777	ESI (+)	10.317	1712	2445	2703	1554	1324	2237	12283	11087	13736	14747	15604	14275	295865	289415	328878	319943	290208	307375	37	103	41	58	28	2.81	11346	10793	10958	10993	10503	10949
9.56_880.74				880.739	ESI (+)	9.557	3989	5525	5897	3211	3889	5485	13933	13266	17882	18966	19282	18206	194	174	206	177	60	329	54	2.2	22	36	30	57	9224	9289	9102	8367	8424	9277
10.74_883.71				883.709	ESI (+)	10.738	6499	6971	5858	4500	4970	6080	9735	9326	9937	10789	9751	9186	3.8	3.8	3.8	3.8	3.8	3.8	3.8	45	3.8	3.8	38	47	8697	8367	8550	8724	8722	9843
11.77_881.80				881.8	ESI (+)	11.773	2292	118.46	118.46	118.46	1231	4152	10714	13125	14200	13116	17620	16009	118.46	118.46	118.46	118.46	118.46	118.46	118.46	118.46	118.46	118.46	118.46	118.46	13972	11202	12503	9764	9464	9045
10.72_887.79				887.791	ESI (+)	10.723	25349	39240	33521	16986	22730	32807	119428	112248	127466	142829	144921	136095	2340	1362	2284	3006	1779	2037	29	29	107	2.85	33	67	72437	70966	70888	66999	66368	62432
10.65_894.84				894.836	ESI (+)	10.654	283	5.28	176	242	549	456	6432	7445	7760	7127	8785	8468	4432	4768	4727	4659	4673	4683	88	67	91	81	53	64	3326	3701	3241	3718	3597	3456
10.64_892.83				892.828	ESI (+)	10.642	5.4	5.4	5.4	5.4	5.4	5.4	33898	34111	37994	37427	47244	43593	21157	21557	21492	21214	20658	19409	54	134	120	90	70	229	12639	15774	13612	12408	16143	14364
10.37_897.77				897.772	ESI (+)	10.373	4257	8992	7090	4091	4499	6650	21476	17424	24727	26398	26855	25669	6279	5613	6711	6159	5447	5347	33	59	76	34	33	3.3	9128	8983	8173	8280	8140	6302
10.38_896.77				896.765	ESI (+)	10.381	5623	13131	9988	6126	5255	9056	30008	22367	33484	36889	36787	33799	9263	8841	10155	9416	8083	8287	2.68	30	28	43	27	30	12121	12332	10742	10615	10331	5927
11.05_898.74				898.744	ESI (+)	11.052	295	362	847	231	364	771	5320	5045	5733	6284	6845	4985	12696	12724	12616	12814	12027	14578	43	51	40	80	79	90	2326	3201	3591	3363	3565	4302
10.85_901.80				901.802	ESI (+)	10.847	19978	26559	19041	10971	13091	19000	199373	194063	220772	242801	300632	270217	26409	26379	25233	21290	21083	14411	32	53	155	103	105	56	108812	110158	106496	107273	108699	106332
10.95_910.74				910.743	ESI (+)	10.947	191	787	1241	636	245	502	5802	5671	5784	6151	6338	6869	199	286	644	790	284	442	1.53	15	39	58	1.53	53	3858	4001	4185	3734	3654	4373
10.93_909.74				909.739	ESI (+)	10.933	4.51	112	1701	1014	706	914	8601	8247	7366	9562	9837	7864	965	632	1029	610	828	1333	45	4.51	46	4.51	4.51	72	6290	5934	6042	5393	4511	6098
10.36_910.79				910.787	ESI (+)	10.359	11942	16065	14071	7960	8460	13203	84686	79707	92555	101501	125341	115097	3147	2854	3642	3159	3018	2854	51	48	174	2.84	28	37	29240	28751	28255	27683	27917	28150
10.10_923.79				923.786	ESI (+)	10.096	1111	1834	1128	1069	884	1468	6663	6788	8229	8652	10578	9835	3525	3439	3621	4025	2981	3113	75	65	13	129	84	72	3259	3098	2910	3046	3262	3213
10.45_923.79				923.785	ESI (+)	10.449	19423	24929	16786	9703	12701	20449	58047	56707	64507	74264	91916	81457	8593	7111	6001	4824	4075	1445	134	94	18	1.76	61	1.76	25565	25551	24335	24069	25150	24591
10.47_922.79				922.789	ESI (+)	10.469	29262	37052	25217	13782	19032	29624	88475	87594	99170	110914	143316	126931	4570	3316	4439	3198	1582	822	8.5	8.5	8.5	85	8.5	93	38758	38763	38528	37603	38833	38623
11.22_923.75				923.749	ESI (+)	11.217	2345	3308	2935	1746	2453	2386	12353	11108	11827	13449	14110	12116	624	878	311	456	382	316	3.87	3.87	3.87	115	50	39	7538	7390	7537	7375	6919	8666
10.42_937.81				937.808	ESI (+)	10.42	2400	3262	2268	1384	1734	2267	12520	12634	13671	14571	17433	15684	219	344	530	268	534	2.7	35	31	36	47	48	27	4342	4865	4450	4361	4768	5057
11.14_940.84				940.837	ESI (+)	11.145	4266	4622	2733	1517	2444	3849	23537	23899	26623	30511	37094	30511	382	1.86	627	121	1.86	116	1.86	55	1.86	1.86	1.86	35	6701	6136	6258	6358	6336	7084
11.05_941.84				941.836	ESI (+)	11.046	1947	3092	2060	947	1239	2036	23617	22351	21606	28460	35667	31070	390	3.09	3.09	3.09	502	3.09	88	33	3.09	31	57	34	7080	7269	6709	6999	6630	6654
11.47_943.85				943.848	ESI (+)	11.466	2220	2318	2281	1254	1653	2144	11504	10890	12583	14433	15170	13925	169	203	118	81	63	55	2.69	27	2.69	2.69	40	27	4600	4488	4565	4106	4029	3591
11.46_942.85				942.848	ESI (+)	11.46	1134	3784	2831	1635	1999	3007	15327	14406	16429	18936	21074	18683	3.03	258	3.03	112	125	98	30	3.03	37	43	54	34	5264	5384	5355	4652	5213	2208
11.13_953.72				953.718	ESI (+)	11.131	2057	2461	2072	1099	1730	2138	5903	5345	5875	5432	4782	5379	2.73	72	104	151	121	2.73	41	2.73	48	2.73	53	27	3564	4003	3244	3414	3922	4275
10.48_1350.38				1350.38	ESI (+)	10.485	1922	16190	1230	3345	528	862	13329	925	1537	1281	3367	1123	697	29046	301	230	229	2049	11210	886	1734	722	16076	2962	2006	4425	373	511	1458	2263
12.47_369.35				369.352	ESI (+)	12.471	226833	1620	1162	1159	910	785	1113	1014	1214	1313	1115	1067	433	156	833	590	731	107774	1594	1698	1445	1268	1053	222879	1305	1256	945	866	831	214573
8.98_940.74				940.737	ESI (+)	8.978	4197	5629	3503	1031	2611	4379	7582	7008	9357	10062	10768	10818	2.7	2.7	2.7	2.7	2.7	2.7	41	93	27	40	38	55	5730	5737	5544	5569	5641	6103
10.12_863.71				863.71	ESI (+)	10.116	2949	3524	4587	3131	2497	3899	21463	20788	24165	25589	29159	27978	2102	2111	2308	2097	2026	2159	27	72	31	40	3.13	62	12361	12802	12490	12564	12361	12204
4.94_810.54				810.542	ESI (+)	4.941	22565	49587	32725	25334	32049	36725	12449	10779	17088	15001	11364	19544	6.15	6.15	6.15	1109	1486	3105	6.15	6.15	123	62	6.15	171	24987	17833	21982	12111	14511	17370
2.82_466.33				466.329	ESI (+)	2.82	358	3963	3538	2142	2490	3588	8794	5052	6946	9409	11732	9922	1603	1785	1781	1562	1462	54	69	5.36	5.36	69	5.36	59	7271	6746	6673	6212	5552	777
4.94_627.53				627.534	ESI (+)	4.94	5733	7906	5004	2824	4590	7151	4380	4350	5279	6413	5869	5217	317	404	391	144	347	753	3.25	54	3.25	3.25	33	62	4225	3784	3788	3862	4083	4457
12.02_1002.94				1002.94	ESI (+)	12.022	517	5431	3662	2092	2494	3292	7907	6532	8021	9909	9917	8966	41	576	577	598	476	126	96	38	95	105	137	41	6121	5463	5045	4879	4850	181
4.63_885.55				885.549	ESI (+)	4.632	70503	70476	55529	29143	51147	77861	33873	37562	42459	46815	49638	46237	292	136	364	395	237	151	112	34	140	3.65	69	37	46822	47250	47448	49171	52555	62102
11.97_960.90				960.897	ESI (+)	11.968	2553	1295	934	7026	7508	10692	1246	15110	25733	1769	26141	26170	80	43	50	667	7533	5100	57	123	41	72	4.31	133	1223	2609	19363	16676	15702	5362
4.61_742.54				742.538	ESI (+)	4.608	45212	39920	44215	19037	60438	87983	14845	18327	24273	27112	21827	19676	205	102	192	210	224	109	45	39	83	3.34	110	33	18446	19681	20638	21384	31276	39050
0.59_123.12				123.116	ESI (+)	0.59	44077	7751	8161	4738	5289	3688	4530	10204	4506	3593	4481	3888	604	1665	1532	1324	1260	5576	2562	3769	3143	2651	3421	10295	2604	3583	5588	5926	2581	8475
5.31_807.57				807.57	ESI (+)	5.312	9278	9972	8433	6427	8190	9873	9697	13124	15212	14046	14947	13878	12835	12320	24299	14555	22898	23511	3094	3974	4274	4329	4057	4250	12172	13767	15109	16407	16710	17759
4.63_625.52				625.52	ESI (+)	4.629	251555	255153	194665	100837	178759	272009	124377	129699	149558	170665	178006	166787	1101	868	1352	1234	1125	478	32	81	136	71	124	190	167333	165348	169494	174482	181001	217562
0.54_229.15				229.153	ESI (+)	0.535	21054	2105	316	160	1916	106	132	2693	2418	2406	179	1040	10.61	1465	1187	837	356	4245	209	1020	1938	1860	155	7714	10.61	944	773	1878	629	6829
0.55_169.12				169.121	ESI (+)	0.554	21276	4569	5003	2334	3212	2276	2226	6054	2656	2081	2780	2390	334	1240	710	784	751	3104	1624	2358	1867	1882	2228	6994	1830	2445	4027	3954	1759	5544
0.57_473.32				473.323	ESI (+)	0.575	23393	105	7412	179	5537	3558	2786	8339	3753	2635	4118	2064	66	90	211	72	149	481	197	522	297	381	583	596	210	59	4.21	2257	115	239
0.58_451.27				451.268	ESI (+)	0.579	51483	16532	16461	6868	12001	6848	6312	20413	8308	5277	8853	4093	62	1041	351	258	686	759	120	45	914	4.28	1058	1573	1178	2156	1744	5359	1300	1561
0.58_207.16				207.159	ESI (+)	0.583	24294	667	480	600	28897	1615	576	28085	352	501	488	540	383	164	502	664	12326	13565	293	558	424	943	26933	27303	525	506	541	682	21875	21135
0.58_226.18				226.18	ESI (+)	0.583	40839	21.86	21.86	21.86	18877	5966	21.86	6293	21.86	21.86	21.86	21.86	21.86	21.86	21.86	21.86	4704	5604	21.86	21.86	21.86	873	22674	21315	21.86	21.86	21.86	21.86	10199	11925
0.63_192.14				192.138	ESI (+)	0.631	101	3330	1873	2708	3677	3470	2031	4607	2597	3043	1688	2486	1348	1701	1406	1331	1527	283	2125	2484	2781	2264	3099	281	2743	2524	1172	2645	2744	416
0.96_256.23				256.227	ESI (+)	0.958	835	951	388	373	550	380	2485	2818	3085	2924	4239	3852	107	102	3.54	35	55	3.54	105	131	192	3.54	59	69	5879	6070	5859	7328	7048	7596
0.96_542.32				542.324	ESI (+)	0.959	33161	36005	10978	15657	12446	25219	15888	13956	19233	24529	20078	29877	183	146	209	173	385	546	16	34	51	1.64	99	32	12858	13913	15249	16629	17067	19266
0.97_500.28				500.278	ESI (+)	0.968	6723	7597	3577	5260	4815	7561	5843	5252	7046	8012	6674	9601	4.59	4.59	4.59	4.59	91	4.59	4.59	4.59	52	46	4.59	4.59	4393	5026	5070	5675	6629	6079
1.10_304.30				304.3	ESI (+)	1.102	3476	6337	3577	56387	3502	6083	8335	5439	5804	4942	2860	5773	2523	2344	1728	2425	3152	3980	5926	3719	4901	7926	3277	3836	3881	4335	4667	3713	4424	4875
1.14_270.24				270.243	ESI (+)	1.14	2.94	2.94	2.94	101	2.94	2.94	11289	10983	14527	16208	13825	11664	29	2.94	2.94	2.94	2.94	2.94	2.94	2.94	2.94	2.94	2.94	2.94	17064	16659	15624	17259	16727	17879
1.23_520.34				520.341	ESI (+)	1.233	4719	5050	1833	2960	2022	3911	5546	4241	4906	8393	6158	9238	12358	13591	15325	15800	15125	16480	167	180	121	77	24	137	7085	8064	7608	8430	8522	9066
1.25_478.29				478.293	ESI (+)	1.249	2753	2973	1407	1346	1658	2650	5032	4383	5416	7016	5820	7679	453	393	423	469	503	573	59	128	199	102	62	102	4103	4372	4395	4846	4938	5373
1.27_521.34				521.335	ESI (+)	1.266	699	2782	1499	1531	937	1472	2630	1507	1990	3176	2233	3429	4321	3842	4803	4994	4864	5516	1828	1238	881	566	391	440	3226	2801	2876	2941	3053	3447
1.30_544.34				544.34	ESI (+)	1.303	3000	2983	1531	1488	2026	2962	3876	3008	4428	4831	4414	4849	36750	40409	46293	46040	41882	44073	124	272	217	48	65	46	2944	2850	3000	2990	3482	3592
1.33_296.26				296.258	ESI (+)	1.327	274	214	162	87	131	193	1284	1653	2347	2393	1711	1406	40	128	121	94	59	218	157	59	61	65	38	259	3959	4101	3841	3811	4084	4398
1.35_332.33				332.331	ESI (+)	1.353	1734	2311	1509	72603	1366	4493	2793	1866	1571	2023	1056	869	2263	851	1357	911	3271	3847	4158	1461	2568	5192	2488	3160	2386	2113	2031	1810	2177	2521
1.37_269.21				269.208	ESI (+)	1.374	268	153	14108	7131	1739	1025	111	1260	1504	53	2114	10253	74	37	1773	2383	552	665	5154	2196	1353	5623	3060	2870	1243	10645	11666	1518	2089	1804
1.38_247.23				247.227	ESI (+)	1.376	784	1694	27442	11820	2824	1468	1731	2130	2621	2111	3543	19002	139	4107	3127	4542	1268	1018	192	4123	2276	11579	4259	4042	188	19986	22274	2388	3572	2983
1.44_284.26				284.259	ESI (+)	1.443	5159	6068	1965	1465	1373	2265	54135	54441	72036	77444	60766	52013	77	48	54	118	53	137	103	101	181	4.82	139	247	84400	84981	84925	85533	88092	89536
1.48_332.33				332.332	ESI (+)	1.484	3239	5098	3030	177825	3438	8437	5675	5039	3815	4364	2154	1742	5099	2063	3472	1945	7190	8431	10228	3183	5812	12113	5017	6510	5168	4887	4202	4052	4355	4947
1.51_346.27				346.274	ESI (+)	1.507	172	318	223	123	93	329	2454	2948	3500	4443	2890	2250	27	24	23	44	45	2.3	40	36	60	73	85	60	3414	3503	3199	3229	3071	3661
1.54_272.26				272.258	ESI (+)	1.54	1140	1773	987	741	805	1156	13770	12895	14722	16217	13054	11077	302	163	191	326	127	85	325	260	338	2945	250	307	9047	8884	9735	9045	9340	9588
1.60_322.27				322.274	ESI (+)	1.599	460	431	505	442	435	418	7666	7961	11185	12329	6243	6205	79	137	63	199	26	105	105	133	102	157	115	188	7201	7000	7405	7373	6770	7574
1.65_332.33				332.332	ESI (+)	1.653	9797	15881	9076	251077	8236	15373	17766	12630	12968	12869	6347	9251	7705	5257	5395	4476	12163	14318	21964	7937	12245	25098	10087	11530	11767	10574	10304	9830	12844	12416
1.72_298.27				298.275	ESI (+)	1.716	297	366	340	390	167	270	8430	7362	9005	10371	6196	5541	20	17	74	5	62	33	125	26	108	110	110	142	6981	7151	6598	7103	7103	7831
1.80_480.31				480.309	ESI (+)	1.803	3893	3060	3647	2544	3122	4440	3951	3623	3539	4215	5479	5182	1030	1194	1324	1492	1142	1020	31	53	66	24	40	38	2815	3086	3223	3418	3982	3789
1.98_326.38				326.378	ESI (+)	1.984	3150	3499	4148	6368	2146	6197	9983	13846	6825	8627	3081	13259	1945	3374	1189	4394	2504	3252	4566	4838	4743	87.43	2425	3151	4795	4391	4540	4985	5489	6310
2.06_468.39				468.39	ESI (+)	2.059	2520	3244	12354	6192	1945	3840	5097	17214	5182	1715	1925	1325	920	1839	807	686	985	1255	1559	3217	1379	3211	4083	4313	3114	2582	3205	2826	2957	3136
2.17_360.36				360.363	ESI (+)	2.173	1317	2011	1327	63983	1502	2225	2540	1855	1548	1607	860	664	2320	1025	1507	703	3008	3241	3844	1223	2307	4797	1996	2400	2183	2011	1766	1472	1724	2146
2.18_312.29				312.29	ESI (+)	2.183	612	852	654	523	439	495	5360	4735	7509	8608	6605	5297	2.28	90	64	56	79	94	52	23	76	2.28	39	150	3832	4152	3890	3909	4061	4188
2.39_360.36				360.362	ESI (+)	2.386	3864	24	3608	116359	3526	5407	134	5180	5107	5246	2905	3265	287	166	2306	1869	5735	6491	9510	159	4946	17065	4204	4817	152	4990	4595	4246	5266	5353
2.57_482.33				482.325	ESI (+)	2.569	401	8395	9088	5002	894	1763	14574	1787	14067	16132	18454	14534	3361	3247	3278	1200	623	282	39	45	48	443	18	1.77	9474	9922	9405	2514	798	429
3.36_381.30				381.298	ESI (+)	3.359	29914	41880	505	6337	14698	26053	2751	745	563	446	37755	729	630	794	662	791	744	505	662	476	942	660	692	1186	8839	10467	10295	10546	11589	10696
3.46_667.44				667.443	ESI (+)	3.465	222603	259083	66510	33428	56578	80254	2.26	28	26	143	56	2.26	28	2.26	27	41	30	31	34	45	27	2.26	85	133	11913	11490	11983	12295	12596	13554
3.46_505.39				505.39	ESI (+)	3.465	81248	99618	25987	13988	21329	29528	132	141	260	449	118	110	247	440	167	221	91	193	594	380	363	205	134	172	5459	5188	4947	5088	5182	5754
3.46_689.42				689.425	ESI (+)	3.465	90454	102095	29087	16138	28223	39372	36	0.72	44	0.72	0.72	28	0.72	0.72	36	0.72	34	35	41	0.72	0.72	49	0.72	0.72	4995	5425	5799	6191	6757	6742
3.61_681.46				681.458	ESI (+)	3.611	47104	52431	15933	8093	13156	18376	0.67	83	38	35	68	0.67	0.67	36	0.67	28	29	0.67	0.67	42	36	0.67	48	31	2973	2888	2848	2902	3005	3483
3.92_695.47				695.473	ESI (+)	3.921	65892	63332	14761	7707	14508	21543	59	28	38	1.07	48	65	1.07	40	50	51	42	1.07	26	24	48	1.07	70	1.07	3320	3110	3035	3535	3469	4439
3.97_906.48				906.479	ESI (+)	3.972	8568	8652	6263	3689	7136	9619	5730	8579	9880	8527	8978	8732	2.92	52	29	62	2.92	2.92	34	41	59	2.92	74	2.92	4503	5811	5955	6685	6693	7726
4.04_683.47				683.474	ESI (+)	4.04	47917	55853	12557	6213	9818	15987	26	36	29	47	2.38	2.38	2.38	2.38	2.38	28	24	2.38	25	35	2.38	102	46	34	2610	2658	2555	2783	2614	2817
4.10_824.52				824.52	ESI (+)	4.099	10594	9786	7090	3813	8567	12862	3689	5178	5800	5361	5365	4365	2.28	2.28	2.28	2.28	2.28	2.28	56	37	23	2.28	29	2.28	4012	4663	4930	5312	5649	6810
4.13_597.49				597.487	ESI (+)	4.132	6202	6192	8901	5440	6889	10170	11817	12440	13718	15838	14569	13662	73	94	26	73	134	103	2.55	46	70	36	48	2.55	17549	17675	18138	18596	19383	21289
4.18_623.50				623.503	ESI (+)	4.18	15992	17830	15415	8778	13227	18941	21898	23296	27584	30916	30807	29306	29	49	62	57	97	2.93	2.93	99	41	69	2.93	73	20717	20477	21004	21294	22294	25344
4.19_850.54				850.535	ESI (+)	4.191	18278	16845	10452	4780	13396	23630	12338	20229	24391	23499	23113	19997	2.94	2.94	2.94	2.94	2.94	2.94	2.94	29	83	33	2.94	38	6236	7599	8628	9390	10145	11976
4.19_397.40				397.404	ESI (+)	4.194	1578	1803	1760	1261	1022	1432	5646	6255	7584	7024	9931	11723	49	82	58	33	59	98	50	65	82	122	2.86	29	4707	4651	5388	5065	5062	4620
4.29_728.52				728.522	ESI (+)	4.29	6439	7256	7313	3880	6321	9152	1745	2151	2472	2329	2736	2430	113	149	221	311	264	206	98	79	88	58	5.83	151	3439	3992	4019	4512	4470	4840
4.30_611.50				611.502	ESI (+)	4.3	1175	939	551	367	754	916	2177	2373	2844	3163	3064	2884	39	96	32	49	75	31	2.47	2.47	28	2.47	25	2.47	2883	3040	2860	3043	3100	3653
4.38_884.49				884.494	ESI (+)	4.383	2556	2508	1667	480	1660	2571	2909	3840	4165	3793	3636	3434	66	92	59	37	75	72	2.86	2.86	30	52	2.86	29	3172	3961	4052	4157	3435	5014
4.40_1608.10				1608.1	ESI (+)	4.397	1115	673	311	62	761	1190	570	2015	2353	2017	2356	1634	3.15	3.15	3.15	64	3.15	62	33	33	3.15	3.15	3.15	3.15	740	1609	2225	3196	3085	4673
4.40_611.50				611.505	ESI (+)	4.399	9625	10591	10870	6397	9583	13231	4038	4470	4710	4938	4618	4475	54	61	31	31	53	33	32	3.11	33	48	64	68	5146	5180	5787	5667	6204	6280
4.41_804.56				804.556	ESI (+)	4.41	293867	273588	162406	80258	205240	318466	267583	439126	495143	496087	451940	385733	2479	2522	2535	2691	2112	2274	695	800	972	667	755	697	351602	414956	468466	492375	535179	583115
4.43_413.40				413.398	ESI (+)	4.43	4037	5321	4251	2952	2710	3249	6473	6368	7701	7622	10657	10736	20.09	240	20.09	220	201	20.09	20.09	20.09	20.09	20.09	20.09	20.09	6956	6931	7149	6802	6624	6984
4.44_806.56				806.556	ESI (+)	4.443	14055	39986	24117	12472	30354	44839	38706	22847	73612	71602	64186	55218	2556	1802	1918	3044	2930	3368	146	161	182	30	111	83	51512	58814	67059	74161	25981	20580
4.50_447.35				447.348	ESI (+)	4.496	3731	5938	5545	4625	3964	3787	5138	4011	4861	5494	4294	4698	4214	4209	3393	3326	3334	2688	4288	4130	3714	3874	3368	2665	5126	4958	4898	4096	4097	3596
4.50_534.45				534.453	ESI (+)	4.502	3669	5616	5093	4924	3855	4247	4503	4213	5078	4962	4741	4925	3955	3929	3743	3178	3520	2917	3613	3679	3413	3280	2741	2326	5151	4758	4593	4295	4162	3361
4.50_724.49				724.492	ESI (+)	4.505	3743	4150	4751	2961	4443	6334	8142	9352	11673	12118	11579	9742	3.59	3.59	3.59	3.59	3.59	3.59	91	3.59	56	36	101	147	6418	6180	6599	6633	6796	8263
4.54_802.54				802.537	ESI (+)	4.54	5494	4910	4235	1891	4930	8046	2118	3369	3722	4065	4067	3288	3.41	3.41	3.41	3.41	3.41	3.41	71	120	34	40	67	3.41	3353	3747	3749	4337	4404	5204
4.54_637.52				637.521	ESI (+)	4.543	17150	18564	12107	7634	11379	16399	11749	13110	14596	16547	16210	13950	2.23	2.23	2.23	2.23	49	22	2.23	50	65	2.23	56	2.23	13324	13737	14343	14212	14877	16425
4.55_689.56				689.558	ESI (+)	4.554	2906	3568	2995	1669	2351	3995	4567	5213	6643	6941	7400	6860	372	320	414	635	624	1238	39	43	25	2.54	2.54	2.54	4951	5067	5426	5745	5669	5867
4.61_601.52				601.519	ESI (+)	4.605	2401	3741	2401	1087	1859	2943	2890	2997	4061	4956	5581	4908	2102	2049	2153	2224	2086	2270	3.03	90	30	3.03	50	3.03	3561	3477	3478	3865	3800	4141
4.61_829.56				829.557	ESI (+)	4.607	8092	4645	2810	1161	6342	8036	2906	7329	9068	4793	8314	4306	4.7	4.7	4.7	4.7	4.7	4.7	63	4.7	48	80	4.7	47	2227	2287	3139	6579	6904	7266
4.61_367.34				367.336	ESI (+)	4.61	10763	16878	9398	3046	7011	13360	8325	10815	11222	12550	19096	18624	75	3.21	3.21	35	38	3.21	42	3.21	3.21	3.21	3.21	3.21	2541	2270	2680	2502	2784	3199
4.64_796.55				796.553	ESI (+)	4.642	8209	6095	4348	2961	6112	10618	3566	5219	3768	7568	6471	5053	426	321	250	351	811	252	618	747	639	195	531	338	3074	3639	5277	5255	5462	4035
4.65_872.49				872.495	ESI (+)	4.652	3472	5620	6869	4901	7768	8801	5534	7344	8062	7351	7566	6771	2.53	2.53	48	2.53	2.53	2.53	25	41	66	37	48	45	4356	6147	6512	6569	6592	4032
4.66_738.51				738.505	ESI (+)	4.655	6493	3374	3777	2275	6600	9227	2993	3445	3615	4099	4091	3522	58	52	83	94	75	98	36	44	73	82	23	2.25	1950	3433	3556	3723	3743	4363
4.66_1584.10				1584.1	ESI (+)	4.66	17445	14382	13389	2822	15932	36368	4543	11026	12369	13523	12360	9007	34	29	28	28	2.33	28	30	23	30	2.33	2.33	2.33	5495	6718	8508	9449	11319	15232
4.67_742.54				742.539	ESI (+)	4.667	45212	43611	70216	30825	60438	87983	9586	8942	12686	16671	12350	11239	145	110	184	217	235	143	38	36	2.39	24	58	87	28111	26370	27281	29042	31276	39050
4.75_657.45				657.449	ESI (+)	4.75	1902	8362	7101	4380	6452	7097	1366	1592	2192	2216	2337	2647	2.3	2.3	2.3	2.3	2.3	2.3	2.3	47	23	34	48	35	3629	3493	3544	3399	3321	3033
4.76_764.52				764.523	ESI (+)	4.763	4615	6932	4852	2338	4434	6600	4074	4698	5433	6007	5676	5522	104	45	3.31	3.31	3.31	169	47	36	118	3.31	33	50	3627	4015	3927	4111	4301	4851
4.77_563.50				563.504	ESI (+)	4.768	1919	2244	4423	2612	3742	5328	580	636	896	866	736	710	38	56	2.75	41	2.75	2.75	29	28	2.75	2.75	2.75	2.75	4067	4181	4230	4305	4642	4678
4.78_771.56				771.559	ESI (+)	4.779	5288	6061	5496	2447	5051	7915	2185	2474	3168	3430	2954	2648	68	57	2.92	34	41	2.92	34	54	31	59	29	102	1710	3519	3356	3514	3799	4095
4.79_860.50				860.496	ESI (+)	4.791	1587	777	2063	932	1033	1878	2577	3119	3643	3491	3721	3780	390	581	548	446	610	642	52	2.31	2.31	23	40	33	3001	3135	3532	3393	3361	3525
4.80_783.56				783.562	ESI (+)	4.796	8588	7820	7304	3071	6240	9891	6488	8872	11325	10359	11854	12555	901	848	1641	1625	1441	1506	125	91	72	15	96	121	8588	10425	22453	11671	42955	16785
4.81_864.62				864.622	ESI (+)	4.809	5353	6624	5584	2904	4760	5539	6839	6917	7773	8967	8062	8311	56	1.13	195	65	11	85	75	76	1.13	74	46	76	5987	6651	6165	6307	6049	5655
4.81_688.49				688.49	ESI (+)	4.811	3625	3990	4876	2891	3893	5344	5969	6556	6819	7564	8363	7498	48	31	92	32	54	68	27	73	13	91	70	79	5303	5533	5737	6202	6029	6726
4.83_742.54				742.54	ESI (+)	4.826	8566	10148	10434	5765	9149	11514	1512	1419	1892	2237	1930	1695	91	46	149	102	3.33	33	53	44	69	93	50	69	3864	3363	3422	3036	3299	3637
4.84_886.51				886.511	ESI (+)	4.836	4550	5078	4819	2554	4403	5004	5989	7382	8316	8312	8690	8478	624	431	229	190	818	169	39	3.94	3.94	51	66	57	5063	5646	6079	6102	6329	5817
4.86_714.51				714.508	ESI (+)	4.862	2977	3258	3826	2433	3700	4799	3709	3684	4138	4766	5103	4607	124	47	3.4	94	151	67	3.4	56	34	51	40	39	3532	3357	3553	3588	3812	4169
4.88_597.49				597.487	ESI (+)	4.876	2524	215	4166	2194	3068	4381	3274	2902	3870	4779	3584	3569	51	40	2.7	59	34	42	51	2.7	29	41	63	27	1270	4554	4388	4846	4816	5252
4.88_778.54				778.538	ESI (+)	4.88	5476	5870	7079	3432	6118	8716	2727	3927	4217	4445	4379	3964	1420	1705	2114	2078	1952	2052	93	109	3.16	95	129	32	4061	5748	5781	5803	5855	7197
4.89_811.56				811.556	ESI (+)	4.895	7160	15202	12262	4919	4857	7941	1349	3329	2154	4	4	2268	4	4	104	4	977	524	40	55	4	4	4	4	6594	6230	7735	7345	8864	9531
4.90_790.54				790.537	ESI (+)	4.897	1452	1646	7948	3420	4996	8456	4155	4072	4413	6953	4570	4639	95	5.29	198	5.29	296	255	5.29	5.29	53	5.29	5.29	5.29	4998	3968	4896	2302	2275	1887
4.90_839.63				839.628	ESI (+)	4.903	2254	2536	3383	1938	2534	3190	2464	2327	2999	3175	2727	2341	104	138	66	154	438	235	3.67	87	59	51	37	110	3626	3549	3653	3609	3532	3915
4.91_757.56				757.56	ESI (+)	4.914	14387	27676	31166	13561	25205	28589	17393	20043	25534	18897	23907	14602	12601	12116	13751	13574	14896	17454	101	137	366	98	257	127	31951	21025	21919	23486	32215	28961
4.92_797.58				797.579	ESI (+)	4.915	8501	11711	10510	4331	9353	14221	5714	6696	8448	9209	8618	7570	207	171	205	159	4.9	74	55	81	49	82	4.9	109	6035	5546	5744	5796	6041	4098
4.93_683.46				683.464	ESI (+)	4.932	54300	1730	2358	36050	51131	62005	2270	61129	76761	2140	82312	90651	2.98	37	2.98	30	32	2.98	2.98	45	72	62	46	78	789	1730	62457	62614	57860	44839
4.94_705.52				705.52	ESI (+)	4.937	18256	37629	28263	24737	29349	30331	33247	33344	39750	36322	39942	44829	4.08	4.08	4.08	4.08	4.08	4.08	41	137	89	4.08	68	65	29773	31867	35220	33429	31077	15048
4.95_778.54				778.537	ESI (+)	4.951	3210	5308	6678	2606	4603	6274	3147	3637	4765	5053	4851	4786	5334	5820	5764	5917	4663	3817	6.58	114	107	66	81	6.58	5466	5686	5921	6234	6070	5635
4.96_832.59				832.587	ESI (+)	4.955	40062	118058	58115	27218	42947	68177	54311	49589	87214	96109	78872	77505	13083	13035	14077	12614	6664	6192	106	65	81	53	135	146	78531	79934	76434	70081	60841	41498
4.96_726.51				726.508	ESI (+)	4.956	8006	13513	16316	11437	12969	16294	16623	11769	19438	22975	16967	16921	4.31	4.31	4.31	4.31	4.31	4.31	43	194	186	146	137	126	16470	16080	14586	12972	11114	7210
4.96_792.55				792.554	ESI (+)	4.957	27062	49715	44787	22350	30228	40882	29479	25729	36086	43667	36621	36472	1786	1913	1352	2016	291	680	5.55	56	95	56	5.55	128	37152	32733	29698	27806	27454	27909
4.96_793.56				793.559	ESI (+)	4.964	14211	25695	22993	11057	15011	20445	15039	13163	17228	21565	18790	18540	3262	3548	3805	3711	1457	2991	85	31	82	3.1	39	145	18066	17122	15269	14272	13470	14059
4.96_639.53				639.535	ESI (+)	4.965	5251	16835	11046	7100	9149	12283	3496	3558	4189	4026	4206	4149	80	107	87	65	89	101	47	39	53	3.55	35	62	5381	5299	5573	5416	4955	2139
4.97_806.57				806.57	ESI (+)	4.966	86354	219837	159317	80332	87399	125613	173761	121327	195517	283118	203969	214243	44104	60207	75726	189722	1469143	1682651	5.67	98	303	57	112	105	184974	158707	138548	126462	111219	96560
4.97_359.26				359.259	ESI (+)	4.966	4594	8959	5376	3780	5941	7815	6144	6970	8230	7866	8682	9548	55	40	47	2.59	60	105	65	2.59	28	56	26	37	5954	6107	6553	6791	6437	3721
4.97_563.50				563.503	ESI (+)	4.969	6281	8233	8893	6464	9988	12344	363	551	590	585	685	744	1.44	69	195	79	102	14	71	48	66	104	54	41	2856	3095	3277	3702	3467	3146
4.97_577.52				577.52	ESI (+)	4.969	3958	7261	9890	6670	8889	10533	6415	7755	9445	9611	7768	22563	33001	34922	37441	36591	31120	14848	215	39	3.91	136	151	181	12408	12994	14139	14304	13835	8923
4.97_692.52				692.524	ESI (+)	4.971	8029	11160	8073	5817	8889	10089	4635	5132	5523	5152	5911	6589	3.12	107	63	3.12	65	91	38	53	3.12	64	31	34	5103	5282	5574	5699	5692	3755
4.97_782.57				782.571	ESI (+)	4.971	146514	196483	168874	76497	127248	182239	73185	136252	115442	129726	121248	109081	316592	272899	263014	224979	185701	185762	156	329	339	144	115	357	187398	157294	154734	163918	186608	253140
4.97_615.54				615.536	ESI (+)	4.975	6065	6243	3210	2376	5169	6638	2524	4463	3687	3518	3516	3003	158	48	4.79	4.79	4.79	4.79	4.79	128	4.79	76	61	76	4131	4262	4763	5749	6883	5772
4.98_783.58				783.575	ESI (+)	4.976	70398	93679	79301	36964	62137	87185	33888	65161	55248	61788	57995	51300	154827	134711	130106	110895	92223	89101	75	247	101	209	62	177	86807	80978	69941	77413	89018	119097
4.98_740.52				740.522	ESI (+)	4.976	23753	24970	13825	8694	12404	16390	10074	13461	13464	15265	14917	14763	7.98	7.98	7.98	7.98	7.98	7.98	7.98	158	87	80	183	209	33255	19171	19135	20327	23482	28694
4.99_603.53				603.534	ESI (+)	4.993	16951	9565	9918	6598	16876	21126	3725	8475	5228	5096	6463	5354	2856	3104	3967	5414	6795	12051	60	33	40	93	65	31	4662	4938	5675	8547	12547	19160
5.00_627.54				627.538	ESI (+)	5	25297	2192	1509	655	7274	11293	911	1602	1008	1109	1177	1107	50846	54053	83262	135505	197930	319605	55	25	2.49	59	2.49	32	980	1099	1195	1851	8833	22938
5.01_744.55				744.554	ESI (+)	5.015	164078	100295	163182	77607	203998	306610	54256	109559	106773	102219	109155	94750	58243	64482	73571	72159	60439	51611	7.33	110	73	94	88	150	91797	107762	127694	153086	179687	239135
5.02_828.55				828.553	ESI (+)	5.019	3621	6014	4239	1908	3210	5336	3642	4177	6400	7206	6212	5696	21570	31374	50751	55705	55253	51217	38	3.78	113	39	3.78	116	4517	4320	4282	3936	3578	4670
5.02_817.56				817.558	ESI (+)	5.022	8209	6023	5233	2344	5632	9663	4134	7877	8447	8270	9098	7705	159	255	531	313	223	445	34	0.73	7	45	0.73	0.73	4307	5521	6041	6608	7674	10132
5.03_795.57				795.574	ESI (+)	5.034	153407	82259	71571	32356	71424	118388	61046	73928	106017	112583	108161	94087	4470	4281	4956	4338	3937	3810	34	37	91	49	45	26	62944	67876	73931	76422	77278	79226
5.08_833.59				833.588	ESI (+)	5.083	3235	5957	3211	1446	2471	3596	3065	2844	4133	4870	4251	3544	6031	6341	8174	8152	9778	23705	41	3.58	53	36	52	98	3574	3971	3122	3222	2949	2953
5.09_817.56				817.558	ESI (+)	5.086	4986	6629	5428	2344	4601	8157	2567	3803	5392	5683	5585	4197	125	96	360	284	223	122	0.76	50	25	45	0.76	8	4307	3878	3856	4214	4091	4276
5.10_781.56				781.563	ESI (+)	5.104	1927	3081	2598	1277	1838	2894	2701	2999	3797	3918	4208	4026	799	836	789	891	866	828	77	3.35	50	37	47	34	3655	3997	3391	3621	3920	4486
5.12_831.57				831.571	ESI (+)	5.123	3565	6694	4688	1921	3320	8543	4817	6876	9250	9890	9510	8430	166	394	485	246	370	560	77	25	2.53	48	48	28	4366	4943	5414	5485	5491	6149
5.13_842.57				842.57	ESI (+)	5.13	5242	4753	3829	1383	3883	7102	652	2224	2247	2676	2388	1589	91	81	175	2.5	2.5	2.5	73	25	2.5	46	2.5	2.5	2155	3245	3556	3591	3545	4395
5.15_850.51				850.511	ESI (+)	5.15	2.88	2.88	282	810	497	1238	2583	3179	3728	3683	3330	2815	86	96	80	117	125	2.88	30	41	30	29	2.88	40	3423	3738	3798	3980	4036	3975
5.16_654.51				654.51	ESI (+)	5.159	3344	28963	16940	9228	6600	8138	10383	8866	11421	14156	12664	12967	105	3.15	48	40	3.15	46	67	3.15	45	40	32	60	13371	12349	12245	12502	12136	12592
5.16_659.47				659.468	ESI (+)	5.161	929	14654	4796	3274	2763	4058	6217	4652	5804	6333	6566	7014	43	2.98	2.98	2.98	2.98	2.98	37	30	2.98	58	33	45	6532	6276	6273	5874	5693	4805
5.19_766.54				766.539	ESI (+)	5.188	25864	35901	30359	14827	23466	33456	25288	24598	30003	31086	29535	30597	8.69	8.69	8.69	8.69	8.69	8.69	8.69	197	8.69	107	139	87	18657	18685	19013	17721	18086	17188
5.21_774.52				774.518	ESI (+)	5.205	7472	7423	6407	5118	7448	9123	1761	3415	5120	4828	4473	4784	4.57	140	185	4.57	147	4.57	51	63	51	46	4.57	119	4496	4337	3896	4074	4963	5998
5.22_752.52				752.523	ESI (+)	5.22	69438	79600	80425	44802	68076	100256	31612	34591	39435	44029	36380	32429	7.17	7.17	7.17	7.17	492	7.17	7.17	186	218	72	99	276	40632	40929	41021	43646	44852	48274
5.22_603.54				603.536	ESI (+)	5.225	8066	8109	7798	4107	7467	10726	1173	1439	1380	1674	1488	1482	750	1236	1152	854	827	371	36	3.58	50	47	108	3.58	2948	2980	2720	3242	3233	3482
5.24_732.55				732.555	ESI (+)	5.241	25250	30065	45724	24755	34251	47367	36233	40584	51061	62133	50490	51017	57897	34658	36005	32546	28399	29340	106	192	224	61	257	346	53874	52439	50578	51989	49002	53408
5.25_900.53				900.526	ESI (+)	5.253	5164	5301	4222	3105	4440	4730	3830	4590	4353	4347	4547	4335	140	13.45	202	308	271	13.45	201	321	284	226	13.45	135	3643	4045	3801	4127	4210	4436
5.26_1640.16				1640.16	ESI (+)	5.259	6393	9425	4048	905	4343	8634	2236	3906	4871	5038	5113	1975	4.25	96	4.25	4.25	80	79	43	4.25	4.25	4.25	82	118	2306	3078	2389	3476	3775	3200
5.26_778.54				778.538	ESI (+)	5.259	4130	5333	4673	2748	4162	5733	1299	2156	2382	1953	1807	1770	4.71	4.71	4.71	837	4.71	4.71	47	85	227	70	168	213	3188	2415	3252	2769	3241	3863
5.26_770.57				770.568	ESI (+)	5.264	67647	134677	111084	59215	83145	114879	99021	85493	116601	154348	100019	98616	3131	4088	4590	3996	3918	3533	519	466	742	375	836	722	165352	143580	138390	125750	119128	120366
5.27_742.57				742.569	ESI (+)	5.272	4318	2897	2626	4492	4239	1767	3216	3145	4386	3623	3857	4809	1601	2398	1512	2123	2488	2553	419	7.29	1283	7.29	150	721	1781	3346	2720	3963	3946	2887
5.28_728.52				728.523	ESI (+)	5.279	17228	19696	17464	10469	16585	22978	29418	33402	37989	40699	39140	35620	13.2	13.2	13.2	13.2	13.2	13.2	156	132	241	278	13.2	354	34319	35335	35840	37194	37809	41058
5.29_788.55				788.548	ESI (+)	5.285	9.55	9.55	9.55	9.55	9.55	9.55	4204	4261	5281	6208	5728	5039	270	322	246	299	349	96	334	500	308	9.55	129	136	1837	3750	2650	4728	9.55	5363
5.30_721.57				721.565	ESI (+)	5.298	30.95	30.95	522	30.95	30.95	30.95	8025	6000	11455	11599	10360	10069	30.95	30.95	30.95	30.95	30.95	30.95	30.95	30.95	30.95	30.95	30.95	30.95	4960	6679	6475	5788	5810	7998
5.32_796.59				796.587	ESI (+)	5.315	319794	365438	289784	146333	303086	435277	142713	186688	232586	246024	224702	202447	9.56	9.56	9.56	9.56	9.56	9.56	114	114	115	9.56	96	101	150485	158095	164143	172874	177037	192107
5.32_716.52				716.524	ESI (+)	5.322	7982	8853	13831	8245	12153	16057	6343	8299	9159	8675	11937	10069	6.03	97	6.03	142	80	118	101	85	74	6.03	60	6.03	8087	8146	9072	9481	9614	11231
5.34_720.57				720.574	ESI (+)	5.341	48.82	48.82	488	48.82	48.82	5299	9818	21848	16510	28040	23111	21730	3662	48.82	5138	4704	4529	5086	48.82	48.82	48.82	48.82	48.82	48.82	10178	10153	11687	10471	16109	15966
5.37_746.57				746.571	ESI (+)	5.365	7571	12524	8958	5097	7387	10568	41407	54417	72084	75985	70482	64041	206	765	769	725	596	1051	52	183	68	127	93	238	39106	41386	41977	44427	47116	49621
5.37_774.60				774.6	ESI (+)	5.369	24378	26853	30560	14797	28502	43109	183	3.91	3.91	3.91	3.91	147	249	250	294	144	211	209	51	42	39	56	46	138	3494	3510	3602	4026	4010	4557
5.37_823.60				823.601	ESI (+)	5.371	20424	24475	19022	9403	18577	26918	4532	5483	6876	8089	6265	5624	9.64	9.64	9.64	9.64	9.64	9.64	96	9.64	9.64	9.64	9.64	9.64	9500	8912	8894	9915	10245	11570
5.38_591.54				591.536	ESI (+)	5.375	13644	16113	16133	8961	15088	23182	1276	1665	2464	2330	2041	1878	5.58	5.58	82	5.58	81	60	56	5.58	5.58	5.58	5.58	5.58	7230	7616	7338	7503	8159	8862
5.38_685.48				685.481	ESI (+)	5.384	4444	5349	3051	3277	3276	2899	7883	5407	7859	8123	6590	7593	46	57	41	56	2.69	2.69	2.69	2.69	56	40	27	2.69	7736	6760	6578	6437	6374	4914
5.41_184.07				184.075	ESI (+)	5.408	4787	5266	5323	3096	4873	5877	2754	2843	3159	3848	3210	2936	3545	2647	3078	3444	3043	3331	964	528	522	649	700	872	3680	3827	3250	3921	3990	4680
5.41_717.58				717.579	ESI (+)	5.412	1676.81	1676.81	32223	17411	1676.81	32146	112402	117302	133705	145826	132747	115370	1676.81	1676.81	1676.81	1676.81	1676.81	1676.81	1676.81	1676.81	1676.81	1676.81	1676.81	1676.81	119297	128347	109881	130176	139525	149104
5.42_780.55				780.553	ESI (+)	5.419	73644	87578	121272	65953	115503	146178	25977	36008	45450	46243	48735	43784	41864	42120	43566	43347	40386	41631	141	136	87	41	139	4.08	57459	68405	71026	73015	74894	72956
5.42_1516.13				1516.13	ESI (+)	5.419	6687	7374	15492	4642	14921	31492	830	1658	1773	1663	2117	1871	3288	3373	2628	3143	3169	3073	52	42	49	61	4.18	4.18	3650	4073	4617	5493	5772	6300
5.42_617.55				617.546	ESI (+)	5.421	5945	6823	5799	3426	5987	8014	2205	2069	2624	3343	2882	2542	151	154	77	2.96	2.96	38	30	53	90	2.96	51	49	3301	3259	3168	3013	3472	3419
5.43_744.55				744.553	ESI (+)	5.427	9298	10011	16592	8920	13397	19834	5328	6055	7013	4624	8109	7295	6.98	6.98	6.98	6.98	295	264	70	96	105	89	95	75	7260	7368	7514	8420	8570	9624
5.48_732.55				732.555	ESI (+)	5.48	77632	89173	74175	40828	69344	101990	2954	3112	3802	4623	4215	4075	2305	2346	2183	2322	1364	2082	134	76	107	98	191	147	11402	11402	12032	11727	13227	14498
5.50_433.48				433.477	ESI (+)	5.501	11514	12782	9086	4882	9084	12770	2232	2448	2900	3137	3137	3072	2.48	2.48	2.48	2.48	2.48	2.48	39	2.48	27	25	2.48	2.48	4241	4621	4322	5018	5126	5687
5.52_853.64				853.64	ESI (+)	5.52	7935	9022	8284	5424	8127	9497	5430	6175	6980	7471	6745	6556	100	175	77	77	79	61	47	47	3.93	50	3.93	39	6405	6656	6910	6738	7364	7654
5.53_719.58				719.583	ESI (+)	5.529	2757	2563	7702	3991	6949	10339	4689	4952	4579	5250	4910	4309	728	48.87	672	489	1188	48.87	48.87	489	48.87	48.87	48.87	48.87	7160	6308	7432	6826	7329	6840
5.53_733.56				733.556	ESI (+)	5.529	13187	40338	33656	18409	10672	45314	879	995	1705	2130	1901	1865	1003	720	500	531	355	677	49	44	101	56	116	66	5627	3946	5439	5513	3418	3606
5.53_739.56				739.563	ESI (+)	5.531	9798	9407	8603	8227	7008	4725	6869	9201	9218	8280	8409	8760	1372	1168	851	2189	1237	1024	1738	1590	1833	1714	2101	3190	8250	8891	9353	8971	9640	9340
5.54_867.66				867.658	ESI (+)	5.535	6528	7637	6749	4509	6735	7616	4409	5029	5578	5929	5565	5471	311	466	146	228	190	300	44	56	34	3.44	77	59	5392	5697	5729	5700	5724	6042
5.54_1532.07				1532.07	ESI (+)	5.538	17118	19336	18361	6222	15986	30543	5711	8181	10073	11513	11086	7616	91	2.34	2.34	2.34	77	2.34	45	2.34	2.34	23	2.34	52	9600	10339	11062	12168	13003	14745
5.54_760.56				760.563	ESI (+)	5.538	5377	5.52	5.52	5739	6380	5.52	9467	4400	5839	5880	5317	6610	5.52	5.52	5.52	5.52	5.52	5.52	253	145	170	114	55	167	5.52	5.52	5711	3442	4097	7703
5.54_1482.05				1482.05	ESI (+)	5.545	4130	6233	8331	3201	7647	13489	3381	3539	5461	5928	6059	5083	3.81	3.81	3.81	3.81	38	3.81	3.81	51	3.81	50	3.81	50	5574	6274	6356	6446	6936	4885
5.55_769.55				769.555	ESI (+)	5.55	17804	23033	25371	13827	20676	28382	10485	12574	16239	16330	16909	15080	6.86	6.86	6.86	6.86	6.86	6.86	107	69	6.86	85	107	6.86	21653	23547	24367	24554	23631	20419
5.55_575.50				575.504	ESI (+)	5.551	2804	3635	5036	2665	3795	5726	3262	3483	3841	4268	3973	3890	49	57	2.87	80	63	64	32	38	2.87	29	35	29	4549	4244	4323	4131	4249	4704
5.55_1512.10				1512.1	ESI (+)	5.552	1066	2398	2695	896	2538	4746	377	767	1225	1118	1523	979	71	73	3.04	53	90	37	30	3.04	60	3.04	39	3.04	2540	2599	2938	2862	2897	2089
5.57_623.46				623.464	ESI (+)	5.574	2289	2442	2461	2241	2248	2506	7404	5482	6543	6322	6578	7585	38	57	38	32	75	70	3.21	39	34	3.21	3.21	3.21	4811	5025	4671	3958	4056	3572
5.58_605.55				605.551	ESI (+)	5.575	15763	19747	18802	9617	16753	24056	4966	4944	6215	7359	6524	6794	4659	4656	5294	5039	4599	5333	2.69	2.69	98	27	131	36	9974	9948	9759	9226	10014	10567
5.59_760.56				760.562	ESI (+)	5.592	5.33	5.33	5.33	2253	3058	5.33	8814	7361	5839	1763	5317	6205	5.33	5.33	5.33	5.33	5.33	5.33	253	154	53	91	55	167	5.33	5.33	3602	5.33	2383	5.33
5.60_742.54				742.54	ESI (+)	5.603	39106	45421	36320	19436	31704	44797	27707	30150	37078	40017	38237	34853	2.91	2.91	2.91	2.91	2.91	2.91	30	39	132	47	29	62	23558	23453	24574	25030	25849	27791
5.61_405.45				405.445	ESI (+)	5.605	10583	14263	10114	5164	8568	12365	1868	1818	2462	2813	2424	2796	2.74	2.74	2.74	2.74	43	2.74	31	2.74	27	2.74	2.74	32	5107	4715	5004	4606	4613	5230
5.62_483.48				483.477	ESI (+)	5.62	17915	25653	18006	9886	15606	22169	2271	2633	3913	3603	3409	4750	43	2.71	2.71	2.71	36	38	27	50	56	54	2.71	75	8621	8238	8422	8167	8495	8442
5.62_782.56				782.562	ESI (+)	5.624	3485	5269	3282	2329	2786	5875	2464	2963	3964	4313	4267	2586	9564	9458	14005	11159	11890	14946	37	104	111	3.74	74	54	3227	3952	3297	3714	3886	3044
5.63_1264.90				1264.9	ESI (+)	5.633	8734	53	66	327	7646	6160	60	10621	416	75	66	35	119	2.85	71	3424	4001	4133	2.85	29	41	260	512	561	192	231	608	11728	8693	8005
5.63_1221.82				1221.82	ESI (+)	5.634	19817	96	399	774	16791	15160	380	18110	626	311	452	790	138	304	47	7315	6456	6326	27	54	2.69	230	1278	857	245	466	1849	22351	17580	16383
5.64_764.53				764.526	ESI (+)	5.64	4498	4353	4364	2696	3835	5045	3201	3782	4367	4461	4618	3937	3.83	3.83	3.83	3.83	3.83	3.83	113	99	3.83	3.83	38	59	2867	3024	3053	3108	3406	3503
5.65_632.53				632.528	ESI (+)	5.654	4317	6642	4594	1649	4431	6289	1201	912	1522	1652	2143	1857	568	580	546	800	669	531	174	80	85	113	9	195	4834	4571	3854	3693	3486	3756
5.67_794.57				794.566	ESI (+)	5.673	34628	36696	43387	21777	35527	52068	23442	24571	33521	39147	33850	30843	3.61	3.61	3.61	3.61	3.61	3.61	321	140	207	37	36	73	31362	32497	32970	31576	33595	38621
5.68_768.55				768.554	ESI (+)	5.68	28986	38986	35339	21375	27820	35591	12486	9944	14857	20166	16794	17237	208.76	208.76	208.76	208.76	208.76	208.76	208.76	208.76	208.76	208.76	208.76	208.76	20575	17805	17524	16315	17432	15173
5.68_832.58				832.582	ESI (+)	5.685	9101	8643	7429	3867	7555	10590	6670	7179	8766	8799	9836	9302	5722	5807	6039	5849	4850	5610	86	42	65	91	122	173	4454	4811	5242	5301	5324	5359
5.70_781.61				781.613	ESI (+)	5.699	8474	11388	9910	6975	9484	10820	13946	11303	13434	14242	13682	13567	6173	6166	7237	6447	6146	5561	133.93	133.93	133.93	133.93	133.93	133.93	9741	10388	10003	9761	8676	6856
5.70_805.64				805.644	ESI (+)	5.701	4522	4100	5078	2688	4298	4641	1089	2557	2674	2175	2119	2820	4.08	4.08	4.08	4.08	4.08	4.08	4.08	41	45	126	71	41	4174	4671	4510	4411	4575	3989
5.70_1408.04				1408.04	ESI (+)	5.703	1461	1584	3380	1389	2645	4383	1085	1603	1658	1803	1810	1569	51	2.98	40	2.98	60	2.98	2.98	2.98	48	2.98	2.98	30	4237	4749	5081	5573	5916	6825
5.70_563.50				563.503	ESI (+)	5.704	5406	6652	8500	4758	6699	9301	4529	4956	5549	6252	5895	5799	66	62	4.29	52	54	4.29	61	85	65	92	43	4.29	10180	9417	9942	9823	10020	11258
5.71_784.59				784.586	ESI (+)	5.706	24147	33648	29299	16468	21860	26805	21876	21430	26517	31487	26302	25900	78412	71182	72276	68253	61902	72078	122	699	707	123	466	287	34583	29813	26890	27127	27902	32481
5.71_808.59				808.588	ESI (+)	5.707	23561	33391	20982	12439	16704	21193	19689	19006	22611	25160	23745	23957	9535	8219	9424	8538	7543	8987	102	169	257	194	112	184	20249	18459	17442	16685	17101	18888
5.71_758.57				758.57	ESI (+)	5.714	71802	82164	105900	63275	89729	109698	31187	35796	38055	44618	39869	38943	81035	79072	82739	78709	73935	89623	649	324	303	488	400	354	67948	62128	58986	59704	62564	76346
5.71_1545.12				1545.12	ESI (+)	5.714	5849	6235	6145	3454	4866	5749	3958	4807	5511	3924	5254	5002	479	228	259	485	611	923	11	1.11	51	1.11	78	49	4895	5130	5010	2877	5632	6581
5.72_1546.07				1546.07	ESI (+)	5.717	6026	2052	46.26	8804	3828	46.26	7411	9670	6098	1746	4314	7668	1560	3155	3277	3384	2598	3172	560	46.26	596	731	463	46.26	2246	5809	5459	8180	6086	3432
5.72_771.58				771.578	ESI (+)	5.719	5496	4505	4117	2189	4572	2674	3588	3978	4382	4917	3635	3459	8.82	8.82	8.82	8.82	8.82	8.82	248	107	196	204	229	88	5010	4786	4823	4942	5066	5772
5.72_522.60				522.598	ESI (+)	5.722	7222	6964	5156	6507	5734	4571	7460	4599	32942	6750	7017	5089	4962	3973	3386	3681	3685	6292	10902	4736	5066	6437	4288	6346	7108	6423	5871	5698	7084	8133
5.73_776.56				776.556	ESI (+)	5.729	21.64	21.64	21.64	21.64	21.64	21.64	3469	3883	3747	3261	4484	3153	1891	2011	1827	2031	1714	2019	355	21.64	549	379	216	919	2145	2777	4204	2746	3625	3231
5.74_774.56				774.561	ESI (+)	5.735	273.12	273.12	273.12	37732	273.12	273.12	23586	39543	273.12	273.12	8768	19908	273.12	3965	4252	273.12	273.12	273.12	273.12	273.12	273.12	273.12	273.12	273.12	273.12	11503	15533	31264	13019	273.12
5.74_773.56				773.564	ESI (+)	5.736	1067	1067	1067	20209	1067	1067	1067	1067	1067	1067	1067	1067	1067	1067	10670	11313	1067	1067	1067	1067	1067	1067	1067	1067	1067	1067	1067	1067	1067	1067
5.74_790.56				790.557	ESI (+)	5.742	13886	24.11	24.11	443	13593	1119	2835	4206	4158	6466	7885	7062	2828	4493	4487	4009	4205	4270	24.11	24.11	24.11	24.11	24.11	24.11	6750	7436	6722	8438	9110	9656
5.74_824.62				824.616	ESI (+)	5.744	28367	33865	19749	13187	20631	28256	15709	17887	20996	23205	19378	17888	819	789	1113	531	582	946	9.95	9.95	9.95	100	9.95	9.95	17962	18532	18381	18172	18480	19680
5.74_589.52				589.519	ESI (+)	5.744	4203	4741	5493	3438	4720	6655	2643	3105	3154	3751	4056	3548	6.08	130	81	61	192	70	106	86	71	245	221	125	3343	3219	3248	3413	3459	3720
5.75_756.55				756.552	ESI (+)	5.749	3873	4625	4074	1803	3467	4055	2105	2581	2656	2279	2875	2731	7834	8620	10059	9941	9431	9532	48	65	104	4.25	43	87	5146	5211	5210	4894	5328	6616
5.75_752.52				752.523	ESI (+)	5.755	9854	11890	14523	9644	12678	15051	8180	8481	9351	9790	11209	10270	8.06	8.06	8.06	8.06	8.06	8.06	128	8.06	8.06	8.06	8.06	81	8768	9179	9110	9115	9480	8828
5.76_605.55				605.552	ESI (+)	5.757	16080	19427	24395	13920	22085	30303	27713	32954	38299	42314	36459	33210	213	262	372	332	265	332	79	93	109	48	41	108	32105	33127	32635	34093	35519	38212
5.76_461.51				461.508	ESI (+)	5.758	13407	19587	14114	8499	11622	16896	4034	4250	4661	5242	4838	4418	3.24	3.24	3.24	3.24	3.24	3.24	33	32	3.24	44	3.24	3.24	6089	5788	6106	5614	6145	5601
5.76_748.59				748.586	ESI (+)	5.763	34984	39783	28635	17435	26559	35818	5.52	5.52	1156	5.52	1087	5.52	5.52	220	198	157	227	220	65	136	104	83	55	84	8685	7223	7356	9257	7551	11865
5.78_780.56				780.556	ESI (+)	5.776	9977	9812	9693	5541	9326	12856	6568	7759	8580	9333	9480	8372	6.48	6.48	6.48	6.48	6.48	6.48	6.48	85	6.48	68	6.48	65	9995	10281	10140	11094	12120	13164
5.78_820.58				820.584	ESI (+)	5.78	18987	20585	14456	8646	15691	21943	10251	14252	17218	16552	17225	14497	3.02	3.02	3.02	3.02	3.02	3.02	30	3.02	53	68	38	110	14201	16871	17551	19249	19671	21476
5.79_764.56				764.559	ESI (+)	5.788	3308	1985	2946	1414	1997	3954	3039	3493	3760	3917	4256	3910	7.76	7.76	7.76	7.76	7.76	7.76	130	118	112	78	138	94	2930	3201	3311	3603	3535	3880
5.79_771.57				771.57	ESI (+)	5.791	5548	5266	3912	2616	4572	5737	2352	2983	3196	3655	3405	3398	4.75	4.75	4.75	4.75	4.75	4.75	48	72	103	58	117	148	2648	2950	2964	3284	3403	3536
5.80_790.56				790.556	ESI (+)	5.798	13377	14471	12535	8259	13166	18281	8462	10343	11670	11332	12683	11610	14.55	14.55	14.55	14.55	14.55	14.55	14.55	14.55	14.55	14.55	146	14.55	7255	5402	8704	9146	9479	9656
5.80_791.56				791.561	ESI (+)	5.799	6852	5753	5381	3833	6888	9391	1829	1378	2431	3873	2642	2613	656	911	708	225	196	292	58	67	36	3.6	66	104	3011	3232	3784	3624	4015	4244
5.82_941.68				941.679	ESI (+)	5.817	6871	7737	4780	2653	4694	6651	3601	3948	4093	5113	5234	4457	126	70	128	92	89	108	63	42	4.2	95	72	85	8129	7295	7904	8514	8619	9535
5.82_663.50				663.497	ESI (+)	5.822	3292	4360	2946	1550	3707	4252	5133	3665	4896	5531	5869	6175	76	44	48	56	4.37	87	85	45	140	51	81	84	5561	5990	5551	5007	4890	4406
5.82_808.58				808.583	ESI (+)	5.822	17155	18678	16072	6848	15774	24171	12297	17989	21901	21971	25863	22435	9500	10451	12539	13655	12934	13253	51	74	165	65	63	68	12933	15326	16906	17552	17994	19624
5.83_786.60				786.603	ESI (+)	5.832	95367	111230	116857	51516	107875	173065	92582	135013	174370	182746	210064	175188	80134	96928	141454	136954	129758	137306	119	273	413	267	227	179	106572	118735	130819	137438	143509	153579
5.84_658.54				658.541	ESI (+)	5.839	11894	14864	8144	4510	8421	13391	10805	8558	11415	13172	13243	13955	4.75	4.75	112	72	73	106	4.75	80	48	146	52	58	12459	11936	11797	11582	10973	12371
5.84_773.57				773.573	ESI (+)	5.84	21794	24070	21584	14555	23399	33690	19675	21720	24745	30130	29560	26464	5631	4811	3568	3283	2458	3036	245.77	245.77	245.77	245.77	245.77	245.77	22650	23396	24358	26050	26433	27969
5.84_627.50				627.502	ESI (+)	5.843	4165	6252	4467	2579	4534	6533	3245	2950	2833	4430	4124	4170	70	56	3.12	3.12	34	81	49	31	39	59	3.12	3.12	3941	3826	3800	4014	3839	3971
5.84_649.48				649.48	ESI (+)	5.844	39243	53681	47037	34550	45286	60152	36353	26927	32870	38436	38498	41056	2.74	2.74	2.74	2.74	2.74	51	2.74	2.74	60	32	27	35	43410	43805	39391	38995	36171	32088
5.84_665.46				665.456	ESI (+)	5.845	7099	9069	8409	6858	7644	9257	7888	5815	6708	7346	6559	7652	1.4	1.4	37	1.4	36	1.4	1.4	1.4	14	1.4	30	38	7292	8353	7219	7162	6345	7254
5.85_714.51				714.505	ESI (+)	5.854	2738	3144	2137	1224	2132	1787	1383	1351	1520	1377	1423	1450	4.71	4.71	77	4.71	92	47	4.71	48	135	81	80	135	3677	3570	4053	4095	4096	4221
5.86_610.19				610.185	ESI (+)	5.864	31965	71177	10247	18006	18007	18176	46941	25936	23024	14441	19828	9635	5876	96328	5583	9861	8042	13188	34552	10696	15883	11715	57377	37159	8956	41319	8014	16998	39882	52580
5.87_746.58				746.581	ESI (+)	5.866	6397	8505	9391	2531	7198	10073	3626	4027	4727	5252	6204	7513	677	2.62	660	648	1332	1011	80	26	56	44	47	128	8869	9990	8716	8942	8028	4137
5.87_780.56				780.557	ESI (+)	5.868	17851	20413	16018	8670	13637	20628	7091	7933	8676	10081	9046	7769	2.41	2.41	2.41	2.41	2.41	2.41	53	24	54	87	86	2.41	9520	9302	9818	10247	10990	11525
5.91_746.57				746.568	ESI (+)	5.914	13071	15756	17210	9602	14653	20830	7028	7441	8833	9937	11753	10759	3.47	3.47	3.47	3.47	3.47	3.47	35	72	76	73	45	82	10874	10896	10564	11654	12356	13701
5.93_740.52				740.519	ESI (+)	5.927	9935	10551	13145	8635	11462	15192	13343	14678	16370	17424	18781	18212	4.9	4.9	115	4.9	4.9	4.9	4.9	96	49	4.9	4.9	4.9	14646	15524	16199	16155	16440	17215
5.93_577.52				577.517	ESI (+)	5.928	2770	3090	3470	2104	2962	3923	3785	4224	4603	4923	5209	5251	156	74	134	96	109	141	2.96	35	34	30	34	62	4103	4363	4276	4232	4248	4367
5.93_762.58				762.582	ESI (+)	5.93	7335	9025	10619	4.84	7587	12752	2116	1658	1579	1767	4.84	560	58797	28400	28453	23422	13700	24369	48	4.84	59	49	4.84	4.84	8991	4.84	4.84	1029	4.84	624
5.95_744.56				744.555	ESI (+)	5.95	76269	92424	99154	53032	84215	121076	34768	39441	44190	47379	63647	59450	13.6	13.6	13.6	13.6	13.6	13.6	13.6	136	331	192	155	164	42877	42660	42398	44898	46906	48890
5.96_846.60				846.604	ESI (+)	5.957	8345	9163	5451	2200	6779	11595	2962	5549	6660	6832	7490	5691	3.08	3.08	3.08	3.08	3.08	3.08	3.08	60	98	80	32	31	2867	3686	4083	4805	4931	5371
5.96_726.54				726.544	ESI (+)	5.964	13758	16167	10450	5828	10156	14147	3932	4297	5157	5366	6353	6129	1587	1442	1489	1342	1166	1090	43	48	88	59	39	3.88	7680	7647	7384	7800	7958	8925
5.99_684.56				684.556	ESI (+)	5.986	7957	9639	4487	2472	5625	8900	6675	5862	8192	9921	8636	9255	109	171	281	39	76	219	51	66	3.88	56	88	127	4436	3678	4076	4028	4568	4937
5.99_745.58				745.577	ESI (+)	5.993	14921	20067	13453	7086	10465	16711	5595	8944	5647	3942	44.2	4774	44.2	44.2	44.2	44.2	44.2	44.2	44.2	44.2	44.2	44.2	44.2	44.2	5917	5582	7781	7274	9033	8843
6.00_941.71				941.705	ESI (+)	5.996	4031	4254	3559	3508	3989	3767	2971	3552	3464	2957	3361	3213	1584	1780	1825	1841	1612	1978	485	536	725	755	258	710	3333	3458	3423	3539	3484	3533
6.00_746.58				746.581	ESI (+)	5.999	5373	9924	7823	3488	6324	8772	4065	6254	5355	5306	9081	4028	70.33	70.33	70.33	70.33	70.33	70.33	70.33	70.33	70.33	70.33	70.33	70.33	6039	4875	5869	7309	6385	7811
6.04_718.54				718.539	ESI (+)	6.035	40536	49300	57403	31520	48258	67747	25675	25408	28422	34020	30745	30497	1098.84	1098.84	1098.84	1098.84	1098.84	1098.84	1098.84	1098.84	1098.84	1098.84	1098.84	1098.84	33751	29932	29890	30733	32239	32421
6.04_610.63				610.625	ESI (+)	6.042	11206	9055	5967	5743	6652	9251	5604	5731	6143	6318	10179	5117	2895	2948	2741	2846	2876	2996	1861	2082	2005	2048	2122	2219	6717	6908	6669	7071	6952	7490
6.04_658.54				658.541	ESI (+)	6.045	38034	57823	38030	20556	32972	54004	36801	27408	41768	48489	51649	57150	392	456	270	124	207	59	45	140	49	73	57	98	43226	43762	41786	41023	38696	38739
6.05_595.59				595.592	ESI (+)	6.046	7840	7030	4141	4032	4802	6876	3396	3400	4153	4197	6022	3394	2267	2023	1917	1796	2035	2032	1082	991	1269	1346	1556	1751	4182	4332	4201	4040	4382	4817
6.05_685.55				685.552	ESI (+)	6.055	1975	6930	5396	2366	3645	3355	4145	3259	5033	6793	5588	7015	124	215	131	99	97	56	36	55	3.46	3.46	3.46	35	4699	5242	4644	4424	4028	3626
6.06_764.56				764.564	ESI (+)	6.056	1551	2421	2126	1491	642	2633	1384	1490	1996	2811	11272	2100	617	1038	18.24	324	556	428	1517	1057	483	393	389	926	4408	18383	4936	2211	1439	1626
6.07_807.66				807.659	ESI (+)	6.069	4622	6054	3148	904	2884	4103	3876	4311	4935	5409	5790	5068	2.75	127	2.75	147	2.75	2.75	69	2.75	79	27	51	182	8236	8239	8829	9096	9371	10155
6.07_748.58				748.583	ESI (+)	6.07	4466	6001	6500	3375	5265	8285	6975	7725	9650	11873	9446	8855	1774	1943	2035	1772	1895	1853	89	109	49	3.14	63	31	7130	6609	7288	7421	7549	9029
6.07_810.60				810.596	ESI (+)	6.074	6412	8394	6323	2626	5822	10449	3443	3935	4847	5777	5906	5210	37552	32673	32154	29260	25557	27787	30	119	113	64	2.95	2.95	3858	4107	4416	4646	4712	5198
6.08_728.56				728.557	ESI (+)	6.077	5225	6194	3617	1946	3101	4695	5631	5402	7307	7456	8607	7847	3.53	119	343	146	3.53	312	35	3.53	3.53	61	3.53	3.53	6031	6072	6352	6264	6261	6514
6.08_809.59				809.594	ESI (+)	6.085	11274	13414	12633	4623	12589	23074	4036	5432	7466	7630	8416	6646	11479	9957	9859	9328	9418	9394	57	4.7	47	4.7	47	66	6193	7172	7697	8843	9048	9327
6.09_786.60				786.603	ESI (+)	6.086	239794	306794	292432	124852	285231	483926	79516	101976	137007	148813	151095	126005	372230	281516	283026	264213	252045	245840	240	56	247	71	213	120	139538	153921	161678	169295	173209	183224
6.11_867.58				867.583	ESI (+)	6.105	2397	6032	4717	2640	4932	6990	1441	1636	1974	2157	1668	2349	3.25	3.25	3.25	3.25	3.25	3.25	116	33	40	55	59	3.25	3267	2142	4324	4145	4235	2591
6.13_748.57				748.571	ESI (+)	6.133	2692	1538	2686	2399	2853	1328	1939	2694	3631	3472	2580	2311	1215	1226	1557	1476	1340	1187	139	176	12.6	126	12.6	12.6	4388	4083	3287	2840	3654	5085
6.13_651.50				651.498	ESI (+)	6.135	6535	8129	6496	3662	7752	12184	5097	3942	5607	6216	7977	6881	102	3.37	117	3.37	3.37	3.37	3.37	37	3.37	3.37	60	34	4400	4608	4503	4375	4203	4268
6.14_766.82				766.821	ESI (+)	6.141	3797	6329	2193	2585	1978	4188	6667	3434	27.02	8434	612	5317	1603	2312	27.02	1861	270	1172	1958	2359	27.02	1667	27.02	2583	6339	3844	2365	335	27.02	3957
6.15_762.57				762.566	ESI (+)	6.147	5210	3603	4004	3802	5962	7413	1262	4985	5141	3660	3584	6229	71.88	71.88	71.88	71.88	71.88	71.88	1702	1276	1834	1592	1483	719	3985	2250	4110	4683	5045	5750
6.15_758.56				758.564	ESI (+)	6.15	4579	4557	5562	2753	3926	8886	1948	1157	2481	2879	2414	1997	9130	8008	7602	7702	7079	8574	411	361	156	15.64	249	317	3802	3200	2685	4340	3255	3148
6.16_1126.05				1126.05	ESI (+)	6.164	33888	31325	24981	18668	34260	41163	15634	24925	26082	23442	30419	27313	7579	9338	11848	12330	11308	12190	3515	5477	7111	8113	8205	9991	20263	22924	25864	28544	31861	35069
6.18_596.57				596.573	ESI (+)	6.176	21629	20886	18575	11904	23795	31792	10315	15279	16348	16157	21089	17731	9100	9246	12479	11482	10114	11147	4518	6120	6232	6315	6642	6460	14089	16094	17995	19848	20393	21434
6.18_762.58				762.576	ESI (+)	6.176	7073	6172	6441	4159	5962	7413	3381	2687	4735	6331	6484	6523	2005	3813	3443	3753	4114	4102	105	143	70	117	4.83	48	4458	4674	3885	4683	3212	1853
6.18_625.63				625.626	ESI (+)	6.181	4086	3970	3553	2454	4447	5438	2132	3234	3502	2998	4668	3413	1533	1519	1969	2031	1880	2215	649	1048	1058	1136	708	1359	2940	3308	3543	3915	4097	4799
6.19_706.54				706.538	ESI (+)	6.187	3582	4211	4429	2940	3477	4797	4438	4031	4974	5280	5368	4945	206	161	209	238	207	124	178	124	75	70	414	173	4371	4082	4384	4177	4188	4706
6.21_716.56				716.558	ESI (+)	6.206	2806	3345	1817	1211	1988	2854	2909	3009	3540	3496	3385	3618	69	55	112	118	76	139	65	5.48	79	95	80	157	2962	3037	3138	3304	3185	3471
6.23_766.55				766.552	ESI (+)	6.229	14777	12920	9542	6941	10396	13807	143.96	11050	12902	17011	9462	11718	143.96	143.96	143.96	143.96	143.96	143.96	143.96	143.96	143.96	143.96	143.96	143.96	13218	8729	11050	12018	11514	12900
6.24_754.56				754.563	ESI (+)	6.24	12938	10892	9755	6198	9497	12997	4040	14620	13559	4685	13343	13712	254	569	317	674	3683	4273	123	33	260	245	202	149	6358	8311	9632	10982	12067	11318
6.25_699.62				699.624	ESI (+)	6.246	6682	10261	9178	4695	7332	8939	3877	4305	5750	6417	5801	4790	57	3.79	38	3.79	47	3.79	70	105	3.79	3.79	47	73	5008	4931	4735	4754	5250	4954
6.25_646.54				646.541	ESI (+)	6.247	4047	6016	3692	2134	3565	5316	5075	3511	5698	6121	6765	7256	44	51	2.56	30	2.56	41	2.56	2.56	2.56	28	56	26	6191	6488	5925	5921	5794	5738
6.25_651.50				651.496	ESI (+)	6.247	3693	4182	2830	2076	2940	3745	4811	3935	5111	5486	6113	6793	2.58	32	2.58	2.58	51	2.58	47	40	33	47	35	26	6136	6459	5823	5769	5531	5435
6.25_685.61				685.609	ESI (+)	6.247	22316	31125	27512	12229	24701	36106	8660	13162	15924	15940	17126	14341	45	3.1	31	61	46	3.1	65	3.1	3.1	56	206	45	12523	14336	14722	15332	15140	14653
6.25_433.48				433.476	ESI (+)	6.249	8916	10582	8787	4241	8410	12529	3405	3954	4725	5460	4852	4276	35	2.73	2.73	2.73	2.73	2.73	2.73	31	2.73	2.73	2.73	27	4185	4369	4679	4881	4701	5258
6.25_728.67				728.671	ESI (+)	6.251	4616	3882	3868	2440	4436	5377	2090	3037	3340	3383	3101	3408	36	43	30	42	32	2.98	57	35	49	57	33	71	2888	3096	3121	3229	3573	3832
6.27_755.58				755.58	ESI (+)	6.271	3794	6569	4057	1776	2143	4844	11974	13900	15367	16442	16613	14895	366	1125	943	1125	580	891	94	51	72	153	87	123	6846	6640	6983	6939	7030	7376
6.28_753.56				753.564	ESI (+)	6.277	6915	8513	6079	3498	5321	7847	12066	13218	16343	19092	15558	14154	12813	13016	14500	13793	13612	13683	623	443	453	194	328	470	13187	13029	13640	13613	13918	14515
6.28_728.56				728.558	ESI (+)	6.281	5443	6527	4329	2628	4094	5911	2328	2085	2464	2972	3136	2908	240	196	79	138	108	567	62	76	5.37	67	5.37	54	3429	3368	3603	3357	3451	3712
6.30_766.57				766.569	ESI (+)	6.301	3951	5852	3434	3157	4008	4190	4395	4213	4366	4401	5074	4939	1457	1004	481	790	469	1891	557	691	46.88	487	906	983	4540	5890	4609	4004	5501	5162
6.36_759.64				759.637	ESI (+)	6.36	37306	52753	40536	16535	33891	76018	3480	243	4844	1218	5922	4498	42988	46617	51671	50668	46756	46664	60	34	35	35	131	114	13905	14201	15591	14665	14818	17747
6.37_811.63				811.629	ESI (+)	6.366	28913	32739	21848	9715	22184	32845	13292	18342	23432	24111	28517	25829	701	1239	1236	623	1307	614	4.38	68	44	4.38	161	46	16516	19796	21042	23559	24471	25800
6.37_744.57				744.566	ESI (+)	6.369	4899	6731	4776	2409	5484	6081	2724	3546	4383	5125	4927	3444	2.33	2.33	2.33	2.33	2.33	2.33	63	33	116	23	47	88	4268	3767	5907	1831	3475	4674
6.38_794.61				794.612	ESI (+)	6.378	31323	39652	29817	15365	27552	35206	868	572	1766	3.33	3669	3643	2807	2461	2744	2565	2566	2596	64	102	125	74	74	33	11459	12476	13384	13381	13909	13328
6.38_702.55				702.547	ESI (+)	6.38	7568	9508	7734	4464	6785	9970	1505	2026	2296	2425	2520	2743	523	268	455	308	356	98	56	87	59	46	77	4.63	3873	3873	3787	4114	3859	3960
6.38_483.48				483.478	ESI (+)	6.381	8185	10692	7105	3658	6369	9519	2106	2156	3210	2886	2874	4204	3.38	36	3.38	35	3.38	3.38	56	3.38	68	52	71	34	6683	6947	6952	7223	7309	7828
6.38_405.45				405.445	ESI (+)	6.381	3662	4465	3201	1585	3058	3760	1032	1021	1436	1202	1413	1665	2.4	2.4	2.4	2.4	2.4	2.4	2.4	33	24	2.4	2.4	2.4	3388	2732	3163	3006	3239	3604
6.38_591.53				591.534	ESI (+)	6.382	9072	10766	10894	5714	9717	12369	6056	6104	6786	8121	7491	7527	36	48	2.56	63	2.56	53	2.56	89	26	30	27	113	7228	7149	7145	7094	6784	7671
6.38_833.67				833.672	ESI (+)	6.382	5703	6918	6438	3626	5676	7736	3508	3930	3984	4532	4490	3951	2.38	2.38	2.38	2.38	2.38	2.38	2.38	29	2.38	29	24	74	4183	4467	4367	4302	4261	4121
6.38_713.61				713.605	ESI (+)	6.382	12847	17471	12074	6703	10418	12287	4330	4598	5977	5850	5551	7997	102	83	3.31	33	3.31	44	80	69	85	40	101	70	11956	12052	11803	11618	11956	12154
6.38_730.58				730.577	ESI (+)	6.384	7759	4893	3608	2505	3976	5703	3834	4208	7112	6093	8061	3040	142	74	416	379	740	983	53	4.83	87	48	56	127	5360	5975	6125	4363	11050	11088
6.39_755.54				755.544	ESI (+)	6.386	7039	6.4	10112	10318	7894	4656	10533	11374	10779	13823	14230	12360	6.4	6.4	6.4	6.4	6.4	6.4	66	73	67	64	98	75	11139	8444	12012	7278	9262	4948
6.39_776.56				776.556	ESI (+)	6.389	3.03	3.03	3.03	5190	1649	3.03	1968	3156	6477	9214	8270	7372	471	173	279	225	3.03	205	174	74	30	69	148	72	8347	4592	8406	6611	3567	3.03
6.41_754.57				754.574	ESI (+)	6.407	18449	27203	8.44	8.44	8.44	8.44	8.44	3668	8.44	1575	8.44	8.44	2752	2460	2721	2603	2653	2751	172	160	84	8.44	100	190	8.44	8.44	8.44	8.44	8.44	8.44
6.41_772.61				772.606	ESI (+)	6.41	5852	7268	6577	3308	3742	7174	5275	7292	9779	9977	11661	9839	968	3.82	3.82	3.82	3.82	3.82	103	85	38	3.82	3.82	83	7854	9034	8802	10032	10631	11285
6.41_780.55				780.554	ESI (+)	6.412	10292	11717	10503	6526	10027	12226	4759	4977	5574	6184	7094	6330	4.78	196	4.78	4.78	4.78	4.78	98	66	54	102	48	66	5724	5745	5912	5849	5995	6794
6.42_750.55				750.547	ESI (+)	6.424	15564	17828	14824	13709	13906	14336	18677	18932	20719	20770	20787	21039	186.87	2685	4851	6094	3074	186.87	186.87	186.87	186.87	186.87	1869	186.87	23036	23496	23421	23277	23100	23338
6.44_810.60				810.6	ESI (+)	6.437	6241	8450	6873	2750	6477	11899	2300	3464	4786	5166	5978	4932	7787	13497	15364	16037	13232	14382	56	56	45	34	8	52	2989	3786	4385	1514	4656	4727
6.44_684.20				684.204	ESI (+)	6.444	35359	125094	18667	33780	12690	18448	103298	19625	24067	25117	29404	13682	11754	208638	5905	7644	8270	18468	76749	17285	30789	14401	109517	41726	23065	63581	7209	12628	42243	53829
6.45_627.50				627.497	ESI (+)	6.446	3969	5909	4249	2868	4084	5665	6604	5061	7049	7784	7767	8627	39	45	47	3.89	3.89	49	48	52	62	57	53	70	11598	12247	11103	11140	10723	9375
6.46_489.54				489.54	ESI (+)	6.459	12725	19012	12362	5769	9801	15316	1046	1121	1737	2047	1471	1395	2.78	2.78	2.78	2.78	2.78	2.78	28	2.78	2.78	2.78	2.78	2.78	4375	3931	3814	3696	3856	3421
6.48_673.56				673.559	ESI (+)	6.483	23000	34729	18652	10141	17018	27613	11967	9264	13335	15267	16012	16275	2.6	2.6	42	34	2.6	2.6	69	89	42	85	26	66	17962	16704	16328	15193	15746	14338
6.49_693.49				693.485	ESI (+)	6.493	5918	6707	4772	4080	5009	6490	3870	3392	1386	3578	4439	2701	3.71	3.71	37	3.71	51	47	49	83	3.71	3.71	3.71	94	5630	4688	4636	4395	5139	5308
6.54_769.56				769.56	ESI (+)	6.537	11942	11235	14138	8407	12488	16553	3071	3160	3777	3688	5403	5310	2.98	2.98	2.98	2.98	106	2.98	30	64	68	40	66	2.98	2871	4184	4352	4379	4831	4046
6.54_752.56				752.557	ESI (+)	6.542	5141	5756	4443	3063	3951	4816	13954	15823	17722	18353	19258	17602	1711	1755	2018	1959	860	1256	573	917	889	1116	1222	419	14006	15108	14827	15941	15655	16201
6.59_605.55				605.549	ESI (+)	6.587	6419	8197	7279	4252	6573	8345	2691	2353	2854	3497	3751	3653	167	102	127	54	0.76	65	35	40	31	8	68	36	3381	2998	3069	3107	3123	3491
6.59_815.64				815.638	ESI (+)	6.587	12329	17524	12640	5317	11223	18996	2924	3329	4367	4844	4658	4427	6282	6320	7353	7290	6204	6769	128	39	106	35	51	101	6143	6403	6710	7071	7114	7926
6.59_773.65				773.653	ESI (+)	6.591	49624	74854	45533	19860	37899	70383	59985	70195	100223	100199	129339	127156	2.6	2.6	2.6	111	112	161	2.6	110	127	26	2.6	75	58553	62211	63713	64110	66697	67492
6.60_716.56				716.56	ESI (+)	6.598	10255	13374	10501	5973	8463	12904	4104	4566	4874	5309	5411	5070	140	148	215	141	37	216	3.74	3.74	3.74	125	61	3.74	6089	6190	5767	6505	6304	6620
6.60_653.52				653.52	ESI (+)	6.603	7273	11474	7601	4909	8226	10540	4408	3383	4508	4925	5830	5735	50	56	38	3.18	55	54	37	36	32	3.18	67	3.18	4925	5005	5081	4761	4734	4361
6.63_696.65				696.653	ESI (+)	6.627	8917	7461	6601	11006	7526	10203	4466	16224	5906	4815	5294	5328	2301	5238	2672	3102	2037	4019	2579	4016	2308	2967	5248	6889	6423	7800	7843	7011	7391	10349
6.66_687.57				687.566	ESI (+)	6.661	4708	7792	5214	2668	4758	7535	2097	2283	2563	2800	3480	3258	36	205	246	163	71	141	3.55	45	85	3.55	72	58	3444	3401	3539	3735	3447	3529
6.67_730.58				730.576	ESI (+)	6.667	9783	13370	7528	4258	7067	10217	13714	10809	15568	16780	16939	15050	78	252	188	164	233	202	38	57	127	3.83	68	226	15608	13423	13318	12980	12918	13329
6.69_665.51				665.512	ESI (+)	6.686	44657	67023	47048	27640	47017	65737	18151	15580	20243	22087	25295	26999	108	100	5.51	5.51	137	174	75	94	55	59	135	83	29763	31000	32257	30352	28921	27191
6.69_681.48				681.484	ESI (+)	6.688	8677	10407	8692	5799	8434	9602	4147	3867	4616	4722	5787	5909	117	65	89	3.53	44	68	75	35	3.53	62	45	41	5903	6155	6440	6112	5699	6167
6.76_638.66				638.655	ESI (+)	6.76	11428	10085	6526	5922	7120	10270	5418	5590	6322	6049	10599	5543	1931	1910	1696	2011	2026	2054	2063	2000	2243	2285	2122	2352	6793	6954	7227	7450	7632	7470
6.76_623.62				623.618	ESI (+)	6.761	6955	7192	4261	3390	4596	6570	3600	3354	3905	4065	6484	3746	1222	1073	1278	1368	1168	1287	1105	1310	1329	1342	1427	1697	4742	4806	4405	4438	4306	4792
6.76_575.52				575.518	ESI (+)	6.762	3871	5000	3789	2336	3424	5248	1469	1605	2005	2322	2279	2613	38	3.08	50	35	53	48	41	31	56	3.08	41	86	3096	3426	3327	3614	3399	3920
6.77_610.56				610.56	ESI (+)	6.766	9188	11600	2005	7309	9777	8050	3440	2599	4677	5242	6298	3427	55.97	55.97	55.97	55.97	55.97	55.97	55.97	55.97	55.97	55.97	55.97	55.97	3905	9069	7814	9435	7623	8092
6.79_679.53				679.528	ESI (+)	6.789	7231	8568	4502	2818	6087	9052	3451	3184	3577	4287	4868	5003	43	33	2.79	91	2.79	2.79	2.79	47	28	80	2.79	44	3425	3836	3711	3783	3923	3582
6.85_740.56				740.558	ESI (+)	6.85	7502	8214	6098	3941	6375	8207	10138	11106	13176	13001	13717	12465	3.05	91	199	31	31	151	42	3.05	54	169	95	97	9893	11304	11165	11252	11356	11676
6.87_773.62				773.622	ESI (+)	6.871	7838	10610	6695	3976	5911	8978	3220	3674	4928	5201	6432	4097	5.47	5.47	5.47	5.47	5.47	5.47	59	81	55	57	61	5.47	5552	4692	4396	4128	5463	5621
6.87_772.60				772.6	ESI (+)	6.873	17388	22257	15019	8027	14456	20498	6251	6627	7846	8785	9455	8560	3.63	3.63	3.63	3.63	3.63	3.63	93	64	110	36	120	137	9737	10333	9929	10114	9894	10545
6.91_814.63				814.63	ESI (+)	6.909	11807	17628	10553	4607	8384	14950	3710	3682	5266	6036	5999	5546	3.22	529	3.22	3.22	3.22	3.22	88	32	34	3.22	104	50	7175	6858	6357	6660	6912	7197
6.92_603.50				603.497	ESI (+)	6.917	1175	873	2533	1611	1951	2782	1479	1242	1685	1798	1733	1899	67	2.93	2.93	2.93	2.93	37	69	76	71	2.93	29	47	4561	4510	4829	4130	4099	3625
6.92_713.64				713.639	ESI (+)	6.921	5379	10805	8286	3812	6741	10774	5364	7309	10282	10496	11464	10271	3.33	3.33	3.33	3.33	33	38	3.33	38	37	70	44	97	5894	6866	7677	7163	7079	5082
6.92_691.59				691.585	ESI (+)	6.923	7345	10518	9307	4459	7838	10961	5936	7306	10392	11003	11279	9973	31	3.07	45	62	42	84	39	3.07	40	52	3.07	3.07	6942	7890	7325	8120	7217	6917
6.93_752.56				752.557	ESI (+)	6.932	36341	40562	32213	20665	31487	41832	25455	27321	32458	32686	38918	37067	726	1176	872	749	330	776	631	657	947	803	598	580	30387	32670	34041	34063	34409	35364
6.94_589.55				589.554	ESI (+)	6.94	4234	5447	3796	2444	3667	5167	2855	3031	3736	4022	4160	4509	18	119	54	99	107	1.85	97	46	55	27	83	48	3633	3637	3866	3772	3679	3787
6.95_822.64				822.641	ESI (+)	6.947	11105	19074	11382	4760	8295	13251	4468	4473	6980	7467	7149	6494	645	698	721	418	401	237	41	70	29	46	38	53	7545	8037	8080	7489	7464	7508
7.02_854.67				854.671	ESI (+)	7.016	7673	8306	5001	2845	4883	7720	1931	2376	2942	3046	3671	3253	170	304	45	158	138	119	99	113	3.76	57	45	38	4369	4784	5273	5675	5875	6033
7.04_591.57				591.57	ESI (+)	7.044	1888	2906	1769	952	1528	1810	4499	4308	5480	6155	6875	6053	55	188	4.23	99	43	56	147	66	77	183	42	69	4068	3710	3680	3730	3685	3920
7.04_782.57				782.573	ESI (+)	7.045	7847	2921	7997	3966	7664	6913	5068	5937	6831	6998	6580	6031	299	422	406	336	283	335	58	46	96	43	43	51	5812	6312	6374	6479	6460	6933
7.05_778.57				778.573	ESI (+)	7.046	1784	1726	1205	713	1048	1590	2182	2287	2641	2615	2789	2770	1.23	137	144	92	12	79	141	1.23	148	137	73	166	2928	3107	3165	2974	3487	3458
7.05_839.66				839.659	ESI (+)	7.048	3515	3853	2348	1430	2555	4020	5416	7133	10253	11063	13840	11153	341	26	334	0.82	222	0.82	88	59	88	8	28	0.82	3970	4767	5203	5701	6248	6375
7.05_754.57				754.572	ESI (+)	7.048	11149	12350	8212	5553	8368	10686	22874	24758	28508	29480	32992	31012	4.2	209	174	4.2	4.2	128	42	119	209	119	78	189	17857	19288	19970	20139	20503	21157
7.06_741.64				741.636	ESI (+)	7.061	7546	9710	5626	2299	5561	9695	1722	2371	2809	3160	2743	3216	93	44	2.93	62	2.93	87	29	2.93	40	56	53	2.93	4426	4325	4842	5416	5644	5701
7.09_790.63				790.63	ESI (+)	7.088	5236	6718	5106	3024	4657	6979	4048	4111	5637	5882	6118	5517	4.22	4.22	4.22	4.22	4.22	4.22	42	103	63	356	4.22	55	4350	4747	4795	4840	4856	4785
7.09_777.56				777.563	ESI (+)	7.089	294	1521	1627	1122	1791	1785	4261	4213	5207	4730	4889	4635	2.89	86	53	58	2.89	2.89	52	119	54	66	52	29	3300	3599	3607	3356	3037	2388
7.11_655.53				655.528	ESI (+)	7.109	2317	3492	1785	1229	1687	2454	1968	1545	1946	2524	2895	2669	36	2.8	36	44	44	2.8	43	77	2.8	2.8	28	47	3559	3463	3788	3616	3652	3273
7.13_718.58				718.575	ESI (+)	7.134	2187	2708	1841	1220	1485	1670	2958	2895	3681	4090	4255	4435	204	292	198	198	214	184	32	140	185	189	133	131	3836	3782	4035	3854	3780	4063
7.16_758.61				758.607	ESI (+)	7.157	3081	3857	876	626	951	1824	5851	5923	7019	7632	8414	7762	6.87	6.87	6.87	6.87	6.87	6.87	158	106	102	78	69	6.87	10048	10044	10479	10228	10674	10892
7.27_880.72				880.719	ESI (+)	7.267	6003	10664	12506	3673	4197	11928	3253	3741	2546	4279	3929	7085	134	63	46	68	148	114	33	71	148	212	157	106	6102	5553	4538	4355	4264	3969
7.36_746.60				746.604	ESI (+)	7.364	6123	8734	4603	2869	4438	6136	5950	5699	6380	6940	7518	6670	155	54	227	165	227	197	35	55	3.47	3.47	106	88	6213	6398	6440	6990	6357	6786
7.38_831.70				831.696	ESI (+)	7.383	3568	4593	3288	1844	2884	4410	3487	3639	4876	4958	5098	4719	120	87	62	232	67	148	31	47	3.1	49	45	48	3338	3564	3341	3408	3645	3337
7.39_774.60				774.605	ESI (+)	7.391	6256	7980	6548	3679	5691	7316	3131	3316	4244	4607	4046	3523	66	48	71	67	62	103	111	34	28	111	44	65	4803	4982	5001	5233	5025	5367
7.47_590.59				590.588	ESI (+)	7.466	956	1098	851	542	492	976	4680	5432	6339	7585	4694	4191	3.04	53	30	69	3.04	81	3.04	48	73	77	129	54	6047	5706	5916	5931	6436	6725
7.49_670.63				670.634	ESI (+)	7.494	220	193	173	141	172	112	1556	1509	1962	2392	1673	1591	170	34	122	77	15	1.46	64	1.46	80	60	81	15	4336	4332	4237	4224	4440	4669
7.71_634.61				634.614	ESI (+)	7.708	269	626	369	209	322	228	2036	2401	3414	4014	2695	2203	66	83	511	129	52	49	87	3.23	50	110	32	3.23	3194	3122	3185	3201	3298	3091
7.85_647.46				647.46	ESI (+)	7.848	9722	91700	120983	94993	76039	87254	81459	82232	128135	78214	104095	133505	8951	8460	5917	5478	5854	731	70651	26384	39178	29762	25165	1826	137120	131748	127152	124574	119615	7096
7.86_749.55				749.549	ESI (+)	7.862	7585	10015	7382	4362	5551	7710	1524	1410	1651	1836	3534	4004	121	2.95	34	133	58	30	49	119	97	73	2.95	53	3862	4045	3842	3920	4136	3520
7.94_808.63				808.625	ESI (+)	7.94	31748	38055	15702	11268	18676	26107	12266	13924	18739	17869	22580	18042	193	108	110	4.67	88	75	118	95	123	4.67	123	47	15390	15121	15735	16683	17361	18565
8.05_778.61				778.612	ESI (+)	8.051	5241	5817	5179	1964	2502	7795	1232	2335	1759	1529	3171	3625	129	61	105	118	142	56	65	43	97	54	95	59	1602	2554	2488	1383	2654	2169
8.35_607.57				607.567	ESI (+)	8.349	24660	31519	780	3657	6311	13594	1878	846	659	677	18047	1089	689	594	679	515	424	757	950	456	659	678	1351	1116	5370	5414	5352	5150	5267	5287
8.38_607.57				607.567	ESI (+)	8.377	24660	31519	780	3657	6311	13594	1878	846	659	677	18047	1089	689	594	679	515	424	757	950	456	659	678	1351	1116	5370	5414	5352	5150	5267	5287
8.78_795.63				795.629	ESI (+)	8.778	136437	191053	151764	77672	119848	184529	43168	40563	55062	67527	57320	60705	268	212	367	387	399	367	50	4.9	4.9	89	49	57	76516	73317	71300	71496	70338	72557
8.91_676.66				676.661	ESI (+)	8.91	160	216	165	251	216	153	3686	3723	4505	4908	4286	4072	36	49	53	2.03	52	2.03	49	2.03	37	65	59	50	4658	4705	4333	4285	4366	4827
8.91_659.63				659.634	ESI (+)	8.91	235	262	222	225	177	272	4259	4066	5061	5790	4357	3731	46	35	3.03	3.03	45	3.03	30	3.03	31	3.03	3.03	56	5110	4917	4502	4518	4943	4900
8.99_762.66				762.661	ESI (+)	8.988	1030	1260	1573	846	921	1252	2729	2715	3908	4273	3333	3400	176	345	191	159	156	395	60	4.85	49	60	52	125	5561	5595	5084	5039	5144	5412
9.04_649.52				649.519	ESI (+)	9.037	3681	5045	3283	1910	3139	4630	3483	4005	5054	5484	5985	5306	108	93	83	122	49	220	39	64	3.9	3.9	56	81	3608	3823	3706	3818	4012	3889
9.11_649.61				649.612	ESI (+)	9.112	876	927	1829	1108	1368	1932	3839	3490	4584	5516	4782	4210	31	52	26	80	34	112	73	2.65	40	2.65	82	64	3531	3707	3304	3456	3334	2879
9.19_697.61				697.611	ESI (+)	9.192	187	808	351	325	256	593	3191	3192	3688	3742	3836	2866	3.56	37	49	55	39	90	3.56	54	3.56	61	36	79	4053	4182	3936	3994	3748	4086
9.19_675.63				675.628	ESI (+)	9.193	1131	1736	1287	629	725	968	6440	5932	6580	8335	6969	5998	56	37	3.71	3.71	53	94	58	72	47	94	85	39	8299	8274	7379	7977	7779	8254
9.23_647.63				647.634	ESI (+)	9.231	1772	2375	2858	1705	2078	2698	8918	8671	10455	12076	11174	9418	31	2.75	62	48	92	44	37	44	42	2.75	28	46	7908	8059	7842	7629	7550	8357
9.34_866.72				866.725	ESI (+)	9.343	2089	2881	3020	1445	1591	2415	7768	7454	8104	9309	11014	10378	1054	996	991	906	904	470	42	34	3.36	3.36	3.36	48	4381	4437	4202	4286	4071	4295
9.36_661.65				661.65	ESI (+)	9.36	1259	1350	1946	1037	1079	1718	9400	9230	10652	12283	12651	10606	2.76	28	29	69	2.76	41	31	2.76	65	70	118	92	6931	7099	7209	7053	7150	6650
9.37_781.64				781.637	ESI (+)	9.365	1777	2522	1491	814	1232	1394	1628	1766	2307	2439	2109	1856	95	103	117	90	115	22	34	2.16	47	51	31	55	3544	3578	3387	3308	3426	3327
9.51_685.61				685.608	ESI (+)	9.507	4772	5860	5292	2996	3694	5623	6105	6773	7425	7530	8136	6934	109	34	47	58	3.4	88	3.4	40	60	42	60	79	7797	8294	8115	7635	7804	8016
9.51_663.63				663.627	ESI (+)	9.507	12393	17105	14873	8415	9210	14325	19144	18614	21261	24388	23408	20279	125	71	131	33	84	80	3.33	81	94	59	83	129	22492	22473	21383	21142	21185	22623
9.51_892.74				892.741	ESI (+)	9.51	3061	4001	3890	2155	2622	4210	5669	5974	5525	6760	7296	6727	338	1313	490	1358	1439	1683	57	34	40	32	3.17	61	3298	3229	3491	3405	3158	3255
9.56_885.70				885.697	ESI (+)	9.557	1376	1991	1906	756	1244	2065	4674	4627	5742	6026	6397	6000	2.96	2.96	74	2.96	2.96	67	2.96	41	34	30	66	2.96	3113	3073	3255	2936	3040	2928
9.62_944.77				944.772	ESI (+)	9.618	4421	5147	3662	2065	2753	4673	10941	9689	12433	13725	15786	14560	67	195	133	989	1116	3684	30	27	20	63	29	32	4769	4435	4293	4227	4550	4416
9.63_842.73				842.726	ESI (+)	9.629	2332	2784	4314	2521	2331	3361	13886	12943	16781	18264	19255	18239	2593	2446	2516	2320	2098	2514	2.79	60	28	2.79	32	44	7265	6872	6780	6821	6525	6461
9.63_699.63				699.626	ESI (+)	9.63	2463	2808	2466	1729	1928	2615	4506	5215	5482	6055	6583	5647	36	51	70	31	70	104	56	46	42	56	3.13	3.13	4543	4515	4532	4707	4546	4583
9.63_677.65				677.645	ESI (+)	9.632	5977	7585	7183	4084	4746	6439	13284	13180	15392	17581	18435	15954	105	98	37	41	3.19	54	64	115	38	3.19	34	32	12891	12019	12139	12159	11911	11680
9.63_651.63				651.629	ESI (+)	9.634	975	1831	1884	1174	1052	1780	2989	2803	3634	3814	3595	3260	81	65	3.28	40	68	3.28	35	60	50	33	3.28	142	5175	5278	4836	4965	4818	4540
9.68_880.74				880.74	ESI (+)	9.682	8283	10906	12846	6826	8028	12443	34842	33405	37823	43851	52012	46845	136	278	86	218	220	2.82	94	61	37	28	35	38	15670	15156	15012	14550	15246	15201
9.75_675.67				675.665	ESI (+)	9.752	1929	2440	2443	1500	1787	2690	7620	7395	8366	10707	9756	8957	3.31	41	3.31	44	73	47	46	73	48	3.31	52	33	7096	6387	6184	6304	6013	6362
9.80_874.70				874.697	ESI (+)	9.801	1520	1134	986	438	1016	2736	15388	15433	17191	16800	20748	20349	206	139	280	47	102	67	2.65	36	27	40	2.65	38	2221	3655	4169	4776	6347	6637
9.83_873.69				873.694	ESI (+)	9.83	6704	9042	8446	5239	5880	8243	25957	25055	30773	31286	34237	33316	552	192	134	3.61	139	42	84	49	3.61	42	44	36	12614	12739	13031	12726	12036	11165
9.87_870.75				870.749	ESI (+)	9.867	4980	6542	5900	3544	4161	5657	17645	15833	21184	22020	23883	22305	12318	10382	11978	16578	19559	25773	61	123	190	160	82	86	8535	8520	7523	8147	7757	7709
9.93_849.70				849.697	ESI (+)	9.932	217	690	1187	711	705	1466	5544	5873	6598	6751	8002	7711	11401	11313	6996	6382	5087	4366	36	42	36	32	30	33	3516	3794	3921	3493	3920	3550
9.97_832.74				832.74	ESI (+)	9.97	720	773	1039	526	439	837	13035	11723	14908	16239	19102	17448	523	517	198	165	537	559	54	60	28	72	25	2.49	7566	7401	6890	6952	7289	7075
9.97_910.77				910.77	ESI (+)	9.972	1646	1764	1873	1141	1103	1702	6828	6496	8078	8797	9718	8416	566	552	910	737	310	626	3.71	59	37	90	3.71	3.71	3640	3400	3540	3475	3429	3561
10.01_806.73				806.727	ESI (+)	10.006	4815	4509	5028	3562	4878	6259	10433	13469	13603	12493	15867	18306	1531	1576	1587	1658	1276	1512	116	283	274	221	250	243	7161	6521	7144	6739	6968	7312
10.01_713.64				713.645	ESI (+)	10.01	3795	4931	3211	1946	2735	3444	3287	3001	2952	3800	3974	3451	93	30	68	3.03	77	3.03	3.03	45	71	51	50	38	3699	3823	3602	4014	3721	3268
10.01_691.66				691.661	ESI (+)	10.011	11484	15300	9728	5552	6820	9817	10841	10469	11939	14139	14669	12584	2.79	28	35	72	45	31	57	54	33	50	48	34	11749	11082	10931	11328	11123	11478
10.02_899.71				899.711	ESI (+)	10.023	18056	22819	18450	11609	15338	22194	44296	46199	50739	52118	60313	53419	861.11	861.11	861.11	861.11	861.11	861.11	861.11	861.11	861.11	861.11	861.11	861.11	22513	23151	23076	23379	23385	23830
10.04_870.75				870.755	ESI (+)	10.044	3731	4843	6840	4079	3931	5316	40528	39438	46060	52113	59012	52871	49338	48118	52944	47608	41728	36738	41	150	118	4.11	59	52	15617	16034	15558	15517	14729	15185
10.05_875.71				875.714	ESI (+)	10.047	1182	1233	1478	1355	1472	1638	11796	11279	13641	14174	15953	14147	14510	14054	15588	15188	12307	10653	60	28	53	30	74	31	4587	4898	4780	4702	4761	4314
10.05_785.66				785.663	ESI (+)	10.048	2311	3064	2599	1895	1967	2583	4202	3979	4038	4382	5589	4885	57	73	127	104	58	172	31	79	62	78	184	130	3544	3759	3756	4002	3748	3754
10.09_946.79				946.787	ESI (+)	10.086	4184	5368	3169	2015	2788	4672	10315	9440	11681	13311	14494	13604	7130	6171	7378	6854	6314	6464	2.94	50	29	2.94	2.94	51	3463	3367	3160	3183	3043	3354
10.09_811.68				811.68	ESI (+)	10.094	4969	6488	6769	4299	4830	6661	27118	25623	30316	33651	34220	31821	100	101	226	169	213	130	53	55	96	63	83	177	17219	17961	17301	17502	16935	16142
10.10_876.79				876.791	ESI (+)	10.095	3082	3680	2095	836	2714	2119	11439	12121	15026	14946	14932	13819	0.86	0.86	0.86	0.86	0.86	0.86	61	44	0.86	9	26	50	6660	7511	7570	6135	7827	6680
10.11_849.70				849.7	ESI (+)	10.106	3042	7718	7816	4468	3091	6859	6673	2791	4945	7800	6252	5054	2438	2370	2548	2646	2531	2461	32	51	94	65	54	3.22	4462	4528	4357	4265	3864	2787
10.11_844.74				844.741	ESI (+)	10.111	8824	28555	24616	9704	9476	13539	19128	14915	21108	24923	27884	21911	6959	6368	7507	7143	6511	6498	3.06	31	3.06	72	73	37	14251	14579	14564	12567	12248	10822
10.12_858.75				858.753	ESI (+)	10.122	9400	4067	15113	3172	9342	6634	89125	83994	100066	110455	137017	124562	7301	7100	7204	7060	6760	6785	66	42	38	42	102	44	46611	45760	43584	44391	44569	44646
10.13_902.81				902.813	ESI (+)	10.126	3.26	3.26	3.26	566	3.26	3.26	9214	8989	10002	9907	12797	11459	3.26	3.26	3.26	3.26	3.26	3.26	3.26	3.26	3.26	37	33	65	5785	5622	5901	5617	5884	5474
10.13_887.71				887.713	ESI (+)	10.135	5550	7028	8618	5389	5953	8487	31533	30672	35226	37424	41910	39272	2.57	2.57	2.57	2.57	2.57	2.57	2.57	74	2.57	2.57	26	2.57	18777	18730	18607	18602	18276	18287
10.13_952.83				952.832	ESI (+)	10.135	1196	1012	1704	1003	923	1900	6351	6801	7669	7861	8990	8529	3.04	3.04	3.04	3.04	3.04	1398	3.04	53	3.04	3.04	33	30	3477	3478	3583	3473	3579	3557
10.16_875.71				875.715	ESI (+)	10.156	7775	10186	7876	4689	6104	8552	14448	16026	16079	17977	18930	18243	5631	5932	7756	5865	6660	5972	34	43	3.37	62	3.37	38	10132	10412	10197	9652	9913	8835
10.16_928.83				928.83	ESI (+)	10.162	1108	852	1109	704	700	1416	6106	6708	7282	7892	9385	8185	302	318	970	297	3.08	3.08	3.08	46	34	31	3.08	61	3691	4029	3931	3726	4162	3914
10.19_876.73				876.731	ESI (+)	10.187	901	3354	3995	2151	1926	1895	4042	3698	18371	19293	19180	18664	1069	1282	781	539	1379	781	28	47	38	2.85	45	29	4794	4449	5395	5475	6442	7318
10.20_913.74				913.738	ESI (+)	10.2	416	5603	5304	687	705	1158	2487	6901	11759	8192	28803	14589	256	274	119	3.18	119	97	3.18	32	3.18	3.18	3.18	3.18	2534	7798	3017	4278	5885	2901
10.23_966.85				966.847	ESI (+)	10.228	2132	2739	2209	1460	1760	2727	7516	7516	9078	8791	10633	9992	6093	5828	7457	7159	6686	5669	61	81	4.61	46	4.61	57	3387	3460	3482	3469	3410	2856
10.23_954.85				954.847	ESI (+)	10.234	580	709	942	529	827	1239	4813	5376	5679	5268	7191	6912	24	2.39	165	104	264	2.39	2.39	2.39	77	33	2.39	2.39	3485	3788	4105	3854	4066	3985
10.23_889.73				889.728	ESI (+)	10.235	2640	2464	3999	1021	2125	2621	13949	16230	18415	15495	23068	20575	3.38	70	194	3.38	3.38	3.38	47	34	48	3.38	67	45	13210	13338	13549	13676	12600	13134
10.24_884.77				884.772	ESI (+)	10.236	11129	15514	14331	8372	9193	14199	68626	64093	74702	82287	102200	91558	2746	3010	2347	2335	1343	1645	48	47	2.7	35	27	64	48060	47913	46859	46074	46667	47404
10.24_890.78				890.782	ESI (+)	10.239	9641	13442	27122	14074	13334	17681	3377	3.95	6217	6344	8463	6664	3.95	3.95	3.95	3.95	3.95	3.95	40	3.95	52	43	68	84	7393	8683	10886	10497	10584	10651
10.30_889.74				889.739	ESI (+)	10.296	3293	4870	4308	2900	3535	4339	21489	18231	21890	23369	29946	22752	2.99	2.99	2.99	2.99	2.99	2.99	2.99	2.99	30	2.99	2.99	2.99	9486	9530	9226	10021	10430	7994
10.30_917.82				917.823	ESI (+)	10.299	864	86.42	86.42	86.42	86.42	86.42	4821	8696	9834	6772	9067	9134	3304	86.42	6790	86.42	2635	2197	1897	1580	1473	1223	1644	1709	5792	6404	6399	6773	7082	6715
10.30_863.71				863.714	ESI (+)	10.3	1827	4110	3776	2945	2525	4569	13537	12699	13998	14556	15403	14853	2.8	2.8	2.8	2.8	2.8	122	36	2.8	28	61	39	56	7612	7479	6725	6752	6793	6426
10.30_888.80				888.797	ESI (+)	10.303	1412	2617	1914	1237	1233	2022	5462	5472	6203	6647	6715	5987	4455	4190	4598	4260	3734	3977	2.99	2.99	30	44	2.99	30	4566	4657	4791	4895	4662	4776
10.30_902.78				902.785	ESI (+)	10.304	1956	3328	3402	1574	1370	3795	8139	8377	10002	18084	17488	16806	3299	3153	3617	1422	2796	3.02	94	43	35	30	75	91	3592	6178	5377	5966	3095	2542
10.31_837.70				837.697	ESI (+)	10.311	12942	18259	12486	7739	9196	12716	31159	30134	33691	37700	29927	28516	2.91	93	151	2.91	2.91	2.91	29	65	42	2.91	37	45	35114	35401	35523	34123	34321	33717
10.31_902.80				902.801	ESI (+)	10.313	3118	7074	4652	3261	4744	5098	10640	14995	16441	13784	7995	7867	7738	8157	4884	8192	7308	7859	2.53	2.53	35	44	25	37	15128	15183	15863	15576	16334	14241
10.32_885.77				885.774	ESI (+)	10.316	6675	9161	11701	6991	7024	10489	70950	67724	77631	88097	101624	90830	2819	2805	3133	3272	3026	2937	3.18	81	111	3.18	32	69	25170	24705	24593	23896	23411	24226
10.33_916.81				916.814	ESI (+)	10.327	1884	1007	1885	3210	3004	3611	5316	6136	9297	6140	4035	7050	5.55	5.55	5.55	5.55	5.55	1641	94	75	55	92	106	236	3265	3580	3590	4013	5618	6236
10.33_922.79				922.788	ESI (+)	10.328	6980	8826	6306	3692	4444	7252	28058	27530	33783	38950	38603	35667	16896	16045	18190	17464	19186	27367	531	3.09	439	3.09	277	31	14484	14048	14276	13808	13430	14424
10.33_927.75				927.747	ESI (+)	10.329	1968	2512	2172	1282	1202	2620	7598	7245	8686	8837	9377	8806	215	552	1434	211	1.71	1.71	1.71	27	1.71	1.71	17	91	3816	4158	4500	3433	4235	4233
10.35_872.77				872.773	ESI (+)	10.352	4542	5679	7683	4389	4425	5555	55772	53258	66365	67836	79280	79216	1311159	1290386	1431692	1396069	1276295	1342294	251	218	208	222	206	489	41742	40428	39485	39001	37864	37930
10.39_839.71				839.709	ESI (+)	10.391	435	1072	1067	996	684	916	13542	12849	14338	15347	16953	16372	1433	1324	1583	1873	1733	1507	92	38	65	3.83	42	207	9992	9792	9828	9744	9473	9272
10.39_885.77				885.775	ESI (+)	10.393	6760	9568	11701	6991	6323	9319	46926	41144	53287	62038	67741	58929	2819	2805	3133	3272	3026	2937	31	81	41	60	3.14	3.14	18543	18890	17746	17604	16416	16010
10.40_877.74				877.741	ESI (+)	10.398	1046	1507	2479	1798	2087	2798	12094	16879	16905	19869	20976	18247	4.73	4.73	4.73	4.73	4.73	4.73	4.73	53	4.73	4.73	47	67	9901	9985	7879	9438	9258	8150
10.40_535.47				535.471	ESI (+)	10.401	1324	1958	1407	1102	933	1386	7101	6613	7801	8756	8900	7793	264	276	552	160	262	207	161	100	122	180	90	228	4308	4258	3996	3981	4017	4120
10.40_876.80				876.795	ESI (+)	10.403	1544	2305	1621	1000	1067	1605	7299	7285	7828	8884	9381	7900	736	844	443	625	658	692	1.33	13	1.33	49	31	64	5660	5233	5492	5403	5392	5071
10.41_813.70				813.697	ESI (+)	10.41	878	874	1319	1005	891	1055	8167	6931	7726	9648	8299	6019	1124	1213	1145	1254	1146	725	176	143	90	95	209	186	4156	4853	4416	3462	3999	2968
10.41_575.51				575.505	ESI (+)	10.411	785	1181	1142	757	582	1065	7526	7560	8757	10426	11162	9195	1403	1230	1273	995	613	516	2.83	35	29	2.83	37	28	3593	3797	3863	3744	3374	3875
10.42_889.74				889.74	ESI (+)	10.416	2650	4469	4165	1170	3403	4491	12105	10783	12775	14914	15828	17317	2.63	2.63	2.63	2.63	2.63	246	2.63	33	26	2.63	2.63	2.63	7179	6752	6104	5159	5911	5290
10.42_561.49				561.49	ESI (+)	10.419	839	1095	1230	762	871	1193	10718	10057	11030	13524	14535	12775	50	131	2.78	41	94	113	2.78	46	58	2.78	28	58	4273	4223	4421	4264	3816	4472
10.42_916.84				916.835	ESI (+)	10.423	5179	6543	8078	5459	5389	7260	41577	46099	49317	49679	57436	51379	1147	3615	3206	3162	2896	2071	45	2.99	2.99	30	46	39	21300	21817	23024	23003	22889	22180
10.42_909.67				909.67	ESI (+)	10.423	2.81	2.81	2.81	245	2.81	2.81	6669	6725	6831	7023	8088	7429	403	334	371	317	463	455	43	28	78	2.81	2.81	62	4148	4235	2899	4082	4157	3987
10.42_888.80				888.797	ESI (+)	10.424	1588	2109	2473	1522	1397	1918	10390	10141	12003	12572	12943	12180	837	755	546	1027	605	938	29	33	37	38	25	53	6553	6931	6361	6200	6350	6132
10.44_925.80				925.802	ESI (+)	10.435	2258	3532	2331	1216	2161	3417	17594	15993	19422	21410	27347	24941	10792	10134	11404	10706	9577	8415	84	39	42	46	45	54	6866	7042	6799	6766	6687	6553
10.44_874.77				874.774	ESI (+)	10.443	9833	13569	10259	5785	6477	9494	80179	74992	86140	97033	114086	103188	17644	16652	18498	16068	14783	11310	45	75	61	63	72	124	47068	46453	44921	44918	44870	44513
10.46_949.80				949.801	ESI (+)	10.462	1892	2228	3.06	198	473	1359	9349	9641	11142	12000	13765	11988	3671	2145	3703	3349	2101	1962	3.06	3.06	31	3.06	58	36	3370	3269	3431	3077	3125	3087
10.47_827.71				827.713	ESI (+)	10.467	211	140	194	1389	184	449	7055	6849	8649	9189	8760	8543	4.45	63	76	136	101	45	58	87	4.45	66	74	149	4453	4555	5818	4000	4088	3708
10.48_956.86				956.862	ESI (+)	10.477	1038	873	459	583	863	1063	3744	5772	4933	4198	6084	5394	1233	1051	1521	1117	1338	1370	28	2.83	2.83	32	2.83	2.83	2492	3475	3475	3761	4213	3044
10.48_900.79				900.792	ESI (+)	10.478	2506	3216	3203	2019	2027	3157	20371	18667	22945	25276	28574	27096	10336	9373	10964	9678	7408	5795	29	34	32	40	31	2.94	9975	9962	9844	9973	9673	9133
10.48_893.71				893.705	ESI (+)	10.479	2252	2265	3.71	322	1128	944	8315	7854	8566	8948	9728	9005	1587	1105	1719	1917	733	705	3.71	49	42	37	3.71	38	6472	6240	5768	6611	6106	8412
10.48_903.75				903.753	ESI (+)	10.479	1842	3750	2920	1236	1378	2392	13440	12599	14381	15487	16713	16606	5357	5104	9444	5204	6505	4703	33	46	31	3.05	3.05	94	6026	6607	6097	6519	5997	5694
10.48_942.85				942.847	ESI (+)	10.48	3577	4753	3640	2218	2855	3688	17567	18266	20403	20090	24394	22372	3087	2691	3420	3176	2332	1728	49	69	2.54	25	2.54	30	12031	12301	13099	13029	13515	12849
10.48_914.81				914.813	ESI (+)	10.481	953	1502	1021	555	836	1171	4920	4926	5690	6256	6134	6129	730	938	1080	655	365	879	52	2.78	2.78	2.78	2.78	28	3752	3793	3630	3838	3412	3828
10.50_860.77				860.772	ESI (+)	10.503	14000	15552	26386	21082	21319	22700	512616	284009	295891	292937	718045	650347	28101	27535	29748	28049	25985	25758	42	164	324	43	98	86	100579	90583	94824	102237	90760	115044
10.50_813.69				813.695	ESI (+)	10.504	4224	5479	6487	4369	4077	5709	14902	14716	14847	15633	16550	16772	100	203	245	170	164	307	69	96	142	119	183	324	15501	15829	15347	15073	15270	14853
10.51_850.78				850.783	ESI (+)	10.507	650	842	951	537	374	777	4689	4133	4366	5797	5835	4987	162	158	59	115	113	98	29	28	44	64	61	91	4411	3917	3713	3354	4908	3940
10.51_865.73				865.728	ESI (+)	10.512	4596	5044	10222	6148	6570	8529	40442	42946	43587	43012	67459	66338	8479	8331	9557	8924	8375	7961	69	70	97	31	75	105	23806	22208	22425	24222	22334	24890
10.53_877.75				877.75	ESI (+)	10.525	5554	12603	7732	6115	6645	10568	9195	3846	7917	4519	7198	7072	2.53	2.53	2.53	2.53	2.53	2.53	2.53	2.53	2.53	25	106	2.53	2930	3373	6143	2922	5272	2528
10.54_897.67				897.67	ESI (+)	10.54	2.74	329	2.74	2.74	2.74	2.74	9261	9199	10111	10548	10101	9869	214	75	51	70	119	149	62	31	34	51	89	27	6226	6715	6526	6771	6550	6358
10.54_904.83				904.832	ESI (+)	10.541	3085	1015	7399	4861	4233	6607	83848	88540	100431	98168	108752	98688	3.3	3.3	3.3	3.3	3.3	3.3	36	128	111	33	3.3	195	43539	45378	44783	44738	45468	45748
10.54_1656.43				1656.43	ESI (+)	10.541	55	50	2.97	70	55	132	11234	12477	14483	14713	14354	13314	2.97	39	2.97	2.97	2.97	2.97	30	2.97	2.97	2.97	31	59	5600	6163	6126	6599	6663	6345
10.54_931.85				931.851	ESI (+)	10.542	3.36	3.36	1704	368	3.36	2051	14645	14177	16086	14964	19865	18324	3.36	542	659	1558	3.36	421	46	34	50	79	3.36	73	9894	9517	9582	9764	9892	9698
10.54_918.85				918.848	ESI (+)	10.545	893	449	3.19	3.19	811	2252	11310	16648	15094	12449	16776	14536	75	372	186	192	202	74	64	63	85	32	63	61	6611	8674	9259	11103	11659	12097
10.55_549.49				549.488	ESI (+)	10.546	421	685	890	514	459	635	22759	21048	26920	31912	29463	25939	43	152	106	108	137	278	96	38	46	71	78	32	10019	9476	9807	9320	9393	9692
10.55_890.81				890.814	ESI (+)	10.546	1372	2317	9541	1829	6761	2361	17624	18897	20482	21534	23116	20447	369	194	619	420	597	237	3.08	3.08	31	3.08	47	41	10029	10740	10988	11034	11337	10942
10.55_575.50				575.503	ESI (+)	10.551	578	583	635	445	294	470	12758	12297	14683	17547	17159	14866	298	124	250	285	177	60	0.87	9	0.87	101	31	27	5593	5264	5647	5124	5142	5371
10.57_968.86				968.864	ESI (+)	10.572	1775	2710	1960	1174	1618	2107	8127	8423	8896	8479	9415	9270	9640	9550	10298	10563	9858	9102	4.3	4.3	4.3	4.3	4.3	43	3750	3572	3473	3547	3761	3491
10.57_930.85				930.849	ESI (+)	10.575	799	4.15	4.15	2152	3457	2403	21445	21114	24145	22886	30392	27548	4.15	4.15	4.15	4.15	4.15	4.15	50	121	41	69	77	138	14264	14810	14888	14792	14927	14280
10.58_956.86				956.863	ESI (+)	10.58	1849	2120	2179	1238	1057	1885	12371	13421	15307	14245	18442	17549	3284	3382	4046	3822	3570	3195	2.62	2.62	2.62	50	32	26	9478	9979	10024	9815	10016	9746
10.58_886.79				886.788	ESI (+)	10.58	17502	23698	22500	12531	12871	18926	305634	301930	353279	384831	497982	449214	23459	22637	24825	23451	21256	21259	60	45	216	36	45	3.56	183295	182550	178780	179911	183082	191579
10.58_980.86				980.863	ESI (+)	10.58	2086	2654	2270	1398	1841	2942	5560	6105	7062	6583	8379	7265	1009	1157	1217	1179	1031	1102	54	62	2.69	27	94	43	3035	3134	3159	3229	3107	3224
10.58_865.73				865.727	ESI (+)	10.581	6084	8495	10220	6367	6712	9307	58141	53530	58691	60481	67459	66338	720	1109	1666	1103	971	646	4.66	47	144	89	93	55	45362	45014	44226	43553	44415	42699
10.59_891.74				891.745	ESI (+)	10.588	1900	768	2.54	2.54	2.54	2.54	45901	43556	48377	50672	58827	55422	5778	5324	3257	2900	2033	917	47	57	79	31	25	48	37361	37442	37451	36182	36496	36577
10.59_937.81				937.805	ESI (+)	10.589	8224	10766	7773	4348	5282	8549	36960	38772	44334	48836	63690	57109	348	335	363	163	409	496	56	51	2.8	35	37	28	15566	15229	14949	15107	15376	15659
10.59_905.82				905.825	ESI (+)	10.593	593	2.81	1413	851	1067	1642	16542	19717	30356	31668	30862	8366	2.81	2516	2564	3492	4143	3675	28	45	2.81	2.81	44	2.81	13311	6479	10888	10508	5309	12986
10.59_867.75				867.745	ESI (+)	10.594	886	1444	2568	1063	935	2326	8007	8015	5300	7639	7769	7564	3.07	3.07	3.07	3.07	3.07	3.07	40	38	31	3.07	3.07	3.07	4165	5216	5042	5554	7642	5444
10.63_864.80				864.795	ESI (+)	10.634	1463	1812	2203	1013	1372	1937	6724	6204	6276	7180	7513	7469	3603	3427	3099	3379	2918	2970	2.79	28	39	55	40	55	3642	3910	3618	3763	3124	3312
10.63_906.84				906.844	ESI (+)	10.634	754	345	3.13	483	479	1192	5145	7967	7695	5762	7897	7359	2523	2934	3090	2619	2675	2748	40	62	49	61	31	149	2209	3321	3950	3851	4136	4927
10.65_878.81				878.813	ESI (+)	10.649	666	545	721	548	515	564	7320	7830	8259	9103	9425	9328	5395	5147	7376	6071	7161	6202	6.43	6.43	76	64	94	73	3829	4269	3950	3624	4224	4150
10.66_563.50				563.505	ESI (+)	10.656	276	285	415	289	268	283	7642	7222	8235	10022	10467	10075	39	118	96	62	72	114	56	2.73	38	27	34	53	2946	2980	2981	2845	2731	2875
10.66_918.85				918.851	ESI (+)	10.664	3.31	3.31	3.31	3.31	3.31	3.31	41930	41749	46799	47043	58161	53155	55459	55155	60258	57721	53616	45494	33	78	66	3.31	84	155	20300	21143	21635	20221	21416	19639
10.67_862.78				862.782	ESI (+)	10.668	12083	21901	25052	6259	16040	17478	113864	100686	72220	130322	109718	97557	4192	3996	4235	4001	3571	4440	38	104	226	75	55	62	92614	65422	62677	71660	71607	35503
10.67_891.75				891.751	ESI (+)	10.672	4204	5741	5901	3548	4115	5540	22249	19864	21652	23281	24789	23110	3.18	3.18	3.18	3.18	3.18	3.18	66	3.18	32	51	81	35	10668	11503	10944	11179	10532	9074
10.69_905.78				905.779	ESI (+)	10.687	545	3.05	1250	599	575	457	6080	6462	6492	5360	9023	5765	5469	7353	9876	8456	9545	8924	3.05	93	56	77	51	31	7121	7467	7177	6085	7239	6916
10.72_822.76				822.756	ESI (+)	10.72	8680	12010	17044	8019	9235	14617	68948	63813	94639	84587	93189	87928	14653	14972	13895	14210	11487	8647	788	1245	520	848	163	1450	36749	39726	39158	36532	35362	32304
10.72_944.87				944.865	ESI (+)	10.724	15460	10129	10081	8125	12964	16026	23834	33036	31095	26803	33484	31834	141992	140995	156279	143770	136877	129593	53	5.32	88	59	103	5.32	19615	23157	27381	27554	30965	30946
10.73_575.51				575.505	ESI (+)	10.726	23199	35180	26451	12076	16882	27515	108193	103510	114060	134834	116287	108664	24864	23200	25503	24264	21211	23349	36	29	146	51	63	34	81572	77358	77348	76824	77842	79853
10.73_863.02				863.023	ESI (+)	10.729	3.03	4529	5346	163	3.03	6247	60343	56565	68081	79374	74212	62434	156	321	3.03	66	76	66	32	47	3.03	30	3.03	3.03	25698	43751	44844	42755	45530	44685
10.73_916.83				916.831	ESI (+)	10.73	14059	16226	13807	8258	11768	15215	32543	35855	37569	39804	38433	35549	19913	18559	19700	18831	17770	17451	55	119	1.36	14	48	57	26849	27165	27676	28408	28761	28123
10.73_863.19				863.187	ESI (+)	10.73	4.69	763	2240	232	223	4.69	15386	11213	9698	19690	10787	17403	129	47	4.69	98	113	206	4.69	4.69	4.69	4.69	4.69	4.69	6497	14616	12746	3862	11284	11211
10.73_923.69				923.687	ESI (+)	10.731	10040	11863	10327	7058	9180	11199	14732	14433	14445	15768	14331	14863	2.84	2.84	2.84	2.84	2.84	2.84	92	82	187	99	28	113	14151	14283	14492	14525	14244	13377
10.74_924.79				924.785	ESI (+)	10.743	2917	13427	10691	6263	4788	2664	4.76	4.76	4.76	4.76	4.76	4.76	1280	1737	537	1461	640	1332	4.76	48	4.76	78	126	126	12247	14101	13880	8761	10821	10020
10.76_1426.39				1426.39	ESI (+)	10.759	1409	18148	992	3596	435	665	17493	1158	1182	1518	3763	1202	923	31437	399	470	176	1461	12196	1094	2005	939	17434	3046	2448	5186	417	620	1337	1779
10.77_836.77				836.773	ESI (+)	10.768	3669	4984	10857	6219	4274	6267	343549	332976	437717	491879	488640	449699	6375	6127	6582	5953	5178	5457	213	484	443	195	306	321	154133	149688	147749	142415	137701	129806
10.77_917.83				917.828	ESI (+)	10.769	7938	11178	9356	5792	8430	11114	20612	22928	25148	25767	24752	23309	3145	2195	2713	2924	1782	1626	63	2.64	106	53	26	32	18061	18931	8403	19035	19331	19456
10.77_867.75				867.745	ESI (+)	10.772	6237	2531	229	2749	2039	1993	39759	37902	36792	49291	45991	34948	1110	1113	1043	1483	919	1077	59	86	135	58	5.5	55	15976	24425	25975	14348	21793	16281
10.78_906.84				906.838	ESI (+)	10.781	1.41	1.41	1.41	1.41	1.41	1.41	20193	21155	25955	27756	27868	26766	1.41	1.41	1.41	1.41	1.41	1.41	31	49	51	112	106	14	11943	12464	12327	11954	12167	10825
10.78_925.80				925.802	ESI (+)	10.782	3428	5468	3121	1502	1926	3653	14766	12252	16541	18845	21038	18108	2380	1902	1704	1300	1469	878	59	30	32	2.95	83	31	5087	5947	4410	5027	6322	3233
10.78_917.81				917.808	ESI (+)	10.783	2204	1465	4191	1984	1244	1966	4841	4221	9118	5455	5428	2896	719	786	918	872	538	703	2.75	35	61	2.75	28	32	5719	2280	4301	4083	3865	5017
10.79_905.77				905.772	ESI (+)	10.785	1181	1115	3.99	1362	953	1447	12511	9101	12603	13820	7465	12799	3.99	3.99	3.99	3.99	3.99	2523	3.99	3.99	72	40	92	71	8354	9298	7685	8134	2186	7025
10.83_932.86				932.86	ESI (+)	10.827	2464	1341	3310	2707	4267	5839	16355	20141	20483	19216	22553	20867	3.71	3.71	3.71	3.71	3.71	3.71	66	78	107	37	65	50	11394	13069	14823	15892	16810	16262
10.83_870.71				870.71	ESI (+)	10.828	2615	3146	3851	2618	2754	3331	7985	7539	8144	8313	7915	7900	32	2.66	102	2.66	2.66	2.66	28	27	62	103	2.66	30	7273	7553	7582	7107	7268	9102
10.83_575.50				575.504	ESI (+)	10.829	1886	3061	3515	1686	2179	2686	27066	26357	28979	32650	34904	31664	181	257	270	234	76	323	4.01	40	50	46	71	70	14709	14562	13976	13567	14117	14528
10.83_1684.46				1684.46	ESI (+)	10.829	399	259	838	183	314	453	4183	4277	4630	4560	4496	4687	2.68	2.68	2.68	2.68	2.68	2.68	2.68	2.68	2.68	2.68	27	40	2636	3819	4415	4204	4447	3832
10.83_589.52				589.521	ESI (+)	10.83	2168	3298	2768	1457	1850	2448	32396	29292	32137	38214	40681	37210	228	291	169	359	199	50	3.58	3.58	83	63	3.58	36	13701	13066	13332	13476	13415	14242
10.83_563.50				563.504	ESI (+)	10.83	2150	2934	3833	1879	2176	3000	29683	27339	30706	35246	35620	32049	549	458	435	555	503	425	29	76	89	39	35	71	16745	16354	16122	16604	16633	16611
10.83_911.69				911.685	ESI (+)	10.83	1475	1896	7.56	690	633	687	6905	5983	6951	7127	6524	6530	113	314	7.56	7.56	141	7.56	107	127	78	98	113	76	6309	6403	6559	6202	6214	5796
10.83_865.78				865.784	ESI (+)	10.831	2.5	2.5	2.5	2.5	2.5	2.5	6573	5358	6025	8042	4723	7365	1552	558	1256	1112	673	1021	2.5	66	2.5	25	69	43	4398	3974	3135	4040	3575	3433
10.83_937.70				937.703	ESI (+)	10.831	2570	3159	3134	1247	2502	2666	9799	9306	9239	9917	10340	10922	695	471	434	568	625	419	43	40	35	48	3.54	3.54	6819	7052	6460	6737	6758	6356
10.83_958.88				958.88	ESI (+)	10.831	3561	2456	2662	1918	2871	4243	10061	15034	13004	11067	15292	14226	1589	1526	2141	2052	1653	1723	3.05	31	3.05	50	3.05	3.05	6329	8121	8460	10023	10723	10720
10.83_917.83				917.834	ESI (+)	10.832	893	2.64	2.64	2.64	2.64	2.64	6556	4258	2.64	4043	5213	4268	329	422	315	292	375	362	52	52	29	60	26	2.64	4681	3710	3235	5988	3879	5169
10.84_841.73				841.729	ESI (+)	10.835	822	1292	2361	1850	1520	1911	6897	5061	7589	8346	5949	5981	4044	4177	4758	4674	4318	3997	126	195	159	97	55	174	5454	5956	4558	4525	4265	4082
10.84_916.83				916.83	ESI (+)	10.837	3755	4200	4343	2459	2745	3448	15958	14678	16096	16798	18562	17253	1112	1175	1228	1142	1046	973	3.06	3.06	49	31	32	31	10381	10466	9938	9913	9683	9580
10.84_877.04				877.043	ESI (+)	10.839	4.28	225	4.28	4.28	174	570	29143	11235	2362	34010	24246	25608	295	146	349	101	4.28	123	4.28	4.28	76	4.28	4.28	43	4.28	5242	4.28	4.28	4.28	4.28
10.84_938.81				938.809	ESI (+)	10.84	1810	2634	615	1146	1442	2272	5419	8710	8295	9891	12919	11066	247	265	364	349	198	187	54	35	56	31	3.08	38	6302	3200	3206	4254	4688	4277
10.87_855.74				855.739	ESI (+)	10.871	5129	6543	8081	5190	5072	7028	15987	14986	16150	16633	15916	15707	171	244	124	165	235	117	60	64	26	2.61	81	56	15575	14984	14870	14890	14268	13869
10.92_551.50				551.505	ESI (+)	10.918	3473	947	1200	1387	2910	2905	5507	8659	6380	6406	8219	7018	480	983	1588	2307	2751	3709	394	777	1416	1902	2502	3413	3528	4011	4795	5786	6473	8080
10.92_906.83				906.832	ESI (+)	10.919	2893	2767	6084	2996	2334	4515	18662	12826	14087	8191	16291	20797	644	3.91	3.91	3.91	3.91	3.91	60	39	196	77	79	209	14121	10118	14710	10284	5635	13506
10.92_920.87				920.868	ESI (+)	10.924	2.36	2.36	2.36	2.36	2.36	2.36	3696	6624	8603	5143	8941	5572	24	2.36	141	144	100	28	44	59	108	47	65	70	2010	5406	3486	6460	6909	7613
10.93_589.52				589.521	ESI (+)	10.926	814	1218	1548	969	975	1417	14170	12179	14311	17118	20387	18617	388	278	308	285	164	256	6.77	6.77	68	6.77	74	68	5659	5326	5451	5260	5162	5856
10.93_888.81				888.807	ESI (+)	10.928	38331	49870	59143	31089	35689	51981	752876	722507	786937	889634	1183175	1059986	25191	25892	27726	25986	24251	24354	82	197	199	103	93	145	320089	312585	310255	314006	315254	320186
10.93_958.88				958.883	ESI (+)	10.928	2835	3866	4292	2814	3120	4113	25467	25776	28177	27187	38582	33955	1699	679	948	1550	1385	1531	4.5	4.5	86	62	45	110	13468	13387	13797	13637	14570	13543
10.93_563.51				563.506	ESI (+)	10.928	791	981	1559	1009	967	1137	12365	11846	13739	15404	18244	16475	44	49	98	30	43	3.01	48	3.01	3.01	60	3.01	33	7060	6985	6988	7018	7200	7097
10.93_878.82				878.816	ESI (+)	10.929	1099	1218	1807	874	776	1391	6541	5641	7305	7478	8362	7992	120	300	46	249	140	197	31	3.05	56	46	95	73	6443	5777	5886	5783	6061	6243
10.93_925.70				925.705	ESI (+)	10.931	814	845	1788	369	1369	1173	9147	8716	9555	10357	9566	9810	129	72	26	62	183	126	2.6	34	72	58	63	103	6722	6818	6564	6674	6502	6215
10.95_603.54				603.536	ESI (+)	10.947	730	717	619	263	453	620	7039	6152	7487	8993	9492	8872	164	161	42	45	100	120	34	42	48	46	32	37	2752	2921	2719	2818	2792	2531
10.95_939.83				939.832	ESI (+)	10.949	3507	728	654	1328	944	395	10080	16120	9210	1500	34384	19623	91	5.34	82	145	101	5.34	53	5.34	5.34	5.34	5.34	79	4515	3291	3760	9932	3520	861
10.96_577.52				577.521	ESI (+)	10.957	542	847	1259	735	688	1094	17542	15771	18793	21423	22690	20175	182	189	365	162	220	199	63	42	39	3.53	35	3.53	8420	7900	7575	7630	7634	7692
10.97_904.83				904.834	ESI (+)	10.967	4930	2303	2300	2495	1291	1722	15716	14596	16744	18936	25376	18448	216	3.14	190	94	328	330	3.14	67	3.14	112	31	87	11151	10555	9849	9843	9220	9172
10.97_931.78				931.783	ESI (+)	10.973	3148	3519	2637	1623	2123	2822	15030	14807	15199	15392	16130	14771	8239	8069	9659	9961	8852	8956	37	80	40	58	2.68	27	4782	4040	5131	5627	5182	5428
10.99_919.79				919.788	ESI (+)	10.987	1997	3.18	3.18	3.18	3.18	3.18	10903	8327	7222	12965	11330	14646	35	245	3.18	44	3.18	3.18	56	32	3.18	40	57	50	11405	11237	9440	10765	8471	10347
10.99_958.88				958.882	ESI (+)	10.989	2897	3313	3914	2108	2781	3826	17327	16404	19523	20076	23548	20424	117	120	127	601	329	388	3.49	63	35	69	3.49	114	11419	11752	11541	11950	12304	11158
10.99_909.74				909.74	ESI (+)	10.99	1391	1904	2264	1018	1379	1805	7082	5999	7534	9562	8632	9550	3.26	3.26	3.26	3.26	3.26	3.26	3.26	33	55	3.26	3.26	3.26	5935	5646	5638	5393	5009	6166
11.00_972.90				972.899	ESI (+)	11.001	1079	787	852	356	856	1042	3889	5183	4858	4554	6337	6183	3303	2484	3061	3372	3223	6155	7	59	37	31	40	32	2692	3104	3592	3643	4135	4143
11.02_838.79				838.789	ESI (+)	11.023	558	260	438	139	324	353	8106	4929	14546	11992	7959	6663	785	742	754	841	641	1069	46	91	113	125	4.55	204	5053	6032	3621	3876	3927	3819
11.03_867.75				867.747	ESI (+)	11.027	5520	7865	8950	5083	5653	7814	29444	14462	22929	36326	19305	24534	2.96	2.96	2.96	2.96	2.96	2.96	57	2.96	170	33	30	48	17979	16124	12469	11660	13571	10852
11.04_865.79				865.794	ESI (+)	11.042	1425	2030	1955	966	1297	1815	7531	5675	4785	6975	8363	7783	8783	5916	5035	4531	3737	4158	66	78	98	156	62	168	3934	3876	3116	2512	3288	2785
11.05_906.84				906.843	ESI (+)	11.051	1087	669	1851	1295	1467	1816	7372	7604	8048	8496	10248	8527	16212	15693	17288	16722	16185	15765	50	96	27	52	83	91	4205	4327	4091	4216	4127	4382
11.05_960.90				960.899	ESI (+)	11.052	1034	200	337	286	335	451	5152	6502	6141	5585	7194	8417	9472	11502	12964	12655	13170	13154	2.81	29	34	2.81	28	76	2791	3072	3840	4098	4942	6998
11.05_932.87				932.867	ESI (+)	11.054	2258	1196	1643	2103	2445	3026	11396	6774	9869	11417	12186	10096	21564	21593	22749	22169	20577	20251	66	55	93	50	34	88	5520	5225	4987	4692	4166	4717
11.05_947.88				947.884	ESI (+)	11.055	761	270	2313	1372	1499	1911	15920	16973	17539	19199	22333	21274	84984	83407	87310	82514	77341	74459	68	73	46	4.6	64	68	9196	9870	9765	9747	9940	9095
11.06_952.84				952.838	ESI (+)	11.061	2789	4143	2707	899	1336	2896	13123	12603	13115	17285	20993	18658	1767	1771	1995	1732	1768	1584	45	40	29	49	52	28	4805	4270	4689	4237	4161	4386
11.08_919.79				919.785	ESI (+)	11.078	3018	3572	3092	2352	2894	4079	15867	15510	12948	16912	18740	17372	3.1	3.1	3.1	3.1	3.1	3.1	3.1	3.1	31	66	46	68	5489	5846	5843	6261	6444	4636
11.10_916.84				916.835	ESI (+)	11.099	682	823	985	2.56	575	2.56	11587	18169	16898	8423	28596	21064	3549	3642	3285	3123	3807	4198	70	33	44	26	142	88	2.56	4287	3596	2550	3991	3329
11.10_952.82				952.825	ESI (+)	11.099	977	3827	2707	903	685	2896	8767	8165	11191	11782	11256	9474	847	875	648	1325	596	930	44	63	43	30	32	69	2598	3237	3672	3921	3223	2411
11.12_972.90				972.9	ESI (+)	11.117	5463	3831	3033	2371	3888	5295	12380	18704	15535	14050	16436	15679	40378	39594	40851	38974	37086	33903	34	53	75	14	108	55	8487	9971	11567	12472	13818	14464
11.12_850.79				850.789	ESI (+)	11.119	7532	10989	17726	9590	10310	15448	146656	83990	175991	207360	182375	153687	111933	80833	81131	37381	37145	16820	421	187	234	299	384	234	48921	59254	46485	38175	34433	34178
11.12_917.83				917.827	ESI (+)	11.123	2093	3374	2224	1139	1489	2311	9386	9306	10319	11521	11631	10846	4267	3793	8496	2879	2293	1117	43	74	30	35	31	110	6482	6362	6315	6003	5971	5791
11.12_575.50				575.504	ESI (+)	11.123	1648	2618	1540	1070	1270	1689	13820	13329	14397	17617	16328	14368	1890	1904	2008	1767	1723	1711	48	54	32	49	3.21	57	6190	6131	5838	5703	5862	6714
11.13_891.06				891.062	ESI (+)	11.127	268	2.98	2.98	274	193	2.98	7698	12067	18910	25026	31135	25324	741	306	2.98	188	106	145	53	2.98	2.98	54	30	2.98	2.98	2.98	2.98	2.98	2.98	2.98
11.13_603.54				603.535	ESI (+)	11.127	3095	4591	2914	1517	2160	3396	23673	23674	26873	32259	31342	27045	6925	5384	5579	3167	2821	1624	34	2.6	2.6	74	26	58	10986	11211	11018	11087	11368	12162
11.13_958.88				958.882	ESI (+)	11.128	17200	22413	14565	9612	13727	19075	67925	74485	77490	84358	84663	73998	6876	6952	7753	6791	6929	2173	3.74	88	109	37	41	53	42486	43379	45458	45810	45078	43673
11.15_928.83				928.835	ESI (+)	11.147	3028	4204	3065	1833	2318	3380	25515	31156	37065	30989	49602	42922	29711	29361	30838	10061	8770	7992	66	2.87	2.87	29	63	2.87	11061	11707	12229	11843	11913	12281
11.17_934.88				934.878	ESI (+)	11.167	4.48	4.48	4.48	4.48	4.48	4.48	10548	10354	13282	13759	15146	13152	441	4.48	4.48	4.48	843	324	48	135	133	45	93	82	5949	5627	6402	6757	6337	5862
11.21_891.82				891.821	ESI (+)	11.205	51.23	51.23	512	51.23	51.23	51.23	44906	42096	52269	57573	61655	55907	14809	14928	15656	15449	13233	13806	51.23	51.23	51.23	51.23	51.23	51.23	30883	30868	29607	30313	30503	31288
11.21_986.91				986.911	ESI (+)	11.213	2103	1435	1310	642	1481	1968	4327	8236	7159	4806	8236	6967	393	218	255	425	189	302	3.3	59	48	33	73	46	2724	3414	4339	4681	5166	5422
11.21_603.54				603.536	ESI (+)	11.215	999	1270	1098	472	761	939	10006	9953	10851	12297	13996	12113	385	366	385	303	153	181	39	84	2.98	36	30	52	4120	4381	3882	3981	4231	3930
11.22_972.90				972.897	ESI (+)	11.216	6962	8053	6937	4712	5988	7702	38734	39850	43542	45643	53066	49561	1904	1643	1594	1500	881	646	382	438	593	613	439	537	18958	20013	20060	20507	20977	20095
11.22_965.73				965.734	ESI (+)	11.217	1128	1471	1407	785	1237	1622	5976	5420	6030	6207	7015	6224	445	254	178	224	84	79	37	37	40	91	67	34	3620	4015	3579	3582	3699	3304
11.22_838.78				838.784	ESI (+)	11.218	1959	2256	3980	2713	2984	3411	21360	11262	19721	29825	19972	23993	3433	3475	3868	3823	3268	3857	587	512	396	510	424	1159	8560	9824	6973	6029	5735	5836
11.22_617.55				617.549	ESI (+)	11.218	709	1015	801	368	507	682	7684	6893	8294	9364	10218	8861	11	123	54	16	57	39	40	1.09	36	1.09	30	28	3053	2886	3029	2964	2909	3458
11.22_960.89				960.892	ESI (+)	11.222	3744	1163	2371	1681	3392	4261	8836	13130	12528	9970	13939	12643	1916	1730	2432	2354	2163	1544	65	100	68	32	59	156	6064	6598	7717	8249	8807	9335
11.23_946.88				946.881	ESI (+)	11.226	9971	11822	13077	7764	10155	13451	47173	50122	53663	54323	61032	57014	780	1216	966	948	664	700	95	122	3.75	38	58	41	23770	25108	27144	26099	26047	25049
11.23_864.80				864.803	ESI (+)	11.229	5404	7576	15202	8181	8051	12452	102985	52621	105129	146808	109273	95199	15251	15216	16418	16204	14235	14330	354	257	233	221	304	274	48003	45260	38341	34799	25150	22080
11.23_939.72				939.717	ESI (+)	11.23	2091	1883	2502	1678	1952	2571	6066	5944	6424	6691	6599	6087	66	103	3.84	56	80	3.84	3.84	103	38	58	3.84	42	4110	4044	4212	4126	4080	3221
11.28_880.83				880.825	ESI (+)	11.276	1400	1492	1485	455	1115	1290	9150	3636	7692	10147	10355	3850	10.66	387	408	739	1026	1277	107	211	125	702	990	1393	3094	2214	2750	1791	2920	3186
11.29_879.82				879.818	ESI (+)	11.292	2256	8518	3175	1527	2114	2531	18763	9326	17440	78544	19547	16454	411	256	1187	1849	2232	2432	190	297	521	1410	1605	2151	8993	8083	7511	6334	6327	6935
11.31_986.91				986.915	ESI (+)	11.308	997	1378	1233	592	935	1275	7663	7641	8491	8345	11838	10276	218	204	97	168	181	65	2.75	37	37	28	2.75	31	4479	4336	4303	4516	4629	4413
11.31_917.83				917.832	ESI (+)	11.308	10517	13679	13900	7593	8687	11954	127353	126819	140800	158989	227021	194347	1524	2165	1458	952	1107	410	72	81	169	101	6.66	67	49586	49164	47705	49302	49421	49678
11.31_921.79				921.794	ESI (+)	11.313	3631	4654	3801	2501	2602	2873	23988	22087	24251	25458	32239	29521	542	654	767	423	174	5.94	5.94	62	89	59	5.94	5.94	14486	13912	13384	13277	13269	12624
11.32_974.92				974.916	ESI (+)	11.316	1736	1324	1730	360	1845	2703	5480	9321	7536	6628	9375	8664	72	3.24	3.24	53	101	67	3.24	109	3.24	3.24	3.24	32	2906	3919	4283	4925	5575	5568
11.32_906.85				906.846	ESI (+)	11.318	1196	1113	1571	920	1604	1407	4560	6036	5059	5069	6243	6405	277	108	31	142	257	281	49	44	68	3.07	31	3.07	2380	2960	3161	2973	3558	3351
11.32_960.90				960.897	ESI (+)	11.321	6163	8348	9928	6055	7321	10784	36743	39493	45004	44949	54993	46678	618	404	102	258	117	139	3.63	61	68	36	41	3.63	20853	20448	20512	20694	20917	18512
11.33_954.85				954.848	ESI (+)	11.329	1606	2341	1473	1011	647	1128	14235	14252	15285	17626	20505	17527	1040	683	809	702	420	578	2.91	71	31	50	29	77	2271	2535	2648	1674	3557	2831
11.33_942.85				942.85	ESI (+)	11.334	1261	1775	1196	344	640	1269	7332	6861	7875	8438	12741	10756	189	125	255	251	212	290	44	36	33	41	3.25	43	5131	5421	4836	4921	5227	5383
11.36_966.85				966.849	ESI (+)	11.358	2848	1749	2544	1360	1887	1914	5655	5744	7460	8184	8990	8324	45	31	44	124	37	71	32	2.66	75	32	2.66	27	3699	3248	3343	3310	3194	3653
11.37_986.91				986.914	ESI (+)	11.367	1094	1477	1225	609	1007	1275	7663	3991	5807	8345	7069	6674	121	79	97	52	110	218	54	39	2.75	28	2.75	2.75	4479	4336	3813	3433	3097	2247
11.40_857.76				857.756	ESI (+)	11.398	1615	1620	2801	2140	1966	2667	5327	5251	5318	5464	6815	6079	10897	11494	11753	11260	10277	10418	527	817	675	794	925	1244	3857	3935	3902	3872	4114	4680
11.45_974.91				974.913	ESI (+)	11.451	1990	998	1289	782	1644	2247	6841	5134	7775	8296	10377	8902	11037	11247	12236	11837	11591	5439	17	1.68	36	25	1.68	1.68	4024	4172	4294	4349	4795	3258
11.47_937.77				937.766	ESI (+)	11.47	1313	2028	133	374	968	1253	4781	5738	5905	6717	6931	6353	3.59	3.59	3.59	3.59	3.59	3.59	3.59	3.59	39	36	50	59	3291	3255	2673	3056	3721	3897
11.48_878.82				878.818	ESI (+)	11.48	6927	19006	14564	7035	8312	11261	174834	30937	201679	226132	111590	239756	203753	206185	61759	28046	10438	6429	181	362	349	193	192	200	80426	80258	34352	20088	13217	9980
11.49_986.91				986.913	ESI (+)	11.487	5298	1625	3648	2469	3469	4546	14882	16950	17167	18358	18679	16989	347	274	240	297	84	235	3.11	31	38	3.11	3.11	75	9764	10032	9841	10341	11008	10138
11.52_905.84				905.837	ESI (+)	11.518	26990	10773	10799	5832	21533	9568	34726	149276	30742	44997	33645	32936	39181	33970	21937	9340	4155	2401	157	64	92	130	51	92	19179	17740	14104	11833	58320	57747
11.55_874.82				874.824	ESI (+)	11.548	2.64	3366	1831	988	1482	1767	10909	8885	12193	13909	13328	12798	2.64	2.64	2.64	2.64	69	2.64	2.64	2.64	26	2.64	54	2.64	9992	8687	8251	7995	8244	570
11.56_974.91				974.912	ESI (+)	11.557	3825	7606	6208	3143	3817	4706	3925	17123	21100	6223	22835	7182	3509	2258	1426	533	180	90	76	31	37	3.05	41	33	9948	4044	9794	8839	9199	7518
11.58_1000.93				1000.93	ESI (+)	11.58	122	4291	2639	1425	336	2350	10694	9690	10937	11891	13083	12491	600	255	812	42	53	88	3.59	3.59	3.59	3.59	59	3.59	6123	6088	5836	5842	2544	1015
11.60_925.77				925.767	ESI (+)	11.596	2555	1835	2100	1325	1721	2387	6072	6420	6859	7009	7774	7306	26	217	151	88	95	69	2.57	66	60	2.57	45	47	3283	3730	3882	3310	3676	4267
11.63_892.83				892.833	ESI (+)	11.631	14392	7127	10132	5042	18756	27599	139144	81629	139799	41095	169679	163029	5333	4752	4607	3800	488	470	1.07	244	11	56	154	49	59997	55092	47846	38600	34168	34409
11.64_988.93				988.926	ESI (+)	11.638	2249	3349	3321	1486	2131	2120	11307	8823	12209	13111	14846	14069	133	127	133	3.13	84	64	3.13	54	31	32	3.13	46	5626	5809	4894	4648	4680	3951
11.67_946.87				946.871	ESI (+)	11.673	926	3094	1887	892	722	997	6616	3776	6526	8441	8010	7899	284	165	211	376	89	133	41	38	59	3.84	89	3.84	5130	4848	3837	3106	2417	2404
11.68_962.91				962.913	ESI (+)	11.675	1335	2530	3710	2074	2143	3139	9073	7203	9545	10896	11729	10900	386	67	88	16	131	305	71	60	1.58	111	44	112	4388	4528	4034	3438	3624	3433
11.70_879.78				879.78	ESI (+)	11.7	7705	16351	11457	6879	7495	10267	3686	2811	3886	4642	4338	3821	3.61	89	83	3.61	117	132	62	69	3.61	41	36	36	5503	5582	4924	4463	3989	3627
11.73_880.83				880.835	ESI (+)	11.734	8518	18804	13258	9283	7533	9823	22053	14159	21276	25903	30028	25771	26133	27601	24161	20356	14940	14061	3562	3908	2629	2620	1855	2741	15348	13672	12747	10281	8759	8863
11.75_976.93				976.929	ESI (+)	11.747	638	2120	2940	1674	1630	1731	5917	5534	8826	9035	9544	8890	3912	3874	4310	3632	3285	2712	49	62	30	60	74	51	4351	4845	4427	3842	3290	3041
11.78_577.56				577.558	ESI (+)	11.778	3590	11550	7514	3743	3653	5133	21992	14693	26146	30458	30071	28847	3.64	3.64	3.64	59	102	45	36	46	3.64	3.64	44	51	19834	18151	16054	14471	11823	8605
11.79_591.57				591.575	ESI (+)	11.787	1980	6418	4209	2318	2014	2774	14167	9615	16315	19437	19687	19240	837	920	813	796	28	84	38	40	101	45	37	64	12064	10746	9519	8089	7060	4610
11.79_902.86				902.857	ESI (+)	11.793	1907	5923	2847	1507	161	784	9854	7593	10367	11663	12649	12146	4.5	4.5	4.5	4.5	4.5	4.5	45	55	92	4.5	4.5	69	10609	9851	9320	8636	6854	5905
11.86_925.83				925.832	ESI (+)	11.86	494	4440	5116	3047	3514	4853	10089	8764	12310	10912	12898	12346	478	92	397	313	257	194	3.61	3.61	36	65	45	77	7688	7531	8139	7696	6022	574
11.86_902.86				902.856	ESI (+)	11.864	1932	29165	13452	6611	4829	7304	5048	1881	5818	6416	6127	5999	5.38	5.38	73	5.38	5.38	5.38	113	77	5.38	54	5.38	91	7168	6145	5403	4209	2240	851
11.87_1002.94				1002.94	ESI (+)	11.867	5348	5363	4248	2389	3454	4798	548	8436	1301	1354	2066	9907	212	440	277	67	86	69	39	87	44	32	30	43	1064	7133	7113	6843	7336	7045
11.88_1004.96				1004.96	ESI (+)	11.876	487	2659	2817	1339	1113	1250	4567	2694	5724	6023	4470	5746	1777	1655	1790	1261	63	48	176	171	171	66	62	4.76	3810	4394	3836	3285	2286	1262
11.88_888.84				888.84	ESI (+)	11.881	4852	19720	10302	5381	8308	11141	3389	2996	3988	4608	3949	4216	47	53	3.63	39	57	79	71	69	3.63	36	56	53	5535	5799	5183	4988	4317	1353
11.90_990.95				990.946	ESI (+)	11.898	1131	376	522	2359	2480	2996	666	6429	8967	5982	7168	10085	236	149	302	383	314	109	83	62	134	112	3.3	33	895	330	5947	6011	5129	1929
11.93_920.87				920.869	ESI (+)	11.933	7103	152	214	76	940	1659	292	1770	875	983	943	1035	207	4.89	190	49	136	118	65	119	124	143	110	189	339	526	330	1523	40712	14438
11.96_962.91				962.912	ESI (+)	11.961	783	11272	8393	3896	656	1300	9379	2564	12473	13752	13238	17024	7222	6351	6853	552	314	52	437	421	237	297	5.15	68	9423	8663	8319	7282	2121	1225
12.00_948.90				948.896	ESI (+)	11.996	900	224	103	5515	5279	7848	55	10101	1164	288	17488	17126	205	85	152	1125	798	200	79	12	37	232	251	202	464	862	10971	9458	8955	516
12.10_1239.10				1239.1	ESI (+)	12.101	97	10522	10307	5272	7925	10746	1308	1285	1444	1749	1144	1008	2.72	2.72	2.72	2.72	2.72	2.72	2.72	2.72	2.72	2.72	39	2.72	3807	3728	3728	3521	2.72	2.72
12.34_1072.02				1072.02	ESI (+)	12.341	50	111	1.16	88	10046	9936	62	9795	31	12	1.16	23	37	28	56	53	6628	48	40	40	87	588	10176	1.16	57	16	30	10212	10426	91
12.34_369.35				369.352	ESI (+)	12.342	1188	1716	1295	1415	200940	194502	1182	184142	1158	1124	1508	1440	701	895	763	99437	96419	971	1338	1508	1638	4348	203029	1512	1235	1241	1591	193299	195619	967
12.34_1027.98				1027.98	ESI (+)	12.342	32	338	218	78	85620	82162	107	78865	129	218	235	153	154	120	69	41122	40130	72	216	261	256	1428	86879	50	61	192	518	82467	81429	65
12.34_1049.96				1049.96	ESI (+)	12.342	3.66	143	85	175	29578	27942	3.66	27190	289	154	79	132	45	103	235	21997	21729	3.66	3.66	141	140	1321	29687	3.66	127	80	81	28718	28709	182
12.34_659.64				659.635	ESI (+)	12.342	81	179	136	108	32403	29459	32	29595	149	153	106	50	77	38	55	15845	15100	46	139	111	174	719	32473	78	43	97	114	30846	30655	58
12.47_1027.98				1027.98	ESI (+)	12.471	97094	84	156	114	153	136	36	221	167	56	128	167	92	53	49	45	1.45	109	304	33	187	216	107	94638	1.45	44	106	210	189	91056
12.47_1115.08				1115.08	ESI (+)	12.471	42138	2.78	29	2.78	59	58	88	2.78	30	33	2.78	79	2.78	29	54	52	46	173	55	2.78	67	104	44	40954	32	30	2.78	83	64	39304
12.78_391.29				391.285	ESI (+)	12.779	92176	1017	781	1034	1093	1155	1068	1159	883	1022	795	755	869	737	1212	1175	1336	94937	801	974	1033	864	986	92953	887	1016	1054	1070	1288	90129
12.79_478.39				478.39	ESI (+)	12.786	108290	338	390	359	539	535	394	522	281	331	299	313	384	402	282	386	457	104505	318	263	324	246	546	108275	462	463	348	290	630	107191
5.63_1194.82				1194.82	ESI (+)	5.63	91611	434	1904	2352	62208	61153	1070	75081	2446	943	1587	778	320	364	1369	24699	23854	25011	582	404	1296	8974	33745	33419	438	1586	2465	89099	74993	72195
11.77_882.80				882.803	ESI (+)	11.77	2834	5332	3248	1322	2475	2418	9797	8629	10274	11273	12999	11752	87.48	87.48	87.48	87.48	87.48	87.48	87.48	87.48	87.48	87.48	87.48	87.48	7841	6631	7423	6997	6446	5545
10.34_904.79				904.793	ESI (+)	10.339	3552	5242	12317	6224	4302	6202	2.9	2.9	2.9	2.9	2.9	2.9	2.9	2.9	2.9	2.9	2.9	2.9	29	2.9	34	2.9	2.9	39	4769	3309	3349	3758	2435	4704
6.81_642.60				642.602	ESI (+)	6.809	256	437	3.35	224	225	294	652	674	1284	1611	1245	1058	111	3.35	43	41	38	3.35	52	34	3.35	43	48	56	4215	4029	4244	4150	4257	4637
5.97_668.62				668.619	ESI (+)	5.967	9582	8546	8782	18975	7128	9022	9198	21713	8163	8524	7331	7542	6084	15068	5354	7332	5134	9466	3834	5875	2967	4610	10300	12513	10074	12426	10230	9744	10004	16523
10.52_1353.37				1353.37	ESI (+)	10.516	2060	19304	1439	4306	529	1144	16038	1338	1558	41	2732	932	771	33786	4.13	488	267	2280	13571	1133	2258	1061	19025	3690	4.13	5236	421	775	1646	2100
6.61_606.58				606.581	ESI (+)	6.612	1917	2976	925	706	983	2048	3406	3023	4212	4647	4052	4049	80	52	3.15	34	32	3.15	62	32	47	84	46	34	4204	3993	3904	3897	3851	4665
8.29_698.64				698.644	ESI (+)	8.288	1800	1960	1131	779	648	1352	7141	6755	8685	9867	9339	8371	87	5.47	69	55	59	102	99	84	77	64	187	58	3626	3393	3170	3752	3453	3795
9.23_734.74				734.738	ESI (+)	9.23	993	877	1346	1006	940	1295	3843	4163	4489	4605	4716	4028	48	70	34	20	44	35	100	1.98	1.98	1.98	33	1.98	3464	3474	3174	3724	3679	3627
9.36_748.76				748.756	ESI (+)	9.36	522	688	912	725	713	887	4187	4320	5351	5805	5958	5416	50	53	62	35	29	102	51	31	2.9	32	33	90	3335	3205	3499	3439	3431	3348
8.91_746.74				746.739	ESI (+)	8.911	268	117	90	50	151	117	2588	2759	3139	3382	2787	2719	2.82	43	29	45	2.82	65	30	61	45	29	28	79	2836	3426	3100	3261	3297	3101
11.85_920.88				920.878	ESI (+)	11.854	4865	43227	48732	26265	19704	25838	102353	63033	116779	119404	116360	124342	3687	3193	3309	3085	2668	1592	373	138	91	131	336	92	76304	76031	66987	56445	40712	3885
11.86_946.89				946.889	ESI (+)	11.856	1914	62793	46726	24708	22165	17783	82598	55265	101982	106490	114600	111268	3200	2809	3111	2116	2036	637	246	217	168	100	172	84	74535	72504	64848	55077	41725	4901
11.86_990.95				990.955	ESI (+)	11.858	121	3393	3880	2359	1097	132	7281	6544	8967	6933	8133	9085	264	194	63	116	182	92	95	85	89	134	69	75	5645	5657	5947	5907	3392	640
11.85_1016.97				1016.97	ESI (+)	11.854	1274	4438	3356	2211	1783	3799	5401	5712	6608	5629	7204	8120	181	76	117	84	98	72	57	75	3.2	48	32	36	5348	5607	5771	5705	4987	676
12.34_1115.08				1115.08	ESI (+)	12.342	89	142	59	63	42137	39231	106	38015	73	92	78	106	34	63	111	23174	22925	37	130	73	195	812	41259	42	91	55	228	41664	40372	136
0.58_244.19				244.19	ESI (+)	0.583	53949	244	218	302	24841	8617	521	7783	400	559	349	474	422	332	232	645	6735	6642	924	928	1142	2217	27547	29564	417	726	178	755	13299	16979
11.73_578.56				578.558	ESI (+)	11.732	997	4815	3086	1663	1140	1455	10126	6592	11329	12976	12547	12619	36	77	144	25	61	83	139	111	61	87	56	57	8834	7977	3601	2901	2110	1862
7.46_630.58				630.58	ESI (+)	7.465	782	798	648	301	409	740	3562	3745	5182	5552	3716	3386	47	56	74	49	3.95	69	3.95	3.95	60	40	43	50	4411	4810	4969	4929	5168	5020
6.62_768.63				768.632	ESI (+)	6.617	6.29	6.29	6.29	1986	1009	6.29	20124	21132	27428	31442	26124	25969	6.29	179	6.29	6.29	6.29	6.29	119	63	77	98	6.29	6.29	26294	24482	25618	23346	26171	28029
8.54_780.63				780.63	ESI (+)	8.541	19698	28204	26320	13781	22813	30487	6432	7447	7777	9023	9931	9367	63	78	203	51	11	128	44	75	32	1.08	1.08	84	12200	11630	11199	10875	10961	11457
10.48_840.72				840.717	ESI (+)	10.481	5135	7218	10277	6397	5989	8059	24734	19058	19789	25213	27624	26205	1453	1725	1789	1778	1659	1557	181	4.8	162	55	48	77	17933	15019	16117	12529	13287	13470
10.73_844.75				844.75	ESI (+)	10.733	1631	2300	1741	657	1132	1937	6660	6341	7130	7926	7159	6844	122	169	45	94	60	93	251	132	4.5	178	165	151	4900	4797	5190	4946	4745	4886
10.68_854.74				854.735	ESI (+)	10.68	1961	2692	4081	2728	2154	3117	50844	46337	54698	57458	59652	58205	76770	77935	79685	77095	68377	62057	119	272	208	125	188	202	30175	29507	28768	28769	28645	28196
10.01_850.71				850.706	ESI (+)	10.011	3244	601	277	177	1630	993	9292	9381	10634	12221	12553	11039	1837	1980	1736	370	599	752	34	3.38	37	88	3.38	3.38	3432	4319	4675	4627	5583	3835
10.97_870.76				870.764	ESI (+)	10.974	206	661	1680	730	359	1069	5926	6163	6698	7561	7763	7056	154	50	129	98	94	2.55	28	31	2.55	57	26	47	2932	3446	4204	3174	4036	4045
10.82_868.75				868.747	ESI (+)	10.817	177	866	1983	530	671	950	6718	5743	6924	7350	7242	7321	6344	6120	6421	6473	6092	5224	78	50	51	101	52	78	6478	6356	6454	8355	5598	5742
10.56_866.73				866.732	ESI (+)	10.556	3795	5325	6825	3935	3991	5589	35322	32388	36848	36836	40344	40476	996	878	835	174	3.5	3.5	3.5	3.5	3.5	3.5	35	3.5	27064	27494	26574	26070	25967	25673
10.27_864.72				864.724	ESI (+)	10.274	1643	2900	3330	1758	1925	2955	8238	7621	8416	8502	9671	9078	2.88	2.88	2.88	2.88	2.88	2.88	44	2.88	41	2.88	29	33	4476	4174	4312	4261	4302	2273
11.04_914.83				914.832	ESI (+)	11.038	1391	2.94	2.94	2.94	2.94	1207	17558	39887	43376	2.94	57508	31249	2.94	2711	2.94	670	2218	365	2.94	2.94	42	32	29	2.94	2.94	2.94	2.94	2.94	2.94	24817
11.36_922.80				922.799	ESI (+)	11.357	3051	3194	2254	1817	1959	2477	14663	10779	16407	16372	14407	17979	181.68	181.68	181.68	181.68	181.68	181.68	181.68	181.68	181.68	181.68	181.68	181.68	8666	8928	8086	7181	7228	7255
1.70_412.34				412.341	ESI (+)	1.697	10376	9859	4767	2013	8559	9772	2673	4497	5069	4752	7592	5606	81	64	100	114	56	95	76	127	101	86	93	84	4525	4555	4993	4521	5456	5704
2.78_430.39				430.389	ESI (+)	2.779	14.64	5552	3727	33502	4091	5755	6021	37175	4669	4151	3526	1166	2790	16025	3323	10017	3450	14.64	6626	10940	1890	8430	30195	375	9418	11158	10001	10007	10666	14.64
6.76_610.54				610.543	ESI (+)	6.763	842	11600	11339	2427	9777	18083	1096	5.42	851	949	5.42	5717	5.42	5.42	5.42	5.42	5.42	5.42	5.42	5.42	5.42	5.42	5.42	5.42	9062	5091	8775	9435	8948	8581
5.96_620.53				620.527	ESI (+)	5.965	6841	9615	7287	4216	6294	10813	1669	1318	1590	1765	2032	1837	42	53	2.88	2.88	2.88	103	2.88	58	60	60	29	99	3916	3646	3592	3707	3839	3638
7.14_624.59				624.594	ESI (+)	7.139	502	436	755	9.65	452	335	3170	3428	5582	6149	4322	3986	9.65	9.65	9.65	9.65	9.65	9.65	9.65	9.65	9.65	97	9.65	9.65	7959	7914	8286	8561	8022	9037
6.61_648.56				648.557	ESI (+)	6.612	10030	14055	8248	4632	8561	14441	4620	3534	5493	6253	6324	6488	40	39	2.91	59	35	50	74	86	74	29	2.91	81	5238	5385	5143	5154	5079	5070
6.34_646.54				646.54	ESI (+)	6.337	8104	12074	8749	4944	7402	11854	2996	2045	2925	3901	3675	3715	4.21	4.21	4.21	4.21	51	42	85	52	95	49	44	67	4649	4799	4293	3924	3720	4440
6.14_646.54				646.543	ESI (+)	6.141	11728	15231	11099	6779	11581	18037	7882	6852	8457	9958	9876	10627	44	39	72	3.76	50	61	80	3.76	44	38	3.76	66	7438	6855	6876	6904	7290	6888
7.81_652.62				652.625	ESI (+)	7.809	23.48	23.48	23.48	23.48	23.48	23.48	3295	3572	5579	5874	3995	4000	23.48	23.48	23.48	23.48	23.48	23.48	23.48	23.48	23.48	23.48	23.48	23.48	4845	5246	4867	5226	5268	5514
6.31_660.56				660.557	ESI (+)	6.308	9182	12689	8693	4635	8049	12637	9488	7556	10364	12930	13491	13565	199	135	238	100	163	144	5.17	5.17	5.17	66	69	52	8477	8249	8011	7512	7547	6928
7.14_646.58				646.575	ESI (+)	7.137	2515	2825	1731	1112	1615	2603	6633	7592	11518	11932	8965	9010	6.48	220	126	111	113	112	65	89	99	99	107	165	15313	16037	16454	16740	17337	16785
5.10_654.51				654.509	ESI (+)	5.102	23095	28963	16940	9228	16121	25349	4423	8866	5524	6411	6580	6558	2.68	2.68	2.68	47	2.68	69	35	2.68	27	2.68	32	49	9964	9983	9766	9400	9394	12592
4.72_652.49				652.493	ESI (+)	4.719	14264	19490	13567	7424	12249	18070	3034	2673	3726	4769	4323	4643	81	64	3.55	38	59	3.55	3.55	84	36	3.55	44	3.55	154	6650	6288	6497	6339	6937
6.79_674.57				674.571	ESI (+)	6.79	7267	10054	4968	2710	5730	10580	3418	3149	3902	4834	4840	5116	3.7	39	55	41	3.7	3.7	3.7	49	42	37	46	3.7	3836	3514	3601	3584	3379	3664
6.52_672.56				672.557	ESI (+)	6.519	47656	73591	37519	20839	36340	59500	24882	19069	27528	32152	32548	34179	129	127	151	66	32	68	88	92	31	73	44	72	36777	34638	33126	32824	32207	30024
9.51_680.65				680.655	ESI (+)	9.507	2190	2845	2755	1663	1941	2804	3238	3638	4147	4371	4666	3828	38	50	119	49	3.77	64	3.77	3.77	74	49	87	44	4209	4016	3977	4217	4043	3931
7.81_674.61				674.608	ESI (+)	7.809	790	773	431	266	308	730	5030	6138	9396	10356	7533	6392	137	9	61	106	130	155	104	65	99	78	83	61	8405	9264	9245	9297	9357	9630
6.13_684.56				684.556	ESI (+)	6.131	3307	4200	2116	1324	2374	3502	2633	1991	2833	3203	3365	3264	188	67	117	91	155	86	134	69	89	5.51	137	88	3927	3829	3390	3668	3555	3784
5.52_682.54				682.54	ESI (+)	5.518	8577	10834	5817	3419	6541	9605	10582	8678	12090	12775	13059	13411	3.62	3.62	3.62	3.62	3.62	100	3.62	49	36	39	60	79	5484	5327	5461	5287	5073	5445
5.39_680.52				680.525	ESI (+)	5.386	16580	20522	10695	6545	10734	14746	17045	13840	19852	23453	18959	20345	215	3.88	120	79	39	62	137	3.88	59	56	3.88	65	20261	19011	18566	17575	18342	18181
9.63_694.67				694.671	ESI (+)	9.631	2199	2664	2400	1447	1770	2416	4796	5218	5537	6127	7107	6209	54	41	92	4.13	51	4.13	155	53	4.13	4.13	4.13	110	4377	4610	4637	4645	4426	4307
9.19_692.65				692.654	ESI (+)	9.193	1002	1363	835	406	799	940	5284	5614	6352	7666	6582	5586	61	84	65	4.17	67	42	61	93	114	4.17	100	73	7108	7500	7127	7341	6982	6536
8.55_714.64				714.638	ESI (+)	8.554	7404	9652	4284	2355	3097	4749	11039	10381	13023	14104	14835	13384	2.88	76	42	2.88	29	74	2.88	34	50	46	35	58	6669	6768	7093	6585	6468	7434
6.91_760.59				760.589	ESI (+)	6.91	15936	19670	15658	8766	14302	19175	3642	3297	4024	4489	4682	4313	2133	1906	2039	1873	1826	1927	4.91	4.91	153	75	49	67	5505	5338	5562	5562	5621	6352
6.87_744.59				744.59	ESI (+)	6.873	17473	22327	11958	7336	11326	16137	12218	13665	15726	16942	19296	17858	145	311	4.48	4.48	282	119	52	45	4.48	117	83	57	15815	16433	16516	16589	17001	17083
7.83_744.59				744.591	ESI (+)	7.835	10274	12899	9082	5645	7585	9683	1751	1738	2021	2313	4330	4796	213	73	68	95	149	77	46	127	36	3.57	77	60	4773	4804	4800	4422	4627	4530
6.38_772.62				772.624	ESI (+)	6.379	12105	14803	10826	5512	10360	15879	4.5	4.5	4.5	4.5	4.5	4.5	4767	6792	8181	11311	9334	9931	4.5	45	63	85	4.5	48	4.5	4.5	9017	9944	9710	4.5
6.54_784.59				784.586	ESI (+)	6.538	5218	6464	4194	2380	3909	5182	2409	2827	3136	3521	3446	3431	1583	1613	2063	1382	1258	1980	66	108	110	4.92	49	53	4108	3958	4192	4209	4041	4334
7.90_802.63				802.634	ESI (+)	7.896	6473	8084	6596	3778	6015	8017	1537	1653	2229	2385	2541	2510	4.33	4.33	4.33	4.33	4.33	4.33	4.33	4.33	4.33	43	64	4.33	3652	3511	3781	3485	3711	3888
11.85_864.84				864.838	ESI (+)	11.848	390	483	1162	492	618	375	9254	7289	10610	11749	14186	13234	1699	1481	1761	1475	1374	1190	67	67	6.67	85	107	77	1075	6698	6730	5779	5414	4027
11.72_862.82				862.824	ESI (+)	11.721	1924	4812	3691	1788	1612	2285	7218	4469	8190	9943	9110	8219	75	69	29	76	52	56	46	56	2.86	54	2.86	2.86	7255	6670	5892	5014	3461	3219
11.61_860.81				860.806	ESI (+)	11.612	5390	1733	7702	3691	4365	6254	3081	1736	3606	4356	3314	3549	2.67	2.67	2.67	27	29	87	2.67	40	82	37	39	52	4391	566	3404	2901	2806	2759
11.78_876.84				876.84	ESI (+)	11.779	7049	18795	12660	6761	7735	10360	39198	30118	48533	53451	57163	56025	3.24	3.24	3.24	3.24	3.24	3.24	3.24	32	59	3.24	50	72	31668	31391	28978	25396	20801	16598
11.66_874.82				874.82	ESI (+)	11.662	10395	29663	20852	9652	9393	13678	7250	3852	9421	11458	9592	9884	98	2.76	2.76	72	2.76	2.76	2.76	2.76	2.76	2.76	28	2.76	9720	9790	8134	6524	5138	4719
11.44_872.81				872.808	ESI (+)	11.437	578	4261	2595	1432	2286	2855	2697	2390	3142	3565	3724	3333	47	96	63	82	48	4.21	4.21	4.21	42	4.21	42	60	3145	3338	3399	2977	2826	3163
11.85_888.84				888.84	ESI (+)	11.85	2965	19720	10302	5381	8308	10939	3748	2419	3988	4013	3949	4216	47	86	3.21	39	60	79	71	69	3.21	36	56	32	5535	5799	5183	4988	4317	1034
11.90_904.87				904.869	ESI (+)	11.897	372	8569	4101	1418	1575	2064	6714	4701	8416	10303	10047	9614	0.88	55	0.88	76	105	0.88	0.88	53	107	0.88	75	60	5481	5503	4414	3838	910	144
10.26_902.76				902.762	ESI (+)	10.261	1950	1720	6423	3008	3946	1325	8822	8806	5761	11175	6626	10668	1615	1572	1760	2702	2418	1228	36	3.65	37	3.65	3.65	47	3009	2904	2892	2830	2722	2372
11.69_894.83				894.828	ESI (+)	11.686	2237	4533	1996	1901	2217	2814	8127	9838	6282	13913	6476	7917	297	199	346	4.55	46	95	47	199	153	132	127	194	10626	4947	5853	5964	3477	4216
10.23_890.81				890.805	ESI (+)	10.227	2.91	2.91	2.91	2.91	910	2.91	17149	17996	21770	22126	25009	23713	9738	9738	11554	11075	9810	8215	47	31	46	111	29	2.91	2723	1462	2.91	1316	2406	2.91
10.98_920.80				920.803	ESI (+)	10.976	405	3.25	3.25	3.25	3.25	3.25	3.25	3.25	3.25	3.25	3.25	3.25	3.25	3.25	3.25	3.25	118	3.25	54	32	3.25	3.25	3.25	53	4894	5114	3527	3686	3.25	4677
5.69_748.57				748.572	ESI (+)	5.691	20561	27057	28143	15121	21093	29438	3614	4434	5198	6691	5516	5562	223	304	314	396	209	504	70	38	44	33	89	68	17094	15552	14118	14221	14804	18050
6.95_782.65				782.648	ESI (+)	6.951	6300	8156	5429	2839	4524	6706	2193	2127	2809	3231	2917	2765	3.55	3.55	103	141	3.55	3.55	78	38	91	36	38	43	3421	3342	3243	3288	3613	4040
5.70_774.59				774.587	ESI (+)	5.697	68989	95955	101624	43499	79007	98282	53789	56928	74108	96242	69418	70405	35.92	359	35.92	362	35.92	35.92	35.92	35.92	35.92	35.92	35.92	35.92	89836	77309	71160	67581	71515	90671
6.57_790.61				790.615	ESI (+)	6.568	9578	12670	9073	2636	5020	10681	3505	4644	7212	3742	8311	5504	12905	8527	10165	4074	3044	6963	64	45	53	74	29	2.9	3308	5111	4842	6057	3377	6419
5.16_784.57				784.571	ESI (+)	5.155	6836	8511	7832	3674	6833	10381	4373	5711	7113	7515	6975	6788	41687	47358	302109	296920	272472	290181	99	113	88	108	51	70	6640	7118	7335	7312	7787	9077
6.36_802.62				802.617	ESI (+)	6.364	10256	19325	15828	6935	12118	19971	8451	9002	12385	16105	15206	11723	1045	628	1005	547	598	388	4.53	117	45	4.53	96	73	12404	10964	10488	11119	11254	13336
5.79_800.60				800.602	ESI (+)	5.785	22345	21714	14649	7078	18682	27626	11234	19166	21550	19923	21375	18420	575	1164	894	899	1640	5.45	61	82	106	142	55	206	17550	22493	25491	27434	29604	28874
4.89_818.56				818.561	ESI (+)	4.89	7526	8596	6705	3079	6896	10419	3218	4401	5024	5432	5551	4766	220	187	220	355	200	379	40	28	68	25	2.48	2.48	3660	3931	3987	4083	4340	4969
6.60_824.60				824.603	ESI (+)	6.602	3575	4664	2866	805	2241	3367	2687	2598	4112	4468	3863	3734	4.38	4.38	4.38	4.38	4.38	4.38	56	72	4.38	72	4.38	44	3570	3156	3344	3064	3438	4107
5.56_854.64				854.643	ESI (+)	5.556	4794	5430	4814	3161	4662	5769	3364	3671	3885	4393	4161	4191	98	236	206	79	96	152	48	57	46	2.39	24	28	3727	3928	4083	4004	4209	4481
10.51_878.74				878.743	ESI (+)	10.511	7156	9464	1058	3260	4001	7199	41334	31447	41610	40531	50121	48540	1153	1374	1724	1479	781	1206	4.3	50	43	4.3	45	4.3	24182	31254	31346	31275	27548	24095
9.92_888.73				888.728	ESI (+)	9.92	2.75	770	2.75	2.75	2.75	2.75	9533	9287	8243	9033	14551	11915	2.75	2.75	2.75	2.75	2.75	2.75	51	2.75	28	54	34	39	3608	3366	2844	4076	3857	4437
10.24_902.74				902.743	ESI (+)	10.236	3657	6092	1920	2735	2348	5959	10541	12541	20775	21501	8274	23685	4682	4126	10065	9187	4100	2439	33	3.28	35	33	51	3.28	9293	10137	9974	9117	10444	10845
6.50_970.71				970.713	ESI (+)	6.502	6188	7302	5248	2917	5294	7574	4531	4528	5333	6099	6063	5235	4.87	4.87	4.87	132	4.87	4.87	4.87	74	4.87	113	49	166	5484	5482	5623	5822	5962	6290
5.55_838.55				838.553	ESI (+)	5.546	1525	3340	4788	3342	4513	3547	1618	2203	2703	3466	1329	3028	3.44	3.44	3.44	3.44	3.44	3.44	36	61	37	39	34	42	3714	4034	3912	3606	3345	3011
6.36_776.59				776.592	ESI (+)	6.358	10332	13710	13604	3873	8812	16668	3544	3195	1711	513	7555	467	189	328	378	244	471	248	92	50	80	66	45	98	3998	6783	5932	3218	3731	4243
5.80_774.57				774.573	ESI (+)	5.799	13949	9486	7460	7638	13856	5433	9575	11926	13245	10368	13085	13747	1566	109.48	1095	1465	109.48	1475	109.48	109.48	109.48	109.48	109.48	109.48	13208	11321	13613	14644	14211	16287
5.25_788.58				788.582	ESI (+)	5.247	19150	25513	31794	16296	26123	40491	14.21	14.21	14.21	14.21	14.21	14.21	1869	828	229	417	459	297	376	14.21	272	323	285	506	14.21	14.21	14.21	14.21	14.21	1926
5.64_830.63				830.635	ESI (+)	5.641	1607	2297	5536	2256	4511	5903	1791	3113	2422	2795	4608	3673	2.93	146	157	2.93	2.93	159	29	2.93	2.93	40	2.93	77	3616	4073	3970	4102	3707	2957
4.66_850.60				850.604	ESI (+)	4.655	10944	11113	11098	6892	10334	10935	8761	10636	10508	11940	10766	9871	440	750	239	254	625	43	96	28	8	72	23	51	9412	9229	9126	9628	9508	9898
5.63_852.53				852.526	ESI (+)	5.626	3184	3936	4723	3232	4446	5082	2968	3334	4365	4722	4651	4019	519	562	1075	822	652	965	31	48	36	40	44	69	3494	3692	3927	4191	3992	3782
3.97_884.59				884.589	ESI (+)	3.972	8735	11591	6977	1923	6990	9880	4793	7536	10276	9985	9323	8939	31	47	64	2.72	42	52	53	36	2.72	2.72	27	42	3195	4903	5284	5306	5627	5457
4.79_1048.84				1048.84	ESI (+)	4.785	6201	7531	5422	7281	6426	5052	6250	5471	5950	5944	5170	5399	1253	1026	1086	1493	1257	1052	1187	1252	1094	1230	1178	1138	6778	6344	5939	5649	5300	5361
0.57_446.31				446.312	ESI (+)	0.575	13594	400	5742	356	3851	2257	543	6148	3383	2533	3533	1816	149	401	325	604	405	588	1002	517	447	791	1131	1335	359	1355	1117	2245	860	596
6.38_678.54				678.537	ESI (+)	6.382	11103	13779	10183	6420	9368	11179	4084	3719	5328	4862	5562	7084	74	167	1.32	13	45	15	1.32	50	45	98	1.32	1.32	10451	10626	11157	11163	10567	10442
6.85_720.58				720.579	ESI (+)	6.85	5858	7413	5263	3098	4895	6578	8062	8373	10023	10319	10109	9579	200	453	257	15.28	153	348	15.28	15.28	15.28	15.28	15.28	15.28	8474	8888	8900	8704	8786	8851
4.80_718.56				718.557	ESI (+)	4.796	3230	1224	2098	497	6.34	1520	5322	6137	7249	7219	5639	7174	173	6.34	6.34	6.34	6.34	6.34	6.34	63	6.34	6.34	6.34	6.34	4591	6374	5182	6606	4644	6462
4.95_748.51				748.514	ESI (+)	4.951	2.75	2.75	2.75	2.75	2.75	2.75	2214	1397	2187	2928	1524	2283	2.75	2.75	2.75	2.75	2.75	111	2.75	100	76	63	51	27	4008	4377	3340	3041	563	2418
6.93_774.62				774.623	ESI (+)	6.93	3837	4.61	3049	4.61	4788	1785	2676	6248	8041	7562	7161	2806	4.61	478	382	1108	4.61	4.61	52	102	68	46	71	4.61	5789	4682	3820	4634	5797	3006
5.68_780.58				780.581	ESI (+)	5.68	7601	16025	14056	3701	7906	12917	7859	4675	6243	14550	7673	6407	1868	1068	1288	2429	2415	13126	106.85	106.85	106.85	106.85	106.85	106.85	3195	3041	8334	5255	8067	7446
10.36_878.79				878.789	ESI (+)	10.357	3322	1593	8781	6402	5004	6545	7278	7347	8049	11577	5479	8514	3.27	3.27	3.27	3.27	3.27	3.27	33	104	42	3.27	66	54	8731	8888	9185	9518	9310	7622
11.22_924.76				924.758	ESI (+)	11.217	1967	1909	1846	544	1559	1362	7585	6021	7377	7622	8371	7641	266	374	351	101	5.24	134	123	70	52	5.24	69	5.24	4475	4526	4387	3948	4198	5255
5.73_1481.08				1481.08	ESI (+)	5.732	11061	10405	11982	8691	14798	18180	5062	9045	8255	7191	9020	8851	3.12	54	50	3.12	64	71	32	3.12	44	3.12	62	31	6441	8108	9040	9875	10468	10732
5.71_1477.05				1477.05	ESI (+)	5.713	5113	2653	2580	4852	4946	1914	3983	5183	5051	5651	5250	5350	39	3.06	3.06	3.06	3.06	3.06	3.06	36	39	41	31	49	7393	8302	8648	9254	9674	6084
5.27_1537.17				1537.17	ESI (+)	5.274	14983	20891	12005	6350	12378	16466	6896	11608	13729	12337	12098	11687	3.74	137	3.74	3.74	3.74	3.74	37	62	3.74	3.74	129	79	8856	10319	11114	11712	11439	11471
5.27_1559.15				1559.15	ESI (+)	5.272	3437	5592	3141	2075	4413	5071	1457	4130	4374	3536	4033	4267	112	4.48	140	4.48	4.48	4.48	4.48	4.48	4.48	45	46	4.48	2475	3510	3935	3757	3850	2441
5.96_1006.83				1006.83	ESI (+)	5.956	8226	8965	8117	7471	7737	6702	7466	7731	7794	7969	6774	7159	1621	1999	1693	1663	2336	2571	1647	1394	1521	1530	1120	1214	7987	7415	7416	7658	7731	7893
5.99_1034.86				1034.86	ESI (+)	5.986	4118	4759	4217	3187	3850	3631	3586	3972	3971	4056	3841	3950	1112	1355	1327	1336	1215	1458	550	501	644	719	335	632	3999	3857	3810	3851	3970	3915
6.00_660.54				660.543	ESI (+)	5.996	4933	2509	5089	1372	3705	6606	2051	3577	2245	2472	2707	2491	286	203	288	294	272	36	45	52	39	76	3.63	89	2215	2694	2810	5100	5075	4994
4.96_720.55				720.546	ESI (+)	4.957	5839	9476	9222	6517	7160	8552	6911	6183	7104	7221	7395	8286	247	4.46	333	595	610	194	87	121	134	100	89	45	9750	9538	9942	9729	9250	7519
5.11_676.48				676.48	ESI (+)	5.114	4918	4298	2816	1692	3735	4873	1604	938	3426	6748	5114	3737	3.4	45	3.4	3.4	34	52	41	35	52	3.4	3.4	98	5333	7453	7258	3233	1739	5144
5.72_736.58				736.575	ESI (+)	5.717	2503	3325	4230	2806	3580	4287	2349	2997	3217	2931	3441	3456	15654	17985	20981	21492	18924	19476	45	3.6	130	36	3.6	86	8673	10182	10596	10616	11610	11246
6.54_758.56				758.56	ESI (+)	6.536	10.65	10.65	10.65	1266	10.65	10.65	4195	4015	4140	4637	4022	4629	2132	975	1766	2365	2528	2737	10.65	10.65	10.65	10.65	107	10.65	10.65	4083	1826	5571	1783	1751
5.63_774.59				774.592	ESI (+)	5.632	57373	75250	94011	40776	77694	127094	47988	46413	63372	84393	65806	55957	4977	6183	7703	7588	6877	7155	2.89	65	32	2.89	29	102	51442	62265	56930	58756	61872	66576
5.89_772.57				772.573	ESI (+)	5.892	6140	51211	47429	25043	10062	62198	12774	20289	48528	57588	49997	48261	5.41	5.41	5.41	5.41	5.41	5.41	135	54	99	54	66	69	42606	39660	25370	22975	24780	11607
5.79_788.61				788.606	ESI (+)	5.787	16187	17818	19274	8992	17678	28095	6749	18788	24145	12986	28494	16306	2454	3229	3687	4750	3578	4802	93	104	198	155	107	147	7825	17343	18824	19243	20571	21774
4.52_782.56				782.556	ESI (+)	4.522	9048	8654	8104	3952	9346	14622	4044	5138	7023	7430	6754	6155	621	593	749	910	326	563	46	87	48	98	67	51	4614	4986	7630	7805	8187	9078
6.31_802.62				802.622	ESI (+)	6.309	16516	23027	18951	8716	16588	28402	9454	11251	15755	17950	18113	15282	987	687	1005	888	660	875	31	42	3.1	51	96	59	12404	13098	12776	13255	13700	14309
5.25_810.59				810.592	ESI (+)	5.255	5017	19404	14272	4651	5729	19182	11755	12834	17364	19637	16912	15566	41762	42716	47542	46332	43508	43703	6.94	131	69	6.94	80	101	13019	13227	13024	13185	13331	14267
5.11_822.59				822.589	ESI (+)	5.109	9242	10708	8406	3904	7792	14062	2559	2900	2743	2243	2519	2041	242	257	198	137	60	37	3.14	47	67	31	35	3.14	5120	5261	5468	5839	5998	6458
4.98_834.59				834.59	ESI (+)	4.984	2157	19958	10327	4779	7913	7351	8979	8230	14410	16066	13284	12899	9494	8417	8359	9307	10809	16493	98	5.65	68	60	95	57	12625	13283	13034	11993	6783	7320
10.63_866.75				866.745	ESI (+)	10.63	2670	3928	4142	3180	3163	4564	6643	6537	9979	6995	17480	12132	5.02	5.02	5.02	5.02	5.02	5.02	5.02	5.02	5.02	50	5.02	5.02	7963	6545	5485	9066	6075	4379
0.58_516.39				516.39	ESI (+)	0.576	17477	8963	7683	3598	4354	2678	2620	7343	3585	2991	3465	1832	60	26	34	73	148	184	499	551	321	472	653	500	409	671	31	2120	90	91
6.38_672.58				672.577	ESI (+)	6.381	42848	56858	37145	18686	34538	52225	10707	11464	15509	15399	15530	21272	4.48	53	4.48	4.48	4.48	4.48	45	107	101	51	4.48	57	34632	35018	36316	36076	37295	41347
7.06_700.61				700.609	ESI (+)	7.057	28514	40540	25581	12751	23128	36886	5099	5268	7997	8437	6805	8309	71	65	3.23	58	32	38	144	3.23	83	102	36	42	13838	14384	14379	14951	14835	15527
7.06_770.69				770.687	ESI (+)	7.061	23572	28702	20555	9985	19406	29455	1934	5017	6240	2705	4412	5664	74	93	3.92	40	3.92	3.92	60	39	115	3.92	52	50	12137	11796	11692	12956	13362	13419
1.12_544.34				544.339	ESI (+)	1.123	9076	9688	2770	4668	3353	7693	6350	4652	5956	7982	7897	11409	47	51	31	78	5	61	30	19	45	27	20	0.51	3484	3502	3874	3786	4150	4379
6.76_742.58				742.576	ESI (+)	6.761	9322	10802	6753	4428	5990	8446	2993	2730	3458	3408	3773	3663	81	3.69	175	37	116	256	3.69	3.69	210	3.69	93	90	5113	5110	5333	5038	5113	5708
5.54_718.57				718.569	ESI (+)	5.542	333.33	333.33	27171	333.33	33180	29887	14175	12509	18789	27542	24484	10255	333.33	333.33	333.33	333.33	333.33	333.33	333.33	333.33	333.33	333.33	333.33	333.33	21184	27139	21834	28209	29880	23534
7.40_766.57				766.573	ESI (+)	7.399	5394	6118	3925	2862	4250	5518	2955	3159	3750	3625	4030	3904	630	477	409	234	303	597	467	619	601	436	325	506	3483	4255	3903	4234	4391	4261
5.93_794.60				794.604	ESI (+)	5.927	8531	5368	6.28	193	6068	10492	3840	2036	8563	10200	12288	12666	16804	16533	17928	17433	16254	17748	107	63	212	6.28	119	106	3951	2453	1758	3882	1697	6778
2.50_482.32				482.325	ESI (+)	2.505	1099	291	319	804	6759	9538	161	10243	1760	990	18454	1655	41	56	3278	3205	2886	282	2.09	25	107	25	21	24	317	111	9405	9060	10097	1267
2.89_468.35				468.346	ESI (+)	2.89	83	1553	1098	133	558	846	7269	4915	7249	8442	8523	8425	8.31	8.31	8.31	8.31	108	8.31	8.31	8.31	8.31	8.31	8.31	8.31	4966	4817	4766	4251	3880	571
6.56_692.56				692.559	ESI (+)	6.562	437	625	581	622	442	569	5354	5630	8504	8706	8947	8502	84	58	50	11	1.06	91	74	62	1.06	1.06	35	1.06	4312	4193	4464	4544	4629	4709
7.02_706.57				706.574	ESI (+)	7.017	10075	12289	7899	3904	8315	12699	3593	3161	4710	5261	5191	5495	116	189	220	163	116	238	32	54	51	34	3.17	59	7468	7590	7238	7831	7285	7612
6.40_704.56				704.558	ESI (+)	6.396	6225	7197	6665	3860	6115	8585	11723	12110	14511	15275	17618	16024	408	485	432	406	534	214	31	98	114	59	26	118	10669	11602	11237	11536	11521	12370
6.54_730.58				730.576	ESI (+)	6.544	22117	27879	15038	9117	15036	21711	92074	99944	122625	125994	131043	125098	383	796	753	627	510	647	8.03	160	307	109	80	229	96092	99171	103173	105370	106877	110448
6.59_754.57				754.574	ESI (+)	6.592	33983	39133	26872	14652	26357	39754	46424	48717	60802	66753	60660	55261	1340	1284	1522	1212	1364	1211	66	166	114	44	86	131	35984	35534	37006	38000	38702	41808
5.84_750.54				750.544	ESI (+)	5.845	131482	153492	105957	58641	100957	158536	128065	150071	183032	193763	192117	179094	3991	3356	4284	4353	3139	4410	69	176	306	131	105	60	137624	142959	147002	154066	159112	168654
6.95_774.54				774.543	ESI (+)	6.945	7540	2182	4295	9105	8989	2198	6167	9316	10604	9602	9322	6301	2.63	2.63	2.63	2.63	2.63	2.63	26	153	66	71	103	102	8854	7262	9047	7503	8551	4360
8.33_814.67				814.67	ESI (+)	8.333	5197	8380	4162	3154	4453	5100	3440	3650	4518	3876	4814	2704	131	211	75	99	113	206	40	54	36	3.6	3.6	3.6	3518	3291	3496	3089	3605	3227
8.77_812.66				812.655	ESI (+)	8.774	103956	139195	116229	60628	96119	149223	32370	32394	43498	50985	45872	47594	165	196	143	420	187	145	51	3.19	47	32	113	133	55442	55527	55171	55438	56003	56112
5.69_688.50				688.502	ESI (+)	5.689	5422	3062	1117	1782	3425	4012	4266	4369	4311	4092	4777	4804	23	101	34	38	51	204	62	37	236	122	53	187	2543	2880	3095	3507	3938	4288
5.38_720.57				720.567	ESI (+)	5.383	59.9	59.9	1539	59.9	1081	1188	6114	3549	10496	14826	10215	9792	3662	3911	4315	4446	3933	4925	59.9	59.9	59.9	59.9	59.9	59.9	7856	6911	7459	8551	8428	11025
6.03_740.53				740.534	ESI (+)	6.032	5664	5889	7475	3845	6816	8235	2714	3370	3164	2895	3213	4030	4.63	4.63	4.63	4.63	4.63	4.63	4.63	147	4.63	93	46	105	4411	3508	4665	4760	4038	5380
5.74_762.61				762.607	ESI (+)	5.739	18878	20356	23842	14054	23868	32568	3790	6824	8878	7464	7478	5937	5.17	5.17	5.17	5.17	5.17	5.17	52	81	102	5.17	93	115	10399	9100	9958	12194	12814	13092
4.39_752.53				752.529	ESI (+)	4.386	6031	7465	6717	4783	5170	6444	4766	5100	5574	6256	5465	5599	714	1021	1509	428	1602	1143	2161	1031	2808	2747	2202	1873	6806	6265	6000	5980	6153	6596
6.07_770.57				770.574	ESI (+)	6.074	5741	7448	5117	2688	4656	6499	3865	3830	4744	5218	5762	5391	3.88	3.88	3.88	3.88	3.88	3.88	76	121	47	68	39	81	5269	5129	5321	5700	5730	6578
6.52_768.56				768.563	ESI (+)	6.522	25051	25951	5312	3638	29929	36653	6588	8080	8928	6715	12313	11681	8.99	8.99	8.99	8.99	8.99	172	158	113	217	90	181	107	6752	8185	10568	11144	9707	9140
6.06_766.54				766.543	ESI (+)	6.063	7123	8398	6402	3953	6397	8927	9941	10481	11481	11353	14590	11538	5.75	5.75	5.75	843	5.75	5.75	5.75	57	5.75	5.75	5.75	5.75	7927	9913	9601	9529	10647	10605
5.13_762.52				762.517	ESI (+)	5.127	3394	1179	1273	1308	1446	1636	5135	6213	6616	6584	7380	7266	2.54	52	120	46	31	2.54	52	85	25	2.54	2.54	40	4494	5005	5404	5253	6018	6001
5.93_780.57				780.568	ESI (+)	5.928	5554	8627	6114	4824	5581	8064	4551	3981	5626	5613	5938	6459	2290	2785	2708	3045	2525	3207	37	55	112	89	81	80	6185	6660	4314	4590	4283	5462
6.08_798.61				798.608	ESI (+)	6.084	9180	12513	8556	3874	8036	12983	4089	3898	5669	6745	5535	5192	1195	3.6	1794	3.6	696	1032	79	3.6	3.6	36	101	103	7173	7313	6687	6960	7067	8631
6.36_796.59				796.594	ESI (+)	6.362	7653	12975	11982	5156	11184	15662	3822	4182	6055	6881	6495	6283	6.58	6.58	6.58	6.58	6.58	6.58	66	116	123	111	110	6.58	6662	7135	7060	6942	7465	7920
4.95_790.55				790.547	ESI (+)	4.953	6843	9755	8007	3393	4611	7127	4334	2694	5525	6136	3897	5541	257	1053	1031	577	340	675	17.63	17.63	17.63	17.63	17.63	17.63	4932	2846	4111	4180	2356	6478
4.96_786.52				786.518	ESI (+)	4.965	12695	23617	22629	14509	18609	23420	9306	10683	13239	12922	14505	13282	3.17	3.17	3.17	3.17	3.17	3.17	32	3.17	77	97	152	98	15115	15636	17060	16150	16102	12209
6.55_810.61				810.608	ESI (+)	6.551	7350	9997	7877	3755	7402	10441	4139	5559	7456	7603	7748	7769	9409	7246	9534	9886	8245	8150	4.82	53	51	4.82	4.82	48	6088	5865	6249	6291	6488	7057
10.40_842.68				842.675	ESI (+)	10.398	1859	1809	1407	850	897	1309	4095	3862	3897	4216	4349	3438	2.88	54	2.88	111	113	68	47	2.88	29	70	61	2.88	3488	2953	3442	3448	3378	3976
5.67_838.64				838.641	ESI (+)	5.674	3657	11738	5099	2486	3932	20131	639	869	6100	10321	7010	3155	20447	10142	18556	3856	2920	4946	517	7669	125	592	948	2072	5864	3579	2439	3406	14149	5645
10.63_870.70				870.702	ESI (+)	10.632	194	175	499	282	489	3.07	6290	6028	6926	7469	7559	7226	5651	5487	5401	5173	5257	6383	47	127	31	3.07	43	41	3988	3893	3886	3952	3805	4505
4.68_692.52				692.521	ESI (+)	4.678	649	1070	943	585	730	537	3095	4010	5352	5612	5493	5170	2.8	2.8	2.8	2.8	2.8	2.8	52	28	30	2.8	38	2.8	3211	3478	3581	3884	3873	3887
4.89_706.54				706.538	ESI (+)	4.892	427	384	243	352	995	2797	6289	8306	12172	13172	10182	9282	52	3.03	3.03	81	3.03	3.03	60	56	76	30	3.03	3.03	3842	5072	5031	5655	5679	8946
4.69_738.51				738.505	ESI (+)	4.692	6493	7344	7484	4302	6600	9227	2993	2369	3615	4099	3294	3571	58	52	83	94	75	119	32	44	43	67	23	81	3341	3433	3556	3723	3743	4363
5.27_756.55				756.551	ESI (+)	5.273	6130	6344	7060	5482	6011	6740	6773	7161	7082	7304	8093	7801	3490	1694	2792	2487	3187	2685	2197	2552	3101	3275	3061	4099	8579	8786	8874	8963	8819	9807
5.17_754.54				754.535	ESI (+)	5.169	11642	6570	6951	3426	12340	17630	12404	16025	21255	21867	20943	19136	3991	4496	5534	5603	5254	5797	33	3.25	70	3.25	91	84	16027	18474	19823	19731	20120	15058
4.39_728.52				728.523	ESI (+)	4.393	5239	6111	8925	5231	6991	9886	3513	4047	4467	5077	4722	4143	260	87	133	360	237	124	66	5.46	55	163	61	91	6895	7495	8101	8552	8589	9919
5.53_770.57				770.567	ESI (+)	5.53	12041	13980	13545	6815	11235	15390	9767	10754	12963	14737	12028	10967	930	82	2.87	48	2.87	2.87	81	93	71	58	29	111	17647	17100	15698	15906	16749	19140
5.37_768.55				768.551	ESI (+)	5.369	3843	4861	4883	2660	4216	5600	5178	6709	8610	8441	8328	7500	13.38	860	13.38	13.38	13.38	13.38	213	134	262	236	348	160	5695	5977	6337	6634	7054	7447
4.74_766.54				766.537	ESI (+)	4.742	30725	33931	27286	14852	24652	35736	3925	4249	5167	6383	5452	4760	223	440	246	85	202	250	27	85	45	66	40	66	5976	6435	6370	6526	7130	8150
4.28_740.52				740.523	ESI (+)	4.278	12687	13568	28438	16080	23752	36402	2569	3372	4314	4881	4084	3147	6.23	132	62	6.23	91	124	120	76	6.23	80	193	6.23	7593	7842	8573	8416	8821	10298
4.63_782.57				782.565	ESI (+)	4.635	12252	12199	12917	6461	11602	17600	4352	5740	7140	8687	7095	6102	558	749	1275	1456	568	1467	51	53	217	5.12	153	70	8727	8649	8017	8428	8616	10936
5.28_780.55				780.552	ESI (+)	5.284	8241	9207	10398	7404	9749	10425	12426	13449	15817	15983	15946	16504	215475	219979	220122	215901	210179	206467	113	193	251	301	177	166	13816	14575	14554	15187	15034	16524
4.08_752.52				752.524	ESI (+)	4.075	10376	11786	17479	9481	15015	22018	1440	2421	2514	2880	2571	2296	31	49	53	61	3.06	41	34	67	3.06	52	144	63	4514	4957	4847	5309	5483	6139
4.28_752.52				752.523	ESI (+)	4.278	11873	18148	14288	7313	10183	15642	12332	9990	13897	17388	14328	14878	89	163	90	137	216	75	87	79	124	161	67	90	14346	13271	13487	13009	13048	12582
6.64_776.61				776.614	ESI (+)	6.645	1803	220	6.67	6.67	466	1314	1005	5175	6893	7678	7876	6736	226	119	145	287	195	257	6.67	6.67	6.67	73	67	78	6.67	4759	4769	4719	4714	5093
4.66_790.54				790.535	ESI (+)	4.664	5060	3327	2353	733	2913	3459	4798	6556	7930	7753	7107	6503	2.35	97	117	158	87	78	59	2.35	39	81	33	23	3779	4257	4595	4367	4304	4744
5.07_790.54				790.536	ESI (+)	5.068	255	4196	3218	857	1936	3299	1911	1850	1655	2833	1604	2423	2.77	2.77	2.77	2.77	2.77	2.77	2.77	43	2.77	52	28	2.77	3547	3391	3512	3683	4027	1481
4.67_768.55				768.554	ESI (+)	4.673	56143	17983	21020	9181	41859	61298	61681	80565	98223	106407	90133	81549	156	172	219	143	101	301	113	85	178	83	174	70	34050	37471	43162	48860	54841	48406
4.97_768.55				768.554	ESI (+)	4.971	35963	53458	58751	29450	42206	56802	17857	18107	23321	28595	20070	19907	11048	9040	8471	7308	5885	4672	112	174	216	8.23	82	223	33361	30656	28134	27829	26957	25676
4.62_766.54				766.537	ESI (+)	4.616	14244	18966	18294	8375	14312	20491	11088	13122	16520	19147	15855	14271	424	510	326	692	318	96	286	188	187	250	156	114	10632	9901	10100	10583	11658	14750
6.50_810.60				810.599	ESI (+)	6.495	7333	6906	5387	2441	7190	7703	4379	5515	4786	5166	5978	4932	11889	13497	15364	16037	13232	14382	56	41	51	81	4.11	52	5605	5865	6129	6291	6488	7089
5.58_788.61				788.61	ESI (+)	5.575	36812	68564	80868	35625	67401	108581	6.99	6.99	6.99	6.99	6.99	6.99	6.99	6.99	6.99	6.99	6.99	6.99	70	154	6.99	94	120	87	6895	4774	5147	3675	3231	7881
5.53_784.59				784.585	ESI (+)	5.527	113433	137374	115429	51082	98031	145210	51632	58247	78688	90380	81860	75093	303131	328371	321875	290333	258599	262225	114	3.71	62	112	37	104	83730	80723	81369	84967	89087	106556
5.21_804.55				804.553	ESI (+)	5.208	5293	6203	5418	3222	5021	7569	4083	5143	6371	6880	6333	5642	110886	129330	155843	154346	140983	148302	957	1036	1149	1080	1052	709	5570	5950	6348	6819	7078	7607
4.87_804.55				804.552	ESI (+)	4.868	12513	7432	6038	3090	12156	17998	6229	11027	14015	15096	14069	12637	3225	3790	5279	6435	6263	9869	881	975	1091	1128	920	841	9868	20054	20876	21716	21991	23640
5.26_782.57				782.57	ESI (+)	5.258	23951	52223	39898	21721	25052	31829	24608	21950	30954	37618	29670	32859	963433	910088	730306	703943	593430	501080	1038	904	813	524	514	849	36606	33922	30832	30245	25879	26632
4.91_802.53				802.534	ESI (+)	4.905	3545	4611	5343	2819	4560	4988	3870	4574	7112	8041	6964	6818	390	490	322	714	233	41	70	62	60	43	153	49	8070	8185	7511	6487	5711	3881
4.97_780.56				780.555	ESI (+)	4.975	18674	34290	29078	20642	21596	25482	26433	28977	35642	40000	40754	43332	30587	25769	25269	22763	19430	16882	116	91	103	60	63	182	43425	38760	35084	39475	36201	34290
4.30_800.52				800.52	ESI (+)	4.296	4930	4747	5699	3019	5777	9138	2925	4408	5107	4805	4806	4320	2.47	2.47	2.47	2.47	2.47	2.47	45	2.47	26	25	2.47	55	2914	3418	3868	3840	4337	5258
4.18_778.54				778.539	ESI (+)	4.183	33250	36362	30175	14747	33498	53379	6078	10048	11172	10409	12282	8763	38	85	87	114	3.78	3.78	57	63	97	52	82	78	12010	15771	15702	19606	20581	24360
3.97_776.52				776.522	ESI (+)	3.974	44092	47262	49139	22649	46963	72527	5840	8340	10770	10767	10518	9139	2.38	2.38	2.38	69	2.38	2.38	2.38	2.38	106	24	2.38	44	13312	14901	14754	16171	16751	20243
3.67_774.51				774.506	ESI (+)	3.668	15106	17414	27081	15406	22676	29505	1031	1317	1654	1854	2037	1529	2.71	2.71	2.71	2.71	2.71	2.71	29	2.71	46	2.71	2.71	27	5220	5291	5485	5403	5689	5915
6.52_826.63				826.627	ESI (+)	6.523	5065	7455	3984	1569	3726	5424	1764	1415	1130	3563	2398	2474	242	179	228	208	376	215	6.01	6.01	60	6.01	62	6.01	4234	3481	3820	4061	3819	4242
5.81_824.61				824.615	ESI (+)	5.807	24714	28927	20482	9282	22385	35583	4668	6358	8010	8302	6785	5894	5.89	398	1113	531	582	946	59	5.89	89	100	106	5.89	8951	9810	10858	11353	11703	13015
6.36_822.60				822.598	ESI (+)	6.357	10958	14052	10912	4571	10145	19814	5714	7151	9837	11283	11741	9462	3.78	3.78	3.78	3.78	3.78	3.78	78	3.78	38	78	60	3.78	7253	8265	8037	8172	8460	9107
6.12_800.62				800.617	ESI (+)	6.121	11627	14721	13510	7502	12319	18898	2000	2302	4150	3902	4018	3456	253	685	411	4.71	573	460	4.71	47	65	124	122	111	5215	6196	7668	7984	8029	7344
5.34_820.58				820.583	ESI (+)	5.343	140595	392639	195860	101017	142218	184693	161630	125938	198540	250888	209039	178098	6694	6414	7263	7109	6666	7080	6.18	131	214	72	62	92	212309	158512	148632	137499	117610	97677
5.82_798.60				798.602	ESI (+)	5.823	91606	139996	88306	32973	70504	127047	70179	79099	115273	133115	114980	121635	2603	5.5	5.5	5.5	5.5	5.5	73	68	5.5	55	77	108	117555	120480	125700	133596	130536	132503
5.52_796.59				796.585	ESI (+)	5.523	46566	68300	53171	25048	45341	64440	24158	27559	35636	43283	35432	31522	16740	17363	20761	20074	18271	20338	55	136	5.54	84	5.54	87	35813	34693	34100	34221	33898	36835
4.89_794.57				794.571	ESI (+)	4.892	308675	239198	266803	114648	358606	534079	144184	262457	327407	368471	328652	288322	152	205	377	604	293	1457	52	110	57	45	173	25	107289	195399	200510	209438	219637	241502
4.66_814.54				814.536	ESI (+)	4.66	84441	87970	90547	43575	95842	129603	55116	80983	90398	91323	89431	76667	143	1.78	1.78	18	98	1.78	1.78	78	53	125	63	1.78	60340	67615	75634	78261	81199	84951
4.89_814.54				814.536	ESI (+)	4.887	2363	3106	2413	1076	4591	4366	2992	3639	4186	4426	4019	3779	75	69	2.66	2.66	2.66	2.66	27	66	71	44	43	52	2824	3640	2756	3351	3436	4544
4.89_792.55				792.554	ESI (+)	4.888	31951	53092	46993	21130	38204	53175	31240	30863	41463	48296	39718	36958	305	137	321	339	291	343	87	57	92	98	91	52	37889	35846	34922	34696	32619	33012
4.16_790.54				790.537	ESI (+)	4.164	10159	10866	7965	4039	7992	12496	3978	4702	4973	5473	4860	3720	82	3.09	65	101	115	3.09	31	3.09	57	3.09	3.09	57	3531	3766	3949	4071	4410	4877
6.61_814.63				814.632	ESI (+)	6.609	23484	31972	21472	9942	21033	35764	5109	5914	8060	8716	9106	7935	11692	12709	13865	14464	12754	11670	175	91	139	166	109	119	11273	11860	12722	12708	13295	14089
5.95_812.62				812.616	ESI (+)	5.954	10371	13105	8246	3609	8045	12712	5546	7343	9597	9822	12084	10590	55910	51362	51138	47889	44529	46050	35	3.46	47	3.46	3.46	72	9864	10759	11947	12532	13318	14165
5.08_830.57				830.567	ESI (+)	5.085	11431	12352	8770	3441	9361	16890	9692	13169	17522	18298	19105	15666	3092	3577	3377	2756	1930	1911	3.81	84	3.81	38	3.81	61	7867	9328	9782	10286	10745	11991
5.41_830.57				830.567	ESI (+)	5.414	38210	41747	28659	14945	27957	36303	20463	28338	33912	33847	39988	36113	6662	7481	9353	9078	8499	9153	36	67	3.56	112	161	61	21371	24254	25900	26686	27651	27720
5.01_808.59				808.585	ESI (+)	5.015	129000	25775	20439	6829	42364	78263	19246	56336	47606	37449	44486	34474	80830	123622	207609	256972	279435	347529	49	159	125	103	145	124	20988	29237	17538	52177	74743	132285
4.29_804.55				804.554	ESI (+)	4.289	46366	50885	32232	16473	40749	61654	8566	16218	14165	13448	15340	12631	87.48	87.48	87.48	87.48	87.48	87.48	1171	1253	1033	1085	1142	969	11058	13495	13146	15797	18774	27302
3.79_822.50				822.504	ESI (+)	3.79	17443	15854	20010	7779	9979	18399	3065	4211	2010	3246	2211	1346	2.6	2.6	2.6	2.6	2.6	2.6	55	2.6	2.6	26	40	2.6	2272	3087	3319	3907	4131	5675
7.00_832.69				832.689	ESI (+)	7.005	7772	10126	6691	3655	6076	8523	2684	2776	3187	3796	3596	3579	286	3.78	3.78	3.78	75	151	54	52	3.78	3.78	38	56	5316	5244	5628	5943	5675	6397
6.34_826.63				826.635	ESI (+)	6.337	7452	9652	6025	2700	5620	8745	2258	2548	3120	3244	3591	3201	304	134	157	155	240	382	37	32	3.2	40	33	33	5513	7257	6993	6829	7143	7348
5.11_820.59				820.586	ESI (+)	5.11	55038	66556	49527	21154	47019	79590	7937	16374	17815	15181	13945	11111	94	196	164	448	177	54	45	120	124	131	39	58	29092	31745	33658	34373	35249	38896
5.53_820.58				820.584	ESI (+)	5.529	33339	41318	24891	11552	23656	30973	15912	16843	21333	25441	22365	20091	774	373	375	441	610	894	96	55	98	29	74	69	20089	19257	18329	17834	18871	21976
4.65_818.57				818.568	ESI (+)	4.65	14404	16368	10901	4191	9785	14626	3736	5174	5861	5738	5327	4883	36	91	71	79	2.63	2.63	99	2.63	35	32	26	2.63	4161	4377	5051	4877	5465	5973
3.97_848.52				848.52	ESI (+)	3.971	71295	69122	37258	15331	44844	79833	29196	53106	66518	57606	62307	54492	2.51	2.51	2.51	2.51	2.51	2.51	43	25	87	89	94	49	21236	28572	33165	35172	37903	42993
4.62_826.54				826.538	ESI (+)	4.621	4967	4998	3402	1385	3428	4891	2414	3382	4054	4322	3724	4184	3.21	3.21	3.21	3.21	3.21	3.21	52	32	37	36	67	34	2464	2716	3340	2936	3648	4757
5.62_836.62				836.616	ESI (+)	5.62	5550	5723	3692	329	4149	6358	1133	2076	2820	1908	3364	1698	3755	4889	6657	4839	10169	15997	3.55	48	36	3.55	3.55	3.55	3533	3138	2712	4232	4363	4727
5.12_832.58				832.585	ESI (+)	5.119	4290	8767	3745	1592	3356	5021	3572	3915	6356	8103	7233	6708	10945	11432	14424	14536	14241	14485	84	4	65	42	40	89	5576	5376	5403	4205	5197	5080
4.53_852.55				852.551	ESI (+)	4.529	16229	16233	8843	4033	10779	19867	8573	13762	18573	17829	15237	12707	2.39	2.39	2.39	2.39	2.39	2.39	2.39	2.39	2.39	52	24	49	6321	7479	8667	9264	9740	11809
4.28_850.53				850.535	ESI (+)	4.277	10205	9007	5193	2645	6336	10234	5006	7718	9124	8751	7931	6911	2.79	2.79	2.79	2.79	2.79	2.79	46	41	83	2.79	2.79	28	6236	5449	5446	6125	6801	8194
4.64_828.55				828.553	ESI (+)	4.636	14908	15501	10373	4714	10614	14461	10448	13970	16726	17637	15499	14333	3.04	3.04	3.04	3.04	3.04	3.04	30	49	49	36	31	50	10568	10865	11645	12482	12611	14053
4.90_854.57				854.567	ESI (+)	4.899	5948	2503	2263	202	4309	6845	1114	4688	3718	3956	6288	5627	3.74	75	3.74	3.74	3.74	95	3.74	3.74	37	3.74	41	44	1439	2313	6259	6301	6386	6956
7.27_866.70				866.704	ESI (+)	7.266	8815	15177	16846	5116	5656	16725	4213	5015	3781	5739	5661	8921	49	68	99	111	2.74	103	27	2.74	123	108	185	94	8208	7650	6716	6319	5650	5280
2.50_524.37				524.371	ESI (+)	2.501	1499	5398	3816	2824	3802	4860	4456	3075	4231	5673	6426	6008	235134	248340	272863	268880	123522	46959	130	88	466	256	100	53	4091	4237	4145	4259	4548	1556
2.33_536.37				536.374	ESI (+)	2.329	2868	8768	5688	4242	6247	9098	7579	5881	8543	9661	10249	10352	192	67	106	60	77	68	17	108	46	34	1.72	95	6575	6973	6988	6938	6771	2489
4.90_688.49				688.491	ESI (+)	4.904	3235	5928	7094	3876	4099	5694	1655	2432	3132	2032	2304	3788	49	60	44	35	66	194	34	69	84	3.38	3.38	3.38	8969	7946	7250	6435	6433	7029
5.40_728.52				728.521	ESI (+)	5.398	3668	6436	7443	3900	5564	8061	4921	4760	5613	6465	5837	4969	164	212	8.54	148	175	8.54	99	124	157	176	85	94	6779	6204	5935	6390	5712	5297
6.10_706.54				706.538	ESI (+)	6.099	3297	3841	3508	2080	2559	3900	16956	18115	23909	25198	26102	24950	150	80	42	60	3.05	166	59	31	3.05	42	3.05	123	12439	12446	12426	13152	13834	14755
6.46_690.54				690.544	ESI (+)	6.456	1371	1492	1227	901	985	1192	4265	4167	6576	5750	6951	7857	124	82	70	49	4.95	139	148	99	4.95	73	119	67	4991	5260	4953	5712	5837	5891
5.13_702.51				702.508	ESI (+)	5.127	7964	9562	14169	8405	12633	17261	17216	18406	21257	23286	23669	21506	3.39	3.39	3.39	3.39	34	3.39	46	107	45	38	63	73	15705	15933	16364	16295	16600	18402
5.55_716.52				716.524	ESI (+)	5.551	86165	108654	161366	85224	142787	215527	93640	106546	125195	136217	128758	115526	6.44	6.44	6.44	6.44	6.44	6.44	6.44	64	440	89	251	486	133468	138714	141374	143599	144850	150169
5.08_714.51				714.507	ESI (+)	5.077	5504	6592	11539	7427	9712	13221	14340	16305	18249	19468	20406	18187	3.3	72	130	33	3.3	151	3.3	52	37	77	34	60	23165	22470	23516	23856	25084	26872
6.24_732.55				732.554	ESI (+)	6.242	36614	43907	46044	26596	37319	54076	11535	12382	14216	15059	16566	15304	6.04	6.04	6.04	81	6.04	6.04	60	121	124	86	220	109	16850	17072	16553	16834	17297	18427
6.85_718.57				718.575	ESI (+)	6.852	43027	54016	35006	20829	34034	50223	60342	65942	76873	83030	83909	76683	271	173	203	230	167	251	116	242	481	252	286	298	64585	66383	66997	67520	69287	70926
5.66_752.52				752.519	ESI (+)	5.655	276	3.42	232	649	455	386	1531	2916	1932	2571	3058	2357	119	3.42	3.42	3.42	3.42	3.42	3.42	3.42	107	42	34	3.42	3504	3588	3570	3526	3760	4382
5.24_730.54				730.539	ESI (+)	5.243	6480	7077	10768	6070	10355	14127	4061	4648	4674	4965	5496	4383	5.36	5.36	5.36	5.36	5.36	5.36	146	317	135	290	230	54	5532	5136	5766	5608	5472	6145
6.74_716.56				716.56	ESI (+)	6.739	156763	197970	137544	77791	135048	197108	53186	55321	67157	70353	71254	68636	165	63	91	103	141	90	30	138	171	66	211	116	102745	105255	106276	108328	109791	113301
6.09_714.55				714.545	ESI (+)	6.093	4831	5790	4139	2524	3726	5120	1875	2029	2191	2256	2387	2063	257	358	323	308	253	255	129	61	45	4.45	95	59	3154	3005	2958	3085	3253	3452
7.79_750.41				750.407	ESI (+)	7.789	6440	171	28	432	5092	5396	324	4846	537	231	482	834	26	115	39	498	537	364	250	90	217	2038	1766	2164	426	813	788	7008	7082	7117
5.26_744.55				744.554	ESI (+)	5.263	28284	31396	29557	14825	25791	36882	6245	6488	8008	9226	7335	7237	1977	1485	1608	1519	993	1113	124	47	155	83	309	78	12441	11209	10952	11120	11435	13542
6.21_744.55				744.554	ESI (+)	6.212	65978	81026	76374	43700	73006	104228	43391	45656	51127	57838	60198	54094	7.34	7.34	7.34	7.34	7.34	7.34	96	73	116	148	176	299	58940	58914	58806	59929	60067	64816
4.97_742.54				742.537	ESI (+)	4.969	5717	6293	7578	4501	6087	8068	1060	2287	1865	2383	2267	1806	1885	2606	3203	2777	2848	2736	6.69	6.69	6.69	67	6.69	6.69	3468	3177	3405	3995	4309	5179
5.05_740.52				740.523	ESI (+)	5.05	8650	13176	11552	6117	8603	12725	5170	4244	5887	6874	7042	6629	4.51	4.51	4.51	4.51	4.51	4.51	4.51	123	99	70	75	45	8330	7841	7308	7091	6120	7651
5.42_738.51				738.506	ESI (+)	5.419	2808	2705	3065	1908	2217	3225	7710	8737	9470	9628	9926	9371	535	927	369	736	580	694	45	68	89	85	134	59	6976	7370	7482	7831	8467	7989
6.11_782.57				782.567	ESI (+)	6.112	16399	18479	12336	8686	11485	14955	10750	12145	12418	13992	12273	12121	6617	6626	6646	6970	6820	7686	203	494	46	797	1055	73	9647	8962	9153	9963	10236	10008
7.51_746.61				746.606	ESI (+)	7.509	7283	9347	5195	3181	5196	7084	14210	15156	18263	19807	19645	17517	112	87	74	50	174	104	34	3.38	194	62	73	3.38	12392	12417	13057	12757	13207	12955
6.26_758.57				758.57	ESI (+)	6.258	9015	10306	10158	5471	8555	12958	3331	3490	4024	4296	4530	4306	6097	5270	5359	5205	4701	5515	15	36	136	52	49	1.54	5217	5367	5299	5432	5441	5945
7.26_744.59				744.592	ESI (+)	7.261	8790	10963	8196	4663	6833	9686	4562	4482	5482	5880	6003	5319	160	190	141	49	149	162	65	111	35	55	74	86	6798	6962	7258	7205	6976	7320
5.92_778.54				778.537	ESI (+)	5.915	3058	3390	2384	1553	2381	1615	1814	2778	3003	3257	3434	2996	2.88	2.88	2.88	2.88	206	177	2.88	29	52	2.88	30	2.88	2874	3038	3049	3174	3193	3291
5.56_756.55				756.553	ESI (+)	5.562	6173	7822	5449	3421	4869	6875	3199	3504	4213	4816	4155	3682	130	269	131	72	366	412	113	103	36	49	94	104	4419	4378	4631	4702	4645	4921
4.96_754.54				754.537	ESI (+)	4.963	5427	2616	3242	1989	3891	5575	2548	8570	5085	3254	5802	5039	1105	1437	1029	1296	1003	1123	6.69	130	182	91	67	109	2763	3151	3822	5366	6282	8242
5.42_754.54				754.537	ESI (+)	5.42	31961	12470	12315	6543	14440	18731	21131	23874	27475	30908	27579	25109	180	4.08	4.08	4.08	4.08	4.08	47	92	71	41	41	45	16363	16319	16962	16817	17640	18553
4.99_752.52				752.522	ESI (+)	4.987	31054	12042	11987	6985	21523	28052	23893	58866	33497	33643	37986	30857	5.91	5.91	5.91	5.91	5.91	5.91	93	59	138	176	162	97	14260	15300	18528	25412	33823	47468
4.77_750.51				750.508	ESI (+)	4.773	43846	47523	51085	28697	48213	72042	17577	21667	23313	25595	25042	24144	4	4	4	4	4	4	106	46	46	84	40	4	27883	28277	29484	29490	31251	34418
6.76_776.62				776.615	ESI (+)	6.756	4345	5603	4129	2363	3876	6449	4351	3239	4543	5042	4754	4124	334	274	288	357	271	200	69	35	46	81	38	3.46	3616	3981	3182	3583	3542	3677
6.37_760.62				760.621	ESI (+)	6.368	13025	22360	16748	7910	12420	25677	3.69	2684	3606	4067	3397	3786	3.69	3.69	14179	12792	3.69	13998	100	3.69	45	37	70	3.69	8830	8899	9295	10665	7904	12164
6.10_772.59				772.585	ESI (+)	6.1	6971	9408	8769	4678	8257	12212	5853	6015	7898	8999	8282	7551	5.89	5.89	5.89	5.89	5.89	1136	81	73	59	5.89	5.89	64	7844	7142	7221	6943	7619	9070
6.26_792.55				792.552	ESI (+)	6.262	7865	8170	6622	3913	6479	7596	6646	5518	8256	9028	7954	7284	4.28	4.28	4.28	4.28	4.28	4.28	50	43	50	60	68	62	4050	4797	4929	4810	4772	5344
5.72_770.57				770.569	ESI (+)	5.721	9304	10939	9255	5884	8892	10254	7665	8786	9776	10624	8040	7839	20.35	20.35	20.35	20.35	20.35	20.35	487	204	728	401	933	443	11117	10961	10837	10995	11862	12732
5.28_768.55				768.555	ESI (+)	5.284	4941	6141	5401	3797	4592	5600	4074	3666	4651	4949	4555	4742	637	860	63.66	63.66	63.66	63.66	1033	1071	1282	1469	1415	1472	4547	4557	4128	3959	4572	4571
4.97_766.54				766.538	ESI (+)	4.975	16298	33989	35563	21328	26558	38211	19310	21974	30468	30163	31170	30355	2559	4160	1779	3416	1148	575	6.39	113	142	73	69	64	26311	29228	30969	30377	28103	22793
5.95_766.54				766.538	ESI (+)	5.946	10696	11074	12598	8049	11865	14974	5483	6362	6469	6837	8638	8277	5.58	5.58	5.58	5.58	5.58	5.58	209	143	227	101	5.58	56	6128	6307	6926	6658	6973	7582
5.47_764.52				764.522	ESI (+)	5.467	2665	4.97	4.97	1301	2177	3655	3655	4677	4921	4913	5627	5375	170	155	4.97	4.97	228	179	4.97	53	69	50	4.97	4.97	4387	4975	5116	5092	4675	4940
6.22_808.58				808.583	ESI (+)	6.216	7449	8767	7533	3370	6730	11581	3141	3076	3679	4294	4058	3334	4911	4064	4523	4380	3966	4473	3.36	34	63	53	78	42	3915	4014	4487	4878	4207	5856
6.37_786.60				786.601	ESI (+)	6.372	21641	28975	26682	11155	21801	32647	8951	9993	12793	15718	14420	12496	5.06	5.06	5.06	5.06	5.06	5.06	100	60	83	64	51	120	15186	14650	13907	14311	15415	18169
7.09_786.60				786.601	ESI (+)	7.087	5511	6501	4501	2203	4262	5684	1917	1878	2752	2742	3013	2551	2941	2824	2749	1558	2373	2563	55	42	45	80	66	84	3633	3482	3716	3651	3777	3989
6.40_784.58				784.584	ESI (+)	6.4	3088	3722	3307	1512	2857	4299	1764	1811	3261	3240	3557	2919	2535	2777	3271	3365	2901	3140	82	59	130	105	85	55	3414	4064	4232	4502	4914	4764
5.79_782.57				782.569	ESI (+)	5.794	11774	11712	15281	8775	13522	19254	9134	14782	17726	17078	19745	17424	105228	120294	135429	136119	124661	126325	110	144	4.43	97	44	99	13061	15344	17203	18592	19054	21207
5.24_780.55				780.553	ESI (+)	5.237	11127	12073	13200	7404	9749	12401	9491	13449	15817	14037	15946	16504	63525	72076	97284	124640	210179	206467	16.62	193	349	301	177	166	10844	12141	12439	15187	15034	16524
5.54_780.55				780.553	ESI (+)	5.538	23819	29403	35854	24447	28823	32001	11745	12725	16370	18775	17473	15200	7517	7854	8800	8777	7372	8326	117	138	3.03	87	3.03	30	24255	26429	23838	23563	23618	22512
6.87_766.57				766.574	ESI (+)	6.869	3900	4328	3104	2461	3009	3670	3003	3073	3763	3803	3817	3755	651	857	693	961	718	807	607	874	786	902	678	689	3286	3881	3579	3908	3616	3997
4.77_778.54				778.538	ESI (+)	4.768	4591	5445	5920	2451	5328	7002	4753	6289	6433	7033	8384	7587	1047	922	989	1120	1088	1413	70	31	33	84	200	43	5527	6136	6164	6435	7264	8238
6.53_800.62				800.616	ESI (+)	6.53	14965	19511	15394	7355	12668	18644	9872	11245	14692	16671	15344	14001	1045	65	636	631	696	660	58	101	128	71	48	126	13698	12350	12675	12537	12809	14880
6.61_786.63				786.633	ESI (+)	6.605	12105	15898	10771	5329	8431	13134	10223	8808	13497	17618	13474	14608	3233	1760	3801	1703	4485	3.1	31	72	50	40	41	108	15704	11533	14396	11656	15683	13390
5.71_796.58				796.584	ESI (+)	5.71	25228	27909	22693	17748	21756	23917	16471	19184	19046	20761	18187	18860	264.03	264.03	264.03	264.03	264.03	3167	264.03	2640	264.03	5428	7726	8315	19085	18087	17655	18468	18863	21462
6.48_796.59				796.588	ESI (+)	6.479	8430	4782	6244	3885	7305	7119	6340	6811	8774	9360	8380	5608	4.1	4.1	4.1	4.1	4.1	4.1	88	69	41	97	83	96	5593	5728	5931	5927	6247	6760
5.55_792.56				792.557	ESI (+)	5.551	9650	11020	10248	5415	9339	13003	5060	5659	6656	7512	6773	6331	3.03	3.03	3.03	3.03	3.03	3.03	30	55	81	130	71	37	7139	7178	7063	7291	7501	8725
6.76_814.63				814.633	ESI (+)	6.759	31157	41688	27252	13436	26596	43249	8186	9349	11620	13905	13563	12108	4118	2972	1945	3217	2927	2776	3.81	38	53	53	42	116	15464	17087	17452	17965	17850	18054
5.94_808.58				808.585	ESI (+)	5.941	12325	14099	12354	4775	11476	18726	8094	11819	15022	15678	17708	15197	155553	175525	194560	194641	182940	184552	119	84	115	24	145	77	10124	11147	12199	13027	13676	14505
5.83_794.61				794.606	ESI (+)	5.835	4000	2.81	2.81	2.81	2.81	2.81	13144	2.81	23927	23913	27093	24172	25190	21839	21873	21018	19148	18857	36	28	55	55	32	55	3347	14858	2.81	2.81	2.81	2.81
7.54_794.61				794.609	ESI (+)	7.541	26514	17277	18082	7837	20777	31085	4307	7431	6417	5088	7600	5898	111	102	73	158	56	125	65	80	97	49	4.87	83	9338	9655	11232	12088	12993	14955
5.48_806.57				806.568	ESI (+)	5.484	13287	15292	12964	5088	11744	14724	6968	10580	12737	11878	12762	12542	39243	46565	57267	57596	52416	54813	85	45	87	4.5	114	81	9656	11824	11623	12064	13510	14473
5.03_804.55				804.553	ESI (+)	5.034	11794	7797	8128	3789	7063	11715	7041	11453	12238	11853	13693	12275	4523	5681	5922	6143	4747	4332	1215	819	999	1020	1007	219	8049	9440	10111	10613	10329	9714
4.64_802.54				802.538	ESI (+)	4.636	7290	7806	7354	3760	7223	10792	3386	4756	5269	5875	5209	4532	2.43	2.43	2.43	288	167	2.43	42	79	80	51	24	26	4669	5212	5071	5561	6000	7067
5.72_820.59				820.587	ESI (+)	5.716	17894	22118	14244	8646	13442	16859	11474	11851	13610	15168	13730	14497	4.08	4.08	4.08	4.08	4.08	4.08	41	128	90	51	57	110	12876	13070	12150	12082	12720	14258
5.84_832.58				832.585	ESI (+)	5.844	5255	5141	3430	979	3418	5392	2223	3683	4228	4295	4091	3718	68083	77112	89511	87687	80019	81895	3.16	65	67	34	32	3.16	2450	3055	2972	3197	3453	4092
5.68_844.59				844.586	ESI (+)	5.683	7564	7949	4888	2647	5429	7731	4317	4723	5677	6375	5956	5092	104	287	173	352	35	3.38	3.38	77	34	95	3.38	39	4417	5068	5297	4993	5457	5450
9.87_874.76				874.762	ESI (+)	9.868	3.2	421	491	384	665	3.2	3.2	3.2	3.2	3.2	1308	3.2	381	486	443	371	360	434	50	32	57	48	68	3.2	4793	4734	5574	5484	4508	3068
10.34_912.78				912.784	ESI (+)	10.341	3108	4352	3908	2228	2811	3308	21547	18709	23498	26793	31586	28425	450	1027	2.9	1145	533	2.9	75	96	29	48	35	34	8262	7449	7969	7943	7636	6779
10.69_926.80				926.802	ESI (+)	10.693	5439	8398	6470	3221	3293	6116	33070	29026	37034	41351	50463	44778	10695	9956	8943	10698	5550	2062	3.84	3.84	38	66	77	81	12412	15901	14243	15224	12038	11282
5.71_1455.07				1455.07	ESI (+)	5.714	13569	14925	17951	11312	15736	18866	9301	12409	13089	13426	12662	13200	42	3.11	3.11	3.11	3.11	3.11	3.11	3.11	101	79	31	86	20852	21772	21938	22717	24928	29491
5.55_776.54				776.544	ESI (+)	5.551	4.68	4.68	4.68	4.68	4.68	4.68	5894	6511	7631	8303	9579	8132	219	348	666	302	235	4.68	58	78	47	70	70	107	7818	8734	8829	8923	9471	9072
5.19_812.55				812.545	ESI (+)	5.193	13201	15430	10360	6125	10691	15685	6187	7098	9163	9209	9154	9102	469	462	5.55	5.55	5.55	5.55	87	5.55	56	73	57	238	8254	8370	8898	8664	9237	9529
4.79_810.53				810.528	ESI (+)	4.793	138960	168758	120963	63504	120121	178624	52309	63193	74704	79407	95413	90847	3.26	3.26	3.26	3.26	3.26	3.26	33	111	212	64	169	87	73330	78096	82536	84139	84785	86749
0.78_290.27				290.269	ESI (+)	0.777	20804	29886	1512	3550	5394	9927	2092	860	1148	991	11810	982	837	834	969	781	724	671	889	954	1476	1925	1271	1130	4721	4787	4690	4562	4685	4847
4.54_897.55				897.549	ESI (+)	4.542	7821	8286	5444	3213	5525	7462	5215	6303	6928	7478	7361	6460	3.27	3.27	53	43	3.27	3.27	33	46	3.27	33	3.27	3.27	6230	6398	6539	6778	6725	7436
4.68_929.51				929.512	ESI (+)	4.681	5482	5801	5519	5671	5708	5234	5635	5870	5553	5335	6269	6087	47	83	46	134	100	61	54	51	45	3.7	37	58	6055	6137	6503	6425	6250	1840
5.27_858.55				858.546	ESI (+)	5.271	5335	5562	4089	2469	4052	5685	3376	3360	4018	4458	4539	3933	253	24.44	244	24.44	24.44	24.44	24.44	24.44	24.44	24.44	24.44	24.44	3581	3419	3997	3792	3400	4584
4.24_782.50				782.496	ESI (+)	4.237	7166	9698	10249	6483	8763	12121	7011	7179	9915	10194	10546	10537	3.17	3.17	3.17	3.17	3.17	3.17	71	55	3.17	32	42	60	11706	11978	12691	12754	12714	13188
5.50_838.56				838.558	ESI (+)	5.501	7701	11814	6176	3724	6326	9520	2520	3527	4835	3466	5394	4809	3.56	3.56	3.56	3.56	3.56	3.56	36	61	93	97	89	50	5350	4254	6663	4958	4827	6741
5.41_838.56				838.558	ESI (+)	5.411	23244	30480	21140	4595	21090	29202	7949	8553	11319	12469	12980	11970	2.78	2.78	2.78	2.78	2.78	2.78	53	162	28	2.78	138	89	14269	14560	15071	14975	15498	14922
6.07_866.59				866.587	ESI (+)	6.071	9242	13037	7924	4309	8506	12725	2746	2844	3969	4269	4281	3839	3.61	3.61	3.61	3.61	3.61	3.61	36	39	128	3.61	81	3.61	7374	7441	7609	7304	7487	6713
6.23_767.56				767.562	ESI (+)	6.228	4751	5739	5777	3530	5213	6991	3561	4688	4385	4133	6393	5322	212	88	8.79	8.79	469	313	8.79	8.79	8.79	8.79	8.79	8.79	5222	5874	4123	2848	3538	5338
6.60_768.58				768.583	ESI (+)	6.599	14611	8429	14561	6544	12156	17613	2897	3083	3227	5686	4618	3945	578	899	780	815	514	959	133	69	116	69	40	60	2993	3462	3994	4	4209	3840
5.71_769.57				769.568	ESI (+)	5.715	11295	16963	13067	8422	11510	12958	6576	7353	7809	8602	7680	7801	50.66	50.66	50.66	50.66	50.66	50.66	754	830	507	865	1692	1805	9126	8759	8590	8941	8776	9554
5.33_771.56				771.565	ESI (+)	5.332	15847	23277	20951	7712	15292	12902	33484	7953	16627	27861	18646	15434	2022	1619	570	1123	1567	930	115	127	297	121	384	156	29474	26614	22661	22382	21125	18762
5.24_771.57				771.573	ESI (+)	5.242	46129	75729	65052	30372	51651	67972	53437	53820	71825	90415	60447	56768	2833	2776	2269	2127	2242	2671	21	358	121	298	239	346	88240	82876	76390	75825	69133	71548
6.93_774.57				774.571	ESI (+)	6.932	2734	8.47	10797	2833	9307	5386	2852	2440	4929	2855	2571	8.47	8.47	8.47	8.47	8.47	8.47	8.47	89	96	101	85	95	126	7792	6592	5709	7900	4311	4642
6.95_775.54				775.542	ESI (+)	6.948	3038	3.5	1291	3690	2945	1433	4931	4910	4821	3641	3596	3990	3.5	3.5	146	3.5	3.5	3.5	52	54	60	35	45	57	3573	4957	3940	4392	4085	3181
5.74_775.55				775.555	ESI (+)	5.741	1719	9.39	9.39	9672	9.39	9.39	4337	10908	2153	958	2460	10543	1213	2182	9.39	2069	1565	1657	9.39	9.39	9.39	9.39	9.39	9.39	9.39	925	1701	6424	11126	9.39
6.90_775.65				775.65	ESI (+)	6.897	787	3975	1299	1178	0.71	4179	4363	4125	5982	5940	9273	7934	36	315	566	609	216	761	53	63	46	7	44	116	2401	1886	2757	3323	2775	1491
6.56_776.58				776.576	ESI (+)	6.56	3833	4.08	4.08	1998	4393	1510	1486	7483	2471	2020	1607	4113	167	140	267	126	4.08	135	88	91	64	41	4.08	43	3508	3520	4344	2158	5605	6501
5.29_781.56				781.555	ESI (+)	5.287	3709	5980	6580	4325	4652	5446	7078	7267	8488	9646	8678	9190	99932	102618	102708	99965	97488	96855	2579	1500	1319	1212	1102	925	8277	8269	8053	7673	7737	8679
6.14_783.52				783.525	ESI (+)	6.142	6681	7483	8514	9340	6330	1351	10419	9424	9750	8816	7025	9745	6347	5599	4976	4832	5583	3610	293	520	26.19	26.19	26.19	262	9275	9129	9184	9240	8851	8684
6.07_783.57				783.571	ESI (+)	6.073	6272	6869	3225	1860	4319	4993	3168	3978	4589	5708	5417	4356	1391	1018	1213	2026	2392	2659	53	43	41	100	66	49	2053	2911	3259	3119	3060	3824
5.57_789.61				789.611	ESI (+)	5.569	22405	28023	42970	13335	34009	53849	3.89	3.89	3.89	3.89	3.89	3.89	3.89	3.89	3.89	3.89	3.89	3.89	65	54	87	39	52	48	3.89	2668	2708	2954	5140	4198
6.27_791.67				791.666	ESI (+)	6.268	2372	6859	1567	1060	1125	3589	3548	4177	6941	5910	3570	4184	3.14	58	3.14	3.14	55	186	37	3.14	58	31	84	37	5878	4954	9258	6790	5304	5367
5.80_794.60				794.595	ESI (+)	5.801	19138	18259	9500	4546	10631	24315	13144	20690	23927	23913	27093	24172	13235	7515	23743	7785	21446	10306	92	28	37	2.81	93	67	3929	14858	16610	17597	19059	22900
4.51_796.51				796.514	ESI (+)	4.514	9814	11216	9417	5606	8847	11842	4071	4748	5358	5171	5564	5976	4.48	4.48	4.48	4.48	52	4.48	54	52	49	4.48	45	51	4969	5547	5233	5467	5546	6045
5.71_797.59				797.591	ESI (+)	5.715	10388	12451	10063	7462	9710	10410	6972	7860	7905	8776	8147	7732	3903	3728	4042	3257	2405	3318	413	41.34	1010	891	1025	2619	8065	7792	6900	7679	7508	8407
5.78_799.60				799.602	ESI (+)	5.783	73249	71380	46953	25381	61757	92580	36098	67000	74672	68312	74676	62916	3676	4346	4965	4658	4181	5347	46	51	51	37	45	48	59466	75081	86689	95452	100593	103962
4.88_805.56				805.555	ESI (+)	4.878	6018	4251	3235	1628	6212	9090	4189	5486	7133	7286	6784	6299	1808	2590	3413	3595	3499	4030	354	292	332	291	280	228	9311	9761	10211	10668	10984	11461
5.53_807.57				807.57	ESI (+)	5.528	7078	8227	6933	4167	6468	7808	4810	5562	6716	7493	6975	6549	9935	11830	12459	10752	10031	10173	77	7.66	253	104	189	182	5803	6034	6197	6134	6404	7532
5.72_807.59				807.589	ESI (+)	5.721	2531	4713	3765	2309	3193	3394	3382	3787	4538	5519	4894	4983	808	2434	3819	3597	1981	3214	89	105	4.93	49	4.93	109	4122	4660	3171	4053	4021	4472
5.25_809.59				809.59	ESI (+)	5.252	39343	51861	35680	17798	31198	45469	38527	40810	57068	63877	54129	48357	144343	148232	165964	159864	145931	151911	81	8.07	119	8.07	8.07	8.07	41554	40940	41324	40994	41827	43383
4.99_810.56				810.564	ESI (+)	4.991	28685	9402	4509	3465	5164	12784	1422	2080	5578	4703	4164	3923	3237	3186	3377	1881	2567	825	77	170	345	109	244	74	4381	5172	5681	4382	3672	18071
6.54_811.62				811.615	ESI (+)	6.542	5729	6826	5425	2482	5126	6824	3229	4067	5581	5607	6169	5368	4.4	4.4	4.4	4.4	4.4	4.4	4.4	44	74	4.4	73	4.4	4016	4526	4436	4980	5036	5818
7.29_814.68				814.676	ESI (+)	7.293	4586	5512	3884	2525	3977	5285	7001	7690	9660	10316	9588	9368	5781	2153	2759	2043	3739	2794	3.18	36	32	32	3.18	60	6401	7248	6823	7128	6996	7785
6.74_815.64				815.637	ESI (+)	6.738	16862	21591	14115	7252	13301	22755	4389	5042	6074	7290	7534	6333	2973	2407	2711	2337	1997	1819	87	2.11	30	28	21	2.11	8708	8960	9415	9282	9858	9514
5.43_816.62				816.619	ESI (+)	5.426	7271	8856	10255	7775	8648	9614	3821	4169	4975	5248	4679	4780	7171	6600	6764	6025	5654	5316	3.7	37	47	57	56	54	6589	6680	6335	6469	6235	6394
4.89_817.55				817.554	ESI (+)	4.893	13725	14574	14331	5960	15361	22655	7765	11692	13752	13920	14438	12077	206	97	79	83	148	321	63	3.83	56	3.83	3.83	38	7199	8443	9289	9346	9965	10483
10.47_823.76				823.758	ESI (+)	10.475	721	155	865	729	423	372	24952	24320	31774	35664	38848	34339	129	68	173	156	291	205	70	64	97	54	35	166	10356	10398	9943	10245	10378	9974
5.10_824.55				824.547	ESI (+)	5.101	9241	11565	7524	3788	7164	10041	1534	1893	2725	3061	3045	2706	70	42	256	114	58	75	35	27	44	90	58	36	3184	3377	3729	3673	3593	4004
4.67_829.55				829.555	ESI (+)	4.669	4576	8733	5808	2666	6342	8036	5671	7329	9068	9188	8314	7728	0.79	0.79	0.79	0.79	0.79	0.79	8	0.79	0.79	80	0.79	47	5477	5774	6157	6579	6904	3931
4.17_831.56				831.564	ESI (+)	4.173	8804	9940	6072	3286	6599	11170	7486	10285	12434	13575	12171	10976	220	178	79	135	85	381	168	80	71	124	69	293	4473	4450	4862	4718	5443	6296
7.41_831.70				831.696	ESI (+)	7.408	3568	4782	3288	1844	2884	4410	3487	3639	4876	4958	5098	4719	220	87	245	189	169	148	103	32	64	49	45	3.15	3338	3564	3341	3408	3645	3337
6.93_831.70				831.695	ESI (+)	6.929	6384	8749	6006	3520	5937	8815	4689	4559	6300	6353	7300	7440	156	221	149	113	78	119	37	47	44	95	35	36	5934	6428	6351	6276	6508	6213
4.91_833.58				833.579	ESI (+)	4.911	27398	56260	15738	14425	18176	32182	13411	20035	36064	21633	23391	24936	250	514	1170	3747	2734	1504	109	47	96	25	98	41	26005	13072	37617	24502	32443	28402
8.81_833.59				833.586	ESI (+)	8.808	7589	7520	7041	4451	5893	7624	2573	2819	3293	3790	3451	3397	102	70	4.84	48	56	56	56	56	50	4.84	56	4.84	3878	3980	4210	4153	4167	4714
7.04_833.71				833.711	ESI (+)	7.035	1755	1295	2.63	457	934	1553	3804	4407	4964	5434	5976	5402	2.63	56	2.63	2.63	2.63	92	2.63	2.63	26	98	36	35	3265	3707	3413	4434	3921	4218
7.18_836.66				836.656	ESI (+)	7.181	4578	5460	3784	2101	3453	4669	3417	3854	5151	5520	5058	4364	1002	2.62	631	1092	515	2.62	62	2.62	42	54	26	49	3102	3582	3604	3754	3995	4168
7.29_836.66				836.66	ESI (+)	7.291	10320	11445	8975	5211	8277	12039	15919	17006	22573	24202	23618	21330	1341	495	586	890	463	922	70	28	68	37	28	2.75	14148	15419	16402	16526	17413	18253
5.85_837.64				837.637	ESI (+)	5.846	4628	5253	3384	1546	3377	5074	3226	4084	4863	4832	5045	4605	2.61	2.61	2.61	2.61	2.61	2.61	71	2.61	43	26	65	30	3808	3702	4105	4339	4395	4566
8.77_839.67				839.665	ESI (+)	8.773	22190	29740	24934	16690	21987	29264	9658	9771	12342	13636	13277	13339	86	52	96	188	131	67	37	45	3.25	33	65	48	14847	16557	15472	15469	14770	15141
11.18_839.79				839.786	ESI (+)	11.182	1315	1470	2697	1583	1706	2044	33119	31963	41048	46195	49864	43332	1507	2384	2527	2237	2183	2379	337	340	303	417	330	687	12946	12589	12565	12184	12196	12547
10.90_851.79				851.79	ESI (+)	10.9	2703	433	1882	2039	2068	2525	27796	26233	35655	40509	41187	36109	325	368	1314	1096	2534	3026	250	321	578	1691	2011	2581	15531	15652	15137	15932	16640	16233
10.31_853.69				853.694	ESI (+)	10.314	2502	2682	889	993	549	921	1729	4011	1853	4808	1248	2.61	2.61	2.61	2.61	2.61	2.61	2.61	78	2.61	52	2.61	26	32	6067	6971	6945	6705	6194	6379
10.24_859.76				859.758	ESI (+)	10.244	6395	8947	10309	5774	6378	9357	28762	26592	30523	34190	40449	36527	1502	1468	1525	2024	1276	975	62	48	72	61	44	35	17345	17259	15996	16356	15689	16683
10.42_863.78				863.785	ESI (+)	10.417	955	914	663	235	354	452	5429	4798	5553	5570	6480	6236	348	206	45	113	228	329	42	43	4.16	4.16	4.16	4.16	4106	3612	3484	4181	4027	3648
10.82_863.79				863.791	ESI (+)	10.822	3533	5234	7512	4065	3910	5282	88722	83100	103002	111033	116956	109061	20761	21036	22070	22066	18706	18395	55	175	63	107	295	217	57961	56681	56432	55886	55639	54515
0.75_318.30				318.301	ESI (+)	0.746	16095	78360	993	3608	4263	19369	868	615	571	487	37924	1113	705	449	284	415	359	284	494	365	491	447	467	744	8534	8786	9279	8775	8636	9301
10.84_871.71				871.708	ESI (+)	10.837	1214	1480	1608	972	1243	1428	4514	3976	4265	4791	4503	3609	51	84	3.92	154	76	3.92	3.92	39	61	3.92	3.92	102	3599	3074	3681	3510	3502	3964
10.15_876.72				876.719	ESI (+)	10.154	4439	5842	4874	3032	4056	5435	3914	5468	4338	7483	5256	17422	3319	3666	3274	3117	3105	1833	28	47	21	38	40	57	2892	3703	1859	2322	387	8240
10.09_877.79				877.792	ESI (+)	10.087	2132	2630	3099	1761	1937	2828	4075	5267	4750	9434	7776	5837	2.63	2.63	2.63	2.63	2.63	2.63	46	47	31	26	2.63	31	3696	4617	3889	4551	4965	3497
10.23_891.78				891.783	ESI (+)	10.229	5888	4756	16732	8602	8196	11367	3.67	1675	2203	2938	2474	3082	3.67	3.67	3.67	3.67	3.67	3.67	3.67	37	3.67	37	3.67	3.67	5284	4368	2843	4483	5624	3643
10.83_891.82				891.818	ESI (+)	10.83	1682	2256	2712	1633	1593	2235	8703	8132	7834	9896	9114	8942	759	680	772	690	319	587	3.21	44	45	34	32	34	7634	7533	6955	7163	6517	6488
9.41_892.74				892.737	ESI (+)	9.407	2645	1858	2.94	498	1119	2475	7706	7491	8337	9635	10753	10082	466	319	619	944	215	269	2.94	33	83	38	29	72	4417	4169	4080	3999	4085	3939
10.99_894.77				894.768	ESI (+)	10.992	50.16	8035	11901	7058	1315	2467	37999	35429	39705	40850	44475	43444	50.16	502	50.16	50.16	50.16	50.16	50.16	50.16	50.16	50.16	50.16	50.16	29151	28918	27977	27590	28053	26149
10.83_895.72				895.723	ESI (+)	10.83	7287	7549	7493	4622	5041	6213	21044	19520	20976	22227	22762	22495	452	954	482	355	739	341	2.82	2.82	64	28	2.82	2.82	14675	14722	14394	13798	13885	17655
9.82_895.75				895.755	ESI (+)	9.824	3115	4162	4392	2743	2783	4160	19606	18694	23108	25205	25983	24052	4050	3832	6517	5838	5590	5605	28	2.75	28	2.75	2.75	2.75	7331	10850	10407	10305	9832	10131
11.21_896.82				896.822	ESI (+)	11.211	3565	14409	12372	687	935	11868	11645	12452	15258	15016	14713	15304	4226	5105	4143	5242	5078	5018	86	8.6	8.6	8.6	8.6	8.6	6964	7168	13371	4420	6474	2353
11.24_897.73				897.735	ESI (+)	11.24	3129	1368	3553	853	1834	1466	5514	3409	5820	3368	3558	6051	5.27	5.27	5.27	5.27	5.27	5.27	5.27	5.27	5.27	53	5.27	5.27	5.27	3915	3225	3724	3525	6360
11.64_897.79				897.789	ESI (+)	11.641	4244	7615	10929	6291	5521	7920	24826	18653	25226	28450	28535	27464	707	755	971	1068	80	72	40	3.83	3.83	50	3.83	38	12964	12783	11572	9963	9100	9181
11.02_899.75				899.745	ESI (+)	11.021	3039	4595	3410	2280	2863	3801	3747	3464	4161	4569	4698	4479	6307	6310	6122	6250	5840	6776	38	56	53	3.6	94	36	3612	3507	3059	3069	2777	2846
9.77_906.76				906.757	ESI (+)	9.769	12767	15919	11524	6810	7596	11808	49651	47640	58649	63023	69104	65421	213	87	322	119	181	99	2.85	45	37	2.85	2.85	29	29440	29154	28326	27734	28989	30111
9.76_911.71				911.712	ESI (+)	9.761	4232	5312	3838	2281	2437	4416	15597	15410	18770	18467	21434	20710	141	110	82	118	72	2.43	2.43	54	2.43	2.43	24	40	9735	9512	9944	10025	10322	9634
11.13_911.74				911.741	ESI (+)	11.127	3024	2970	2573	1002	2008	2686	6695	6672	7213	7446	7229	6317	3.08	190	3.08	3.08	302	166	34	53	34	33	31	3.08	4943	5332	5160	5234	5216	6198
10.34_915.74				915.743	ESI (+)	10.342	3646	3985	3898	2263	2925	4172	19749	19596	21236	22639	27482	25755	2.51	2.51	2.51	2.51	2.51	2.51	47	2.51	68	25	79	66	7715	8026	8032	8610	8039	7928
10.70_915.81				915.812	ESI (+)	10.7	772	768	950	656	660	822	9337	8360	9182	10386	11906	11041	9598	7974	8317	7976	7425	8100	30	2.97	33	35	2.97	2.97	3397	3667	3229	2350	3028	3424
10.65_917.76				917.761	ESI (+)	10.65	2429	3082	2470	1434	1749	2263	20394	21006	21064	22040	25886	24488	2.54	2.54	2.54	2.54	2.54	2.54	2.54	37	2.54	25	36	43	9830	10013	9912	10713	9852	9766
10.68_917.77				917.772	ESI (+)	10.678	2885	3151	3108	1799	1164	3274	15048	9607	9993	11264	15586	10073	3.73	3.73	3.73	3.73	3.73	3.73	3.73	37	51	3.73	43	3.73	2609	5062	2492	6878	5656	7734
10.71_917.82				917.818	ESI (+)	10.714	1092	3590	1614	1489	1843	1404	13761	9586	5603	10805	16553	19794	3.49	3.49	3.49	3.49	3.49	3.49	42	53	81	35	36	87	3356	3131	3395	6583	4814	2324
11.24_917.84				917.839	ESI (+)	11.238	10517	1932	2192	1409	1153	4447	12894	31872	17641	14900	28051	27494	2158	2165	2278	2216	2033	1761	51	32	69	45	3.18	44	9215	8554	9677	10238	13856	14903
10.88_921.73				921.734	ESI (+)	10.885	1471	1446	1081	299	455	373	5095	4744	5267	5262	3942	5380	767	1061	445	682	1037	745	4.85	76	49	59	4.85	73	4177	4315	3459	3784	3605	5046
10.24_923.79				923.79	ESI (+)	10.245	4842	6775	5865	3489	3816	6072	24763	23536	28604	31464	39608	35715	37301	35284	41610	38922	35984	36184	443	155	117	202	299	467	10706	10469	9907	10159	10134	10072
10.55_925.80				925.805	ESI (+)	10.549	2807	3985	3150	1671	1606	3284	16993	15845	18995	20844	22907	20894	75480	71706	79830	74914	69457	68651	6.84	6.84	133	6.84	77	68	7135	6689	6568	6770	6763	6404
10.98_927.81				927.812	ESI (+)	10.978	5517	7852	5688	2716	4293	6332	60302	36087	68361	74142	50791	62490	16815	15081	15361	19314	17559	14468	17	1.71	1.71	36	37	71	19659	18859	19268	20215	19791	20731
10.74_927.82				927.816	ESI (+)	10.741	2215	2648	966	801	711	1223	18429	17586	19166	21624	26583	24469	27362	26731	29279	27482	24762	24405	45	103	70	40	49	126	9565	9680	9080	9036	10023	9716
9.47_930.75				930.753	ESI (+)	9.473	11538	14032	9991	5628	8124	13899	24662	23677	29038	30089	35694	32520	111	76	53	53	47	156	3.71	45	37	42	52	96	10918	10112	10677	10322	10160	10113
10.42_936.80				936.805	ESI (+)	10.422	3535	4604	3287	1869	2168	3486	16054	16026	17652	19464	23269	20809	440	456	409	303	128	236	3.49	40	42	57	64	35	5690	6236	6134	5719	4860	6030
11.77_938.83				938.826	ESI (+)	11.77	1172	4221	3141	1332	794	1638	7589	3057	5360	9405	5699	5349	2746	2970	2686	2439	1853	1112	45	4.46	4.46	4.46	70	66	5426	3952	2401	3379	2704	1927
5.97_941.70				941.699	ESI (+)	5.969	4015	4309	3555	2890	3249	3599	2452	2528	3100	1927	2312	3213	1056	1318	1513	1208	1750	1739	471	352	644	352	717	653	3333	2788	3372	3539	3484	3395
9.37_943.75				943.752	ESI (+)	9.365	5145	6875	4186	2724	3091	6372	11080	10604	12598	14141	18131	16704	3.05	187	187	245	217	174	3.05	3.05	31	3.05	31	36	5681	6368	6232	5081	5395	5852
11.13_951.72				951.719	ESI (+)	11.129	3622	4713	3599	2149	3265	3865	10359	9835	10738	11534	11079	10402	125	156	78	3.6	3.6	99	3.6	3.6	77	36	3.6	48	8306	7922	7938	8011	7896	7218
10.90_951.81				951.811	ESI (+)	10.903	1847	1113	2711	1150	1758	2328	4078	7287	6205	8009	12288	8343	319	72	135	107	120	76	32	3.2	38	34	37	37	3188	4292	3745	4722	2765	3035
10.74_951.81				951.815	ESI (+)	10.741	1363	3236	992	937	730	2535	6167	6198	7256	5921	8100	7623	3848	2719	4619	3378	3411	3866	47	3.74	37	3.74	3.74	3.74	4297	4206	4246	3551	3582	3601
11.86_951.85				951.847	ESI (+)	11.859	245	6546	4675	2705	1779	3993	7363	7802	9444	11045	11829	10888	5.17	177	185	358	5.17	70	5.17	5.17	5.17	52	5.17	5.17	7248	7252	7365	6966	6466	302
5.96_963.76				963.762	ESI (+)	5.959	4461	4681	4227	3883	4455	3911	3879	3983	4442	3733	3801	4198	1560	1459	1047	1831	2019	909	192	69	138	141	95	132	3895	4338	4231	4025	4376	3947
6.50_969.71				969.712	ESI (+)	6.499	9906	11882	8699	5227	8986	12357	7582	7753	9064	9971	9964	8643	118	89	108	134	7.36	164	7.36	7.36	74	134	7.36	148	9626	9487	9664	9803	9688	10827
8.66_980.28				980.279	ESI (+)	8.656	6031	42815	5229	11388	2250	3727	36599	4213	6007	4845	8840	4002	3132	72841	1545	1496	1234	5057	27034	3943	6248	3804	41486	10399	7545	16444	1561	2607	6225	7046
5.99_991.79				991.789	ESI (+)	5.992	3337	3741	3419	2762	3633	3712	2764	3681	3605	3067	3208	2921	1515	1704	1406	1679	1844	1796	80	33	8	47	109	159	2787	3058	3521	3142	3279	3270
9.10_1054.30				1054.3	ESI (+)	9.096	5345	39594	4356	10008	2297	3681	34235	3116	5112	4092	7709	3450	2568	67714	1516	1834	1242	4519	25613	3590	5935	3391	37534	8927	6462	13503	1453	2334	5337	6312
9.50_1128.31				1128.31	ESI (+)	9.496	4376	33034	2866	8252	1610	2879	27366	2769	3833	3035	6285	2726	1695	57186	1127	1213	890	4269	22070	2674	4353	2557	32215	7382	5421	10940	791	1832	4309	5028
9.89_1202.33				1202.33	ESI (+)	9.887	3743	28815	2728	6971	1399	2433	24036	2147	3011	2400	5619	2212	702	51809	766	964	893	3659	20045	2310	3562	2239	28833	6331	4155	9224	925	1518	3418	4450
10.18_1276.35				1276.35	ESI (+)	10.179	2463	20246	1609	4673	805	1706	16227	1291	2141	1411	3738	1316	1024	34865	514	431	518	2440	14155	1369	2503	1040	19800	3877	2909	5955	275	845	2198	2969
3.36_359.32				359.317	ESI (+)	3.359	26177	33017	630	3659	7289	14848	2439	584	557	773	18655	875	652	797	560	587	543	736	968	448	1069	689	672	950	5154	5494	4983	5841	5362	5630
10.48_1351.38				1351.38	ESI (+)	10.478	2325	21436	1530	4700	578	1430	18677	1298	2058	871	4038	1161	1035	38805	617	14.94	358	2374	15237	978	1803	1352	21478	3684	2666	5922	149	753	2365	2281
6.93_1460.14				1460.14	ESI (+)	6.932	4346	5634	3116	1075	3255	6177	1873	2283	3149	3191	3729	4087	3.55	3.55	3.55	3.55	49	36	79	47	56	42	3.55	40	2850	3158	2809	3189	3833	4060
6.38_1464.10				1464.1	ESI (+)	6.382	4715	5570	5438	1832	5189	9913	2048	2547	2082	2122	3437	2400	68	41	2.64	44	36	2.64	2.64	2.64	26	2.64	2.64	2.64	2403	2613	3141	3307	3173	3404
4.92_1476.01				1476.01	ESI (+)	4.915	1013	1451	1557	528	1742	3316	1192	1615	2207	2450	2213	1580	2.95	36	2.95	2.95	2.95	2.95	34	2.95	30	60	2.95	2.95	3079	3041	3152	3221	3655	176
5.74_1482.08				1482.08	ESI (+)	5.742	10234	9886	11661	8022	13870	17074	4536	7947	7975	6189	8398	8233	42	4.24	90	143	71	113	89	46	4.24	4.24	141	63	6000	7071	8181	8942	8977	9827
5.54_1554.07				1554.07	ESI (+)	5.537	7633	7015	7032	3312	5709	10803	2970	4251	4663	4390	5434	4610	2.67	2.67	2.67	2.67	2.67	2.67	28	27	29	2.67	49	2.67	3605	4463	5121	5621	6181	5350
5.41_1566.15				1566.15	ESI (+)	5.414	6194	6456	8396	2696	7878	16804	901	2412	2487	3300	3829	3076	1245	2079	1737	1588	1462	1160	60	71	63	59	5.88	5.88	2732	3446	4171	3449	3627	4905
4.80_1612.13				1612.13	ESI (+)	4.805	3605	3103	1923	2.75	2493	6368	2.75	5880	8049	7715	9034	7368	30	2.75	38	2.75	31	55	28	2.75	31	47	2.75	31	1883	189	3573	4265	4837	5581
7.06_511.51				511.507	ESI (+)	7.058	5850	8503	5066	2749	4693	7417	1120	1131	1722	1964	1614	1830	57	34	32	3.12	3.12	3.12	31	3.12	3.12	3.12	3.12	48	2815	2982	3216	3308	2907	3492
5.22_536.17				536.166	ESI (+)	5.221	18814	18377	5482	5762	12432	13079	7751	20507	18403	3450	9127	4390	1101	12927	3409	7637	3214	5171	6104	4570	3818	5560	13761	14917	1664	13859	4412	17590	27620	38335
11.80_565.56				565.556	ESI (+)	11.798	642	1628	1378	1327	643	804	8076	5151	8168	8925	9757	10022	2035	1724	1955	1783	1036	225	529	566	634	642	182	312	6894	5995	5387	4885	4031	2568
6.18_610.59				610.588	ESI (+)	6.181	9220	9096	7886	4832	10046	12528	4661	6573	6436	6647	8680	7009	3184	3040	3987	4188	3760	3744	920	1122	1569	1586	1668	1778	6022	6606	7091	7653	8329	9032
4.96_611.53				611.534	ESI (+)	4.964	773	1914	781	653	1081	1449	3349	5683	4719	4458	6277	5283	179	370	197	294	274	173	2.65	37	33	26	33	47	3233	3394	2894	4757	4761	2056
0.69_239.16				239.164	ESI (+)	0.688	61216	83267	33437	18811	21688	38216	524	143	222	208	325	106	231	184	212	83	8.29	165	188	309	252	8.29	297	249	5256	5328	5277	5271	5478	5878
5.50_621.54				621.543	ESI (+)	5.496	3664	8392	6359	6031	4448	4110	3111	2376	2826	3050	2917	3110	54	1.23	1.23	46	36	34	1.23	31	1.23	12	25	61	4658	4685	4388	3775	3165	2301
5.62_630.57				630.568	ESI (+)	5.619	8533	11497	8046	4190	7523	10067	1277	1185	1574	1628	1577	2253	3.27	48	39	61	34	135	86	46	35	50	33	3.27	4213	3771	3739	3859	3748	4021
5.60_635.52				635.523	ESI (+)	5.6	23810	32751	24448	18388	23335	25968	5738	6584	7436	6619	6597	9204	115	60	52	83	92	2.66	2.66	50	48	2.66	27	2.66	13977	14066	14612	13625	14243	13202
5.99_637.48				637.481	ESI (+)	5.993	10344	13060	11858	8248	10907	15701	11304	9102	12264	13234	15320	17579	83	61	43	105	78	3.38	3.38	34	3.38	41	3.38	35	21000	20166	20803	20990	19100	18150
8.68_647.50				647.504	ESI (+)	8.682	3556	5053	3527	1434	3378	5121	4220	4339	5344	6163	4380	6131	3.78	3.78	38	50	3.78	97	3.78	3.78	55	3.78	3.78	62	3682	2536	3871	3846	3743	3923
8.38_647.56				647.556	ESI (+)	8.377	23045	31200	54.18	1942	4255	15429	54.18	54.18	54.18	54.18	19227	54.18	54.18	54.18	54.18	54.18	54.18	54.18	942	655	824	542	1457	1087	3277	4337	3632	5917	54.18	54.18
8.72_649.52				649.518	ESI (+)	8.722	4159	5502	3771	2163	3889	5712	3917	4716	5692	5968	7369	5973	3.29	3.29	3.29	43	36	59	3.29	3.29	3.29	53	33	84	3446	3642	3721	3810	3879	3743
6.33_651.50				651.497	ESI (+)	6.325	6199	7098	6198	4868	5980	8423	2803	2256	3067	3520	3417	3713	9	0.95	0.95	0.95	51	0.95	0.95	38	24	38	35	34	4180	4548	4899	4404	3647	3737
5.78_651.55				651.553	ESI (+)	5.776	36125	41701	33827	24104	30770	35252	6362	5810	7452	8676	7093	6542	101	85	40	136	128	3.98	50	91	74	3.98	3.98	43	14807	14678	14405	13669	13603	14437
5.60_657.58				657.576	ESI (+)	5.597	9451	18619	12989	8792	10970	11971	1438	5058	3304	1985	1521	4467	64	86	51	61	53	50	44	65	59	44	71	51	7598	6200	8403	8644	8808	7384
5.51_661.48				661.48	ESI (+)	5.514	6838	8321	4434	4637	4709	4914	16522	11009	14165	14800	14598	16906	181	90	89	129	178	141	50	32	29	2.93	54	71	19998	19687	18959	18471	17457	14939
6.25_663.55				663.553	ESI (+)	6.247	29796	37874	32856	16959	29043	39928	13157	14994	19431	21431	19331	18472	636.75	636.75	636.75	636.75	636.75	636.75	636.75	636.75	636.75	636.75	636.75	636.75	17530	19659	19337	18906	18954	19482
5.84_671.53				671.534	ESI (+)	5.844	5990	7872	7407	5469	6727	7801	5592	4414	5638	5668	5068	5774	56	2.83	2.83	38	2.83	67	2.83	2.83	2.83	28	2.83	65	6614	6061	6122	5836	4909	4601
6.51_677.51				677.512	ESI (+)	6.514	32688	47201	28740	19303	28694	41974	21171	16361	21360	23397	26184	26226	3.21	3.21	3.21	78	58	3.21	32	3.21	52	36	3.21	39	27280	27032	26576	26627	26233	23192
6.38_677.53				677.533	ESI (+)	6.38	22744	31266	21892	13860	20023	24511	7560	7573	10804	9777	9593	13979	38	104	125	42	33	52	39	2.47	48	60	66	25	21627	23384	22547	22073	22451	23423
6.46_679.59				679.587	ESI (+)	6.459	41922	63796	44456	22791	37333	52950	3761	4413	6307	7404	6379	5564	57	66	3.76	75	76	103	3.76	38	100	58	3.76	3.76	15308	15169	16118	14906	15147	15270
5.53_683.54				683.54	ESI (+)	5.53	6098	7676	4225	3277	4474	6019	10199	7664	9287	10587	10702	11058	47	145	3.92	60	55	159	3.92	77	39	48	50	54	8279	8005	7793	7436	6950	6616
6.38_686.59				686.591	ESI (+)	6.383	7079	5144	3487	2365	3726	4686	1520	1678	1902	1857	1630	2559	87	126	72	4.81	56	235	4.81	99	48	4.81	4.81	236	3142	3608	3422	3838	4250	5655
5.66_692.52				692.524	ESI (+)	5.664	404	183	101	3.3	194	216	4919	5306	7250	7603	7808	7538	3.3	3.3	3.3	3.3	3.3	3.3	36	33	100	3.3	38	3.3	3937	3889	4169	4391	4420	4879
6.58_693.56				693.562	ESI (+)	6.584	4905	5916	4866	2440	4256	5894	2949	3091	4124	4105	4096	3858	127	133	155	124	161	85	70	57	3.42	3.42	34	54	3731	3621	4086	4304	4381	4304
6.52_699.57				699.569	ESI (+)	6.52	5663	8658	5281	4061	5191	7172	4432	4039	4740	4981	5465	5875	3.53	35	44	49	47	69	71	3.53	3.53	47	42	50	6015	5846	5351	5573	5304	4030
5.67_731.54				731.542	ESI (+)	5.665	72.77	72.77	728	72.77	1130	972	9170	9324	11555	12088	12366	10984	72.77	72.77	72.77	72.77	72.77	72.77	72.77	72.77	72.77	72.77	72.77	72.77	15492	15433	15430	15744	15715	17033
6.67_732.60				732.603	ESI (+)	6.67	1302	2984	936	3.41	3.41	3.41	5223	5063	6312	7214	7655	6365	120	107	57	178	85	3.41	34	3.41	3.41	72	3.41	3.41	5984	2127	5497	4763	5417	3973
4.99_741.52				741.524	ESI (+)	4.988	10574	3196	3305	3025	4815	6436	2706	5485	3970	3537	4876	3943	5446	6063	6848	1735	5923	5645	3.38	72	142	58	109	34	7080	5276	6717	7839	9216	12187
6.37_742.64				742.643	ESI (+)	6.374	7658	10403	2122	1131	2588	3545	6908	7850	11297	10411	9927	14273	4.7	4.7	69	4.7	4.7	4.7	91	49	68	85	47	47	22785	22440	21130	16723	22403	16344
5.97_752.56				752.56	ESI (+)	5.973	15664	17430	12418	7131	11520	17371	49552	57193	65632	72517	69637	63152	908	1277	1276	1241	1167	971	18	353	214	202	58	88	31009	31820	32581	33156	34756	37249
4.79_755.55				755.548	ESI (+)	4.794	5274	6006	5662	3060	5087	5915	2541	4107	4300	4236	3961	4516	1370	1055	1263	345	805	1153	1552	635	957	796	953	1216	4572	4739	4834	4760	4756	5464
6.71_756.59				756.591	ESI (+)	6.714	5754	6934	4488	2633	4459	6002	30344	32232	38829	42516	36233	32814	213	221	193	130	290	83	63	147	108	6.28	72	83	15959	16125	15718	16762	16900	17379
5.90_757.56				757.556	ESI (+)	5.898	10763	12944	8289	4689	8070	11633	8637	9460	10517	11744	11608	10284	4.6	4.6	4.6	4.6	4.6	4.6	46	65	104	4.6	155	65	10774	10771	10846	11435	11681	12689
6.74_760.54				760.537	ESI (+)	6.737	8504	6661	3712	6424	3642	6584	4128	4593	3562	2976	1878	3494	3.67	3.67	3.67	3.67	3.67	3.67	45	37	65	3.67	39	71	5589	6294	6549	7387	6825	6907
6.11_761.59				761.588	ESI (+)	6.112	10096	11084	8512	5354	7435	10365	3188	3317	2362	4460	4266	2214	14259	13178	13548	13705	12446	13349	3.03	30	146	226	3.03	3.03	4514	3282	3293	2538	4464	2037
5.79_763.60				763.602	ESI (+)	5.787	3060	2940	5236	3016	4899	6508	1830	3350	4283	3467	4410	4030	32009	35115	41162	41992	36585	37004	89	94	48	45	4.52	53	3188	3814	4124	4316	4462	4982
4.69_796.56				796.564	ESI (+)	4.688	5444	10678	9307	4897	8191	12224	6016	6210	7473	8363	6816	6165	521	608	474	482	686	738	1095	1107	777	674	950	1281	6376	6307	6689	6160	6582	3315
4.89_810.58				810.577	ESI (+)	4.895	31645	35108	30133	9922	28516	41215	6.52	6.52	6.52	6.52	6.52	6.52	190	895	1675	363	353	466	65	6.52	6.52	78	6.52	6.52	6.52	6.52	6.52	6.52	6.52	6.52
4.75_838.61				838.607	ESI (+)	4.754	2827	3339	3426	1856	2719	3026	315	3689	4067	4422	4579	4320	140	72	168	209	227	122	2.23	42	40	28	22	32	1151	4164	4138	4121	4148	4466
4.95_852.62				852.623	ESI (+)	4.95	4022	5845	5455	3128	4106	4554	3689	3004	4250	4675	4303	4525	3.76	157	1054	629	3.76	3.76	38	94	77	40	107	3.76	3558	3627	3386	3308	3919	4844
4.41_862.61				862.607	ESI (+)	4.41	3100	2438	1604	226	1923	3225	2346	4032	4722	4709	4252	3599	80	151	146	81	241	184	66	60	51	30	44	85	3055	3775	4320	4899	5308	5687
5.26_878.64				878.638	ESI (+)	5.265	6890	8728	6660	4605	6280	6556	6337	5960	6426	7022	6354	6135	258	313	129	143	144	135	75	43	35	3.55	110	111	6319	5827	5474	5414	5633	5008
5.99_653.45				653.455	ESI (+)	5.992	2171	2659	2580	2085	2325	2649	2592	2294	2898	2922	3236	3890	2.61	2.61	68	38	40	85	2.61	2.61	26	2.61	56	36	4186	4603	4138	3922	3768	4234
8.41_647.51				647.511	ESI (+)	8.406	1869	4.98	4006	1809	2428	3405	4571	4425	5797	6341	5693	6928	4.98	4.98	4.98	4.98	4.98	4.98	4.98	4.98	95	4.98	50	4.98	3220	2606	3126	2670	2266	1776
5.53_677.46				677.458	ESI (+)	5.528	1769	1917	1204	1422	1101	1130	4055	3046	3398	3565	3811	4030	46	99	2.53	44	56	105	64	26	2.53	39	25	2.53	4820	4918	4571	4310	4082	4424
6.52_693.49				693.491	ESI (+)	6.519	5918	6707	5299	4534	5263	6763	4514	3752	2848	3578	4351	4915	3.43	3.43	58	3.43	51	39	49	3.43	3.43	34	3.43	94	5630	3503	4636	4803	5404	5308
4.93_699.44				699.438	ESI (+)	4.929	12253	13343	9486	8141	9696	11118	12329	11595	13835	13966	14545	14944	6.42	62	97	6.42	6.42	6.42	67	6.42	6.42	6.42	65	64	11224	11842	11759	10850	10698	11846
7.87_727.57				727.567	ESI (+)	7.869	19375	25021	17760	10069	13050	18028	3001	2904	3476	3946	7196	8052	276	400	135	100	134	34	88	65	84	3.43	45	78	8953	8214	8342	8133	7725	8128
6.42_717.59				717.59	ESI (+)	6.419	6614	7602	6066	3633	5482	7365	1959	2038	2442	2616	2495	2205	847	651	588	630	596	827	1435	1135	1207	1326	1541	1620	3168	3107	3290	3416	3591	4004
6.67_731.60				731.599	ESI (+)	6.674	10378	13385	8687	5060	7345	10312	11588	11349	14128	15825	15822	15141	96	15	128	119	216	41	1.5	39	143	53	54	61	13020	13112	12326	12369	11870	12839
6.86_775.67				775.666	ESI (+)	6.855	1480	1110	950	436	1.68	1041	3927	4615	6042	5736	8248	8257	1.68	311	261	138	172	339	1.68	66	89	105	68	17	3550	3584	3722	3665	3769	3791
6.62_769.63				769.626	ESI (+)	6.618	757	3685	5486	1.88	542	654	10736	10206	13908	16485	13706	12670	70	127	1.88	196	142	19	30	39	38	1.88	58	166	13626	13471	12320	13749	14143	15448
8.78_817.61				817.611	ESI (+)	8.778	48646	68896	60542	36344	50313	68368	19883	19440	25348	28912	26700	28030	136	103	88	149	68	114	37	54	40	29	56	80	32683	33565	33443	32181	31687	30258
9.55_817.71				817.713	ESI (+)	9.55	1538	2419	2364	1367	1519	2010	3785	3616	4419	4532	5044	4816	680	679	695	633	446	633	3.06	31	38	3.06	35	3.06	3294	3478	3331	3181	3372	3196
5.93_805.64				805.64	ESI (+)	5.927	2264	2716	3080	1746	2497	3476	2529	2696	3508	3562	3925	3768	5.18	5.18	5.18	5.18	5.18	5.18	52	56	5.18	5.18	5.18	58	3036	3054	3350	3329	3416	3296
9.85_831.73				831.727	ESI (+)	9.852	2669	3401	5200	3111	3076	4197	7688	6964	8508	9297	10041	8906	110	75	141	157	138	85	37	72	42	3.66	3.66	39	5440	5214	5162	5104	5088	5100
9.56_867.73				867.729	ESI (+)	9.557	5167	7050	5938	3391	3751	5348	3868	3651	4440	5153	5409	4804	165	119	211	223	79	71	28	40	2.83	58	2.83	86	3724	3473	3350	3499	3665	3459
9.57_881.74				881.744	ESI (+)	9.573	2763	3615	3668	1945	2435	3585	8991	8895	11052	12400	12626	11708	325	423	436	497	551	322	2.67	38	76	27	2.67	2.67	5958	5920	5818	5771	5833	5488
11.32_871.76				871.764	ESI (+)	11.323	562	653	2677	1191	633	1931	6261	5329	5701	6261	5984	6185	36.12	36.12	36.12	36.12	36.12	36.12	36.12	36.12	36.12	36.12	36.12	36.12	4227	2345	3718	3114	3970	3384
10.26_885.78				885.776	ESI (+)	10.257	7199	10250	9368	5552	6018	9288	46298	42370	48856	53584	66050	59345	1899	966	2333	1728	1647	1737	3.91	3.91	46	45	39	3.91	32044	31177	31094	30377	30214	31290
9.42_905.74				905.743	ESI (+)	9.419	3251	9156	6663	3814	5435	8564	8351	7871	9771	10824	11679	10824	2.75	75	48	86	189	95	63	2.75	54	87	28	2.75	5164	4852	4824	4965	4800	4586
10.73_901.80				901.804	ESI (+)	10.73	6749	9669	7374	4071	5057	7311	50431	46549	54775	58272	66255	65931	651138	635950	695504	673661	613045	613042	162	218	164	265	131	396	44469	42315	42698	41977	41408	42078
10.02_921.77				921.771	ESI (+)	10.017	4292	5921	4548	2884	3521	5543	11339	10173	11909	13386	14956	12824	9069	8008	9445	8584	8296	8365	39	3.61	47	3.61	36	56	4989	5067	5152	4891	4781	4764
9.98_897.77				897.774	ESI (+)	9.977	3208	569	556	2076	2543	4612	6039	16685	6254	6630	7373	8019	56196	53615	60999	55746	51339	51345	195	66	46	58	116	92	9668	9882	9507	9420	8820	8763
11.12_915.82				915.819	ESI (+)	11.117	7704	12609	9705	5206	6842	9945	69379	61208	67585	86181	94141	83172	177	395	225	466	440	313	62	77	86	69	49	35	25359	24569	24009	23168	22756	20610
10.12_935.79				935.789	ESI (+)	10.119	2587	3649	868	1522	1750	3136	10554	10356	12225	13105	15761	13354	39	276	156	60	195	230	2.6	38	26	38	2.6	2.6	4246	4001	4827	4654	4529	3255
10.56_913.80				913.802	ESI (+)	10.565	2848	2223	2597	2623	1857	3182	18519	22326	23639	22646	33630	29938	3620	3220	3605	3636	3064	3095	57	5.57	67	56	84	90	11345	10040	13056	12000	13102	13902
10.35_911.79				911.789	ESI (+)	10.346	8200	10563	10175	5398	6471	9574	58743	54953	65400	69927	87945	79718	2514	2354	2479	2648	2107	2264	3.51	70	3.51	39	66	35	20811	20430	20351	19927	19782	20232
9.62_931.76				931.759	ESI (+)	9.62	3704	4450	3508	2088	1899	4424	6484	6013	7402	8693	8811	8360	79	52	53	66	58	102	45	31	32	62	49	3.06	3937	4027	3802	4007	3797	4129
11.22_929.83				929.833	ESI (+)	11.219	7124	9433	6540	3737	4978	6748	50793	49578	54464	61051	72883	64898	4891	4431	3976	3070	2182	1814	115	73	106	126	87	7.26	25559	24639	25743	25859	25914	25010
11.15_941.84				941.838	ESI (+)	11.155	2806	3123	2345	1266	1827	2999	16965	17205	18508	21495	25547	22568	175	254	3.18	224	3.18	79	35	32	3.18	3.18	3.18	98	4937	4539	4697	4289	4488	5472
11.32_953.73				953.735	ESI (+)	11.322	1150	1783	1946	1376	1584	2075	6398	6571	6935	7156	7551	7476	2.68	56	35	174	2.68	45	59	33	2.68	27	75	35	3603	4035	3692	3868	3735	3641
10.85_951.83				951.829	ESI (+)	10.849	2365	3535	1437	1265	1469	2069	9373	9011	11271	13242	18011	14108	1211	150	1702	253	1113	148	4.11	4.11	4.11	41	50	42	4242	1824	3916	3663	4622	5054
4.80_1005.77				1005.77	ESI (+)	4.801	4801	4710	4262	4342	4472	3550	3806	4351	4286	3934	3789	4014	393	510	791	1053	940	1209	118	176	42	160	97	114	3995	4212	4166	4145	4153	4373
4.93_661.48				661.481	ESI (+)	4.931	4100	3	4770	63	5700	7035	5266	6034	7269	135	7626	673	33	35	3	3	77	63	52	59	52	30	75	67	192	4797	6120	6797	6074	3358
5.10_659.46				659.465	ESI (+)	5.097	11604	14654	9715	5986	9410	12598	2428	2404	2604	3272	3272	3839	43	2.71	2.71	50	54	2.71	37	50	28	27	33	31	5347	6163	5633	5193	5279	4805
5.22_685.48				685.481	ESI (+)	5.216	11879	7009	5538	5174	8560	8539	13806	10726	10509	11501	12307	13038	40	4.02	47	4.02	4.02	4.02	4.02	4.02	4.02	59	55	4.02	7403	6132	6469	7154	8528	9537
4.97_733.58				733.585	ESI (+)	4.974	5887	4894	3491	2179	4249	5309	1977	3949	3461	2954	4149	3878	242	280	313	670	463	418	111	69	132	192	77	170	2300	2666	3131	3725	3873	4381
6.43_731.57				731.569	ESI (+)	6.426	1633	2632	1655	1062	1650	1610	1914	2188	2379	2931	2687	2926	129	176	113	138	162	5.35	60	58	119	54	67	101	3101	2900	3123	3277	3188	3712
6.43_747.60				747.599	ESI (+)	6.43	7380	9448	7268	4157	6032	8916	4943	5116	6714	7220	7376	7509	2442	1646	1376	2557	2487	422	36	64	48	53	49	3.58	6792	7298	6869	7108	7155	7972
5.30_741.56				741.562	ESI (+)	5.3	24966	24882	24881	16957	24703	26094	14253	18364	19193	18839	19826	22002	5620	5128	7017	6804	6081	7321	512.78	512.78	512.78	512.78	512.78	512.78	18775	22874	21861	23056	21833	24612
6.43_755.57				755.572	ESI (+)	6.433	6.11	6.11	6.11	6.11	6.11	6.11	7025	7216	9155	11058	7502	6351	629	1270	1185	1059	1090	1002	6.11	84	68	61	81	6.11	3345	5166	4881	3149	6.11	1526
6.38_773.62				773.617	ESI (+)	6.382	5977	5643	5696	2609	5001	6540	2296	4078	4771	4087	5342	5026	2690	4648	4078	4920	2829	4819	3.33	42	41	36	79	33	3655	4352	4883	4939	5400	5484
6.76_803.66				803.662	ESI (+)	6.763	17128	21876	14765	7624	13343	21072	7811	8659	10228	11151	10723	10680	410	281	206	197	155	529	102	102	149	170	77	58	10470	10863	11044	11737	11694	12311
6.10_797.61				797.615	ESI (+)	6.101	9758	11579	8626	4038	9867	16431	1409	2063	2205	918	3437	2206	3.96	3.96	3.96	3.96	3.96	3.96	146	40	49	3.96	3.96	159	2982	4154	4683	4562	4111	5161
6.95_819.69				819.692	ESI (+)	6.949	4312	6065	3630	1838	3434	5096	4523	4677	6617	6845	7361	6825	28	94	101	2.8	197	190	30	48	2.8	2.8	62	2.8	5130	5368	5501	5214	5381	5228
7.72_845.71				845.712	ESI (+)	7.722	3395	4241	3278	1974	2891	4204	4115	4350	5757	6148	6582	6473	41	47	100	63	3.43	62	34	50	74	3.43	3.43	83	3452	3271	3368	3593	3329	3478
10.93_857.71				857.711	ESI (+)	10.927	1171	1106	1213	1017	1221	1736	4669	4275	4387	4495	4742	4576	3.38	109	105	3.38	59	3.38	46	98	34	42	102	113	4556	4766	4554	4246	3066	5879
10.83_869.71				869.711	ESI (+)	10.829	5045	4294	5466	4123	4284	4926	13848	13132	14145	15149	14209	13783	2.92	2.92	2.92	2.92	2.92	2.92	46	29	2.92	2.92	2.92	89	12926	13053	12805	12616	12431	15024
11.13_909.74				909.741	ESI (+)	11.129	10018	10861	6605	4669	6476	7898	21253	20917	22250	23914	22983	22007	3.59	3.59	3.59	3.59	3.59	3.59	3.59	42	74	36	37	38	16438	17454	16410	16236	16490	19719
10.74_925.69				925.686	ESI (+)	10.745	3970	4778	4470	3986	4515	5293	1261	3.26	1765	3.26	3.26	3.26	3.26	3.26	3.26	3.26	3.26	3.26	78	3.26	33	91	3.26	39	2801	3517	4164	3542	4270	3027
11.51_937.77				937.774	ESI (+)	11.508	923	2110	1483	774	1147	1518	5546	5738	6270	6717	6931	6491	2.74	2.74	2.74	2.74	2.74	2.74	2.74	2.74	27	2.74	39	86	3291	3484	3332	3475	3721	4456
0.74_274.27				274.275	ESI (+)	0.744	29611	194841	4634	8677	8263	41892	4232	3577	3711	3659	95533	4549	3328	2778	2580	3755	2930	3239	4370	3092	4586	4122	4237	3978	22373	20840	22493	22318	21908	22598
1.22_288.29				288.289	ESI (+)	1.222	220	299	144	71	281	323	2855	2922	2216	2243	1576	1529	52	6	49	64	27	66	0.57	55	41	127	73	36	4293	4286	4606	5077	5243	5228
0.99_244.23				244.227	ESI (+)	0.987	1420	1565	508	349	572	568	8276	9274	9519	9749	10640	8086	101	51	102	144	74	90	392	198	263	6289	82	273	4869	5587	5845	5645	6070	6371
1.17_258.24				258.243	ESI (+)	1.169	337	161	377	49	100	2.48	6051	6181	8963	10448	6533	5585	2.48	38	31	25	81	52	48	87	116	2.48	36	2.48	8088	7707	8003	7603	8022	8292
5.04_812.55				812.552	ESI (+)	5.042	52033	20793	15642	8425	20954	28574	9389	8122	12464	14251	15228	15239	189	3.36	341	3.36	3.36	118	91	34	91	42	82	47	9328	9421	9460	9860	9552	8451
4.84_844.52				844.524	ESI (+)	4.841	3.69	3.69	3.69	3.69	3.69	3.69	2718	4134	5046	4903	5622	5148	229	66	158	124	52	71	3.69	38	3.69	3.69	3.69	37	2737	3315	3636	3632	4230	5768
6.76_615.50				615.497	ESI (+)	6.761	12294	18008	17363	10886	15757	25029	6818	5787	7626	9080	9529	9373	105	75	161	51	136	4.58	47	74	88	46	74	46	15024	15527	14938	15306	14593	13773
6.46_680.59				680.585	ESI (+)	6.455	19436	28809	19974	10555	16540	24332	1854	1924	2964	3600	2800	2692	54	62	50	34	35	48	45	43	38	41	44	48	6453	7230	7254	6937	6735	6841
6.32_665.51				665.512	ESI (+)	6.324	6653	7819	5685	3795	5581	7734	7502	6257	7717	8782	9708	10542	87	4.33	117	4.33	60	4.33	4.33	112	4.33	4.33	43	4.33	5892	6327	6195	5915	5853	5574
8.10_694.60				694.597	ESI (+)	8.1	3928	5580	13064	7803	9267	11766	6016	5631	6807	7267	7421	7329	170	144	177	19	76	195	53	66	50	31	1.94	88	5798	5878	5784	5615	5277	5363
6.38_699.59				699.59	ESI (+)	6.381	30469	38609	27863	15956	28114	36802	8148	10490	13281	11818	13003	17960	4.13	4.13	48	97	73	156	4.13	59	85	4.13	50	41	25316	28222	29726	29869	31875	30479
7.06_727.62				727.621	ESI (+)	7.06	17600	19445	11417	4372	13298	24426	2979	4288	5737	5703	5715	6058	3.65	3.65	3.65	3.65	3.65	66	3.65	85	74	36	68	92	8347	8838	10655	11049	12150	11780
5.35_721.57				721.569	ESI (+)	5.354	1469	1930	1663	1015	1776	2079	4205	1836	4420	5951	4873	947	1593	1581	2056	1742	1132	1782	13.99	140	13.99	13.99	173	13.99	3554	2355	1870	4034	1684	4048
9.11_750.66				750.659	ESI (+)	9.112	3306	4657	7803	4644	4537	7292	8463	7408	10569	11716	10686	9258	27.07	1065	271	334	27.07	27.07	27.07	27.07	27.07	27.07	27.07	27.07	5701	5532	3082	5404	3394	5203
5.55_734.57				734.571	ESI (+)	5.547	33480	43458	26145	13756	22580	33252	8291	10248	15584	16984	13744	12377	313	304	117	318	145	194	5.47	5.47	64	78	88	55	11434	11420	11714	11804	12218	12449
9.49_764.67				764.674	ESI (+)	9.489	2531	17581	5517	8880	2952	18731	4051	3881	3944	4388	4508	3531	182.97	182.97	182.97	182.97	182.97	182.97	182.97	182.97	182.97	182.97	182.97	182.97	5864	5576	4312	2856	5216	4342
5.90_745.58				745.575	ESI (+)	5.903	3031	2667	3159	1930	2359	4215	5084	3390	6359	12519	8364	5039	3.55	3.55	3.55	3.55	3.55	3.55	3.55	36	42	56	53	68	4590	8364	4403	3019	2659	2585
10.38_782.72				782.723	ESI (+)	10.379	2220	1501	1991	1504	1668	1955	5252	3909	4923	6135	6365	4875	2884	2872	3384	3303	2848	3597	946	885	877	1062	1001	1829	2977	3118	2982	2803	3224	3646
5.92_762.57				762.567	ESI (+)	5.923	3327	4.98	4.98	5841	6411	4.98	2323	4042	5939	8295	3917	6552	4.98	4.98	4.98	4.98	4.98	4.98	105	55	95	69	50	82	6164	5184	7732	7425	5542	8872
9.63_783.65				783.648	ESI (+)	9.626	1658	2899	3152	1841	2268	3066	4632	4802	5810	6001	6345	5756	4.11	120	48	88	124	60	98	4.11	49	4.11	41	4.11	3866	3874	4031	3670	4029	3529
5.79_773.56				773.565	ESI (+)	5.791	343.64	343.64	343.64	52074	343.64	343.64	343.64	343.64	343.64	343.64	343.64	343.64	7747	3889	5268	5063	3436	4608	343.64	343.64	343.64	343.64	343.64	343.64	343.64	343.64	343.64	343.64	343.64	343.64
6.62_768.61				768.61	ESI (+)	6.619	16302	18932	5.1	5.1	11010	5482	11002	5184	13775	4971	11218	10363	5.1	5.1	5.1	5.1	5.1	183	51	101	120	121	84	126	8453	10391	9677	10561	5980	4909
10.02_794.72				794.723	ESI (+)	10.024	374	569	466	195	109	348	14951	14097	19212	21365	21849	19546	59	66	104	30	109	191	178	92	83	71	25	185	5585	5561	5589	5370	5398	5586
6.60_776.58				776.582	ESI (+)	6.598	4958	4791	3019	2137	4393	6095	6759	7202	7213	7546	2487	6904	256	149	197	2.59	260	135	43	119	26	139	59	50	5302	5184	5413	4601	6073	6501
9.95_797.66				797.66	ESI (+)	9.945	7096	9423	6046	4103	4467	6529	5815	5661	6250	6875	6939	6615	263	295	118	5.08	275	248	99	60	51	5.08	55	55	5891	6356	5773	6089	6051	5542
6.01_775.62				775.623	ESI (+)	6.007	12357	21610	14158	7474	12730	18550	12108	14005	18503	20509	19618	18577	3.53	3.53	3.53	3.53	3.53	3.53	79	35	3.53	76	39	46	14300	15358	16450	16512	16835	17741
10.82_810.75				810.755	ESI (+)	10.818	2839	2414	3530	2656	2846	3103	14088	12034	14573	17694	14957	13574	3166	3276	3441	3431	3159	4227	1128	1176	882	1350	960	1961	8222	8343	7127	7266	7652	8654
10.35_813.69				813.694	ESI (+)	10.353	739	874	1349	970	860	1013	29831	29787	37411	40238	36530	34738	300	463	368	301	469	1054	167	172	100	95	88	155	15715	15833	15650	15260	15147	15001
9.91_811.68				811.678	ESI (+)	9.913	547	993	1153	389	970	458	4913	4352	5458	5871	6310	6145	44	187	479	400	130	4.39	52	89	75	78	107	62	3164	2958	3200	3148	3056	2851
9.91_806.72				806.722	ESI (+)	9.914	3394	4291	4095	2325	2863	3636	17507	16659	19488	22167	25098	23222	432	440	510	309	830	112	119	70	83	67	63	6.31	11985	11802	11431	11102	11027	11240
9.66_809.67				809.666	ESI (+)	9.656	1758	2208	1753	1267	1537	1884	4748	5008	5817	6476	7177	6450	63	2.68	131	115	62	217	2.68	2.68	59	55	27	97	3635	3928	3973	3828	3728	3621
10.42_822.76				822.756	ESI (+)	10.42	5039	12325	4856	3404	6111	3672	51709	68108	74938	81256	77960	82145	453	686	519	426	253	259	97	41	65	89	56	4.09	26123	39308	29441	34775	29382	21532
5.40_793.56				793.564	ESI (+)	5.399	3597	4810	4094	2413	3582	4981	2091	2569	3541	4732	3216	2781	4.34	3047	4.34	4.34	4.34	4.34	43	4.34	55	89	68	117	3232	4082	3093	3399	3833	3879
10.09_820.74				820.738	ESI (+)	10.094	919	1096	1418	865	692	1273	11830	10914	14387	15193	15682	13837	182	131	146	239	171	145	52	88	48	160	4.76	70	8810	8014	8326	7918	8025	8071
9.99_823.68				823.681	ESI (+)	9.994	4263	5974	6310	4046	3944	5310	17633	17563	21207	23714	21902	20266	862	1577	369	1340	225	303	32	54	3.17	46	125	3.17	17985	18411	17574	17181	17859	16521
5.43_817.63				817.63	ESI (+)	5.426	4188	4297	5373	4257	4913	4950	2207	3231	3553	4144	3818	3557	4677	1477	2750	3346	3958	1321	3.13	65	34	62	35	31	4584	4475	4516	4081	4323	4274
6.83_803.65				803.649	ESI (+)	6.826	6860	10221	8236	3700	7383	10445	2648	3389	3703	4343	3679	3293	258	255	54	573	747	547	5.44	5.44	86	5.44	84	5.44	4625	5071	4869	5052	5116	5573
10.13_837.69				837.694	ESI (+)	10.127	3360	4514	5344	3204	3152	4501	23798	22650	24509	27502	33043	30397	205	508	502	399	336	331	44	59	59	33	3.28	59	14716	15367	14891	14855	15202	14145
6.76_835.69				835.691	ESI (+)	6.76	4817	6153	3472	1941	2996	4965	4361	4445	5465	5478	6318	5306	2.78	2.78	2.78	2.78	2.78	2.78	47	2.78	53	36	28	42	6491	6955	6857	7210	7504	7700
11.12_855.74				855.74	ESI (+)	11.12	1936	2548	4347	2506	2695	3224	12286	6150	13153	14936	11513	11176	14279	11675	11715	6619	6442	3782	159	266	141	213	183	185	6634	8506	5704	4710	4227	4192
5.15_828.62				828.616	ESI (+)	5.151	3.84	3.84	670	3.84	762	1472	1695	3123	1523	3257	3.84	3.84	3.84	3.84	3.84	3.84	3.84	3.84	50	3.84	49	38	3.84	49	4537	4841	4755	5046	4815	4491
4.30_831.56				831.559	ESI (+)	4.302	5278	4981	3324	1797	3640	5240	3208	4350	4888	5293	4461	3879	111	154	162	121	82	289	48	100	87	50	40	45	2883	3238	3129	3500	3595	4443
10.55_848.77				848.772	ESI (+)	10.547	1640	2104	2632	1517	1507	2182	32266	34102	40527	41130	44857	48599	2365	2187	694	3074	1659	2178	69	38	73	169	138	108	22826	21432	21501	22341	23515	23212
10.04_849.70				849.695	ESI (+)	10.045	6269	7718	7816	4468	5494	6859	15513	15205	18253	20145	20377	18944	1675	1325	1260	1561	1257	1084	55	4.08	188	4.08	41	4.08	8811	9240	8753	9172	9457	8570
9.93_844.74				844.738	ESI (+)	9.93	2145	3194	4563	2869	2756	3800	17629	17154	21296	21344	25649	25274	39462	37191	39760	21862	17829	16162	29	53	45	48	88	78	11833	11333	11409	11607	10988	11042
9.76_847.68				847.678	ESI (+)	9.761	5143	6612	8488	5276	5894	7557	5249	5575	5799	6405	7433	6656	349	483	376	595	526	584	41	37	65	35	27	42	4820	4721	4605	4900	4646	4644
9.76_842.72				842.724	ESI (+)	9.759	15767	21892	27416	16330	16221	21914	16717	16470	19102	20974	22849	21475	1301	1654	1375	1336	1101	1145	60	67	3.98	43	49	40	14486	14194	13912	14058	13701	14290
9.34_840.71				840.708	ESI (+)	9.335	3652	5204	4676	2588	2869	4260	5957	5468	6918	7730	8732	8350	514	256	403	258	204	198	5.62	5.62	5.62	5.62	91	56	3882	3997	3639	3582	3881	3618
11.57_866.82				866.818	ESI (+)	11.571	1230	2019	3951	1765	1433	2200	22181	3678	24178	31635	27381	26803	2511	2227	2054	1686	1605	1743	254	293	269	191	305	182	11363	9659	9700	9478	2043	786
10.27_860.76				860.761	ESI (+)	10.272	2321	3298	3703	2157	2413	2998	15222	9521	16728	13660	18915	13740	2871	2469	2865	2868	2663	3069	56	4.46	45	63	45	4.46	8507	8307	7885	8324	8021	8022
9.93_861.69				861.694	ESI (+)	9.931	2449	3171	4190	2607	2625	3544	11129	11087	13197	13706	15175	13654	123	71	69	94	48	120	33	35	57	3.28	50	41	6064	6027	5894	6004	5926	6074
9.88_856.74				856.738	ESI (+)	9.885	7857	10749	13211	8130	8065	11378	30420	28852	32577	36716	42615	40112	969	678	536	766	675	443	37	21	60	32	43	85	12978	12906	12349	12601	12631	17328
9.69_856.75				856.746	ESI (+)	9.686	792	1200	923	745	647	1887	6671	4305	4571	5184	8811	7364	153	239	420	271	364	410	6.88	6.88	6.88	69	6.88	118	1728	2092	2523	3291	3533	3469
9.64_859.68				859.679	ESI (+)	9.642	2968	3487	2675	1738	1874	3118	7587	7553	7885	8194	11184	10297	55	52	2.79	2.79	66	49	2.79	28	2.79	82	2.79	2.79	3949	4276	4253	4313	4235	4095
9.49_854.72				854.725	ESI (+)	9.492	3897	5001	7077	3900	4312	5997	12224	11143	14392	16240	18010	16474	201	288	193	349	99	136	3.28	58	50	33	33	88	5979	6061	5610	5696	5591	5452
11.54_878.82				878.818	ESI (+)	11.536	254	10057	13144	7035	208	11261	30785	4862	23282	41294	19532	25652	13203	7995	5015	2938	1522	1178	152	82	349	56	192	108	16218	12730	7237	4152	1746	1004
10.54_876.80				876.799	ESI (+)	10.537	7601	9636	7930	4374	5860	8627	14575	13485	16778	17531	16946	15947	110	308	407	389	207	176	3.28	63	42	35	33	39	10592	10629	9425	9674	9292	9201
11.11_876.80				876.803	ESI (+)	11.105	18335	26841	34176	18236	20679	30339	488857	250350	325080	610807	731380	420118	2675162	2618485	861572	722190	687404	352680	1085	821	1000	678	1026	1139	221613	217623	212874	130116	208041	208056
11.72_867.78				867.779	ESI (+)	11.721	2018	4123	3030	1791	2330	2886	5809	4765	6742	6913	6980	6381	56	46	99	54	3.59	3.59	3.59	3.59	46	37	51	36	5648	5918	5366	5062	4748	4049
10.57_872.77				872.772	ESI (+)	10.572	3750	10108	9009	4586	4023	6831	31984	21588	29993	42156	44334	30333	57065	55886	60133	58690	52861	54791	46	71	73	53	97	106	15194	16241	14636	11496	10294	9088
9.89_870.75				870.754	ESI (+)	9.895	2163	5852	5213	1870	3610	4134	11021	9336	12265	13882	14655	14348	28591	25456	34658	33570	33265	36097	4.23	74	166	115	42	92	8301	7584	7523	7697	7695	7709
10.22_875.71				875.712	ESI (+)	10.221	3778	5719	6335	4689	4221	5897	27229	27364	30209	31841	32743	30553	1246	734	363	353	539	284	34	36	72	50	73	3.37	13093	13557	13039	13423	13458	13071
9.58_866.72				866.725	ESI (+)	9.58	7815	10824	8598	4557	5750	8537	5952	5390	6433	7505	8497	8272	296	299	241	339	171	60	50	4.7	4.7	4.7	47	4.7	5539	5846	5685	5603	5524	5722
10.54_855.68				855.685	ESI (+)	10.54	1542	1756	2782	1785	1803	2178	17885	17648	19236	21223	19791	19620	275	0.87	23	36	289	91	9	74	97	69	34	62	13392	13135	12727	12742	12828	14562
10.93_892.83				892.833	ESI (+)	10.929	768	997	1337	1231	1115	1578	3928	5839	3.27	6595	6693	3765	195	203	90	144	3.27	156	33	45	57	46	112	61	5564	5332	6555	4623	5586	3644
10.60_890.82				890.817	ESI (+)	10.601	7945	9783	9541	5170	6761	9667	8057	7920	8934	5410	10085	9519	911	1482	619	495	957	1641	0.69	0.69	66	0.69	30	7	5986	5210	10988	6157	4900	4887
10.00_888.79				888.793	ESI (+)	9.999	1427	3	561	1325	800	567	1190	6472	7193	7713	3	971	3	3	3	189	3	3	41	3	51	30	59	3	6545	6041	6766	7697	6524	6364
10.99_893.76				893.761	ESI (+)	10.99	9772	13209	12654	7599	9054	12056	55196	49434	56626	59908	63917	61279	761	555	307	99	457	63	33	3.27	109	34	45	3.27	41622	42215	40781	39672	38774	37160
10.99_888.80				888.804	ESI (+)	10.994	33509	47917	44159	24216	28826	42155	404313	366051	446266	508606	548245	492507	4049	3589	3878	3548	3153	2949	5.47	109	221	63	55	122	210524	216549	198103	193889	202018	188570
10.71_886.79				886.786	ESI (+)	10.706	14859	25085	24081	11948	15592	23716	145763	131166	154398	175109	200169	144008	3042	1419	3130	2639	1668	2254	30	31	38	87	58	2.99	55831	55123	52058	50984	48001	40823
10.34_889.73				889.729	ESI (+)	10.339	3414	4389	5300	3155	3570	5042	25918	25463	27888	30153	32861	31934	3.05	3.05	3.05	3.05	3.05	3.05	3.05	3.05	78	3.05	3.05	31	10772	10762	10730	10827	9068	10002
10.34_884.77				884.77	ESI (+)	10.341	10801	15786	18468	10246	11218	16411	110249	104516	123208	135784	159540	142272	4099	4121	4524	4173	4026	3974	45	50	63	33	70	86	38248	37427	36958	37140	36923	36697
9.95_887.71				887.71	ESI (+)	9.947	2632	3985	4213	2784	2826	3895	15320	15561	18359	19763	22719	20449	225	2.77	147	185	77	2.77	50	49	2.77	36	28	30	7773	7733	7781	7579	7104	7191
9.68_885.70				885.696	ESI (+)	9.681	2926	3602	4246	2370	3069	4432	11371	11365	12556	13532	16884	15038	83	168	2.84	114	148	2.84	2.84	34	2.84	28	65	2.84	5102	5045	5577	5300	4533	5022
9.26_878.72				878.723	ESI (+)	9.258	4063	5506	5187	3014	3795	5383	6088	5513	6956	7945	9128	8091	43	3.38	75	88	103	46	3.38	3.38	34	3.38	3.38	3.38	3855	3865	3818	4032	3762	3518
11.56_909.79				909.789	ESI (+)	11.561	11970	19640	17094	9103	9894	13956	54903	46874	57276	66199	61511	59123	3982	3522	2257	265	282	43	39	33	76	3.28	56	86	30536	29614	27098	23699	23416	22191
10.83_904.83				904.832	ESI (+)	10.829	3276	4010	4434	2617	3039	4244	18294	17915	18180	20055	21318	20070	454	1043	876	1295	842	963	51	44	62	32	3.23	33	12811	13004	13130	13256	13150	12136
10.42_902.82				902.817	ESI (+)	10.419	1371	1938	1917	1206	1195	1782	10938	10799	11238	12779	13033	12444	3.59	3.59	854	348	150	3.59	36	3.59	3.59	58	54	58	5924	6416	6280	6510	6202	6505
10.89_905.76				905.758	ESI (+)	10.889	7918	11586	6424	4963	5842	7891	37730	36450	39192	41159	44260	42331	5993	6158	6124	5640	4724	4375	79	39	68	3.85	3.85	3.85	30294	30684	30834	29990	30413	29900
11.00_900.81				900.806	ESI (+)	11.001	3.3	288	754	298	3.3	3.3	6081	6305	9377	11746	14154	8650	14017	12859	14259	13560	10999	10466	34	40	33	37	83	111	1285	3997	3634	1091	2114	996
10.65_903.75				903.749	ESI (+)	10.646	2445	3511	3310	2362	2539	3920	15105	13907	15581	17435	17334	16646	4932	1990	3585	1533	1454	244	3.03	30	41	59	3.03	55	6662	7281	6859	6971	6769	7152
10.68_898.79				898.788	ESI (+)	10.681	7159	10122	13406	6940	8197	11756	87051	84931	100788	114519	127311	114468	12671	11411	12429	10496	9691	6232	56	27	58	2.69	69	73	34489	34663	32596	30874	29605	29763
9.87_899.71				899.71	ESI (+)	9.866	1113	1336	1272	1045	631	1293	8373	8112	10730	10420	10491	10226	3261	3124	3551	3283	3291	3121	72	28	42	48	2.85	39	4641	4441	4771	4817	4714	4727
9.56_892.74				892.74	ESI (+)	9.562	1436	4001	3890	2155	1777	2788	6405	5974	6922	7935	8322	7342	1529	1339	1622	1459	1465	1683	57	35	40	32	89	47	3298	3348	3351	3081	2878	3255
10.95_883.72				883.716	ESI (+)	10.946	3224	3483	4781	2521	3216	4285	18179	16946	18921	20381	19734	19269	232	182	3.6	36	36	96	39	3.6	54	3.6	87	3.6	13262	13140	12714	12451	12481	15010
10.73_881.70				881.704	ESI (+)	10.73	23563	25238	21104	15199	17248	21504	33277	32090	34575	36209	33921	33573	2.75	2.75	2.75	2.75	2.75	2.75	99	78	46	28	72	35	32665	31336	31832	30910	30878	38564
9.06_902.72				902.723	ESI (+)	9.056	8097	10633	9320	4864	6775	10630	13065	12478	17565	19396	19940	18299	51	57	64	58	57	106	65	3.45	35	25	29	48	7532	7849	7537	7429	7647	7611
10.96_918.85				918.848	ESI (+)	10.958	3256	4335	3704	2353	2041	3078	16720	17018	18989	19676	22987	20127	402	185	203	403	486	352	42	55	26	67	51	34	10627	11021	10961	10771	10639	10268
11.37_921.79				921.794	ESI (+)	11.371	3631	5382	4047	2020	2857	4016	23988	12909	18816	25458	20233	19951	542	654	5.82	5.82	5.82	5.82	5.82	62	71	58	69	5.82	14486	13912	11839	11339	9266	10446
10.29_916.83				916.833	ESI (+)	10.289	5.15	5.15	5.15	5.15	5.15	5.15	9902	9728	11872	11037	14211	13318	17797	18409	20903	20531	17954	17563	123	108	5.15	81	52	5.15	7463	7996	8948	9753	10051	9997
11.07_914.82				914.822	ESI (+)	11.073	8927	12718	11837	6349	8647	12205	91248	87024	79421	115103	135642	118207	314	730	532	1198	814	786	0.75	7	49	53	43	65	26280	26307	24735	24930	24857	24817
10.36_912.80				912.8	ESI (+)	10.359	1477	2621	1619	543	756	775	21547	20376	23498	25827	31586	28650	3962	3742	4123	4334	4079	4608	101	58	112	48	44	46	8262	3719	7969	4116	4335	4502
10.76_912.80				912.804	ESI (+)	10.755	15124	19419	18366	8897	12427	20153	120040	118594	130005	146662	168495	153698	2028	1822	1448	1977	1899	1359	36	34	65	54	36	38	39779	39364	37959	38405	39085	40934
10.58_910.79				910.787	ESI (+)	10.577	30851	38847	37137	20451	26990	42604	179011	189135	216027	229962	283994	255584	375	451	210	220	209	544	2.93	29	121	60	37	50	70536	69660	69942	70419	73394	78374
10.00_913.73				913.729	ESI (+)	10.004	1506	1770	976	999	636	1638	7001	6863	7815	8194	9216	8607	3.65	3.65	3.65	3.65	3.65	3.65	56	3.65	3.65	61	37	3.65	3875	4151	3795	3646	3508	3708
10.01_908.77				908.77	ESI (+)	10.007	5784	7732	6045	3675	4409	6212	25106	23741	28221	30312	33695	31683	700	796	904	691	698	606	59	3.16	55	3.16	3.16	32	12933	12433	12033	12330	12179	11579
10.14_913.73				913.729	ESI (+)	10.137	9669	11049	10244	6092	7908	10930	35031	35547	40730	42144	51946	48146	238	0.8	0.8	0.8	154	136	55	8	69	26	0.8	32	16011	16734	16312	16225	16582	16357
9.45_904.74				904.738	ESI (+)	9.445	3069	14023	10140	5691	4153	6999	13209	12561	15016	16714	17599	16542	96	65	61	44	60	97	50	113	74	73	45	4.39	7526	7637	7672	6899	7381	7285
11.32_934.88				934.879	ESI (+)	11.323	2500	3585	5878	3587	3822	6047	18606	18925	20507	21274	24671	21679	92	37	3.66	85	192	78	45	102	172	126	55	226	11309	10826	11099	10533	10756	10172
9.38_921.70				921.696	ESI (+)	9.38	1666	1936	1984	1394	1396	2382	5988	5796	7137	6999	8582	8339	3.7	3.7	3.7	3.7	3.7	3.7	3.7	65	54	3.7	37	3.7	2783	3566	3307	3803	3580	3683
10.94_932.87				932.866	ESI (+)	10.944	5305	8213	11185	6594	7124	10611	76117	76245	89676	86617	101970	91661	4.7	250	4.7	4.7	4.7	257	49	183	68	47	65	48	41720	42043	43128	41574	42248	39631
11.54_935.80				935.803	ESI (+)	11.539	4595	1041	542	2838	3448	4270	3920	24828	29806	3158	36345	7333	2510	2368	1766	533	195	376	41	4.13	4.13	4.13	55	44	3878	2677	14727	13077	13331	12029
11.26_933.80				933.798	ESI (+)	11.264	3396	2959	1813	481	2769	1152	2683	6104	4953	2846	3149	5290	6.64	684	488	512	524	578	6.64	6.64	6.64	6.64	6.64	66	6510	6521	4408	6127	6172	4703
11.09_926.82				926.819	ESI (+)	11.087	4323	6312	7001	3808	4894	6751	29251	28616	31653	39356	45142	40465	4915	4408	4551	3145	1835	547	32	114	7	37	0.74	28	11139	10982	10532	10752	10730	10160
10.67_929.76				929.758	ESI (+)	10.673	6371	8508	6351	3916	4936	6934	19279	18982	20768	21271	24930	23686	3714	3906	6959	3630	3638	1410	65	73	66	59	27	56	8610	9344	9017	8961	8898	8659
10.08_922.79				922.787	ESI (+)	10.084	2031	2362	1635	1474	1562	2013	9735	9199	11099	12064	14408	13695	4749	4310	5208	4555	4326	3743	49	4.9	84	121	4.9	4.9	4431	4267	4025	4377	4080	4264
11.32_911.75				911.747	ESI (+)	11.322	3519	3957	4626	2979	3292	4830	12678	11839	13218	14107	14834	14529	85	125	84	4.39	95	4.39	44	55	51	71	51	44	8483	8550	8219	7695	7755	9484
9.58_918.76				918.756	ESI (+)	9.578	3168	5014	4222	1202	2441	4366	13211	12202	15572	16872	19006	17833	2559	2417	2614	2319	1998	2161	2.85	79	56	28	40	81	5435	5334	5412	5224	4945	5094
11.44_948.90				948.896	ESI (+)	11.443	1492	1663	3503	2182	1823	435	14193	13745	16057	17195	19892	18053	15183	15527	16614	16761	15423	3905	35	62	58	30	96	69	6846	7262	7341	7540	7620	6623
9.61_930.76				930.757	ESI (+)	9.608	5994	6879	5124	2538	3746	6312	9893	8798	10581	11834	12546	12126	56	115	74	80	1.01	78	51	34	46	37	63	10	6110	6149	5972	5739	5603	5991
9.48_935.71				935.709	ESI (+)	9.479	4107	4733	3583	1991	3032	5148	7718	8212	9046	9648	11622	10897	88	2.56	57	2.56	2.56	2.56	46	2.56	79	64	26	52	3531	4011	3940	3781	3593	3833
10.95_946.88				946.88	ESI (+)	10.948	1887	1250	2151	1528	2087	2832	11052	14675	13540	10718	15323	13669	199	258	312	386	404	373	30	47	106	2.98	62	83	6157	7829	8733	9921	10754	10842
11.13_944.86				944.864	ESI (+)	11.127	4462	5576	3978	2060	3282	4660	15572	16167	16636	17612	18665	17157	5913	5993	5486	5823	5523	5315	3.57	3.57	36	60	40	43	10433	10412	10210	10661	11066	10359
10.34_942.85				942.85	ESI (+)	10.34	0.76	0.76	0.76	0.76	259	0.76	4704	4526	4926	5407	5216	5650	79882	76917	85526	82793	77495	74546	50	39	0.76	46	8	118	2850	3224	3451	3316	3245	3186
10.99_943.78				943.778	ESI (+)	10.986	3536	4115	3334	1994	2488	3743	7709	7616	9095	10004	10231	10419	567	567	124	3.07	462	3.07	36	3.07	3.07	32	31	31	4375	4602	4450	4672	4275	3993
[truncated: 798 more rows]
