# Supplementary material for: Lipid homeostasis is essential for a maximal ER stress response
Source: eLife. 2023 Jul 25;12:e83884. doi: 10.7554/eLife.83884 (PMC10368420; doi:10.7554/eLife.83884)
Supplement: Supplementary file 1. — Proteins identified in meta-analysis of published LD isolation proteomes (Zhang et al., 2012; Na et al., 2015; Vrablik et al., 2015). Gene description, screen score (scored ±3 in 0.5 increments in comparison to Empty Vector/sec-11 RNAi control), and approximated developmental stage at time of screen noted. N/A corresponds to genes not screened due to RNAi availability. [file elife-83884-supp1.xlsx]

## Sheet: Supplementary File 1a
Gene Name	Sequence Name	Gene Description	Screen Score	Screen Larval Stage
inf-1	F57B9.6	Eukaryotic initiation factor 4A	-3	L4/Adult
rpl-10	F10B5.1	60S ribosomal protein L10	-3	L4/Adult
rpl-13	C32E8.2	60S ribosomal protein L13	-3	L3/L4
rpl-16	M01F1.2	60S ribosomal protein L13a	-3	L2/L3
rpl-17	Y48G8AL.8	60S ribosomal protein L17	-3	L4/Adult
rpl-19	C09D4.5	60S ribosomal protein L19	-3	L3
rpl-20	E04A4.8	60S ribosomal protein L18a	-3	Adult
rpl-23	B0336.10	60S ribosomal protein L23	-3	Adult
rpl-3	F13B10.2	60S ribosomal protein L3	-3	L3
rpl-35	ZK652.4	60S ribosomal protein L35	-3	L3/L4
rpl-9	R13A5.8	60S ribosomal protein L9	-3	L4/Adult
rps-0	B0393.1	40S ribosomal protein SA	-3	Adult
rps-1	F56F3.5	40S ribosomal protein S3a	-3	L3
rps-10	D1007.6	Ribosomal Protein, Small subunit	-3	Adult
rps-16	T01C3.6	40S ribosomal protein S16	-3	Adult
rps-18	Y57G11C.16	Ribosomal Protein, Small subunit	-3	L3/L4
rps-19	T05F1.3	40S ribosomal protein S19	-3	Adult
rps-20	Y105E8A.16	Ribosomal Protein, Small subunit	-3	L4/Adult
rps-3	C23G10.3	40S ribosomal protein S3	-3	L3/L4
rps-5	T05E11.1	40S ribosomal protein S5	-3	Adult
rps-8	F42C5.8	40S ribosomal protein S8	-3	L4/Adult
rps-9	F40F8.10	40S ribosomal protein S9	-3	L3/L4
atp-1	H28O16.1	ATP synthase subunit alpha, mitochondrial	-2.5	L3/L4
eef-1A.1	F31E3.5	Elongation factor 1-alpha	-2.5	Adult
eef-2	F25H5.4	Elongation factor 2	-2.5	Adult
rla-0	F25H2.10	60S acidic ribosomal protein P0	-2.5	Adult
rpl-2	B0250.1	60S ribosomal protein L8	-2.5	L4/Adult
rpl-22	C27A2.2	60S ribosomal protein L22	-2.5	L4/Adult
rpl-27	C53H9.1	60S ribosomal protein L27	-2.5	Adult
rpl-36	F37C12.4	60S ribosomal protein L36	-2.5	L4/Adult
rpl-6	R151.3	60S ribosomal protein L6	-2.5	Adult
rps-14	F37C12.9	40S ribosomal protein S14	-2.5	Adult
rps-15	F36A2.6	40S ribosomal protein S15	-2.5	Adult
rps-22	F53A3.3	Ribosomal Protein, Small subunit	-2.5	L4/Adult
rps-7	ZC434.2	40S ribosomal protein S7	-2.5	Adult
atp-2	C34E10.6	ATP synthase subunit beta, mitochondrial	-2	L3/L4
fib-1	T01C3.7	rRNA 2'-O-methyltransferase fibrillarin	-2	Adult
rab-1	C39F7.4	RAB family	-2	L3/L4
rpl-18	Y45F10D.12	60S ribosomal protein L18	-2	Adult
rpl-5	F54C9.5	60S ribosomal protein L5	-2	Adult
rps-11	F40F11.1	Ribosomal Protein, Small subunit	-2	Adult
rps-2	C49H3.11	40S ribosomal protein S2	-2	Adult
hsp-1	F26D10.3	Heat shock 70 kDa protein A	-1.5	Adult
hsp-90	C47E8.5	Heat shock protein 90	-1.5	Adult
let-767	C56G2.6	Very-long-chain 3-oxooacyl-coA reductase let-767	-1.5	Adult
tba-2	C47B2.3	Tubulin alpha-2 chain	-1.5	Adult
ucr-1	F56D2.1	Cytochrome b-c1 complex subunit 1, mitochondrial	-1.5	Adult
vha-13	Y49A3A.2	V-type proton ATPase catalytic subunit A	-1.5	L3/L4
vha-15	T14F9.1	Probable V-type proton ATPase subunit H 2	-1.5	L3/L4
act-4	M03F4.2	Actin-4	-1	Adult
ant-1.1	T27E9.1	Adenine Nucleotide Translocator	-1	Adult
atad-3	F54B3.3	ATPase family AAA domain-containing protein 3	-1	Adult
eat-6	B0365.3	Sodium/potassium-transporting ATPase subunit alpha	-1	Adult
eef-1G	F17C11.9	Probable elongation factor 1-gamma	-1	L4/Adult
F42G8.10	F42G8.10	NADH:ubiquinone oxidoreductase subunit B11	-1	Adult
hsp-60	Y22D7AL.5	Chaperonin homolog Hsp-60, mitochondrial	-1	Adult
T02H6.11	T02H6.11	ubiquinol-cytochrome c reductase binding protein	-1	Adult
tba-4	F44F4.11	Tubulin alpha chain	-1	Adult
Y7A5A.1	Y7A5A.1	24-dehydrocholesterol reductase	-1	Adult
acs-17	C46F4.2	Fatty Acid CoA Synthetase family	-0.5	Adult
ant-1.3	K01H12.2	Adenine Nucleotide Translocator; Mitochondrial	-0.5	Adult
B0491.5	B0491.5	enriched in the OLL, the PVD, and the germ line	-0.5	Adult
gdh-1	ZK829.4	Glutamate dehydrogenase	-0.5	Adult
ldp-1	F22F7.1	Lipid droplet localized protein	-0.5	Adult
nuo-2	T10E9.7	NADH Ubiquinone Oxidoreductase	-0.5	Adult
rab-7	W03C9.3	RAB family	-0.5	Adult
rack-1	K04D7.1	Guanine nucleotide-binding protein subunit beta-2-like 1	-0.5	Adult
rpl-31	W09C5.6	60S ribosomal protein L31	-0.5	Adult
rps-4	Y43B11AR.4	40S ribosomal protein S4	-0.5	Adult
algn-2	F09E5.2	Asparagine Linked Glycosylation (ALG) homolog, Nematode	0	Adult
alh-8	F13D12.4	Probable methylmalonate-semialdehyde dehydrogenase	0	Adult
cgh-1	C07H6.5	ATP-dependent RNA helicase cgh-1	0	Adult
cts-1	T20G5.2	Probable citrate synthase, mitochondrial	0	Adult
D2030.4	D2030.4	NADH dehydrogenase	0	Adult
dhs-19	T11F9.11	DeHydrogenases, Short chain	0	Adult
dhs-3	T02E1.5	DeHydrogenases, Short chain	0	Adult
F01G4.6	F01G4.6	Phosphate carrier protein, mitochondrial	0	Adult
F44B9.5	F44B9.5	Ancient ubiquitous protein 1 homolog	0	Adult
F52H2.6	F52H2.6	Diminuto-like protein	0	Adult
lec-1	W09H1.6	32 kDa beta-galactoside-binding lectin	0	Adult
par-5	M117.2	14-3-3-like protein 1	0	Adult
pdi-2	C07A12.4	Protein disulfide-isomerase 2	0	Adult
phb-2	T24H7.1	Mitochondrial prohibitin complex protein 2	0	Adult
plin-1	W01A8.1	Perilipin-1 homolog	0	Adult
rpl-32	T24B8.1	Ribosomal Protein, Large subunit	0	Adult
tba-7	T28D6.2	Tubulin alpha chain	0	Adult
tomm-20	F23H12.2	Mitochondrial import receptor subunit TOM20 homolog	0	Adult
unc-108	F53F10.4	RAB2A, member RAS oncogene family	0	Adult
vdac-1	R05G6.7	Probable voltage-dependent anion-selective channel	0	Adult
vit-1	K09F5.2	Vitellogenin-1	0	Adult
vit-2	C42D8.2	Vitellogenin-2	0	Adult
vit-6	K07H8.6	Vitellogenin-6	0	Adult
acs-4	F37C12.7	Fatty Acid CoA Synthetase family	0.5	Adult
tbb-1	K01G5.7	Tubulin beta chain	0.5	Adult
alh-4	T05H4.13	Aldehyde dehydrogenase	1	Adult
enpl-1	T05E11.3	Endoplasmin homolog	1	Adult
hsp-3	C15H9.6	Heat shock 70 kDa protein C	1	Adult
vit-5	C04F6.1	Vitellogenin-5	1	Adult
hsp-4	F43E2.8	Endoplasmic reticulum chaperone BiP homolog	2	Adult
ben-1	C54C6.2	Tubulin beta chain	N/A	N/A
dhs-9	Y32H12A.3	DeHydrogenases, Short chain	N/A	N/A
eef-1A.2	R03G5.1	Elongation factor 1-alpha	N/A	N/A
faah-4	Y56A3A.12	Fatty Acid Amide Hydrolase homolog	N/A	N/A
rpl-1	Y71F9AL.13	60S ribosomal protein L10a	N/A	N/A
rpl-15	K11H12.2	60S ribosomal protein L15	N/A	N/A
rpl-21	C14B9.7	60S ribosomal protein L21	N/A	N/A
rpl-4	B0041.4	60S ribosomal protein L4	N/A	N/A
rpl-7	F53G12.10	60S ribosomal protein L7	N/A	N/A
rpl-7A	Y24D9A.4	60S ribosomal protein L7a	N/A	N/A
rps-13	C16A3.9	40S ribosomal protein S13	N/A	N/A
rps-28	Y41D4B.5	40S ribosomal protein S28	N/A	N/A
rps-6	Y71A12B.1	40S ribosomal protein S6	N/A	N/A
sip-1	F43D9.4	Stress-induced protein 1	N/A	N/A
trap-1	Y71F9AM.6	TRanslocon-Associated Protein	N/A	N/A
tsn-1	F10G7.2	Staphylococcal nuclease domain-containing protein	N/A	N/A
vha-11	Y38F2AL.3	V-type proton ATPase subunit C	N/A	N/A
vit-4	F59D8.2	Vitellogenin-4	N/A	N/A
Y53F4B.18	Y53F4B.18	fatty acid amide hydrolase 2	N/A	N/A
Y69A2AR.18	Y69A2AR.18	ATP synthase F1 subunit gamma	N/A	N/A
ZK809.3	ZK809.3	X-ray repair cross complementing 5	N/A	N/A
