# Supplementary material for: Lipid homeostasis is essential for a maximal ER stress response
Source: eLife. 2023 Jul 25;12:e83884. doi: 10.7554/eLife.83884 (PMC10368420; doi:10.7554/eLife.83884)
Supplement: Supplementary file 2. — Median lifespan, death events counted, and statistics for tunicamycin survival assay of worms grown on Empty Vector (EV) or let-767 RNAi combined with EV or sbp-1 RNAi. [file elife-83884-supp2.xlsx]

## Sheet: Supplementary File 2a
Supplemental Table S2. Statistical Analyses of Tunicamycin Survival Data
Corresponding Figure	Strain, Treatment	Median Lifespan [days]	# Deaths/# Total	% Change in Median Lifespan	p-value Log-rank (Mantel-Cox)
3E	N2, Empty Vector RNAi, 25ng/µL tunicamycin	14	71/100	n/a	n/a
	N2, sbp-1/Empty Vector RNAi, 25ng/µL tunicamycin	15	97/100	7.1	0.6013
	N2, let-767/Empty Vector RNAi, 25ng/µL tunicamycin	8	67/100	-42.9	<0.0001
	N2, let-767/sbp-1 RNAi, 25ng/µL tunicamycin	14	97/100	0	0.3637
3F	N2, vector RNAi, 1% DMSO	21	76/100	n/a	n/a
	N2, sbp-1/Empty Vector RNAi, 1% DMSO	14	96/100	-33.3	<0.0001
	N2, let-767/Empty Vector RNAi, 1% DMSO	8	33/50	-61.9	<0.0001
	N2, let-767/sbp-1 RNAi, 1% DMSO	13	96/13	-38.1	<0.0001
Replicates
3E/F V2	N2, Empty Vector RNAi, 25ng/µL tunicamycin	12	71/100	n/a	n/a
	N2, sbp-1/Empty Vector RNAi, 25ng/µL tunicamycin	14	85/100	16.7	0.7
	N2, let-767/Empty Vector RNAi, 25ng/µL tunicamycin	8	42/100	-33.3	<0.0001
	N2, let-767/sbp-1 RNAi, 25ng/µL tunicamycin	14	86/100	16.7	0.7
	N2, vector RNAi, 1% DMSO	19	66/100	n/a	n/a
	N2, sbp-1/Empty Vector RNAi, 1% DMSO	15	84/100	-21.1	<0.0001
	N2, let-767/Empty Vector RNAi, 1% DMSO	7	29/100	-63.2	<0.0001
	N2, let-767/sbp-1 RNAi, 1% DMSO	15	83/100	-21.1	<0.0001
3E/F V3	N2, Empty Vector RNAi, 25ng/µL tunicamycin	11	114/120	n/a	n/a
	N2, sbp-1/Empty Vector RNAi, 25ng/µL tunicamycin	11	115/120	0	0.7
	N2, let-767/Empty Vector RNAi, 25ng/µL tunicamycin	6	102/120	-45.5	<0.0001
	N2, let-767/sbp-1 RNAi, 25ng/µL tunicamycin	11	114/121	0	0.7
	N2, vector RNAi, 1% DMSO	17	102/120	n/a	n/a
	N2, sbp-1/Empty Vector RNAi, 1% DMSO	13	100/120	-23.5	<0.0001
	N2, let-767/Empty Vector RNAi, 1% DMSO	6	47/120	-64.7	<0.0001
	N2, let-767/sbp-1 RNAi, 1% DMSO	12	98/120	-29.4	<0.0001
