# Supplementary material for: Lipid homeostasis is essential for a maximal ER stress response
Source: eLife. 2023 Jul 25;12:e83884. doi: 10.7554/eLife.83884 (PMC10368420; doi:10.7554/eLife.83884)
Supplement: Supplementary file 3. — Normalized values and fold change of identified lipids from let-767 RNAi treated animals compared to EV controls at day 1 of adulthood. Standard deviation and averages calculated from 6 biological replicates. [file elife-83884-supp3.xlsx]

## Sheet: Supplementary File 3
ESI Mode	Normalizing Standard	Lipid	Normalized Value	Std. Dev.	Fold Change to N2
ESI -	Ceramide d18:1/17:0; iSTD	Ceramide d32:1;	0.0471009	0.0356979	2.97679
		Ceramide d34:1;	0.292613	0.416637	2.35183
		Ceramide d36:1;	0.26001	0.453864	3.12205
		Ceramide d38:1;	0.795888	0.219477	4.03752
		Ceramide d39:1;	0.129553	0.0308312	0.707376
		Ceramide d40:0;	0.0567384	0.029782	1.95509
		Ceramide d40:1;	0.110713	0.0698599	0.94664
		Ceramide d41:1;	0.018316	0.021096	0.394037
		Ceramide d42:0;	0.122819	0.0640037	1.95785
		Ceramide d42:1;	0.0451616	0.0535711	0.973942
		Ceramide d43:1;	0.0445119	0.0189637	0.0938195
		Cer-AP t41:0+O; Cer-AP t17:0/24:0+O;	0.061647	0.0141359	0.179695
		Cer-AS d41:1+O; Cer-AS d17:1/24:0+O;	0.22425	0.0586183	0.0573562
	FA 16:0-d3; iSTD	FA 12:0; (lauric acid)	14.2426	8.69142	0.5314
		FA 13:0; (tridecylic acid)	6.58818	7.67084	1.26279
		FA 14:0; (myristic acid)	69.3641	45.2721	1.04564
		FA 14:1; (physeteric acid)	1.5471	0.365567	0.723928
		FA 15:0; (pentadecylic acid)	42.4822	30.0002	1.32429
		FA 15:1;	10.2759	4.07444	1.13608
		FA 16:1; (palmitoleic acid)	35.2354	10.7436	0.727019
		FA 17:1;	429.554	143.308	1.24739
		FA 18:1; (oleic acid)	265.293	79.6393	0.791501
		FA 18:2; (linoleic acid)	98.6636	40.1002	0.57434
		FA 18:3; (linolenic acid)	96.0232	31.08	2.13958
		FA 18:4;	92.8953	29.9994	6.05288
		FA 19:1;	448.724	163.251	1.24313
		FA 20:1; (eicosenoic acid)	18.1531	6.51962	1.63608
		FA 20:2; (eicosadienoic acid)	7.75795	3.12173	1.08521
		FA 20:3; (eicosatrienoic acid)	1.27212	0.484746	1.21352
		FA 20:3; (homo-gamma-linolenic acid)	92.6512	37.0549	0.860611
		FA 20:4; (arachidonic acid)	58.7381	21.1099	1.0917
		FA 20:5; (eicosapentaenoic acid)	1043.37	368.514	1.1845
		FA 22:2; (docosadienoic acid)	0.265245	0.474619	1.44401
		FA 22:6; (docosahexaenoic acid)	0.423655	0.555847	0.687534
		FA 8:0; (caprylic acid)	0.138972	0.1512	0.763681
	LPC 17:0; iSTD	LPC 16:0;	8.17397	1.20372	0.458697
		LPC 16:1;	2.78231	0.882338	0.58311
		LPC 18:0; A	4.36799	1.14465	3.21531
		LPC 18:0; B	11.2152	2.31395	0.784653
		LPC 18:1;	15.0345	2.6152	0.395109
		LPC 18:2;	5.12316	1.17074	0.280974
		LPC 20:3;	4.42813	1.03277	0.4116
	LPE 17:1; iSTD	LPE 16:0;	18.1143	4.57211	0.310634
		LPE 18:2;	2.20793	0.420148	0.289281
		LPE 20:4;	0.422918	0.125917	0.357707
	PC 12:0/13:0; iSTD	PC 32:0;	4.98708	0.854293	1.2752
		PC 32:1;	13.7459	3.45602	0.280037
		PC 32:2;	5.55068	0.944183	0.730572
		PC 33:1;	5.10787	1.58815	1.82168
		PC 33:2;	42.1403	15.0628	1.63539
		PC 34:0;	1.09366	1.1079	0.595162
		PC 34:1;	21.8651	5.90468	0.528362
		PC 34:2;	10.7038	2.40346	0.389841
		PC 34:3;	15.0619	3.1775	1.6309
		PC 34:4;	9.28782	2.34342	1.35174
		PC 35:1;	8.71084	2.81982	2.34937
		PC 35:2;	177.347	43.5299	0.987035
		PC 35:4;	9.66512	2.77803	1.41167
		PC 36:1;	30.2188	6.30229	1.00415
		PC 36:2;	24.1294	4.38499	1.10692
		PC 36:3; A	10.8748	2.55588	0.378495
		PC 36:3; B	13.3349	2.31421	0.733738
		PC 36:4; A	28.6743	5.01335	1.10509
		PC 36:4; B	9.76246	1.72845	0.922833
		PC 36:5; A	23.8093	4.00808	1.19135
		PC 36:5; B	69.8041	12.3501	0.406728
		PC 37:2;	61.7033	12.5186	0.973491
		PC 37:4;	3.54855	0.392765	0.95468
		PC 38:2;	5.52257	2.27195	2.80148
		PC 38:3;	12.1315	2.42028	1.00706
		PC 38:4; A	5.75691	1.25463	0.937834
		PC 38:5; A	12.5069	2.08186	0.659964
		PC 38:5; B	66.8517	15.7951	0.833487
		PC 40:5; B	3.0011	0.780373	0.696093
		PC 40:6; A	3.95195	1.04999	1.18306
		PC 40:8;	2.89999	0.658631	0.725126
		PC p-36:1; or PC o-36:2;	6.58238	1.65318	0.797391
		PC p-38:4; or PC o-38:5; B	1.04473	0.543508	2.90332
	PE 17:0/17:0; iSTD	PE 33:0; PE 15:0-18:0;	7.00168	1.25131	0.121248
		PE 33:1; PE 15:0-18:1;	3.7297	0.839387	0.0905268
		PE 33:1; PE 16:0-17:1;	427.562	127.053	1.1482
		PE 33:2; PE 16:1-17:1;	31.4827	10.2249	0.549658
		PE 34:1;	274.859	68.4644	0.665376
		PE 34:1e; PE 18:0e/16:1;	18.1181	3.91141	0.399545
		PE 34:2;	64.8372	20.0384	0.262674
		PE 34:3; PE 16:0-18:3;	19.5242	7.45745	0.455685
		PE 35:0; PE 17:0-18:0;	5.51496	1.64579	0.256997
		PE 35:1; PE 17:0-18:1;	24.2626	4.72142	0.327322
		PE 35:1; PE 18:0-17:1;	898.515	216.242	1.29833
		PE 35:1e; PE 18:0e/17:1;	153.345	43.8805	0.477371
		PE 35:2; PE 17:1-18:1;	374.663	105.52	1.4871
		PE 35:2e; PE 18:1e/17:1;	685.36	185.551	2.24995
		PE 35:3; PE 17:1-18:2;	36.6623	9.63008	0.428124
		PE 35:4; PE 17:1-18:3;	14.8631	4.04047	0.460373
		PE 35:5; PE 15:0-20:5;	11.7822	3.0793	0.363852
		PE 36:0; PE 17:0-19:0;	11.2506	2.83321	1.73096
		PE 36:1;	6.1376	0.806346	1.78223
		PE 36:1e; PE 18:0e/18:1;	223.769	72.5573	0.2727
		PE 36:2;	166.098	44.947	0.500904
		PE 36:2; PE 18:1-18:1;	223.82	55.468	1.90582
		PE 36:2e; PE 18:0e/18:2;	43.3205	14.1632	0.116262
		PE 36:3;	69.2091	18.6385	0.922822
		PE 36:3; PE 18:0-18:3;	31.8052	8.56084	0.591417
		PE 36:4; PE 16:0-20:4;	52.7051	12.23	0.391447
		PE 36:4e; PE 18:1e/18:3;	13.6512	3.44767	0.944204
		PE 36:5; PE 16:0-20:5;	494.395	151.814	0.866187
		PE 37:1; PE 18:0-19:1;	187.81	52.0492	1.29311
		PE 37:1e; PE 18:0e/19:1;	20.5077	7.07869	0.297018
		PE 37:2; PE 18:1-19:1;	225.219	53.6371	2.0443
		PE 37:2e; PE 18:1e/19:1;	84.8483	29.7698	1.46689
		PE 37:2e; PE 19:1e/18:1;	46.641	16.2806	0.884086
		PE 37:3; PE 19:1-18:2;	39.6997	10.7114	0.810594
		PE 37:3e; PE 19:1e/18:2;	6.32368	2.24578	0.40257
		PE 37:5; PE 17:0-20:5;	58.6306	13.165	0.283027
		PE 37:6; PE 17:1-20:5;	130.506	36.6615	1.99465
		PE 38:1; PE 20:0-18:1;	67.4005	18.8282	2.59696
		PE 38:2;	2.32911	0.368214	1.14483
		PE 38:2; PE 20:0-18:2;	19.2568	5.77449	0.837238
		PE 38:2e; PE 18:0e/20:2;	5.61025	2.53802	0.239031
		PE 38:2e; PE 18:1e/20:1;	23.0656	7.5208	1.88447
		PE 38:3; PE 18:0-20:3;	105.192	27.6895	0.79846
		PE 38:3e; PE 18:0e/20:3;	13.2485	3.42586	0.112265
		PE 38:4; A	7.51215	1.71325	1.32132
		PE 38:4; B	49.073	11.1215	0.903352
		PE 38:4; PE 18:0-20:4;	180.415	49.4325	0.97862
		PE 38:5; PE 18:0-20:5;	1235.21	319.454	1.34873
		PE 38:5; PE 18:1-20:4;	41.6939	10.9241	0.812194
		PE 38:6;	2.50635	0.497473	3.03586
		PE 38:6; PE 18:1-20:5;	228.865	58.9628	1.29628
		PE 38:6e; PE 18:1e/20:5;	355.629	98.5474	0.601854
		PE 38:7; PE 18:2-20:5;	22.5608	6.07905	0.834906
		PE 38:8; PE 18:3-20:5;	11.9334	3.02026	1.1408
		PE 39:1; PE 22:0-17:1;	26.1688	7.60623	1.07238
		PE 40:1; PE 22:0-18:1;	21.5192	6.09059	3.33614
		PE 40:10; PE 20:5-20:5;	39.2064	10.7633	1.55692
		PE 40:2; PE 22:0-18:2;	5.99635	2.16376	0.859796
		PE 40:5; PE 20:0-20:5;	38.8701	8.66123	1.19901
		PE 40:6;	1.02957	0.220167	1.20678
		PE 40:9; PE 20:4-20:5;	27.3829	7.0669	0.980152
		PE p-34:1; or PE o-34:2;	31.5058	6.88077	1.65033
		PE p-34:2; or PE o-34:3;	7.29921	1.91905	3.62152
		PE p-36:1; or PE o-36:2;	1239.82	329.567	1.07368
		PE p-36:2; or PE o-36:3;	130.138	43.0303	0.41262
		PE p-36:4; or PE o-36:5;	12.9803	4.08257	4.80497
		PE p-36:5; or PE o-36:6;	3.24985	1.11621	14.4308
		PE p-38:2; or PE o-38:3;	16.0144	6.08209	0.630419
		PE p-38:3; or PE o-38:4;	84.8075	24.9274	0.4229
		PE p-38:4; or PE o-38:5;	29.0325	7.42577	0.314634
		PE-Cer d39:1;	31.6841	9.26764	0.674244
		PE-Cer t39:1; PE-Cer t20:0/19:1;	25.3966	6.01904	0.94097
	PG 17:0/17:0; iSTD	PG 36:1; PG 18:0-18:1;	29.4737	11.8789	0.476433
	PI (15:0-18:1)-d7; iSTD?	PI 33:1; PI 16:0-17:1;	15.5727	6.9481	4.60064
		PI 35:2; PI 17:1-18:1;	37.331	12.611	5.40797
		PI 36:1; PI 18:0-18:1;	49.1625	21.0883	2.40288
		PI 36:3; PI 18:1-18:2;	9.51866	2.55478	0.594066
		PI 36:5; PI 16:0-20:5;	46.2526	15.3531	0.443883
		PI 37:5; PI 17:0-20:5;	50.8149	12.7601	2.09582
		PI 38:4; PI 18:0-20:4;	36.566	9.37351	1.20914
		PI 38:5; PI 18:0-20:5;	990.536	240.102	1.1133
		PI 38:6; PI 18:1-20:5;	85.9599	21.7479	0.419977
		PI 39:6; PI 19:1-20:5;	87.2982	22.3343	0.827122
		PS 36:5; PS 16:0-20:5;	22.6808	5.3094	0.991627
		PS 38:4; PS 18:0-20:4;	28.7326	6.76704	1.11508
		PS 38:5; PS 18:0-20:5;	305.395	77.2202	1.53991
	SM d18:1/17:0; iSTD	SM d32:1;	0.482074	0.118339	18.7182
		SM d34:1;	0.467178	0.452279	11.5466
		SM d38:1;	5.51557	0.937522	7.57202
		SM d39:1;	12.0698	2.85653	0.411725
		SM d40:1;	1.22361	0.270453	0.92887
		SM d41:1;	0.829102	0.22874	0.224411
		SM d43:1;	0.154747	0.083736	0.216815
ESI +	Cer d18:1/17:0; iSTD	Cer d38:1;	1.22337	0.22829	4.63406
		Cer d42:2; B	0.0628138	0.0499663	1.32388
		Cer-NS d39:1; Cer-NS d17:1/22:0;	0.425055	0.125374	0.128849
		Cer-NS d39:2; Cer-NS d17:1/22:1;	1.72347	0.455069	0.179484
		Cer-NS d41:2; Cer-NS d17:1/24:1;	0.506757	0.139692	0.0550765
	Cholesterol d7 iSTD	Cholesterol	106.967	26.6306	1.35434
	DG 12:0/12:0/0:0; iSTD & DG 18:1/2:0/0:0; iSTD	DAG 35:2; DAG 17:1-18:1;	58.8185	20.7471	1.44042
		DAG 35:3; DAG 17:1-18:2;	38.5058	14.8451	0.789495
		DAG 35:5; DAG 15:0-20:5;	54.6382	16.2995	0.46945
		DAG 36:5; DAG 16:0-20:5;	114.192	37.2582	0.881026
		DAG 37:6; DAG 17:1-20:5;	638.105	238.882	1.37705
		DAG 38:5; DAG 18:0-20:5;	454.88	161.173	2.69658
		DAG 38:7; DAG 18:2-20:5;	209.72	73.1607	0.544191
		DAG 40:10; DAG 20:5-20:5;	1230.13	769.201	0.83155
		DAG 40:8; DAG 20:3-20:5;	342.999	108.992	0.668889
		DAG 40:9; DAG 20:4-20:5;	256.969	95.6574	0.635162
		DG 34:1;	15.9177	4.6863	0.84482
		DG 34:2;	15.7613	5.68641	0.500836
		DG 34:3;	11.729	4.21776	1.01072
		DG 36:1;	31.2537	10.6502	2.63997
		DG 36:2;	20.209	4.26117	0.659603
		DG 36:3;	35.3788	11.8069	0.449615
		DG 36:4; A	34.5194	9.16393	1.08114
		DG 36:4; B	39.5281	11.9104	0.627222
		DG 36:5;	48.7546	11.6084	1.35281
		DG 36:6;	64.9325	13.6496	0.745241
		DG 38:5;	30.497	8.77924	0.732887
		DG 38:6;	467.132	199.473	1.14229
	LPC 17:0; iSTD	LPC 17:1;	384.258	94.4231	1.45313
		LPC 20:2;	8.27002	4.5568	0.821161
		LPC 14:0;	22.9636	8.52595	0.36071
		LPC 15:0;	7.19713	3.46818	0.0325016
		LPC 16:0;	146.205	28.0609	0.489182
		LPC 16:1;	69.6411	18.3392	0.571179
		LPC 17:1-SN1;	736.548	174.454	0.696071
		LPC 18:0;	53.4649	21.4461	3.29635
		LPC 18:1;	274.928	52.4486	0.41102
		LPC 18:2;	125.343	34.8744	0.300547
		LPC 18:3;	142.177	31.6572	0.799379
		LPC 19:1-SN1;	178.851	139.942	1.4083
		LPC 20:3;	117.916	33.2865	0.476386
		LPC 20:4;	256.711	83.0827	0.493993
		LPC 20:5;	785.537	221.968	0.605854
	LPE 17:1; iSTD	LPE 16:0;	20.5146	5.21245	0.331762
		LPE 18:0;	8.31684	17.8713	12.3213
		LPE 18:1;	66.9949	12.1014	1.74743
		LPE 18:2;	3.442	0.655526	0.294826
		LPE 20:4;	5.55635	2.56465	0.358352
	PC 12:0/13:0; iSTD	PC 28:0;	0.866214	0.442761	1.3665
		PC 30:0;	3.9735	1.06212	0.778036
		PC 30:1;	5.95413	1.62762	0.879538
		PC 31:1 B;	55.902	18.3674	1.41835
		PC 31:1 A;	2.41926	1.33241	0.15386
		PC 31:2;	5.36726	1.56942	1.11801
		PC 32:0;	34.1549	8.64261	1.00712
		PC 32:1;	38.9611	12.3648	0.253017
		PC 32:2;	23.1845	6.88798	0.647089
		PC 32:2; PC 15:1-17:1;	53.4636	17.5904	2.79884
		PC 33:0;	1.54077	1.64367	0.0584762
		PC 33:1;	21.8688	7.17982	0.703345
		PC 33:1; PC 16:0-17:1;	262.505	119.986	1.78645
		PC 33:2;	6.10732	2.18622	0.0651459
		PC 33:4;	10.3955	3.76451	1.44468
		PC 34:0;	23.1258	8.9849	1.12067
		PC 34:1;	148.322	52.4289	0.685894
		PC 34:2;	98.3408	24.6475	0.471477
		PC 34:2; PC 17:1-17:1;	1513.52	550.762	2.43174
		PC 34:3 D;	23.3947	6.96865	0.78931
		PC 34:3; A	38.5245	14.1774	0.921184
		PC 34:3; B	68.2162	21.6863	1.46478
		PC 34:3; C	59.0164	20.9975	0.910499
		PC 34:4 A;	30.5288	9.68436	1.1729
		PC 34:4 B;	29.9136	9.29899	1.76148
		PC 34:5;	32.5937	10.1233	0.529592
		PC 35:1 B;	177.142	71.3948	1.93219
		PC 35:1 A;	27.2069	8.93868	0.935273
		PC 35:2;	754.788	269.548	1.18316
		PC 35:2; PC 17:1-18:1;	654.289	139.426	0.98432
		PC 35:3;	9.28429	3.97869	0.392912
		PC 35:3; PC 17:1-18:2;	220.032	78.0701	0.476472
		PC 35:4;	213.769	85.4638	1.34345
		PC 35:5;	161.897	58.0006	0.407198
		PC 35:6;	41.7695	11.5958	4.20663
		PC 36:1;	67.2762	23.5244	1.01134
		PC 36:2;	31.4344	13.8163	1.78384
		PC 36:2;	116.575	42.4801	0.819818
		PC 36:3; A	110.578	32.7452	0.405317
		PC 36:3; B	95.8056	30.647	0.776447
		PC 36:4; A	108.444	58.8112	0.827434
		PC 36:4; B	109.765	40.1894	0.624391
		PC 36:4; C	54.6807	17.1221	0.942111
		PC 36:5; B	63.651	24.1984	1.11315
		PC 36:5; C	95.4292	29.9609	1.59762
		PC 36:5; D	324.401	108.275	0.52829
		PC 36:6;	22.8633	8.46445	1.28792
		PC 36:6;	101.007	36.2955	0.933319
		PC 37:1;	39.8082	15.4589	1.6444
		PC 37:2;	154.29	55.104	1.12892
		PC 37:3;	143.527	50.9283	0.849987
		PC 37:4 B;	19.6614	8.15141	1.71145
		PC 37:4 A;	159.914	51.6506	1.34387
		PC 37:5;	34.4877	13.3632	1.06683
		PC 37:5;	182.082	61.8373	0.822711
		PC 37:6 A;	1803.18	546.99	1.07555
		PC 37:6 B;	23.8075	9.34836	0.539198
		PC 37:7; PC 17:2-20:5;	16.1871	6.52046	1.37457
		PC 37:7e;	4.46106	0.718394	0.335294
		PC 38:10;	38.1616	8.57836	15.748
		PC 38:2;	14.3596	5.09105	3.17815
		PC 38:3;	33.6678	11.6667	1.2462
		PC 38:4 B;	200.346	55.2452	0.893755
		PC 38:4; A	171.583	53.3058	0.824461
		PC 38:4; C	40.4364	14.8796	0.869646
		PC 38:5;	137.975	58.4328	0.547845
		PC 38:5; A	88.3648	26.617	0.644173
		PC 38:5; B	493.208	148.167	0.992859
		PC 38:6;	142.256	53.1334	0.747761
		PC 38:6;	768.081	245.193	0.580827
		PC 38:6; B	55.6505	26.7608	0.717651
		PC 38:6; C	15.3292	3.68147	0.489378
		PC 38:6e;	64.1064	17.6504	2.97989
		PC 38:7;	21.043	7.88485	0.494344
		PC 38:8;	146.282	65.1071	1.06415
		PC 38:9;	162.218	43.4124	3.95317
		PC 39:4;	86.0935	35.3784	1.1963
		PC 39:5 A;	306.259	108.287	1.21823
		PC 39:5 B;	152.678	54.8485	1.0536
		PC 39:6;	1068.36	313.641	1.02472
		PC 39:7;	28.0201	7.63154	1.36757
		PC 40:10; PC 20:5-20:5;	918.024	342.758	0.847041
		PC 40:4;	5.08433	2.4644	0.988798
		PC 40:5;	17.8138	5.39358	1.34035
		PC 40:5; A	4.01478	1.77592	1.47715
		PC 40:5; B	11.2956	4.58141	0.808388
		PC 40:6;	33.6165	13.0081	0.942112
		PC 40:6; A	10.9912	4.32305	1.27512
		PC 40:6; B	4.44036	1.49346	1.09334
		PC 40:7;	14.0818	3.34644	0.674907
		PC 40:7; A	50.769	23.6072	1.07835
		PC 40:7; B	14.0219	6.50251	0.754206
		PC 40:8;	243.205	97.7123	0.718199
		PC 40:9;	297.971	115.937	0.587653
		PC 41:6;	4.82613	2.20502	0.788701
		PC p-38:4/PC o-38:5; B	4.27536	2.36252	1.33071
		PC p-38:6/PC o-38:7;	1.87251	1.62222	2.60356
	PE 17:0/17:0; iSTD	PE 30:0;	59.6662	16.6106	3.95694
		PE 31:0;	5.64546	0.995839	0.0975808
		PE 31:1;	27.9132	5.38181	0.570757
		PE 32:0;	64.5364	13.6667	1.61871
		PE 32:1;	6.39243	3.44128	0.303558
		PE 32:1; PE 16:0-16:1;	86.3455	24.6813	0.348357
		PE 33:1;	5.82841	1.82951	0.110672
		PE 33:1;	26.4968	18.0555	0.829914
		PE 33:1; PE 16:0-17:1;	595.836	176.979	1.18634
		PE 33:2;	0.733335	0.597814	0.0205718
		PE 33:3;	7.45584	1.943	0.563637
		PE 34:1;	276.114	69.7554	0.621682
		PE 34:1e; PE 18:1e/16:0;	10.0283	2.13844	1.38222
		PE 34:2;	29.7412	6.53444	0.87125
		PE 34:2;	72.6889	15.1792	0.251569
		PE 34:3;	52.9617	15.7725	1.1851
		PE 34:4;	26.8517	9.8933	3.45254
		PE 34:5;	7.85686	1.38105	0.48639
		PE 35:0;	6.15085	1.4505	0.291433
		PE 35:1 B;	912.696	228.934	1.29776
		PE 35:1 A;	33.8133	5.76143	0.363877
		PE 35:2;	535.257	154.431	1.48703
		PE 35:4;	21.0881	4.33231	0.738634
		PE 36:0;	10.8233	2.24933	1.61447
		PE 36:1;	769.626	181.102	2.22253
		PE 36:1e;	179.528	48.9442	0.261248
		PE 36:2;	203.113	51.4001	0.518782
		PE 36:3;	74.377	16.7916	0.736041
		PE 36:3;	70.4035	16.7224	0.534189
		PE 36:4;	63.6366	14.6756	0.409738
		PE 36:4e; PE 18:1e/18:3;	18.0221	4.37808	1.04007
		PE 36:5;	482.197	229.666	0.775309
		PE 37:1;	164.392	37.1477	1.13908
		PE 37:2;	256.443	62.4803	1.95185
		PE 37:2e; PE 18:1e/19:1;	58.2321	16.189	1.29112
		PE 37:5;	91.7632	55.0613	0.339889
		PE 37:6;	142.348	39.1208	1.95292
		PE 38:1;	59.0261	12.6126	2.13134
		PE 38:2;	13.2474	16.1992	0.451044
		PE 38:2e; PE 18:1e/20:1;	17.5186	5.06693	1.62294
		PE 38:3;	144.92	36.9834	0.837036
		PE 38:4;	72.9192	16.4477	0.903805
		PE 38:5;	1784.19	404.615	1.19187
		PE 38:6;	417.281	203.594	1.24388
		PE 38:6;	6.71775	2.6506	0.913716
		PE 38:7;	26.777	6.98836	0.886429
		PE 38:8;	11.8698	2.99057	1.06214
		PE 39:1;	23.9125	5.09013	1.00552
		PE 39:6;	156.131	40.3883	2.28311
		PE 40:10;	36.7779	9.48952	1.55047
		PE 40:2;	6.00045	1.56848	0.790724
		PE 40:5;	59.2025	14.2004	1.244
		PE 40:9;	26.2879	6.2519	0.857422
		PE 42:5;	20.5221	5.43359	1.88161
		PE p-34:1/PE o-34:2;	30.6016	7.02936	1.62167
		PE p-36:1/PE o-36:2;	755.92	188.509	1.01508
		PE p-36:2/PE o-36:3;	110.372	31.3179	0.444891
		PE p-36:4/PE o-36:5;	20.7479	5.9472	5.80164
		PE p-38:4/PE o-38:5;	35.753	7.85834	0.359595
		PE p-38:5/PE o-38:6;	0.923043	0.207926	0.719368
		PI 38:5;	27.931	3.72107	1.02012
		PI 38:6;	4.01362	0.73688	0.542891
	SM d18:1/17:0; iSTD	SM d32:1;	0.0989925	0.0206815	13.6302
		SM d33:1;	0.179806	0.0582564	0.831329
		SM d34:1;	0.363699	0.0847439	10.3651
		SM d38:0;	0.641832	0.227969	53.02
		SM d38:1;	0.102192	0.109782	0.189677
		SM d39:1;	0.852081	0.379694	0.427458
		SM d40:1;	0.378529	0.12776	0.893466
		SM d41:1;	0.109247	0.0694597	0.168636
		SM d42:1;	0.00751464	0.0125923	0.151277
		SM d42:2;	0.00130978	0.00578327	0.291505
		SM t41:1;	1.68394	0.444944	0.360179
	TG (14:0/16:1/14:0)-d5 iSTD & TG d5 17:0/17:1/17:0; iSTD	TAG 40:0;	0.0904849	0.0476586	2.60039
		TAG 42:0;	0.234203	0.0776292	0.841858
		TAG 42:1;	0.0660107	0.0495946	0.3162
		TAG 42:2;	0.284584	0.0984166	0.488912
		TAG 44:0;	0.526397	0.132699	0.417892
		TAG 44:0; TAG 14:0-15:0-15:0;	0.033629	0.0978776	0.014428
		TAG 44:1;	1.02277	0.210085	0.294581
		TAG 44:2;	0.819859	0.353648	0.311794
		TAG 45:0; TAG 14:0-15:0-16:0;	0.269387	0.0657516	0.0527516
		TAG 45:0; TAG 15:0-15:0-15:0;	0.0250322	0.0238777	0.0106432
		TAG 45:1; TAG 14:0-15:0-16:1;	0.44112	0.0981793	0.0630822
		TAG 45:1; TAG 14:0-15:1-16:0;	2.70133	0.529844	0.559491
		TAG 45:2; TAG 11:0-17:1-17:1;	2.53896	0.636284	0.546223
		TAG 45:3; TAG 13:1-15:1-17:1;	1.6112	0.454896	0.973673
		TAG 45:3; TAG 14:1-14:1-17:1;	0.81666	0.184613	0.849594
		TAG 46:0;	1.13233	0.270777	0.216311
		TAG 46:0; TAG 14:0-15:0-17:0;	0.219177	0.989364	0.0273746
		TAG 46:1;	3.21559	0.80354	0.091245
		TAG 46:2;	1.81619	0.336605	0.188558
		TAG 46:2; TAG 14:0-15:1-17:1;	7.16135	1.95398	1.20317
		TAG 46:3; A	0.429854	0.127182	0.505339
		TAG 46:3; B	1.48223	0.325547	0.296559
		TAG 47:0; TAG 15:0-16:0-16:0;	0.589145	0.173233	0.0302689
		TAG 47:1; TAG 14:0-16:0-17:1;	6.11155	1.36603	0.161067
		TAG 47:2; TAG 15:0-15:1-17:1;	6.38073	1.4033	0.187809
		TAG 47:3; TAG 14:1-16:1-17:1;	1.77295	0.365178	0.35869
		TAG 47:3; TAG 15:1-15:1-17:1;	5.0596	1.15472	0.616802
		TAG 48:0;	1.99374	0.67552	0.193407
		TAG 48:1;	6.13102	1.79951	0.0437841
		TAG 48:2;	3.92335	1.03982	0.0553193
		TAG 48:2; TAG 14:0-17:1-17:1;	21.2902	4.86128	0.194279
		TAG 48:3;	1.36307	0.304252	0.187288
		TAG 48:3; TAG 15:1-16:1-17:1;	5.60284	1.16309	0.268999
		TAG 48:4; A	0.398523	0.141674	0.612357
		TAG 48:4; TAG 15:1-17:1-16:2;	0.961984	0.206308	0.584192
		TAG 48:5;	0.168855	0.110088	2.52227
		TAG 49:0;	0.403755	0.148184	0.0237855
		TAG 49:1;	2.43349	0.952602	0.0351125
		TAG 49:1; TAG 16:0-16:0-17:1;	14.8614	4.95797	0.120326
		TAG 49:2;	1.83169	0.471273	0.0770799
		TAG 49:2; TAG 15:0-17:1-17:1;	18.4341	4.91283	0.0420496
		TAG 49:3;	0.746151	0.223708	0.12366
		TAG 49:3; TAG 14:0-17:1-18:2;	4.27057	0.945391	0.147827
		TAG 49:3; TAG 15:1-17:1-17:1;	14.5356	3.84148	0.324313
		TAG 49:4; TAG 14:1-17:1-18:2;	1.72489	0.3511	0.4589
		TAG 49:5; TAG 14:1-17:1-18:3;	1.49285	0.333341	0.675954
		TAG 50:0; TAG 16:0-16:0-18:0;	1.53618	0.551873	0.261875
		TAG 50:1;	9.59306	3.70193	0.0677397
		TAG 50:2;	8.71882	2.78204	0.0413871
		TAG 50:2; TAG 16:0-16:1-18:1;	59.1705	14.5392	0.126544
		TAG 50:3; A	2.85403	0.917006	0.0643057
		TAG 50:3; B	28.4965	6.3438	0.122136
		TAG 50:4;	0.879243	0.162929	0.214536
		TAG 50:4; TAG 16:1-17:1-17:2;	6.53653	1.44566	0.398568
		TAG 50:5;	0.47287	0.186614	0.613426
		TAG 51:0; TAG 16:0-17:0-18:0;	0.26099	0.225686	0.04639
		TAG 51:1;	2.16143	1.05771	0.0392457
		TAG 51:1; TAG 16:0-18:0-17:1;	12.5417	4.57161	0.1374
		TAG 51:2;	3.44544	1.03534	0.0889262
		TAG 51:2; TAG 17:0-17:1-17:1;	37.8581	11.7542	0.0729943
		TAG 51:3;	0.524679	0.128131	0.0313323
		TAG 51:3; TAG 16:0-17:1-18:2;	8.60121	2.27486	0.0649187
		TAG 51:3; TAG 17:1-17:1-17:1;	412.464	114.932	0.361687
		TAG 51:4;	0.0345401	0.0367681	0.0473002
		TAG 51:4;	0.421636	0.0995157	0.108496
		TAG 51:5;	1.64762	0.395048	0.363582
		TAG 51:5; TAG 16:0-17:1-18:4;	3.02255	0.77684	0.324056
		TAG 51:6; TAG 14:0-17:1-20:5;	2.16089	0.577877	0.369525
		TAG 52:1;	9.50066	3.47509	0.165734
		TAG 52:2;	7.95358	1.99663	0.0526245
		TAG 52:2; TAG 16:0-17:1-19:1;	69.5253	15.6795	0.184575
		TAG 52:3;	8.18299	1.87165	0.0915194
		TAG 52:3; TAG 16:1-17:1-19:1;	76.8284	17.4701	0.109704
		TAG 52:4;	1.58809	0.403681	0.118282
		TAG 52:4; TAG 17:1-17:1-18:2;	17.1538	4.41822	0.144034
		TAG 52:5;	1.34708	0.368586	0.179591
		TAG 52:5; TAG 17:1-17:1-18:3;	5.15403	1.13726	0.182491
		TAG 52:6;	0.803479	0.147354	0.42908
		TAG 53:0;	0.989077	0.628919	0.195116
		TAG 53:1;	2.08388	0.905871	0.167101
		TAG 53:2;	1.59592	1.54529	0.0755146
		TAG 53:2; TAG 17:0-18:0-18:2;	40.8447	10.7224	0.15673
		TAG 53:3;	4.84968	0.942659	0.170937
		TAG 53:3; TAG 17:1-17:1-19:1;	93.5891	27.85	0.164902
		TAG 53:4;	1.13182	0.232722	0.139011
		TAG 53:5;	1.73725	0.649892	0.131898
		TAG 53:6; TAG 16:0-17:1-20:5;	6.26593	1.50309	0.19921
		TAG 53:6; TAG 17:1-18:2-18:3;	3.56438	0.78419	0.250751
		TAG 54:0;	4.73569	6.95916	1.61951
		TAG 54:1;	6.9174	3.26765	0.248025
		TAG 54:10; TAG 14:0-20:5-20:5;	0.453047	0.263697	1.13334
		TAG 54:2;	4.73284	0.978401	0.152601
		TAG 54:2; TAG 18:0-17:1-19:1;	9.87928	4.25657	0.119065
		TAG 54:2e; TAG 18:0e-18:1-18:1;	1.13221	0.789929	0.340588
		TAG 54:3;	4.61543	1.29288	0.124599
		TAG 54:3; TAG 17:1-18:1-19:1;	41.7167	10.7182	0.111855
		TAG 54:4;	2.31498	0.526196	0.0961042
		TAG 54:4; TAG 17:1-19:1-18:2;	8.42491	2.38662	0.103586
		TAG 54:5; A	1.12752	0.385791	0.139279
		TAG 54:5; B	9.81521	2.35923	0.146987
		TAG 54:6; A	3.9678	2.27242	0.408069
		TAG 54:6; C	12.2722	2.79409	0.235399
		TAG 54:7; A	0.385393	0.114355	0.502916
		TAG 54:7; B	1.32053	0.321067	0.271155
		TAG 54:7; TAG 16:1-18:1-20:5;	1.45416	0.328284	0.202959
		TAG 54:7; TAG 17:1-17:1-20:5;	16.8847	4.17232	0.40686
		TAG 55:2;	12.1775	4.6504	0.215296
		TAG 55:3;	4.02226	0.906011	0.0857956
		TAG 55:3; TAG 17:1-19:1-19:1;	11.8962	3.74979	0.195734
		TAG 55:4; TAG 18:1-19:1-18:2;	2.16868	0.551295	0.0818713
		TAG 55:5; TAG 17:1-18:1-20:3;	3.06257	0.722381	0.0762382
		TAG 55:6; TAG 18:0-17:1-20:5;	3.47383	0.734557	0.445098
		TAG 55:7; TAG 17:1-18:1-20:5;	9.03361	2.07948	0.237494
		TAG 56:0;	0.323777	0.352798	0.591984
		TAG 56:1;	4.59729	2.35604	0.41178
		TAG 56:1; TAG 18:0-20:0-18:1;	0.211305	0.523246	10.1462
		TAG 56:10;	1.21244	0.36015	0.721792
		TAG 56:10; TAG 16:0-20:5-20:5;	1.12263	0.671638	0.288311
		TAG 56:2;	3.29887	1.7238	0.364749
		TAG 56:2; TAG 20:0-17:1-19:1;	24.6549	7.37306	0.525683
		TAG 56:3;	0.878112	0.29792	0.396042
		TAG 56:3; TAG 18:1-19:1-19:1;	5.42061	2.26197	0.181212
		TAG 56:4;	0.617106	0.247525	0.171357
		TAG 56:4; TAG 18:0-18:1-20:3;	2.39394	0.725981	0.14741
		TAG 56:5; A	0.660864	0.390237	0.0850095
		TAG 56:5; B	1.44617	0.305114	0.136154
		TAG 56:5; C	2.69717	0.782558	0.0966021
		TAG 56:6;	0.808296	0.174201	0.232673
		TAG 56:6; TAG 17:1-19:1-20:4;	6.58848	1.77016	0.183967
		TAG 56:7; A	2.24156	0.665858	0.214291
		TAG 56:7; B	2.67433	0.677583	0.533505
		TAG 56:7; B	1.35563	0.733658	0.280611
		TAG 56:8; A	1.35682	0.588606	0.172292
		TAG 56:8; B	1.36193	0.327281	0.43654
		TAG 56:9;	0.676102	0.640849	0.272826
		TAG 57:1;	1.93426	1.76275	0.505055
		TAG 57:1; TAG 18:0-22:0-17:1;	0.288159	0.688556	25.4739
		TAG 57:11; TAG 17:1-20:5-20:5;	8.84496	2.60309	0.58567
		TAG 57:2;	4.2106	5.05616	5.28138
		TAG 57:3; TAG 17:1-19:1-21:1;	1.90894	0.816211	0.188922
		TAG 57:3; TAG 18:1-19:1-20:1;	1.28411	0.625893	0.325757
		TAG 57:5; TAG 18:1-19:1-20:3;	0.542776	0.224758	0.0638189
		TAG 57:6; TAG 18:0-19:1-20:5;	2.76261	0.67831	0.210992
		TAG 57:6; TAG 19:1-18:2-20:3;	1.75929	0.561994	0.180433
		TAG 57:8; TAG 19:1-18:2-20:5;	1.47987	0.516204	0.261558
		TAG 57:9; TAG 17:1-20:4-20:4;	2.90913	1.03045	0.462533
		TAG 58:1;	1.07673	0.718407	0.455196
		TAG 58:10;	0.394432	0.112425	0.430011
		TAG 58:10;	0.0114029	0.0294728	0.0168967
		TAG 58:10; TAG 18:0-20:5-20:5;	2.77492	0.889433	0.621423
		TAG 58:2;	3.17915	3.04876	0.509445
		TAG 58:3;	1.57146	0.601571	0.311543
		TAG 58:6;	0.314752	0.162707	0.285179
		TAG 58:7; TAG 19:1-19:1-20:5;	1.1521	0.493985	0.269164
		TAG 58:8;	0.231272	0.353547	0.069815
		TAG 58:9;	0.298721	0.1599	0.100958
		TAG 59:11; TAG 19:1-20:5-20:5;	2.38225	0.811928	0.696431
		TAG 59:2;	2.16919	1.49213	0.598826
		TAG 59:2; TAG 22:0-18:1-19:1;	0.317721	0.754312	34.0721
		TAG 59:3;	1.07127	0.850046	0.446678
		TAG 60:1;	0.199435	0.16108	0.188751
		TAG 60:2;	0.790142	0.789409	0.3248
		TAG 60:2; TAG 26:0-17:1-17:1;	0.198178	0.481712	87.7487
		TAG 60:3;	0.243085	0.215634	0.366141
		TAG 60:4;	0.450131	0.250856	0.427575
		TAG 61:2; TAG 27:0-17:1-17:1;	0.154787	0.367564	18.4453
		TAG 62:1;	0.0623734	0.0995281	1.09142
		TAG 62:2;	0.250537	0.288054	0.20989
		TAG 62:3;	0.0654572	0.091976	0.231295
		TAG 62:4;	0.0988741	0.0851631	0.423282
		TAG 64:2;	0.0956804	0.0777571	0.371534
